# Supplementary material
Source: Royal Society of Chemistry journal article supplement (doi:10.1039/d5nj05017k)
Supplement: d5nj05017k1.pdf [file d5nj05017k1.pdf]

## Supplementary Information

### **Mitochondria-targeted liposomes decorated by amphiphilic 2-hydroxypropylphosphonium salts for hyperthermia-induced release and antitumor application**

Tatiana N. Pashirova<sup>a,b\*</sup>, Evgenii A. Titov<sup>a,b</sup>, Andrey V. Nemtarev<sup>a,b\*</sup>, Zukhra M. Shaihutdinova<sup>a,b</sup>, Anna P. Lyubina<sup>a</sup>, Mudaris N. Dimukhametov<sup>a</sup>, Vladimir V. Salnikov<sup>c</sup>, Robert R. Fayzullin<sup>a</sup>, Yuliya V. Mursalova<sup>a</sup>, Irina S. Ryzhkina<sup>a</sup>, Alexandra D. Voloshina<sup>a</sup>, Vladimir F. Mironov<sup>a</sup>

*<sup>a</sup>Arbuzov Institute of Organic and Physical Chemistry, FRC Kazan Scientific Center of RAS, Arbuzov St. 8, 420088 Kazan, Russian Federation*

*<sup>b</sup>Kazan Federal University, 420008 Kazan, 18 Kremlyovskaya St., Russian Federation*

*<sup>c</sup>Kazan Institute of Biochemistry and Biophysics, Kazan Scientific Centre Russian Academy of Sciences, 420111, Kazan, 2/31 Lobachevsky St.*

#### **\*Corresponding authors:**

Tatiana N. Pashirova, Arbuzov Institute of Organic and Physical Chemistry, FRC Kazan Scientific Center of RAS, Arbuzov str. 8, Kazan, 420088, Russian Federation, tel: (007) 843 272 73 84, fax: (007) 843 273 22 53, E-mail: [tatyana\\_pashirova@mail.ru](mailto:tatyana_pashirova@mail.ru)

**Andrey V. Nemtarev** Arbuzov Institute of Organic and Physical Chemistry, FRC Kazan Scientific Center of RAS, Arbuzov str. 8, Kazan, 420088, Russian Federation, tel: (007) 843 272 73 84, fax: (007) 843 273 22 53, E-mail: [a.nemtarev@mail.ru](mailto:a.nemtarev@mail.ru)

## List of contents

|                                                                                                                                                                                                                                                                                                 |     |
|-------------------------------------------------------------------------------------------------------------------------------------------------------------------------------------------------------------------------------------------------------------------------------------------------|-----|
| Scheme S1. Synthesis of amphiphilic <b>3a-j</b> with different alkyl chain lengths where n = 0 (a), 1 (b), 3 (c), 5 (d), 7 (e), 9 (f), 11 (g), 13 (h), 15 (i), 17 (j) .....                                                                                                                     | S5  |
| Figure S1. $^{31}\text{P}$ - $\{^1\text{H}\}$ and $^{31}\text{P}$ NMR spectra ( $\text{CH}_2\text{Cl}_2$ , 162 MHz) of P-H-phosphonium salts: $\text{H-P}^+\text{Ph}_3$ $\text{CF}_3\text{SO}_3^-$ (a), $\text{H-P}^+\text{Ph}_3$ $\text{CF}_3\text{CO}_2^-$ (b).....                           | S6  |
| Figure S2. $^{31}\text{P}$ - $\{^1\text{H}\}$ NMR ( $\text{CH}_2\text{Cl}_2$ , 162 MHz) spectra of reactions mixtures of compound <b>1c</b> with P-H-phosphonium salts: $\text{H-P}^+\text{Ph}_3$ $\text{CF}_3\text{SO}_3^-$ (a), $\text{H-P}^+\text{Ph}_3$ $\text{CF}_3\text{CO}_2^-$ (b)..... | S7  |
| Characteristics of precursors of compounds <b>1</b> .....                                                                                                                                                                                                                                       | S8  |
| Figure S3. $^1\text{H}$ NMR (400 MHz, $\text{CDCl}_3$ ) spectrum of 1-butoxy-3-chloropropan-2-ol.....                                                                                                                                                                                           | S10 |
| Figure S4. IR spectrum (film) of 1-butoxy-3-chloropropan-2-ol. ....                                                                                                                                                                                                                             | S11 |
| Figure S5. EI-MS spectrum of 1-butoxy-3-chloropropan-2-ol.....                                                                                                                                                                                                                                  | S12 |
| Figure S6. $^1\text{H}$ NMR spectrum (400 MHz, $\text{CDCl}_3$ ) of 1-hexyloxy-3-chloropropan-2-ol.....                                                                                                                                                                                         | S13 |
| Figure S7. IR spectrum (film) of 1-hexyloxy-3-chloropropan-2-ol.....                                                                                                                                                                                                                            | S14 |
| Figure S8. EI-MS spectrum of 1-hexyloxy-3-chloropropan-2-ol. ....                                                                                                                                                                                                                               | S14 |
| Figure S9. $^1\text{H}$ NMR spectrum (400 MHz, $\text{CDCl}_3$ ) of 1-octyloxy-3-chloropropan-2-ol.....                                                                                                                                                                                         | S15 |
| Figure S10. IR spectrum (film) of 1-octyloxy-3-chloropropan-2-ol. ....                                                                                                                                                                                                                          | S16 |
| Figure S11. EI-MS spectrum of 1-octyloxy-3-chloropropan-2-ol.....                                                                                                                                                                                                                               | S16 |
| Figure S12. $^1\text{H}$ NMR spectrum (400 MHz, $\text{CDCl}_3$ ) of 1-dodecyloxy-3-chloropropan-2-ol. ....                                                                                                                                                                                     | S17 |
| Figure S13. IR spectrum (film) of 1-dodecyloxy-3-chloropropan-2-ol. ....                                                                                                                                                                                                                        | S18 |
| Figure S14. EI-MS spectrum of 1-dodecyloxy-3-chloropropan-2-ol. ....                                                                                                                                                                                                                            | S18 |
| Figure S15. $^1\text{H}$ NMR spectrum (400 MHz, $\text{CDCl}_3$ ) of 1-dodecyloxy-3-chloropropan-2-ol. ....                                                                                                                                                                                     | S19 |
| Figure S16. IR spectrum (film) of 1-tetradecyloxy-3-chloropropan-2-ol.....                                                                                                                                                                                                                      | S20 |
| Figure S17. EI-MS spectrum of 1-tetradecyloxy-3-chloropropan-2-ol. ....                                                                                                                                                                                                                         | S20 |
| Figure S18. $^1\text{H}$ NMR spectrum (400 MHz, $\text{CDCl}_3$ ) of 1-hexadecyloxy-3-chloropropan-2-ol.....                                                                                                                                                                                    | S21 |
| Figure S19. EI-MS spectrum of 1-hexadecyloxy-3-chloropropan-2-ol.....                                                                                                                                                                                                                           | S22 |
| Figure S20. EI-MS spectrum of 1-octadecyloxy-3-chloropropan-2-ol.....                                                                                                                                                                                                                           | S22 |
| Spectral data of compounds <b>1</b> .....                                                                                                                                                                                                                                                       | S23 |
| Figure S22. $^1\text{H}$ NMR spectrum (400 MHz, $\text{CDCl}_3$ ) of compound <b>1c</b> . ....                                                                                                                                                                                                  | S26 |
| Figure S23. $^{13}\text{C}$ - $\{^1\text{H}\}$ NMR spectrum (100.6 MHz, $\text{CDCl}_3$ ) of compound <b>1c</b> .....                                                                                                                                                                           | S27 |
| Figure S24. $^{13}\text{C}$ - $\{^1\text{H}\}$ APT NMR spectrum (100.6 MHz, $\text{CDCl}_3$ ) of compound <b>1c</b> . ....                                                                                                                                                                      | S28 |
| Figure S25. IR spectrum (film) of compound <b>1c</b> .....                                                                                                                                                                                                                                      | S29 |
| Figure S26. $^1\text{H}$ NMR spectrum (400 MHz, $\text{CDCl}_3$ ) of compound <b>1d</b> .....                                                                                                                                                                                                   | S30 |
| Figure S27. $^{13}\text{C}$ - $\{^1\text{H}\}$ NMR spectrum (100.6 MHz, $\text{CDCl}_3$ ) of compound <b>1d</b> .....                                                                                                                                                                           | S31 |
| Figure S28. $^{13}\text{C}$ - $\{^1\text{H}\}$ APT NMR spectrum (100.6 MHz, $\text{CDCl}_3$ ) of compound <b>1d</b> .....                                                                                                                                                                       | S32 |
| Figure S29. IR spectrum (film) of compound <b>1d</b> . ....                                                                                                                                                                                                                                     | S33 |
| Figure S30. EI-MS spectrum of compound <b>1d</b> .....                                                                                                                                                                                                                                          | S33 |
| Figure S31. $^1\text{H}$ NMR spectrum (400 MHz, $\text{CDCl}_3$ ) of compound <b>1e</b> .....                                                                                                                                                                                                   | S34 |
| Figure S32. $^{13}\text{C}$ - $\{^1\text{H}\}$ NMR spectrum (100.6 MHz, $\text{CDCl}_3$ ) of compound <b>1e</b> .....                                                                                                                                                                           | S35 |
| Figure S33. $^{13}\text{C}$ - $\{^1\text{H}\}$ APT NMR spectrum (100.6 MHz, $\text{CDCl}_3$ ) of compound <b>1e</b> .....                                                                                                                                                                       | S36 |
| Figure S34. IR spectrum (film) of compound <b>1e</b> .....                                                                                                                                                                                                                                      | S37 |
| Figure S35. EI-MS spectrum of compound <b>1e</b> . ....                                                                                                                                                                                                                                         | S37 |
| Figure S36. $^1\text{H}$ NMR spectrum (400 MHz, $\text{CDCl}_3$ ) of compound <b>1g</b> .....                                                                                                                                                                                                   | S38 |
| Figure S37. $^{13}\text{C}$ - $\{^1\text{H}\}$ NMR spectrum (100.6 MHz, $\text{CDCl}_3$ ) of compound <b>1g</b> .....                                                                                                                                                                           | S39 |
| Figure S38. $^{13}\text{C}$ - $\{^1\text{H}\}$ APT NMR spectrum (100.6 MHz, $\text{CDCl}_3$ ) of compound <b>1g</b> .....                                                                                                                                                                       | S40 |
| Figure S39. IR spectrum (film) of compound <b>1g</b> .....                                                                                                                                                                                                                                      | S41 |

|                                                                                                                           |     |
|---------------------------------------------------------------------------------------------------------------------------|-----|
| Figure S40. EI-MS spectrum of compound <b>1g</b> .....                                                                    | S41 |
| Figure S41. <sup>1</sup> H NMR spectrum (400 MHz, CDCl <sub>3</sub> ) of compound <b>1h</b> .....                         | S42 |
| Figure S42. <sup>13</sup> C- <sup>1</sup> H} NMR spectrum (100.6 MHz, CDCl <sub>3</sub> ) of compound <b>1h</b> .....     | S43 |
| Figure S43. <sup>13</sup> C- <sup>1</sup> H} APT NMR spectrum (100.6 MHz, CDCl <sub>3</sub> ) of compound <b>1h</b> ..... | S44 |
| Figure S44. IR spectrum (film) of compound <b>1h</b> .....                                                                | S45 |
| Figure S45. EI-MS spectrum of compound <b>1h</b> .....                                                                    | S45 |
| Figure S46. <sup>1</sup> H NMR spectrum (400 MHz, CDCl <sub>3</sub> ) of compound <b>1i</b> .....                         | S46 |
| Figure S47. <sup>13</sup> C- <sup>1</sup> H} NMR spectrum (100.6 MHz, CDCl <sub>3</sub> ) of compound <b>1i</b> .....     | S47 |
| Figure S48. <sup>13</sup> C- <sup>1</sup> H} APT NMR spectrum (100.6 MHz, CDCl <sub>3</sub> ) of compound <b>1i</b> ..... | S48 |
| Figure S49. IR spectrum (KBr) of compound <b>1i</b> .....                                                                 | S49 |
| Figure S50. EI-MS spectrum of compound <b>1i</b> .....                                                                    | S49 |
| Figure S51. <sup>1</sup> H NMR spectrum (400 MHz, CDCl <sub>3</sub> ) of compound <b>1j</b> .....                         | S50 |
| Figure S52. <sup>13</sup> C- <sup>1</sup> H} NMR spectrum (100.6 MHz, CDCl <sub>3</sub> ) of compound <b>1j</b> .....     | S51 |
| Figure S53. <sup>13</sup> C- <sup>1</sup> H} APT NMR spectrum (100.6 MHz, CDCl <sub>3</sub> ) of compound <b>1j</b> ..... | S52 |
| Figure S54. IR spectrum (KBr) of compound <b>1j</b> .....                                                                 | S53 |
| Figure S55. EI-MS spectrum of compound <b>1j</b> .....                                                                    | S53 |
| Spectral data of compounds <b>3</b> .....                                                                                 | S54 |
| Figure S56. <sup>1</sup> H NMR spectrum (400 MHz, CDCl <sub>3</sub> ) of compound <b>3c</b> .....                         | S58 |
| Figure S57. <sup>13</sup> C- <sup>1</sup> H} NMR spectrum (100.6 MHz, CDCl <sub>3</sub> ) of compound <b>3c</b> .....     | S59 |
| Figure S58. <sup>13</sup> C- <sup>1</sup> H} APT NMR spectrum (100.6 MHz, CDCl <sub>3</sub> ) of compound <b>3c</b> ..... | S60 |
| Figure S59. <sup>31</sup> P- <sup>1</sup> H} NMR spectrum (162 MHz, CDCl <sub>3</sub> ) of compound <b>3c</b> .....       | S61 |
| Figure S60. IR spectrum (KBr) of compound <b>3c</b> .....                                                                 | S62 |
| Figure S61. MALDI-MS spectrum of compound <b>3c</b> .....                                                                 | S62 |
| Figure S62. <sup>1</sup> H NMR spectrum (600 MHz, CDCl <sub>3</sub> ) of compound <b>3d</b> .....                         | S63 |
| Figure S63. <sup>13</sup> C- <sup>1</sup> H} NMR spectrum (100.6 MHz, CDCl <sub>3</sub> ) of compound <b>3d</b> .....     | S64 |
| Figure S64. <sup>13</sup> C- <sup>1</sup> H} APT NMR spectrum (100.6 MHz, CDCl <sub>3</sub> ) of compound <b>3d</b> ..... | S65 |
| Figure S65. <sup>31</sup> P- <sup>1</sup> H} NMR spectrum (162 MHz, CDCl <sub>3</sub> ) of compound <b>3d</b> .....       | S66 |
| Figure S66. IR spectrum (KBr) of compound <b>3d</b> .....                                                                 | S67 |
| Figure S67. MALDI-MS spectrum of compound <b>3d</b> .....                                                                 | S67 |
| Figure S68. <sup>1</sup> H NMR spectrum (400 MHz, CDCl <sub>3</sub> ) of compound <b>3e</b> .....                         | S68 |
| Figure S69. <sup>13</sup> C- <sup>1</sup> H} NMR spectrum (100.6 MHz, CDCl <sub>3</sub> ) of compound <b>3e</b> .....     | S69 |
| Figure S70. <sup>13</sup> C- <sup>1</sup> H} APT NMR spectrum (100.6 MHz, CDCl <sub>3</sub> ) of compound <b>3e</b> ..... | S70 |
| Figure S71. <sup>31</sup> P- <sup>1</sup> H} NMR spectrum (162 MHz, CDCl <sub>3</sub> ) of compound <b>3e</b> .....       | S71 |
| Figure S72. IR spectrum (KBr) of compound <b>3e</b> .....                                                                 | S72 |
| Figure S73. MALDI-MS spectrum of compound <b>3e</b> .....                                                                 | S72 |
| Figure S74. <sup>1</sup> H NMR spectrum (400 MHz, CDCl <sub>3</sub> ) of compound <b>3g</b> .....                         | S73 |
| Figure S75. <sup>13</sup> C- <sup>1</sup> H} NMR spectrum (100.6 MHz, CDCl <sub>3</sub> ) of compound <b>3g</b> .....     | S74 |
| Figure S76. <sup>13</sup> C- <sup>1</sup> H} APT NMR spectrum (100.6 MHz, CDCl <sub>3</sub> ) of compound <b>3g</b> ..... | S75 |
| Figure S77. <sup>31</sup> P- <sup>1</sup> H} NMR spectrum (162 MHz, CDCl <sub>3</sub> ) of compound <b>3g</b> .....       | S76 |
| Figure S78. IR spectrum (KBr) of compound <b>3g</b> .....                                                                 | S77 |
| Figure S79. ESI-MS spectrum of compound <b>3g</b> .....                                                                   | S77 |
| Figure S80. <sup>1</sup> H NMR spectrum (400 MHz, CDCl <sub>3</sub> ) of compound <b>3h</b> .....                         | S78 |
| Figure S81. <sup>13</sup> C- <sup>1</sup> H} NMR spectrum (100.6 MHz, CDCl <sub>3</sub> ) of compound <b>3h</b> .....     | S79 |
| Figure S82. <sup>13</sup> C- <sup>1</sup> H} APT NMR spectrum (100.6 MHz, CDCl <sub>3</sub> ) of compound <b>3h</b> ..... | S80 |
| Figure S83. <sup>31</sup> P- <sup>1</sup> H} NMR spectrum (162 MHz, CDCl <sub>3</sub> ) of compound <b>3h</b> .....       | S81 |
| Figure S84. IR spectrum (KBr) of compound <b>3h</b> .....                                                                 | S82 |
| Figure S85. ESI-MS spectrum of compound <b>3h</b> .....                                                                   | S82 |

|                                                                                                                                                     |      |
|-----------------------------------------------------------------------------------------------------------------------------------------------------|------|
| Figure S86. <sup>1</sup> H NMR spectrum (400 MHz, CDCl <sub>3</sub> ) of compound <b>3i</b> .....                                                   | S83  |
| Figure S87. <sup>13</sup> C- <sup>1</sup> H} NMR spectrum (100.6 MHz, CDCl <sub>3</sub> ) of compound <b>3i</b> .....                               | S84  |
| Figure S88. <sup>31</sup> P- <sup>1</sup> H} NMR spectrum (162 MHz, CDCl <sub>3</sub> ) of compound <b>3i</b> .....                                 | S85  |
| Figure S89. IR spectrum (KBr) of compound <b>3i</b> .....                                                                                           | S86  |
| Figure S90. MALDI-MS spectrum of compound <b>3i</b> .....                                                                                           | S86  |
| Figure S91. <sup>1</sup> H NMR spectrum (400 MHz, CDCl <sub>3</sub> ) of compound <b>3j</b> .....                                                   | S87  |
| Figure S92. <sup>13</sup> C- <sup>1</sup> H} NMR spectrum (100.6 MHz, CDCl <sub>3</sub> ) of compound <b>3j</b> .....                               | S88  |
| Figure S93. <sup>13</sup> C- <sup>1</sup> H} APT NMR spectrum (100.6 MHz, CDCl <sub>3</sub> ) of compound <b>3j</b> .....                           | S89  |
| Figure S94. <sup>31</sup> P- <sup>1</sup> H} NMR spectrum (162 MHz, CDCl <sub>3</sub> ) of compound <b>3j</b> .....                                 | S90  |
| Figure S95. IR spectrum (KBr) of compound <b>3j</b> .....                                                                                           | S91  |
| Figure S96. MALDI-MS spectrum of compound <b>3j</b> .....                                                                                           | S91  |
| Table S1. Synthesis 2-hydroxyphosphonium salts by the epoxy ring-opening reaction                                                                   |      |
| S92                                                                                                                                                 |      |
| Figure S97. Specific electroconductivity of water solutions of <b>3f-3j</b> , 4, 5 as a function of temperature                                     | S93  |
| Figure S98. Absorption profile of Sudan I in the presence of <b>3g</b> , <b>3h</b> with increasing their concentrations                             | S94  |
| Figure S99. Absorbance of Sudan I in solutions of <b>3g</b> and <b>3h</b> , and change in specific electrical conductivity of <b>3g</b> solutions   | S95  |
| Figure S100. Particle size distribution of PC/ <b>3g</b> -, RhB-loaded PC/ <b>3g</b> - and SPC/Ch/PEG/ <b>3g</b> -liposomes                         | S96  |
| Figure S101. Particle size distribution of PC/ <b>3h</b> - and SPC/Ch/PEG/ <b>3h</b> -liposomes                                                     | S97  |
| Figure S102. TEM imaging of SPC/Ch/PEG/ <b>3g</b> -liposomes                                                                                        | S98  |
| Figure S103. TEM imaging of SPC/Ch/PEG/ <b>3h</b> -liposomes                                                                                        | S99  |
| Figure S104. UV Absorbance spectra of RhB after ultracentrifugation of RhB-PC/ <b>3g</b> -liposomes                                                 | S100 |
| Figure S105. UV Absorbance spectra of RhB released from <b>3g</b> /PC-liposomes.....                                                                | S101 |
| Table S2. Cytotoxic effects (μM) and selectivity index values (SI) of <b>3a-j</b> , <b>3g</b> and <b>3h</b> -liposomes.....                         | S102 |
| Figure S106. Particle size distribution using the intensity parameter of PC-liposomes and of PC/ <b>3g</b> -liposomes (B) at different temperatures | S103 |
| Figure S107. Effects on ROS level on HuTu 80 cell line by compound <b>3g</b> .....                                                                  | S104 |

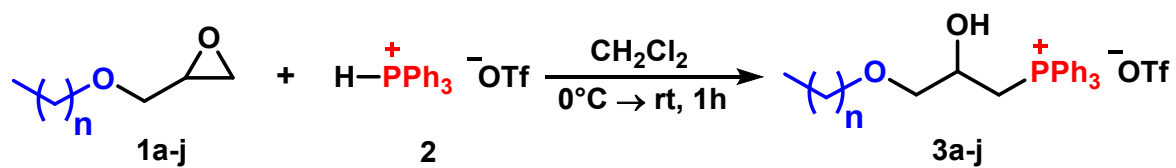

**Scheme S1.** Synthesis of amphiphilic **3a-h** with different alkyl chain lengths where  $n = 0$  (**a**), 1 (**b**), 3 (**c**), 5 (**d**), 7 (**e**), 9 (**f**), 11 (**g**), 13 (**h**), 15 (**i**), 17 (**j**).

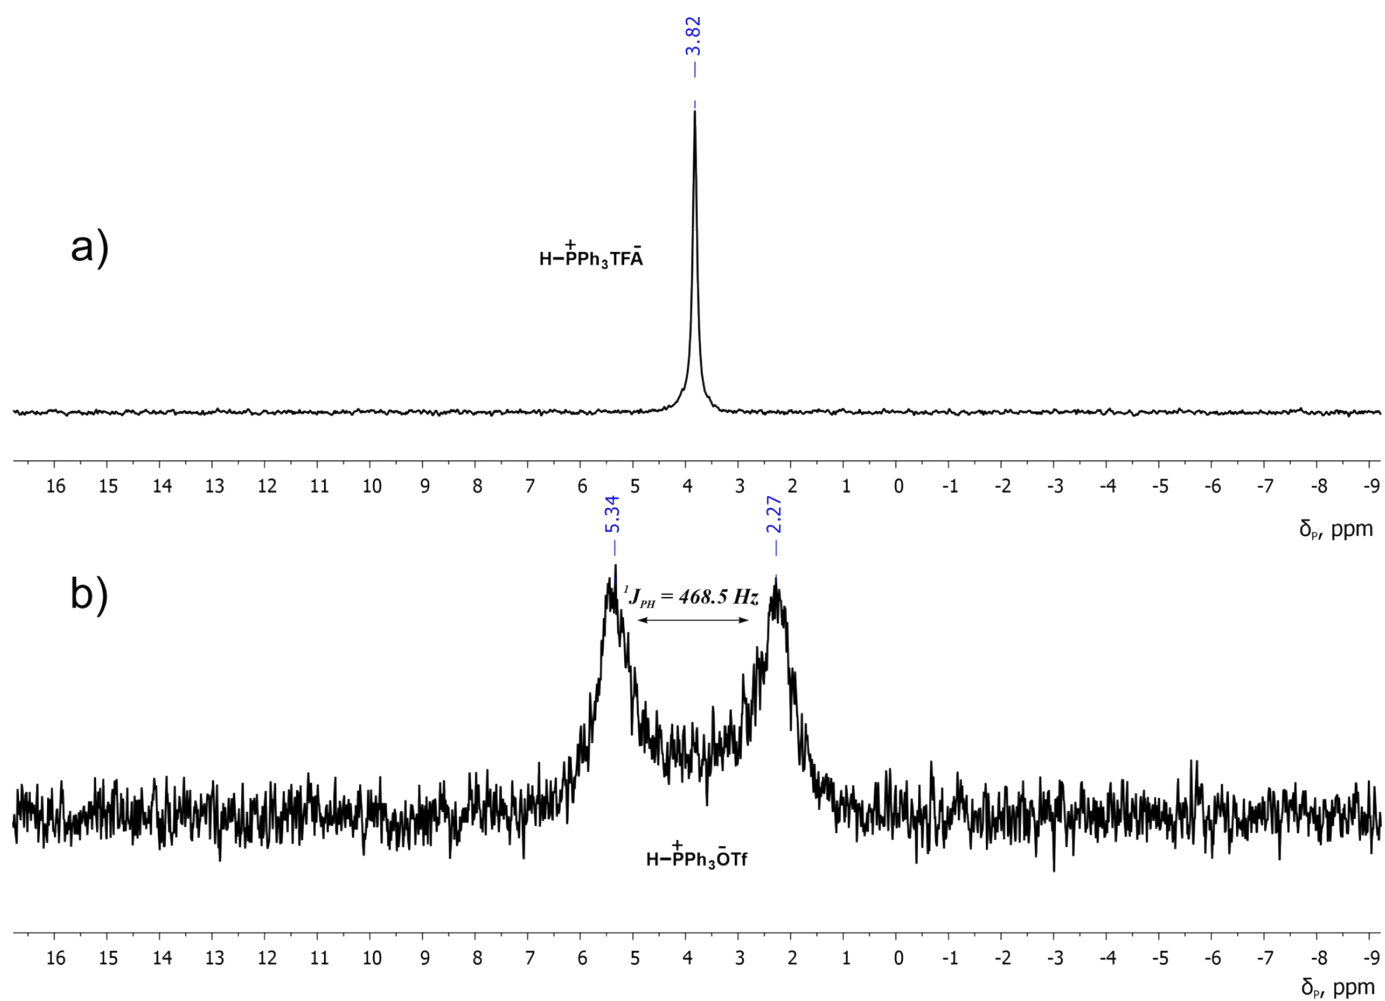

**Figure S1.**  $^{31}\text{P}\{-^1\text{H}\}$  and  $^{31}\text{P}$  NMR spectra ( $\text{CH}_2\text{Cl}_2$ , 162 MHz) of P-H-phosphonium salts:  $\text{H-P}^+\text{Ph}_3\text{CF}_3\text{SO}_3^-$  (a),  $\text{H-P}^+\text{Ph}_3\text{CF}_3\text{CO}_2^-$  (b).

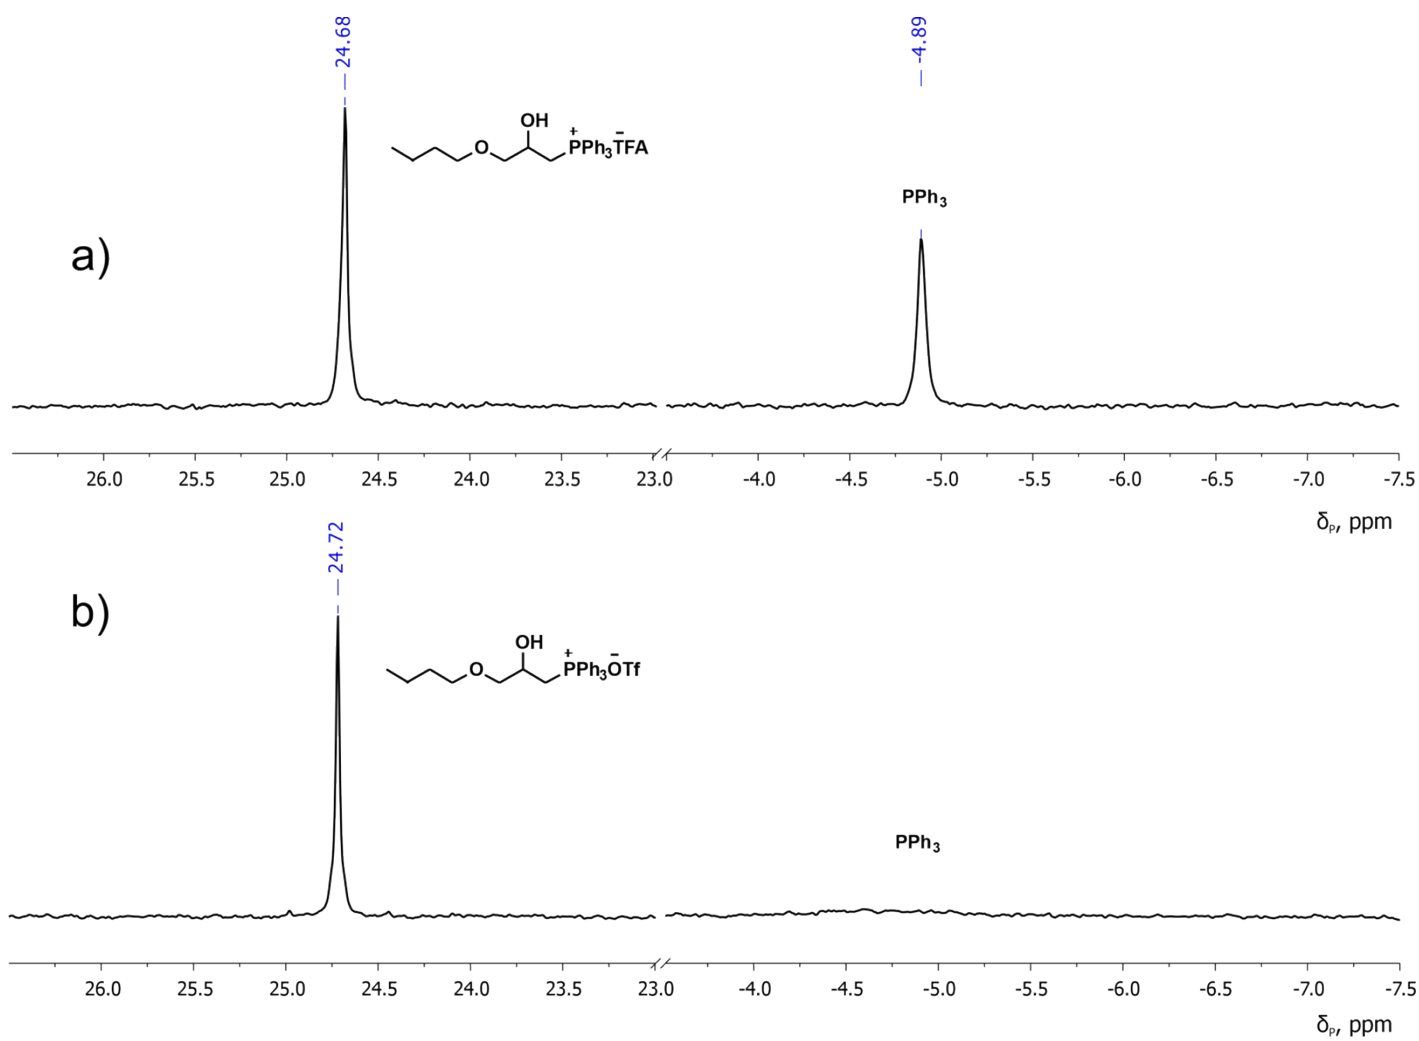

**Figure S2.**  $^{31}\text{P}$ - $\{^1\text{H}\}$  NMR spectra ( $\text{CH}_2\text{Cl}_2$ , 162 MHz) of reactions mixtures of compound **1c** with P-H-phosphonium salts:  $\text{H-P}^+\text{Ph}_3 \text{CF}_3\text{SO}_3^-$  (a),  $\text{H-P}^+\text{Ph}_3 \text{CF}_3\text{CO}_2^-$  (b).

## Characteristics of precursors of compounds 1

*1-Butoxy-3-chloropropan-2-ol*. Colorless liquid, bp 100 °C (12 mmHg), yield was 3.730 g (84 %); IR (film): 3417, 2960, 2934, 2872, 2737, 1737, 1622, 1464, 1433, 1379, 1338, 1300, 1259, 1121, 1076, 1023, 996, 963, 944, 908, 843, 751, 708, 640, 625, 574, 512, 454, 417 cm<sup>-1</sup>; <sup>1</sup>H NMR (400 MHz, CDCl<sub>3</sub>): δ = 3.97 (m, <sup>3</sup>J<sub>HH</sub> = 5.3-5.4 Hz, <sup>3</sup>J<sub>HH</sub> = 5.3-5.4 Hz, 1H, H<sup>2</sup>), 3.64 (dd, <sup>2</sup>J<sub>HH</sub> = 11.1 Hz, <sup>3</sup>J<sub>HH</sub> = 5.4 Hz, 1H, H<sup>3</sup><sub>A</sub>), 3.59 (dd, <sup>2</sup>J<sub>HH</sub> = 11.1 Hz, <sup>3</sup>J<sub>HH</sub> = 5.4 Hz, 1H, H<sup>3</sup><sub>B</sub>), 3.53 (m, <sup>3</sup>J<sub>HH</sub> = 5.1 Hz, 2H, H<sup>1</sup>), 3.48 (ddd, <sup>3</sup>J<sub>HH</sub> = 6.6 Hz, <sup>4</sup>J<sub>HH</sub> = 0.9 Hz, 2H, H<sup>1'</sup>), 2.26 (br. s, 1H, OH), 1.56 (m, <sup>3</sup>J<sub>HH</sub> = 7.6-7.7 Hz, 2H, H<sup>2'</sup>), 1.37 (m, <sup>3</sup>J<sub>HH</sub> = 7.6-7.7 Hz, 2H, H<sup>3'</sup>), 0.92 (t, <sup>3</sup>J<sub>HH</sub> = 7.4 Hz, 3H, H<sup>4'</sup>); Calculated for C<sub>7</sub>H<sub>15</sub>ClO<sub>2</sub>: C, 50.45; H, 9.07; Cl, 21.27; Found: C, 50.07; H, 9.36; Cl, 21.02.

*3-Chloro-1-hexyloxypropan-2-ol*. Colorless liquid, bp 121 °C (10 mmHg), yield was 6.388 g (82 %); IR (film): 3423, 2956, 2930, 2860, 2124, 1735, 1613, 1466, 1433, 1378, 1299, 1252, 1120, 1075, 946, 909, 843, 752, 709, 622, 573, 467 cm<sup>-1</sup>; <sup>1</sup>H NMR (400 MHz, CDCl<sub>3</sub>): δ = 3.96 (m, H<sup>2</sup>, 1H, <sup>3</sup>J<sub>HH</sub> = 5.4, <sup>3</sup>J<sub>HH</sub> = 5.4), 3.64 (dd, <sup>2</sup>J<sub>HH</sub> = 11.1 Hz, <sup>3</sup>J<sub>HH</sub> = 5.4 Hz, 1H, H<sup>3</sup><sub>A</sub>), 3.58 (dd, <sup>2</sup>J<sub>HH</sub> = 11.1 Hz, <sup>3</sup>J<sub>HH</sub> = 5.4 Hz, 1H, H<sup>3</sup><sub>B</sub>), 3.53 (m, <sup>3</sup>J<sub>HH</sub> = 5.1 Hz, 2H, H<sup>1</sup>), 3.47 (ddd, <sup>3</sup>J<sub>HH</sub> = 6.6-6.8 Hz, <sup>4</sup>J<sub>HH</sub> = 0.6-0.7 Hz, 2H, H<sup>1'</sup>), 2.28 (br. s, 1H, OH), 1.57 (m, <sup>3</sup>J<sub>HH</sub> = 6.6-6.8 Hz, <sup>3</sup>J<sub>HH</sub> = 6.6-6.8 Hz, H<sup>2'</sup>, 2H), 1.24-1.38 (m, 8H, H<sup>3'</sup>-H<sup>5'</sup>), 0.89 (t, <sup>3</sup>J<sub>HH</sub> = 7.2 Hz, 3H, H<sup>6'</sup>); Calculated for C<sub>9</sub>H<sub>19</sub>ClO<sub>2</sub>: C, 55.52; H, 9.84; Cl, 18.21; Found: C, 55.29; H, 10.05; Cl, 18.09.

*3-Chloro-1-octyloxypropan-2-ol*. Colorless liquid, bp 145 °C (10 mmHg), yield was 7.484 g (84 %); IR (film): 3417, 2926, 2856, 1731, 1633, 1465, 1433, 1378, 1299, 1257, 1120, 1075, 947, 911, 843, 752, 723, 710, 622, 573 cm<sup>-1</sup>; <sup>1</sup>H NMR (400 MHz, CDCl<sub>3</sub>): δ = 3.96 (m, <sup>3</sup>J<sub>HH</sub> = 5.4 Hz, <sup>3</sup>J<sub>HH</sub> = 5.4 Hz, 1H, H<sup>2</sup>), 3.64 (dd, <sup>2</sup>J<sub>HH</sub> = 11.1 Hz, <sup>3</sup>J<sub>HH</sub> = 5.4 Hz, 1 H, H<sup>3</sup><sub>A</sub>), 3.58 (dd, <sup>2</sup>J<sub>HH</sub> = 11.1 Hz, <sup>3</sup>J<sub>HH</sub> = 5.4 Hz, 1H, H<sup>3</sup><sub>B</sub>), 3.52 (m, <sup>3</sup>J<sub>HH</sub> = 5.1 Hz, 2H, H<sup>1</sup>), 3.47 (m, <sup>3</sup>J<sub>HH</sub> = 6.6-6.8 Hz, <sup>4</sup>J<sub>HH</sub> = 0.6-0.7 Hz, 2H, H<sup>1'</sup>), 2.33 (br. s, 1H, OH), 1.56 (m, <sup>3</sup>J<sub>HH</sub> = 6.6-6.8 Hz, <sup>3</sup>J<sub>HH</sub> = 6.6-6.8 Hz, 2H, H<sup>2'</sup>), 1.19-1.39 (m, 12H, H<sup>3'</sup>-H<sup>7'</sup>), 0.88 (t, <sup>3</sup>J<sub>HH</sub> = 7.2 Hz, 3H, H<sup>8'</sup>); Calculated for C<sub>11</sub>H<sub>23</sub>ClO<sub>2</sub>: C, 59.31; H, 10.41; Cl, 15.92; Found: C, 59.12; H, 10.52; Cl, 15.65.

*3-Chloro-1-decyloxypropan-2-ol*. Colorless liquid, bp 130 °C (0.1 mmHg.), yield was 8.224 g (82 %); IR (film): 3418, 2954, 2925, 2855, 1598, 1465, 1430, 1378, 1299, 1260, 1120, 1074, 945, 910, 843, 753, 722, 624, 572 cm<sup>-1</sup>; <sup>1</sup>H NMR (400 MHz, CDCl<sub>3</sub>): δ = 3.97 (m, <sup>3</sup>J<sub>HH</sub> = 5.0-5.6 Hz, 1H, H<sup>2</sup>), 3.60 (dd, <sup>2</sup>J<sub>HH</sub> = 11.1 Hz, <sup>3</sup>J<sub>HH</sub> = 5.7 Hz, 1H, H<sup>3</sup><sub>A</sub>), 3.64 (dd, <sup>2</sup>J<sub>HH</sub> = 11.1 Hz, <sup>3</sup>J<sub>HH</sub> = 5.7 Hz, 1H, H<sup>3</sup><sub>B</sub>), 3.53 (m, 2 H, H<sup>1</sup>), 3.48 (m, <sup>2</sup>J<sub>HH</sub> = 10.4 Hz, 2H, H<sup>1</sup>), 2.52 (br.s, 1H, OH), 1.57 (m, <sup>3</sup>J<sub>HH</sub> = 6.6-6.8 Hz, <sup>3</sup>J<sub>HH</sub> = 6.6-6.8 Hz, 2H, H<sup>2'</sup>), 1.28-1.31 (m, 14H, H<sup>3'</sup>-H<sup>9'</sup>), 1.22 (t, <sup>3</sup>J<sub>HH</sub> = 7.0 Hz, 3H, H<sup>10'</sup>); Calculated for C<sub>13</sub>H<sub>27</sub>ClO<sub>2</sub>: C, 62.25; H, 10.85; Cl, 14.13; Found: C, 61.91; H, 11.21; Cl, 14.0.

*3-Chloro-1-dodecyloxypropan-2-ol*. Colorless liquid, bp 145 °C (0.1 mmHg), yield was 9.034 g (81 %); IR (film): 3418, 2924, 2854, 2687, 1727, 1633, 1466, 1377, 1299, 1254, 1121, 1075, 947, 911, 844, 753, 722, 624, 573 cm<sup>-1</sup>; <sup>1</sup>H NMR (400 MHz, CDCl<sub>3</sub>): δ = 3.96 (m, <sup>3</sup>J<sub>HH</sub> = 5.5 Hz, <sup>3</sup>J<sub>HH</sub> = 5.5 Hz, 1H, H<sup>2</sup>), 3.64 (dd, <sup>2</sup>J<sub>HH</sub> = 11.0 Hz, <sup>3</sup>J<sub>HH</sub> = 5.5 Hz, H<sup>3</sup><sub>A</sub>, 1H), 3.59 (dd, <sup>2</sup>J<sub>HH</sub> = 11.0 Hz, <sup>3</sup>J<sub>HH</sub> = 5.5 Hz, 1H, H<sup>3</sup><sub>B</sub>), 3.53 (m, <sup>3</sup>J<sub>HH</sub> = 5.5 Hz, 2H, H<sup>1</sup>), 3.48 (m, <sup>3</sup>J<sub>HH</sub> = 6.6-6.8 Hz, <sup>4</sup>J<sub>HH</sub> = 1.6-1.7 Hz, 2H, H<sup>1'</sup>), 2.36 (br. s, 1H, OH), 1.57

(m,  $^3J_{\text{HH}} = 6.6\text{-}6.8$  Hz,  $^3J_{\text{HH}} = 6.6\text{-}6.8$  Hz, 2H, H<sup>2'</sup>), 1.22-1.36 (m, 18H, H<sup>3'</sup>-H<sup>11'</sup>), 0.88 (t,  $^3J_{\text{HH}} = 7.2$  Hz, 3H, H<sup>12'</sup>); Calculated for C<sub>15</sub>H<sub>31</sub>ClO<sub>2</sub>: C, 64.61; H, 11.21; Cl, 12.71; Found: C, 64.31; H, 11.43; Cl, 12.42.

*3-Chloro-1-tetradecyloxypropan-2-ol*. Colorless liquid, bp 174 °C (0.1 mmHg), yield was 9.947 g (81 %); IR (film): 3409, 2923, 2853, 2681, 1726, 1710, 1640, 1580, 1466, 1377, 1301, 1261, 1121, 1075, 946, 910, 844, 753, 722, 622, 573, 528, 513, 452 cm<sup>-1</sup>; <sup>1</sup>H NMR (400 MHz, CDCl<sub>3</sub>): δ = 3.97 (m,  $^3J_{\text{HH}} = 5.5$  Hz,  $^3J_{\text{HH}} = 5.5$  Hz, 1H, H<sup>2</sup>), 3.64 (dd,  $^2J_{\text{HH}} = 11.0$  Hz,  $^3J_{\text{HH}} = 5.5$  Hz, 1H, H<sup>3</sup><sub>A</sub>), 3.59 (dd,  $^2J_{\text{HH}} = 11.0$  Hz,  $^3J_{\text{HH}} = 5.5$  Hz, 1H, H<sup>3</sup><sub>B</sub>), 3.53 (m,  $^3J_{\text{HH}} = 5.5$  Hz, 2H, H<sup>1</sup>), 3.47 (m,  $^3J_{\text{HH}} = 6.6\text{-}6.8$  Hz,  $^4J_{\text{HH}} = 1.6\text{-}1.7$  Hz, H<sup>1'</sup>, 2 H), 2.13 (br. s, 1H, OH), 1.57 (m,  $^3J_{\text{HH}} = 6.6\text{-}6.8$  Hz,  $^3J_{\text{HH}} = 6.6\text{-}6.8$  Hz, 2 H, H<sup>2'</sup>), 1.19-1.38 (m, 22H, H<sup>3'</sup>-H<sup>13'</sup>), 0.88 (t,  $^3J_{\text{HH}} = 7.2$  Hz, 3H, H<sup>14'</sup>); Calculated for C<sub>17</sub>H<sub>35</sub>ClO<sub>2</sub>: C, 66.53; H, 11.50; Cl, 11.55; Found: C, 66.16; H, 11.80; Cl, 11.35.

*3-Chloro-1-hexadecyloxypropan-2-ol*. Purified by column chromatography using a linear gradient elution system from 100 % to 10 % (by volume) hexane-diethyl ether. Colorless liquid, TLC  $R_f = 0.26$  (hexanes/Et<sub>2</sub>O = 7/ 3), yield was 11.826 g (89 %); <sup>1</sup>H NMR (400 MHz, CDCl<sub>3</sub>): δ = 3.97 (m,  $^3J_{\text{HH}} = 5.5$  Hz,  $^3J_{\text{HH}} = 5.4$  Hz, 1 H, , H<sup>2</sup>), 3.64 (dd,  $^2J_{\text{HH}} = 11.0$  Hz,  $^3J_{\text{HH}} = 5.5$  Hz, 1 H, H<sup>3</sup><sub>A</sub>), 3.59 (dd,  $^2J_{\text{HH}} = 11.0$  Hz,  $^3J_{\text{HH}} = 5.5$  Hz, 1 H, H<sup>3</sup><sub>B</sub>), 3.53 (m,  $^3J_{\text{HH}} = 5.1$  Hz, 2 H, H<sup>1</sup>), 3.47 (m,  $^3J_{\text{HH}} = 6.6\text{-}6.8$  Hz,  $^4J_{\text{HH}} = 1.6\text{-}1.7$  Hz, 2 H, H<sup>1'</sup>), 2.16 (br. s, 1 H, OH), 1.57 (m,  $^3J_{\text{HH}} = 6.6\text{-}6.8$  Hz,  $^3J_{\text{HH}} = 6.6\text{-}6.8$  Hz, 2 H, H<sup>2'</sup>), 1.20-1.38 (m, 26 H, H<sup>3'</sup>-H<sup>15'</sup>), 0.88 (t,  $^3J_{\text{HH}} = 7.2$  Hz, 3 H, H<sup>16'</sup>); Calculated for C<sub>19</sub>H<sub>39</sub>ClO<sub>2</sub>: C, 68.13; H, 11.74; Cl, 10.58; Found: C, 67.95; H, 11.91; Cl, 10.34.

*3-Chloro-1-octadecyloxypropan-2-ol*. Purified by column chromatography using a linear gradient elution system from 100 % to 10 % (by volume) hexane-diethyl ether. Colorless liquid, TLC  $R_f = 0.33$  (hexanes/Et<sub>2</sub>O = 7/3), yield was 12.923 g (89 %); <sup>1</sup>H NMR (400 MHz, CDCl<sub>3</sub>): δ = 3.97 (m,  $^3J_{\text{HH}} = 5.5$  Hz,  $^3J_{\text{HH}} = 5.4$  Hz, 1H, H<sup>2</sup>), 3.64 (dd,  $^2J_{\text{HH}} = 11.0$  Hz,  $^3J_{\text{HH}} = 5.5$  Hz, 1H, H<sup>3</sup><sub>A</sub>), 3.59 (dd,  $^2J_{\text{HH}} = 11.0$  Hz,  $^3J_{\text{HH}} = 5.5$  Hz, 1H, H<sup>3</sup><sub>B</sub>), 3.53 (m,  $^3J_{\text{HH}} = 5.1$  Hz, 2H, H<sup>1</sup>), 3.47 (m, H<sup>1'</sup>, 2H,  $^3J_{\text{HH}} = 6.6\text{-}6.8$ ,  $^4J_{\text{HH}} = 1.6\text{-}1.7$  Hz), 2.16 (br. s, OH, 1H), 1.57 (m,  $^3J_{\text{HH}} = 6.6\text{-}6.8$  Hz,  $^3J_{\text{HH}} = 6.6\text{-}6.8$  Hz, 2H, H<sup>2'</sup>), 1.41-1.20 (m, 30H, H<sup>3'</sup>-H<sup>15'</sup>), 0.88 (t,  $^3J_{\text{HH}} = 7.2$  Hz, 3H, H<sup>18'</sup>); Calculated for C<sub>21</sub>H<sub>43</sub>ClO<sub>2</sub>: C, 69.48; H, 11.94; Cl, 9.77; Found: C, 69.15; H, 12.19; Cl, 9.60.

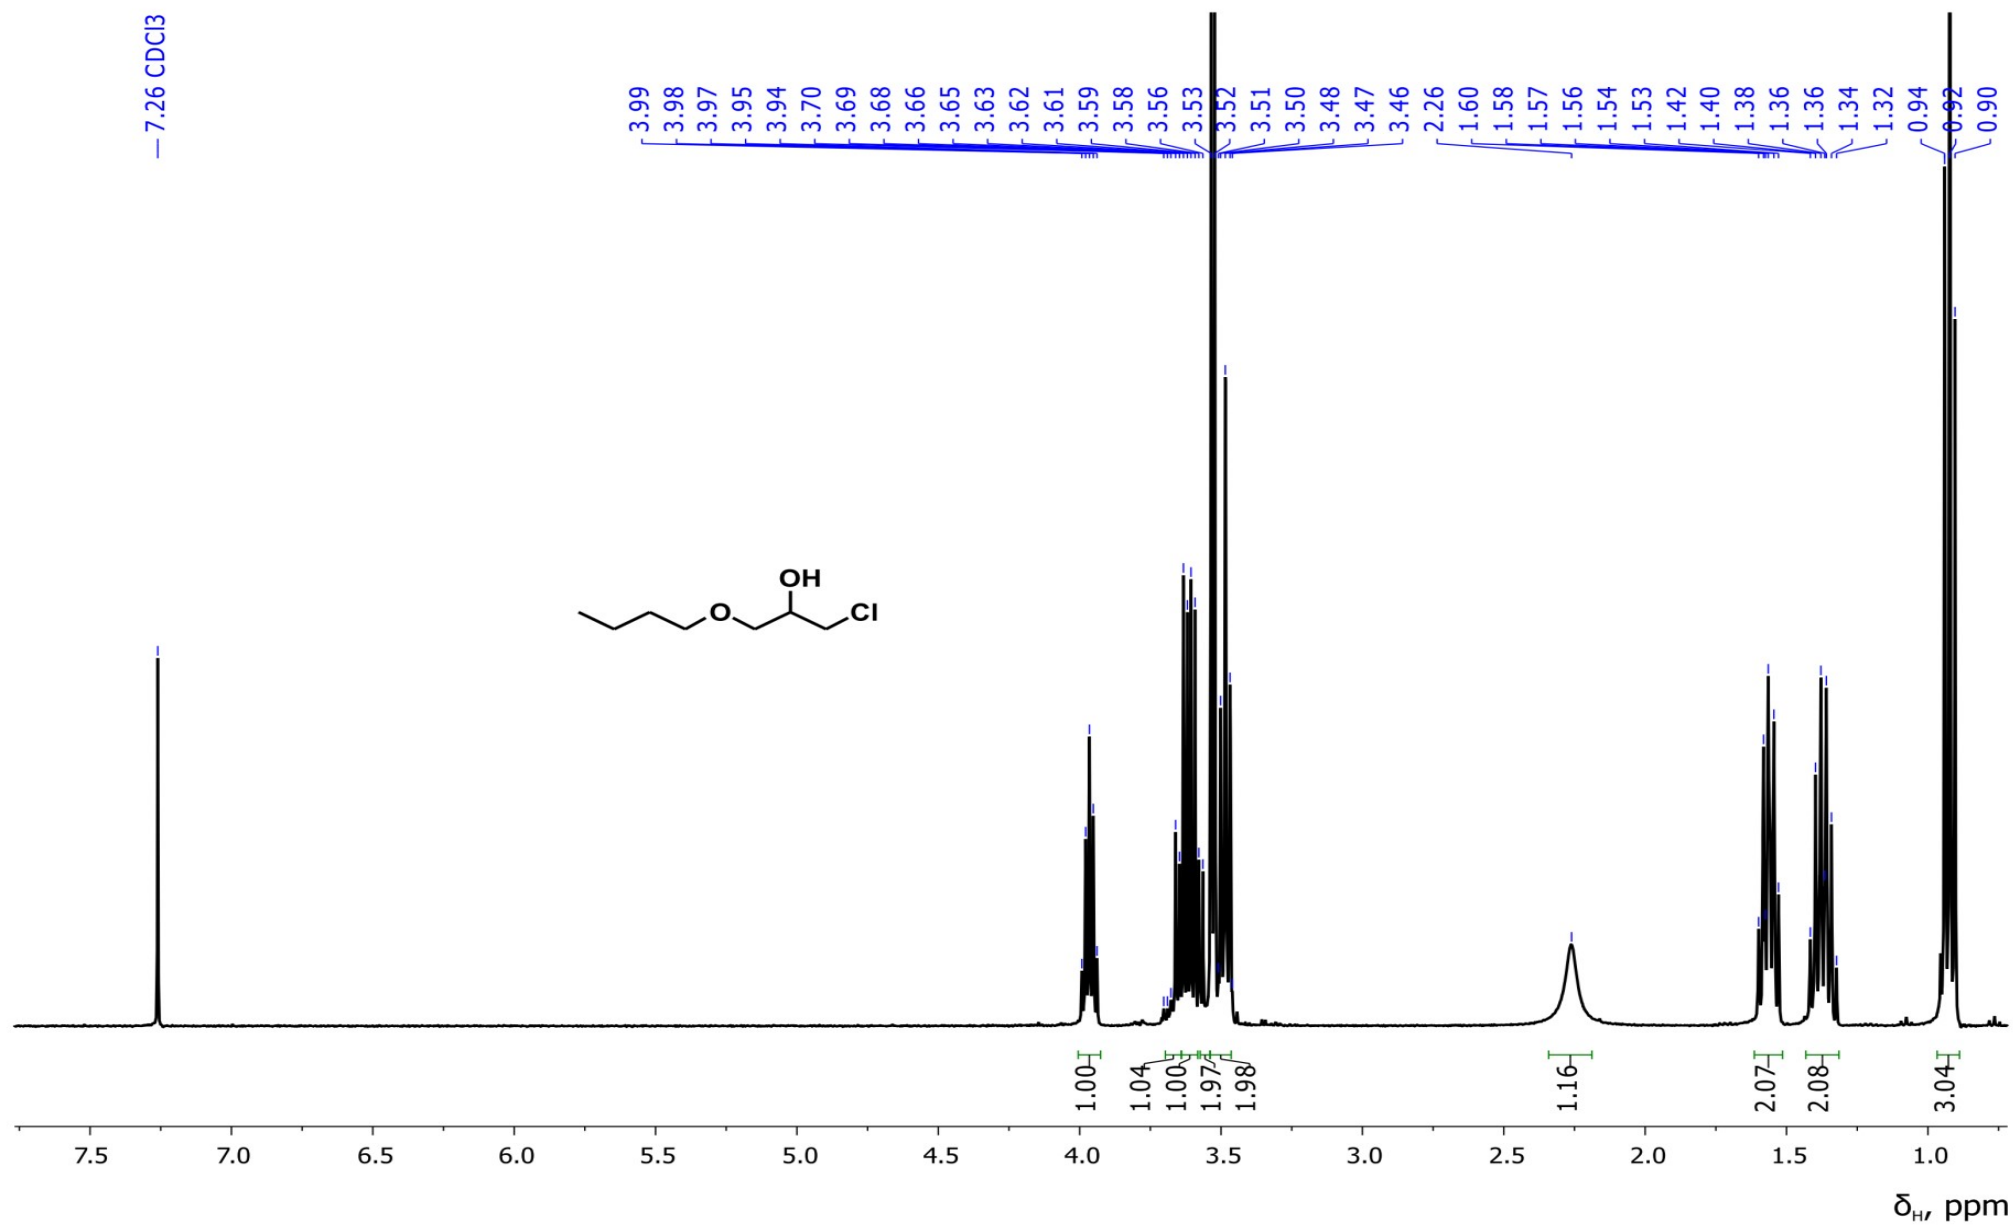

Figure S3. <sup>1</sup>H NMR (400 MHz, CDCl<sub>3</sub>) spectrum of 3-chloro-1-butoxypropan-2-ol.

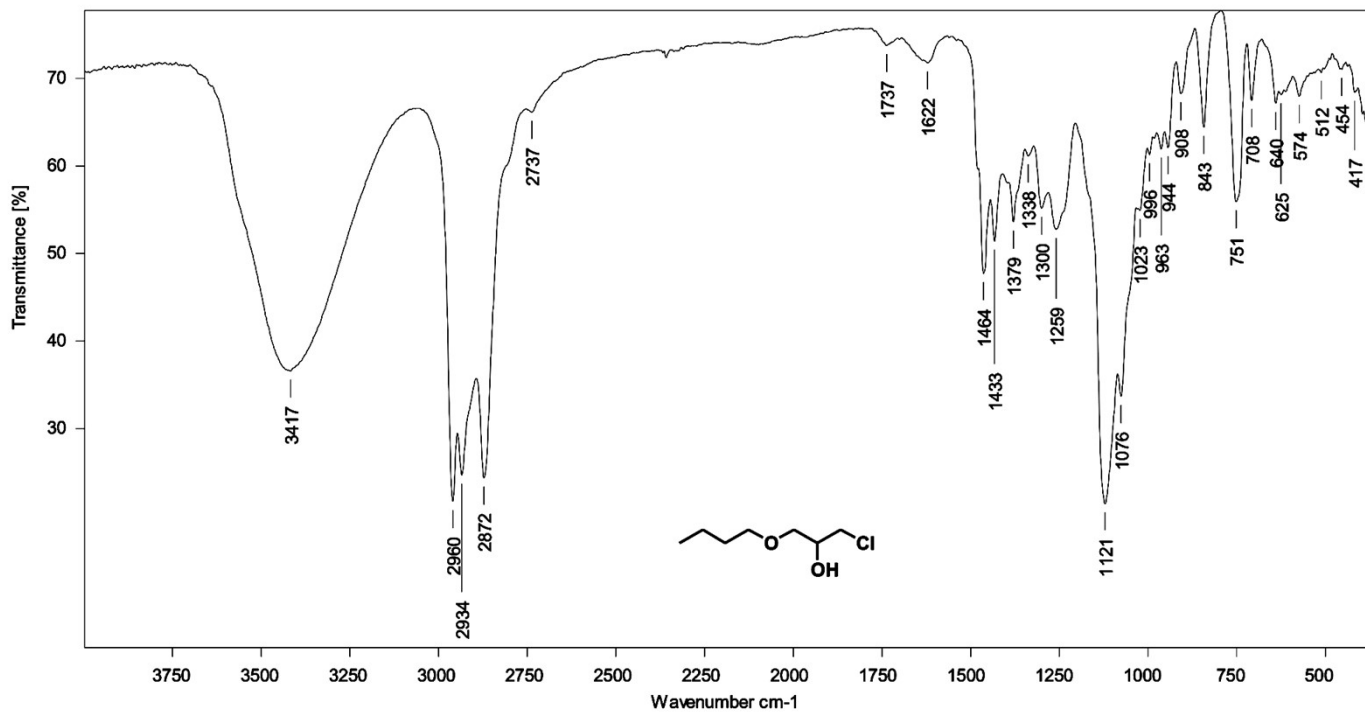

Figure S4. IR spectrum (film) of 3-chloro-1-butoxypropan-2-ol.

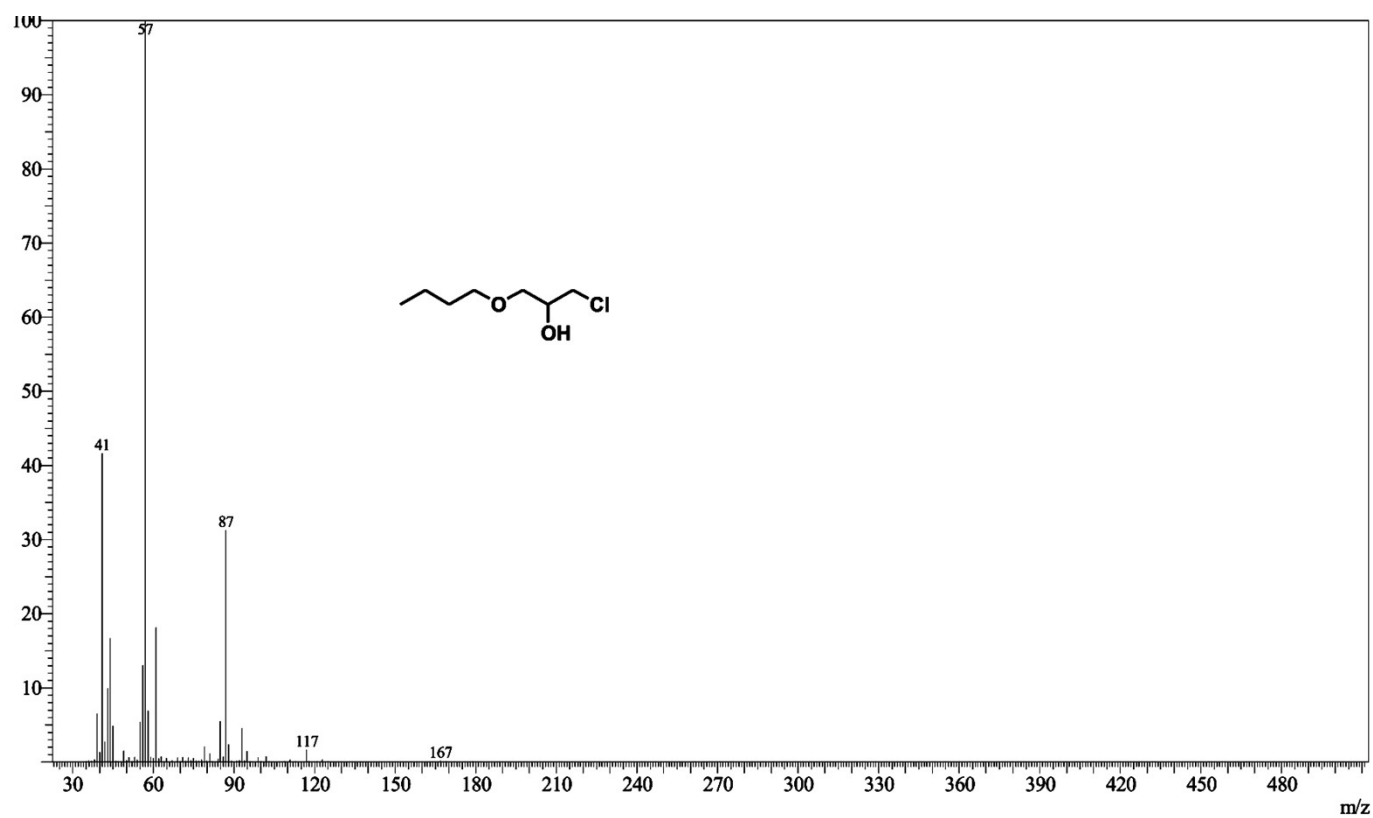

Figure S5. EI-MS spectrum of 3-chloro-1-butoxypropan-2-ol.

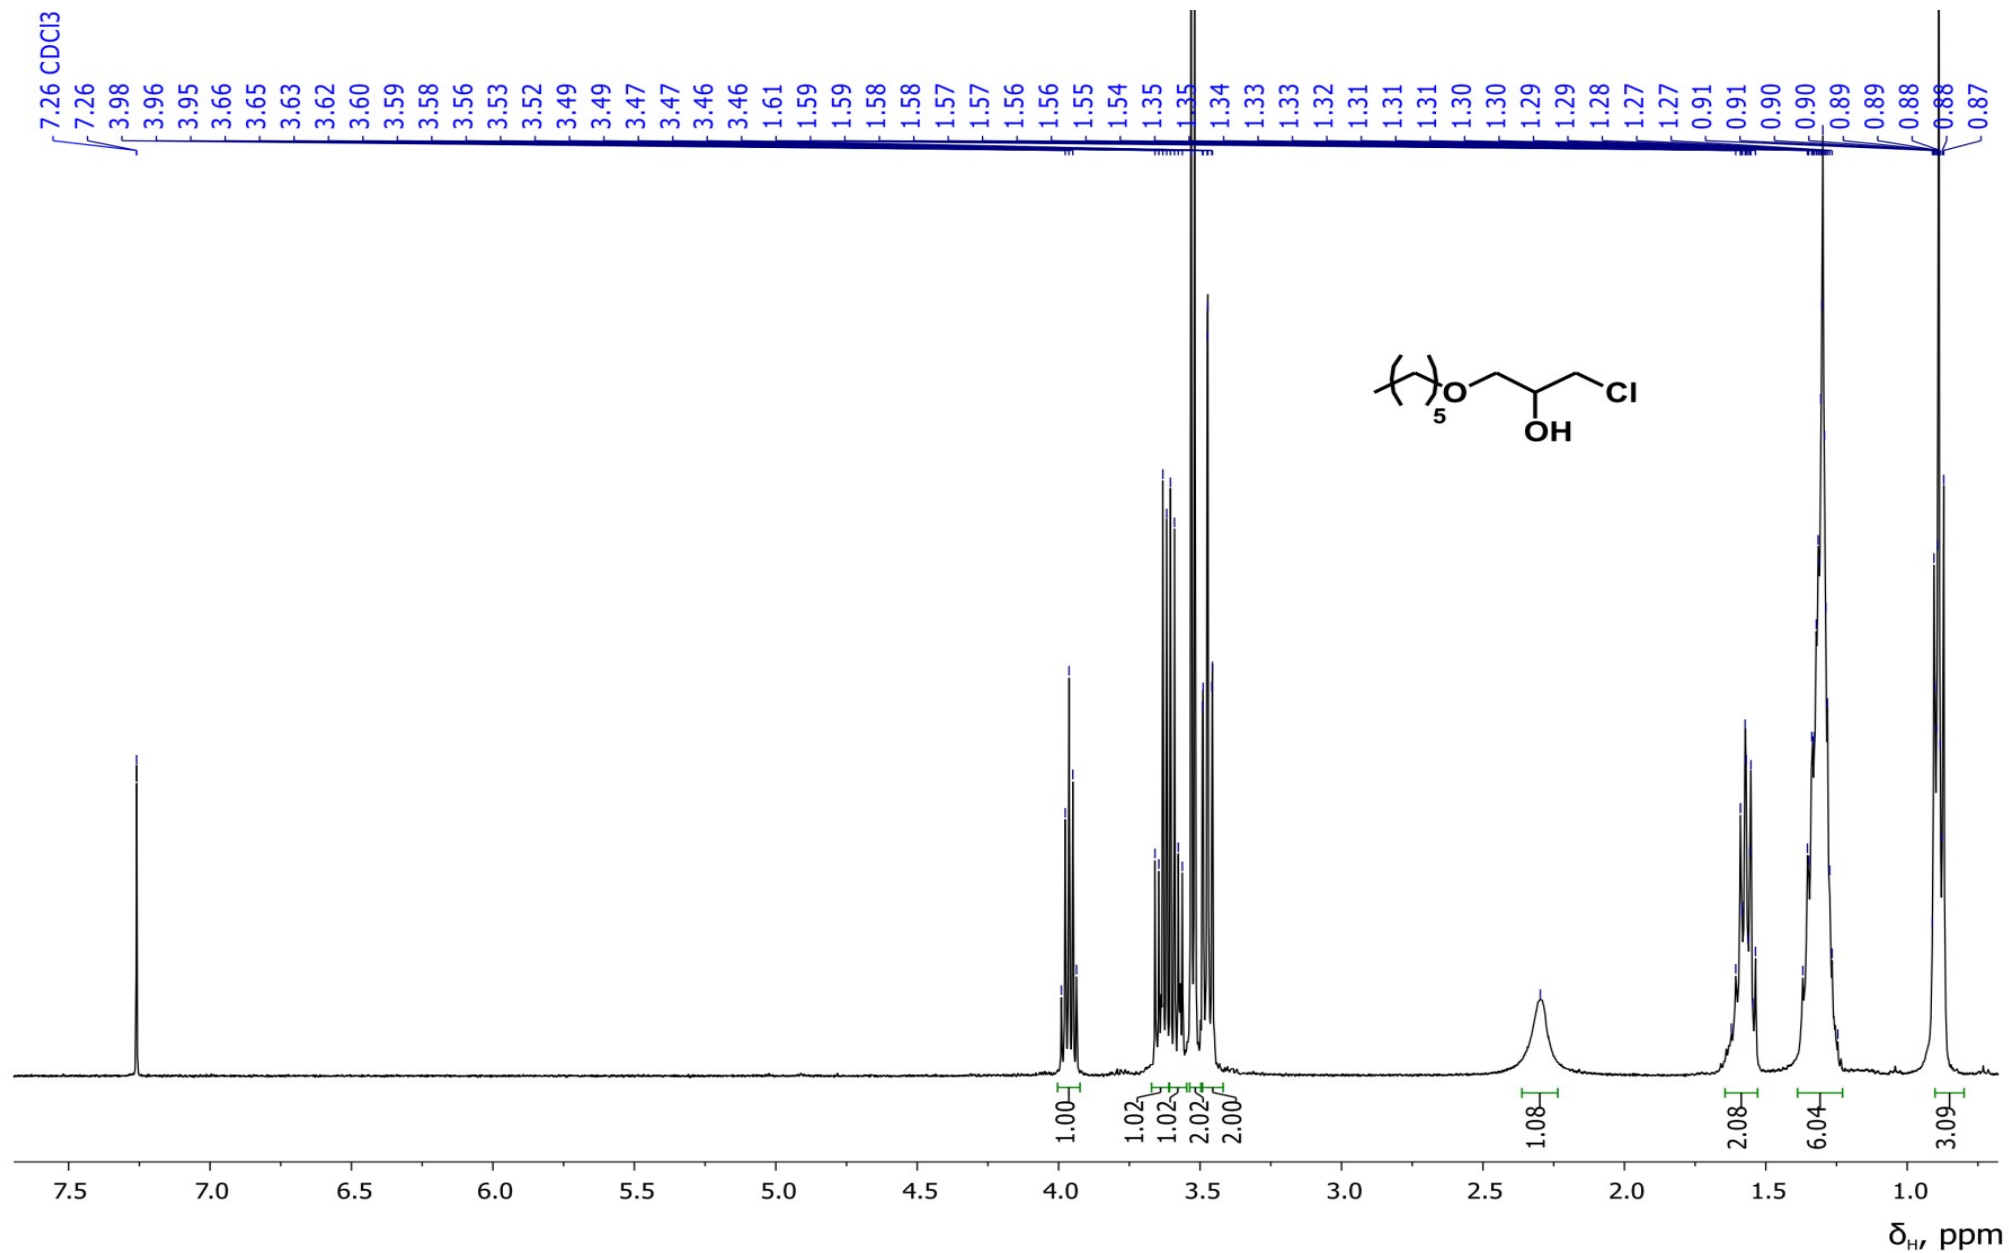

**Figure S6.** <sup>1</sup>H NMR spectrum (400 MHz, CDCl<sub>3</sub>) of 3-chloro-1-hexyloxypropan-2-ol.

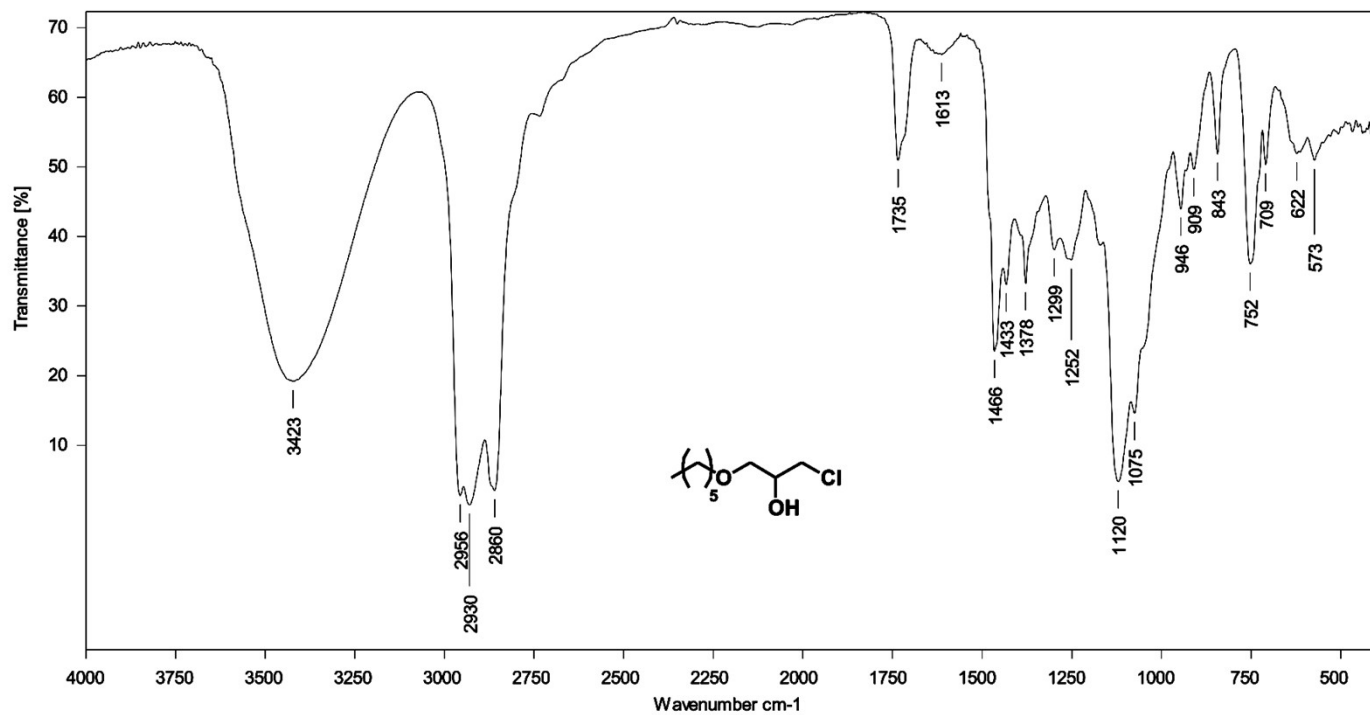

Figure S7. IR spectrum (film) of 3-chloro-1-hexyloxypropan-2-ol.

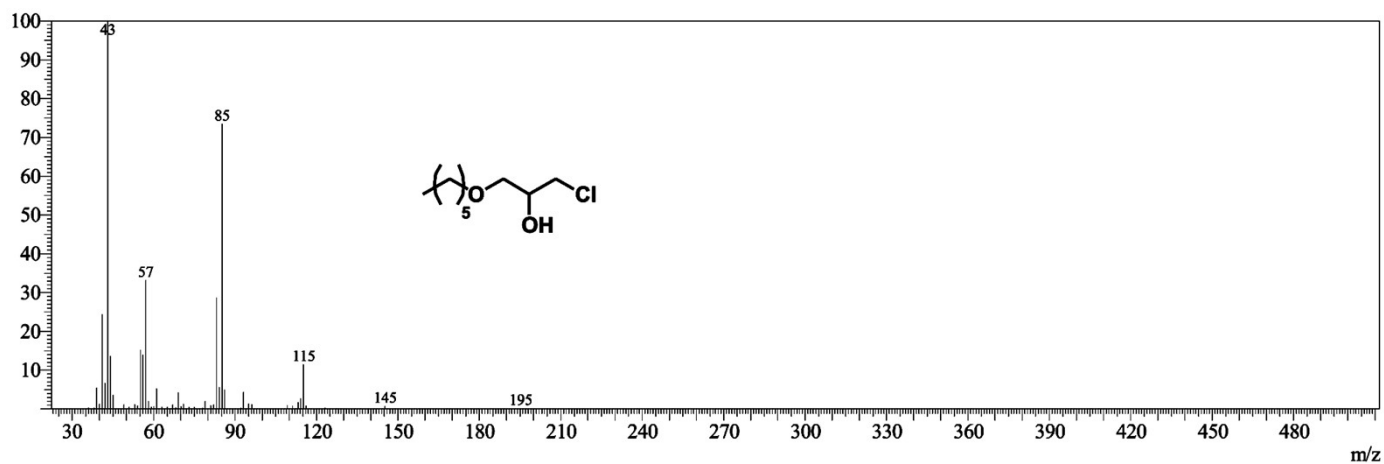

Figure S8. EI-MS spectrum of 3-chloro-1-hexyloxypropan-2-ol.

— 7.26 CDCl<sub>3</sub>

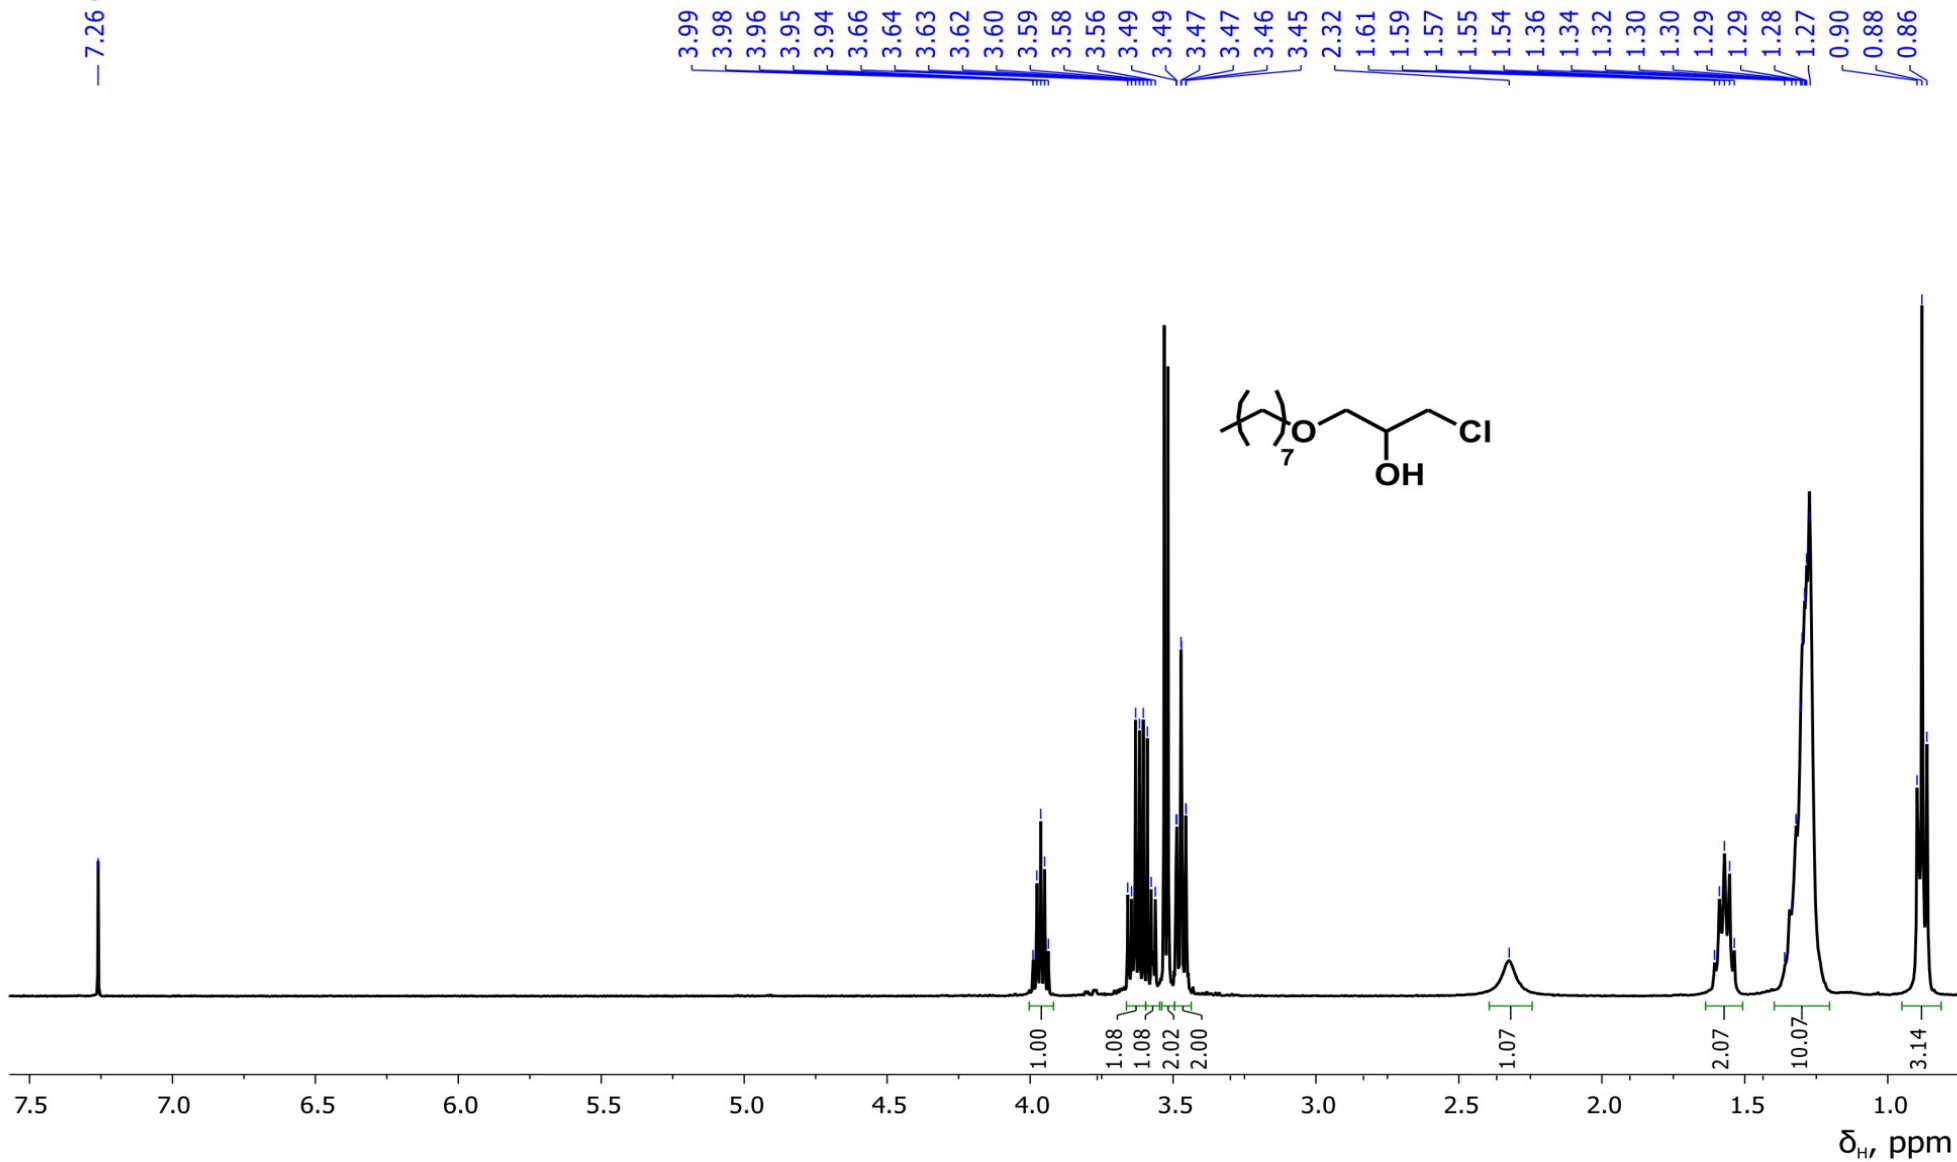

Figure S9. <sup>1</sup>H NMR spectrum (400 MHz, CDCl<sub>3</sub>) of 3-chloro-1-octyloxypropan-2-ol.

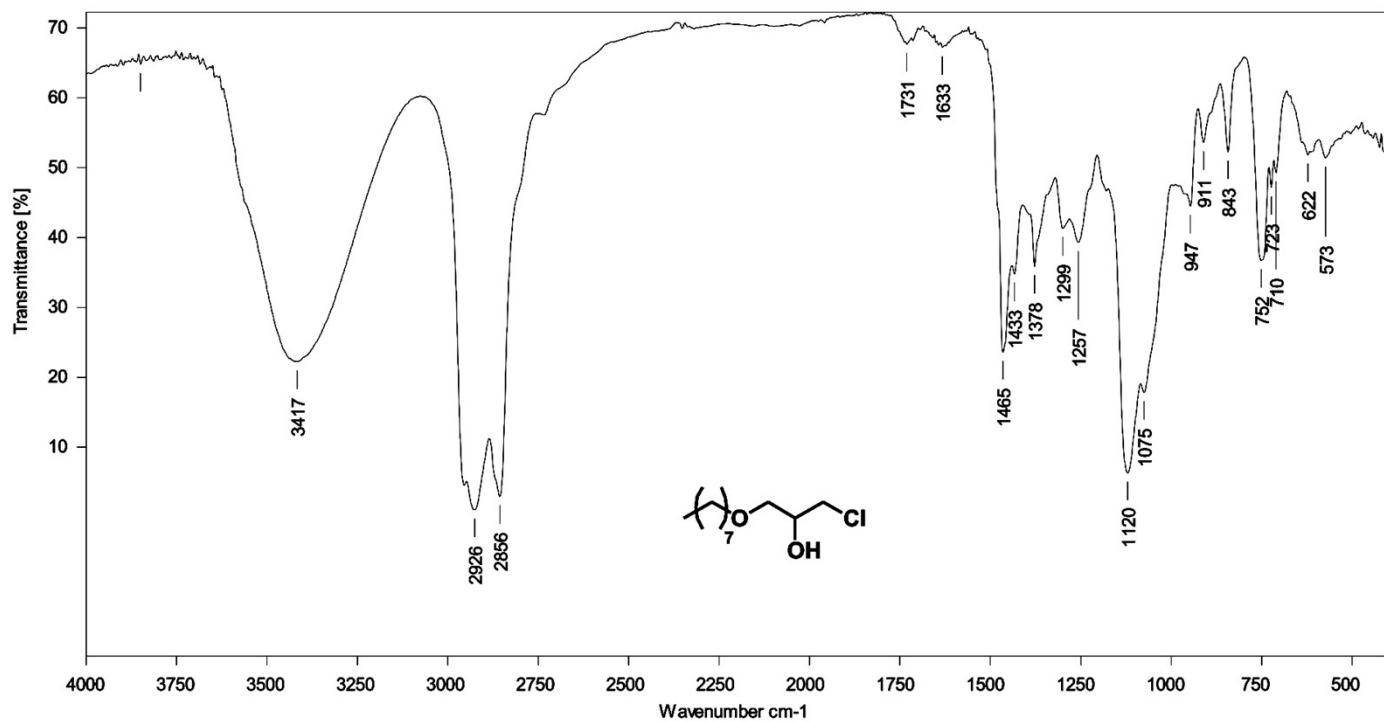

Figure S10. IR spectrum (film) of 3-chloro-1-octyloxypropan-2-ol.

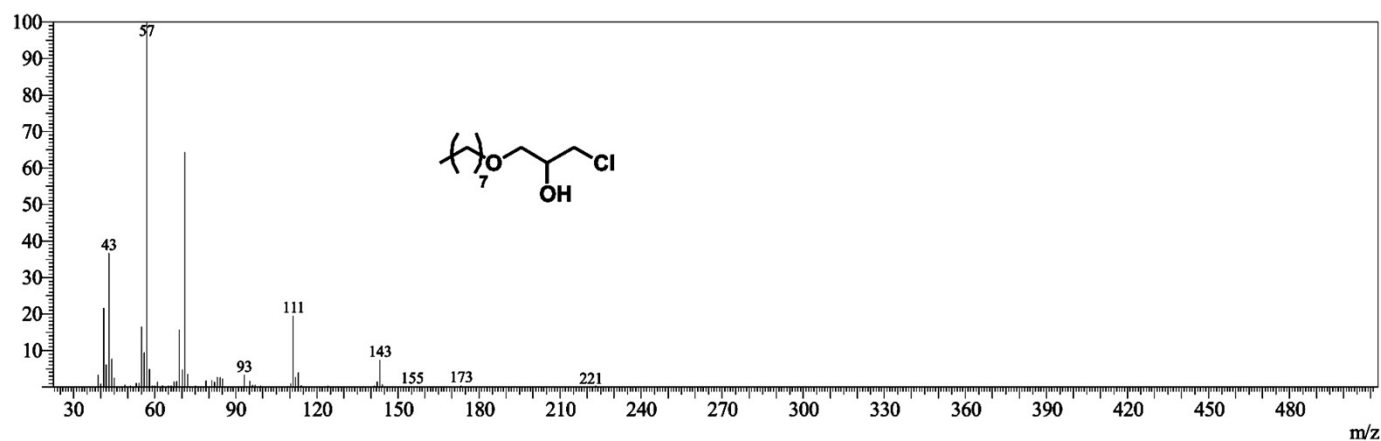

Figure S11. EI-MS spectrum of compound 3-chloro-1-octyloxypropan-2-ol.

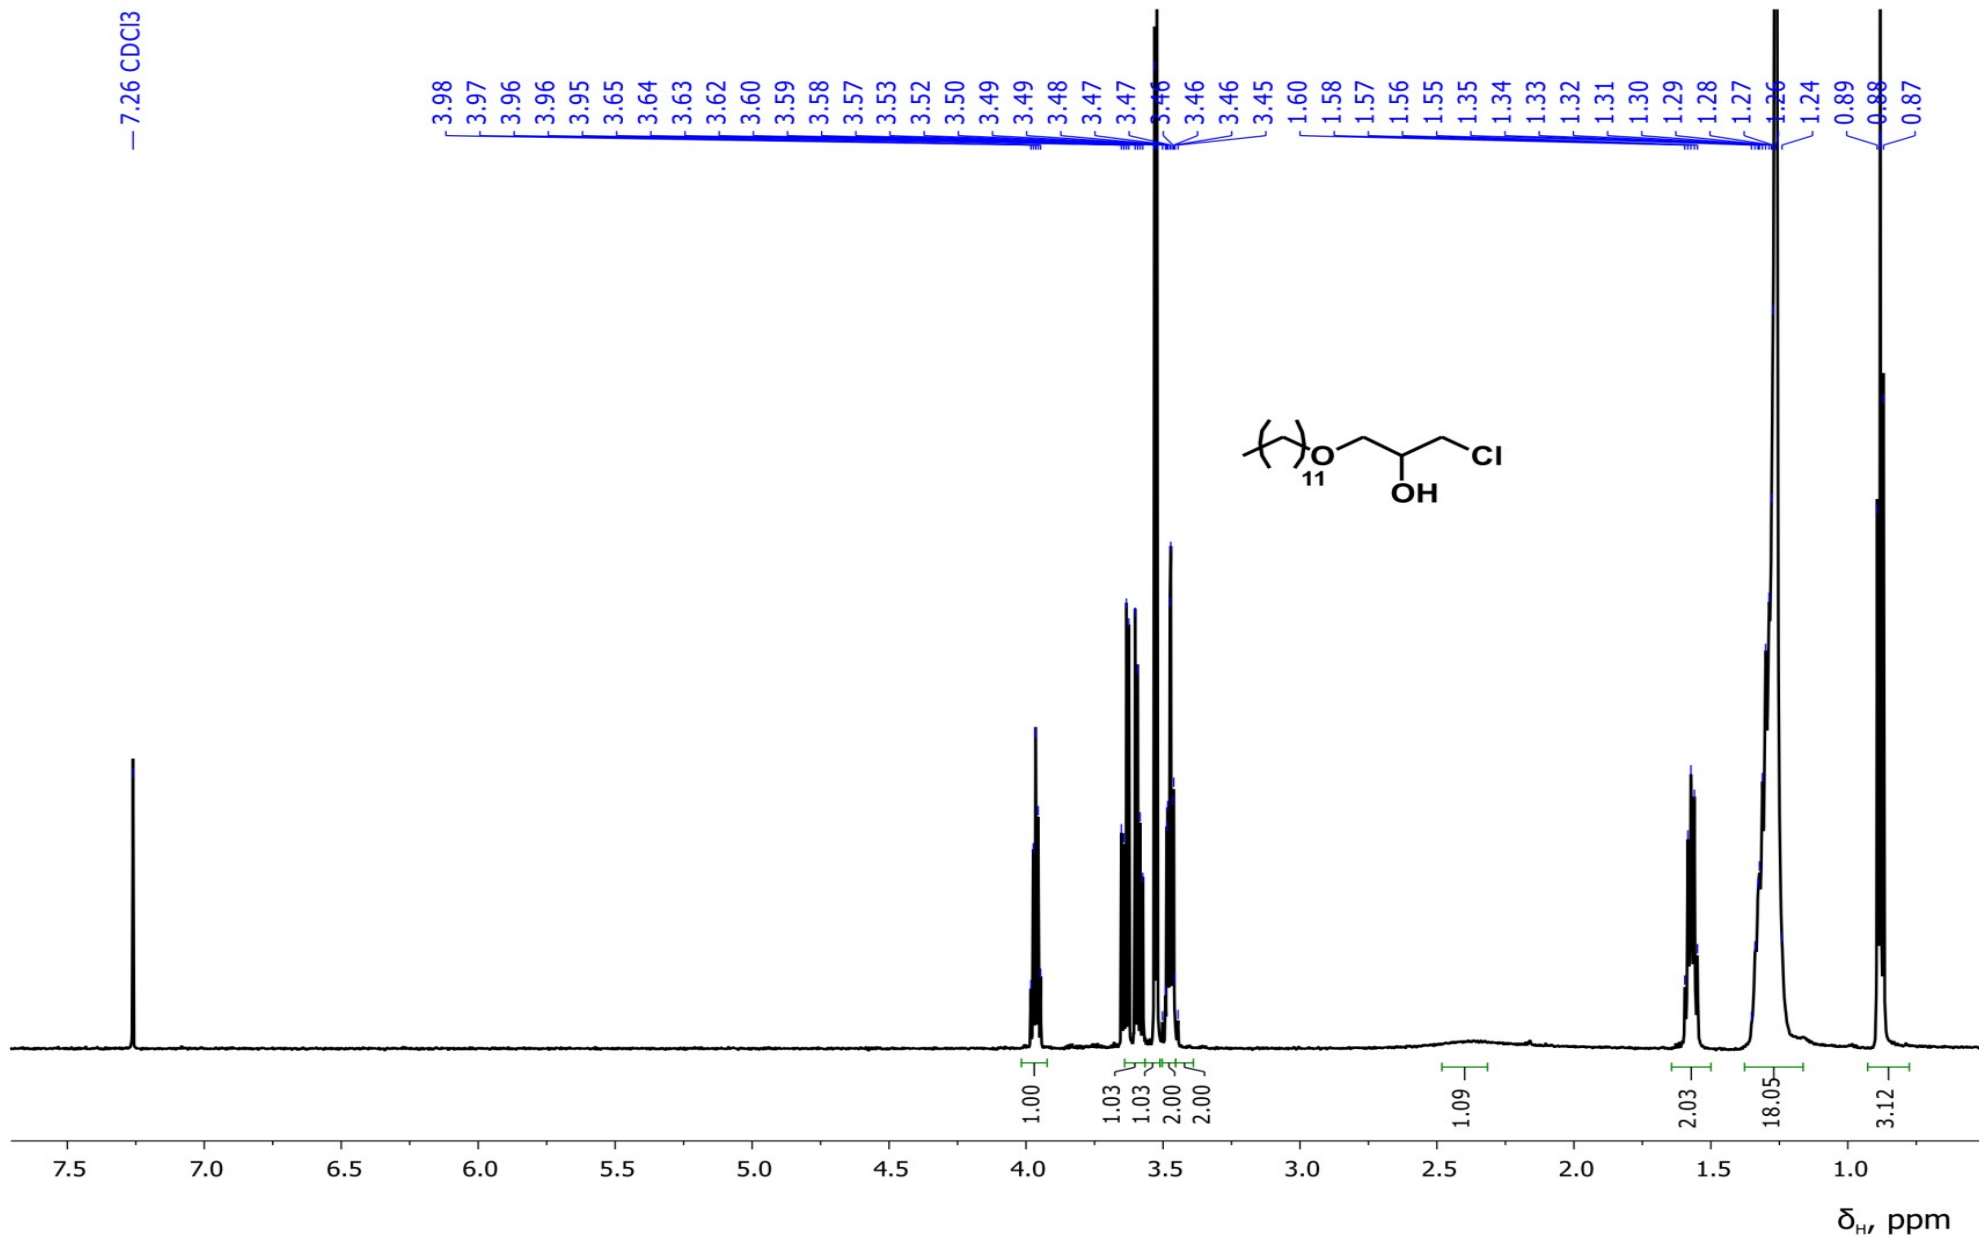

**Figure S12.** <sup>1</sup>H NMR spectrum (400 MHz, CDCl<sub>3</sub>) of 3-chloro-1-dodecyloxypropan-2-ol.

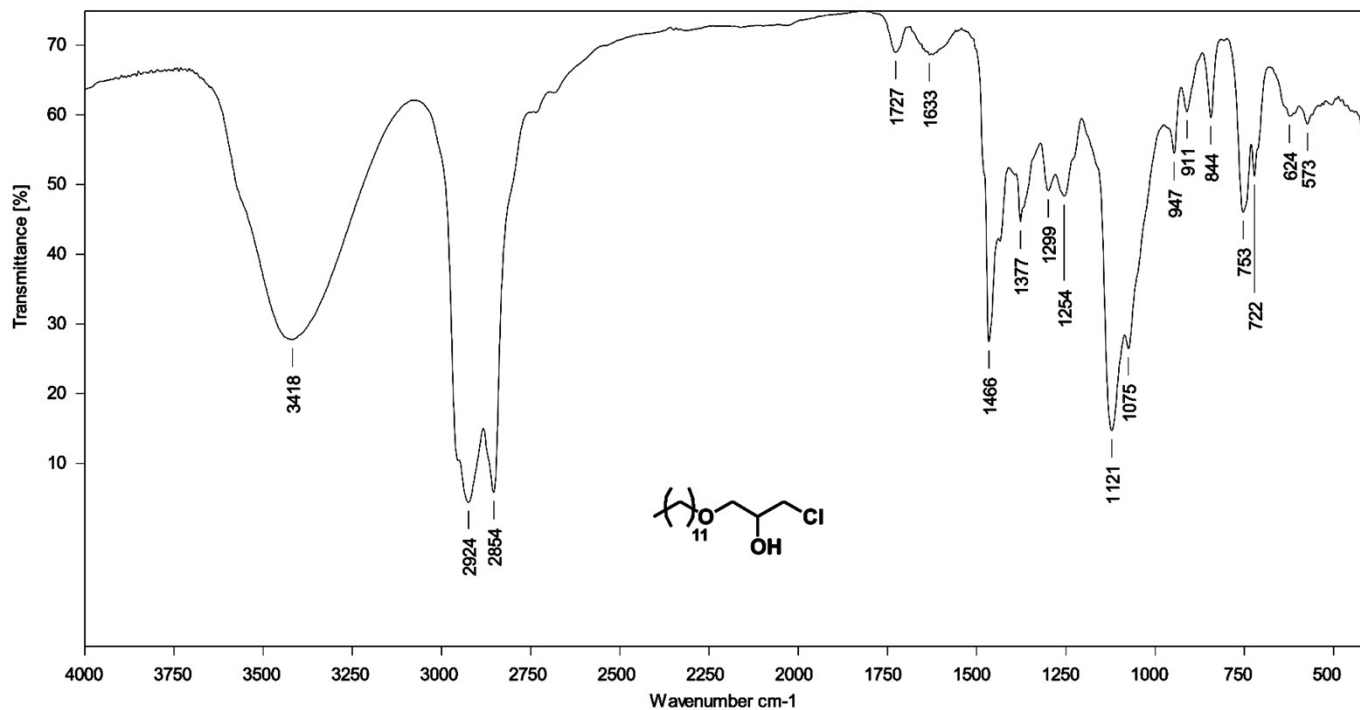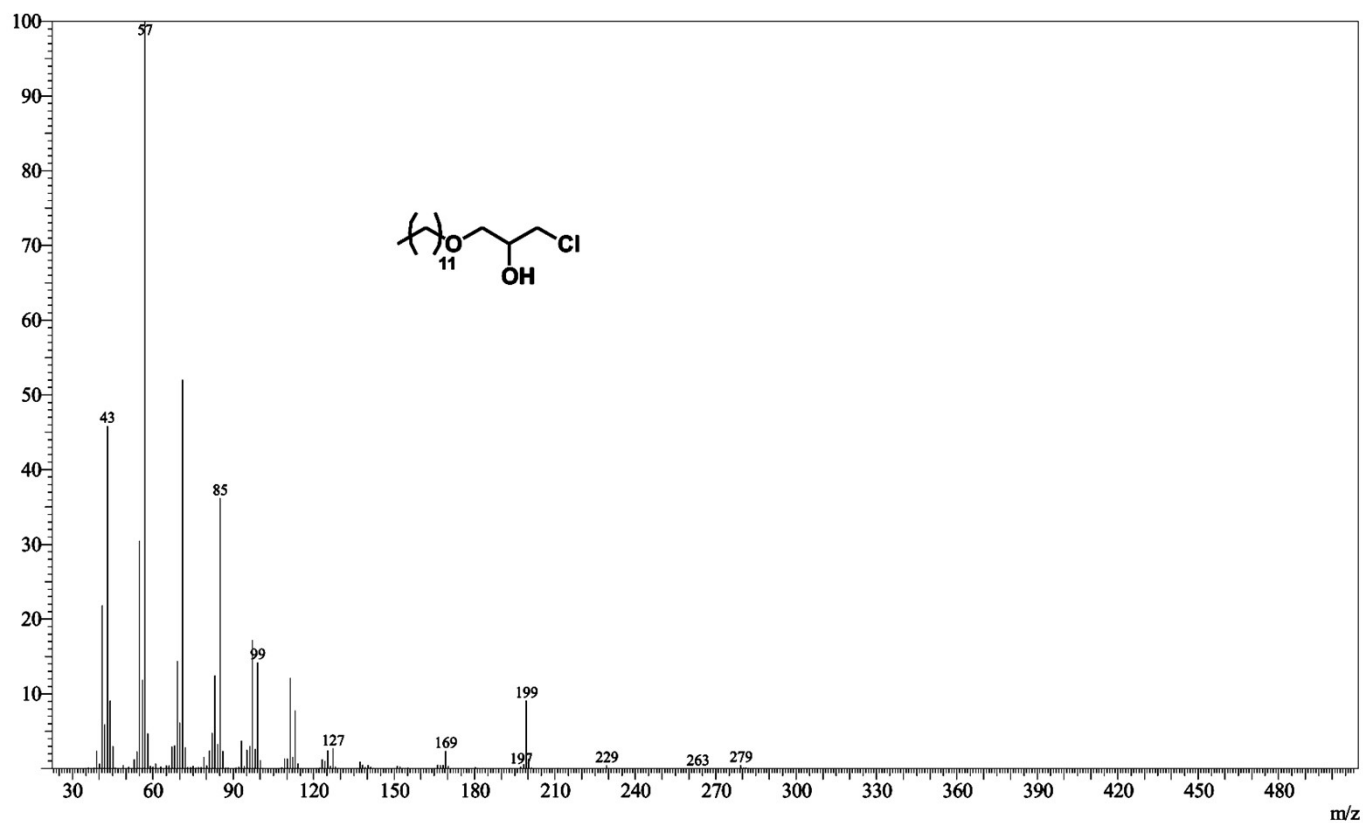

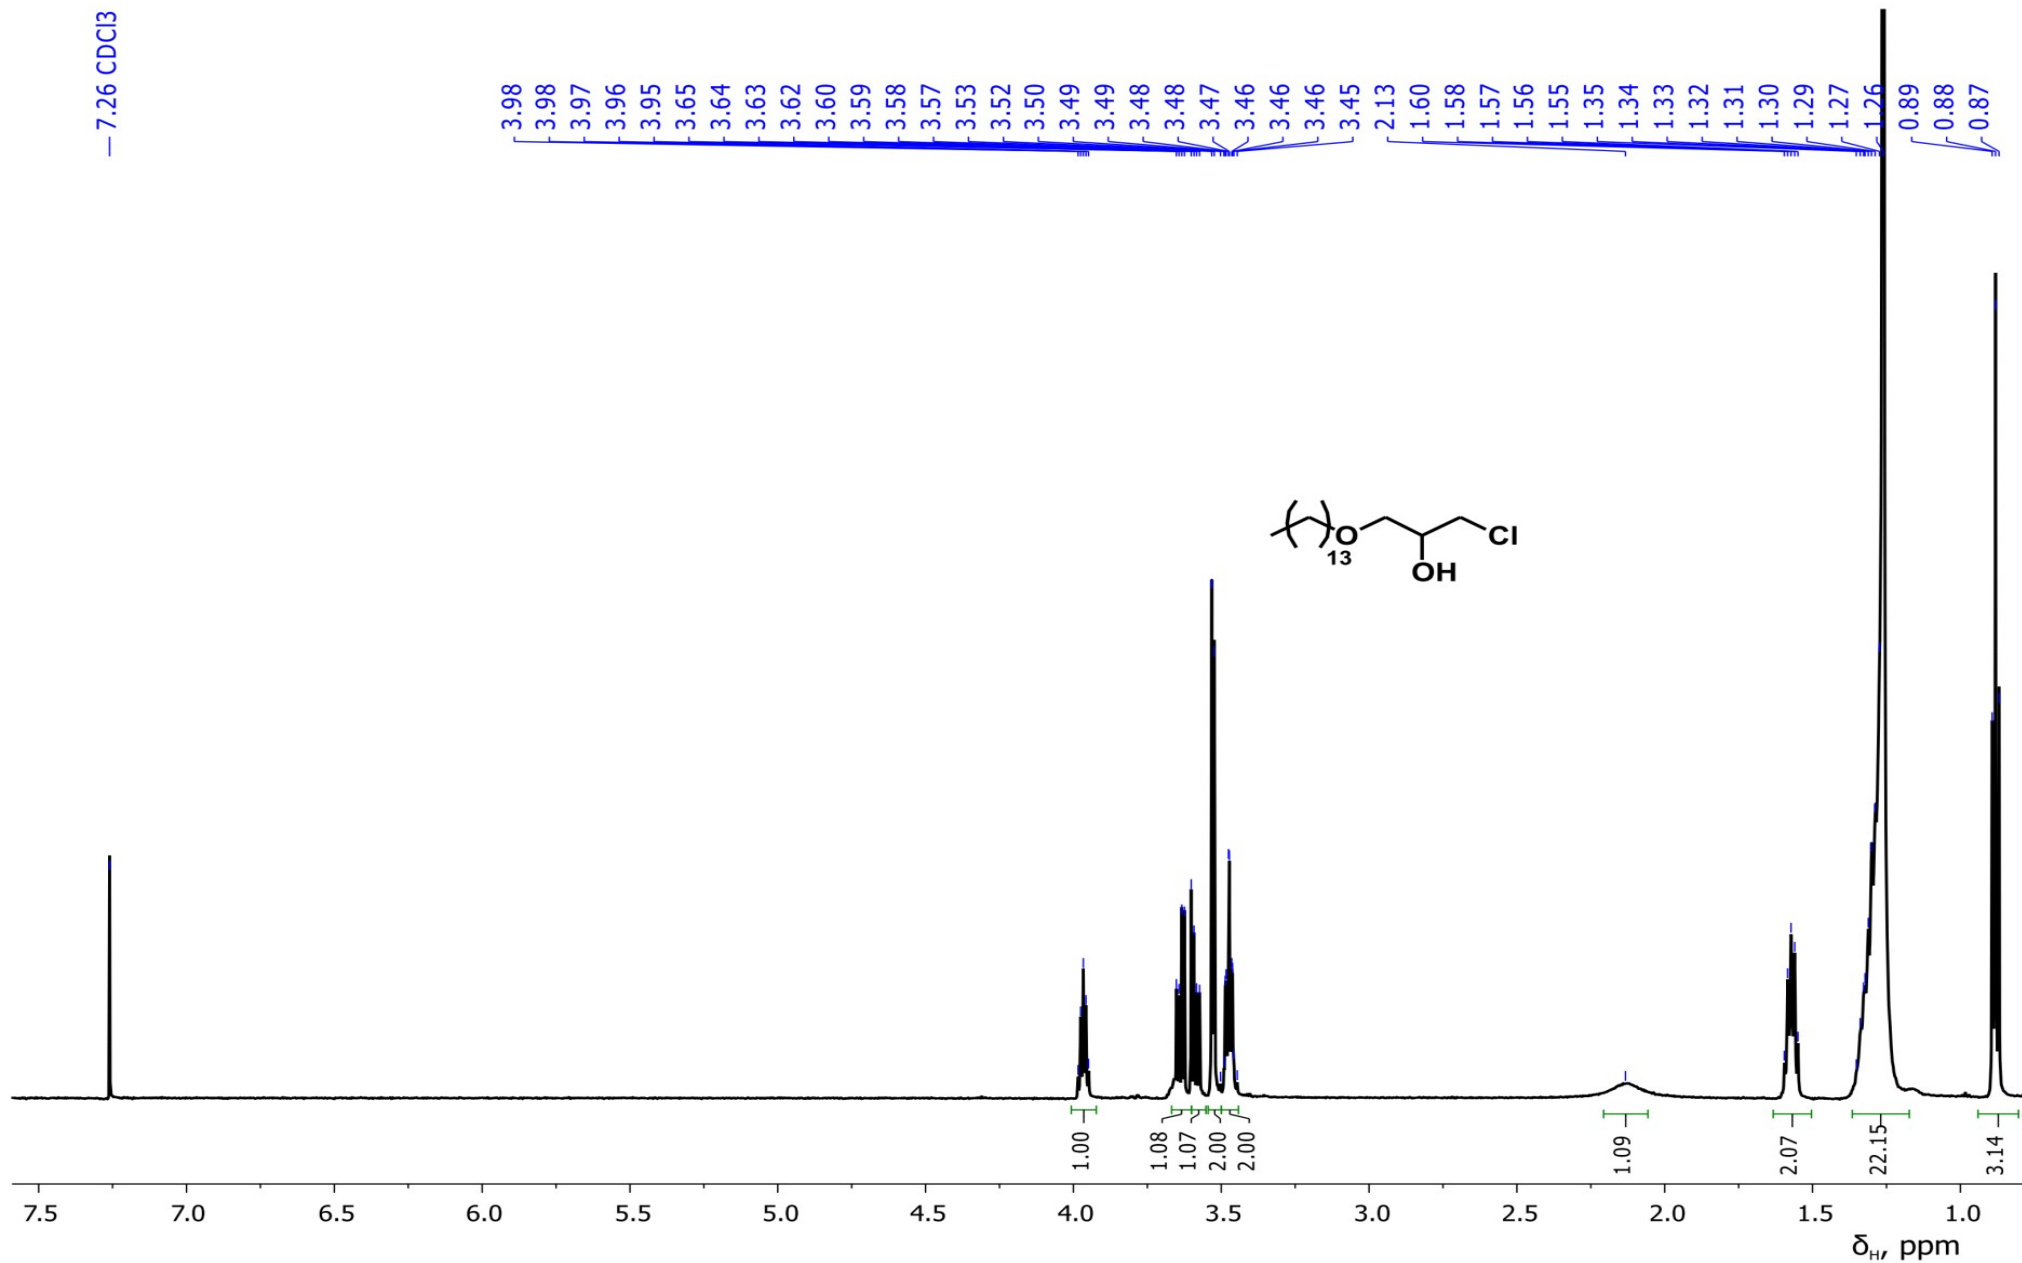

Figure S15. <sup>1</sup>H NMR spectrum (400 MHz, CDCl<sub>3</sub>) of 3-chloro-1-tetradecyloxypropan-2-ol.

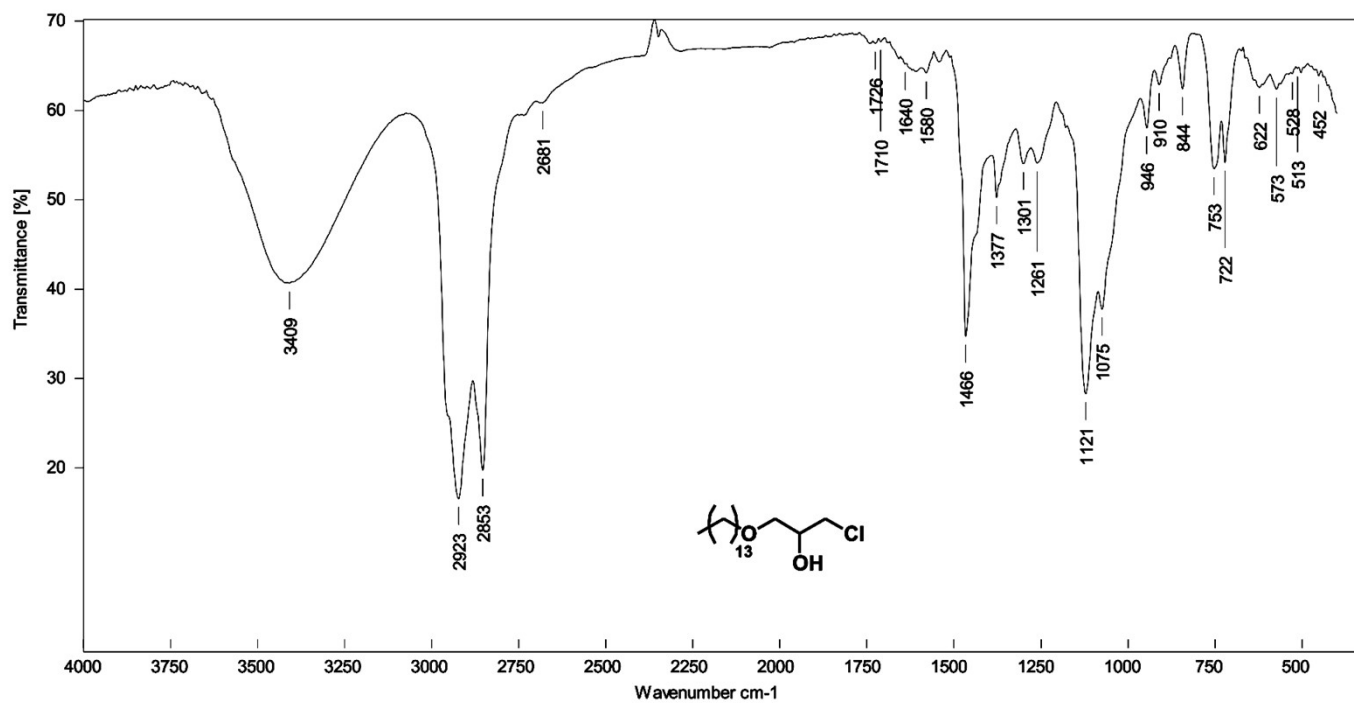

Figure S16. IR spectrum (film) of 3-chloro-1-tetradecyloxypropan-2-ol.

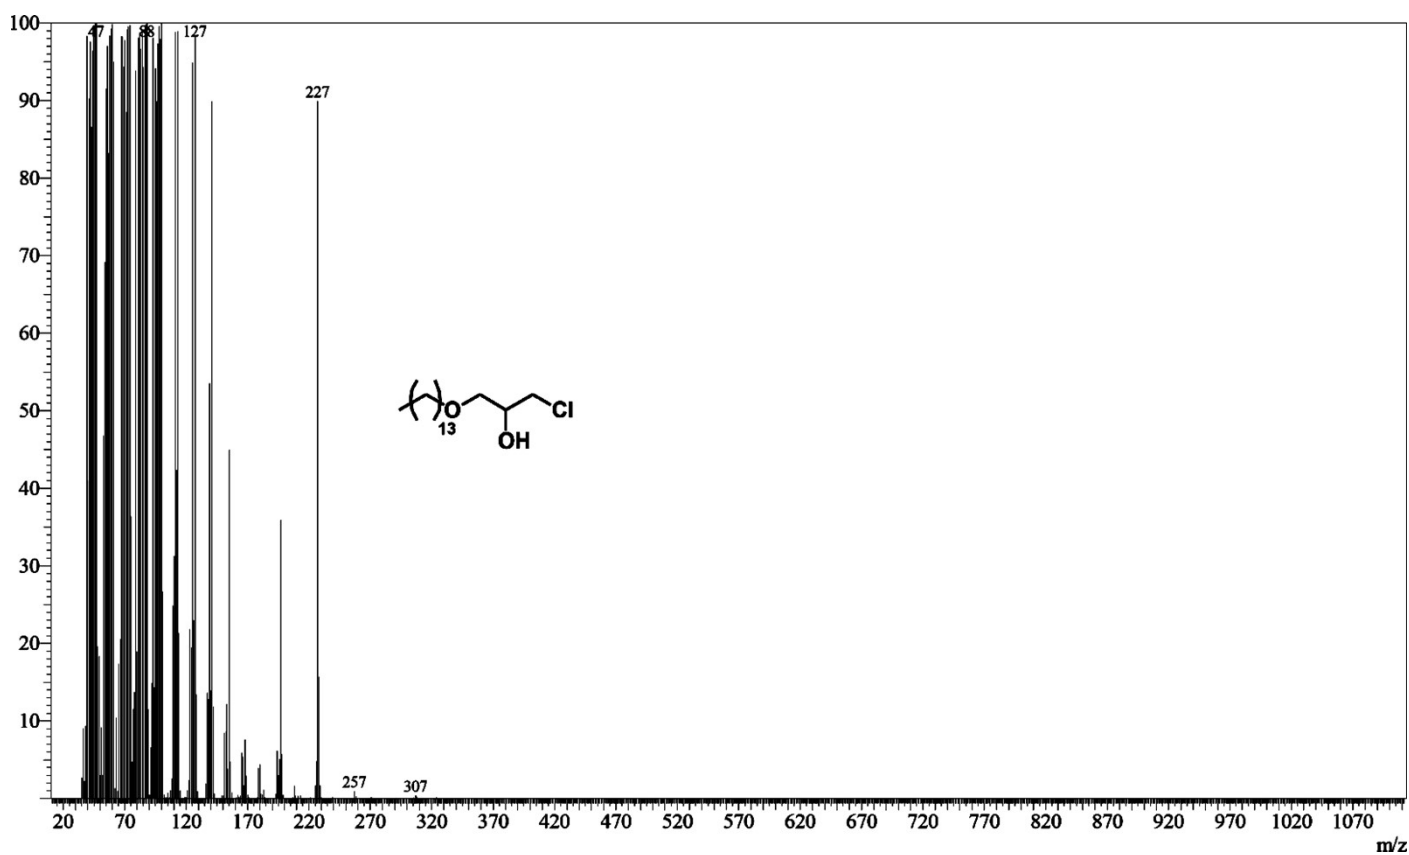

Figure S17. EI-MS spectrum of 3-chloro-1-tetradecyloxypropan-2-ol.

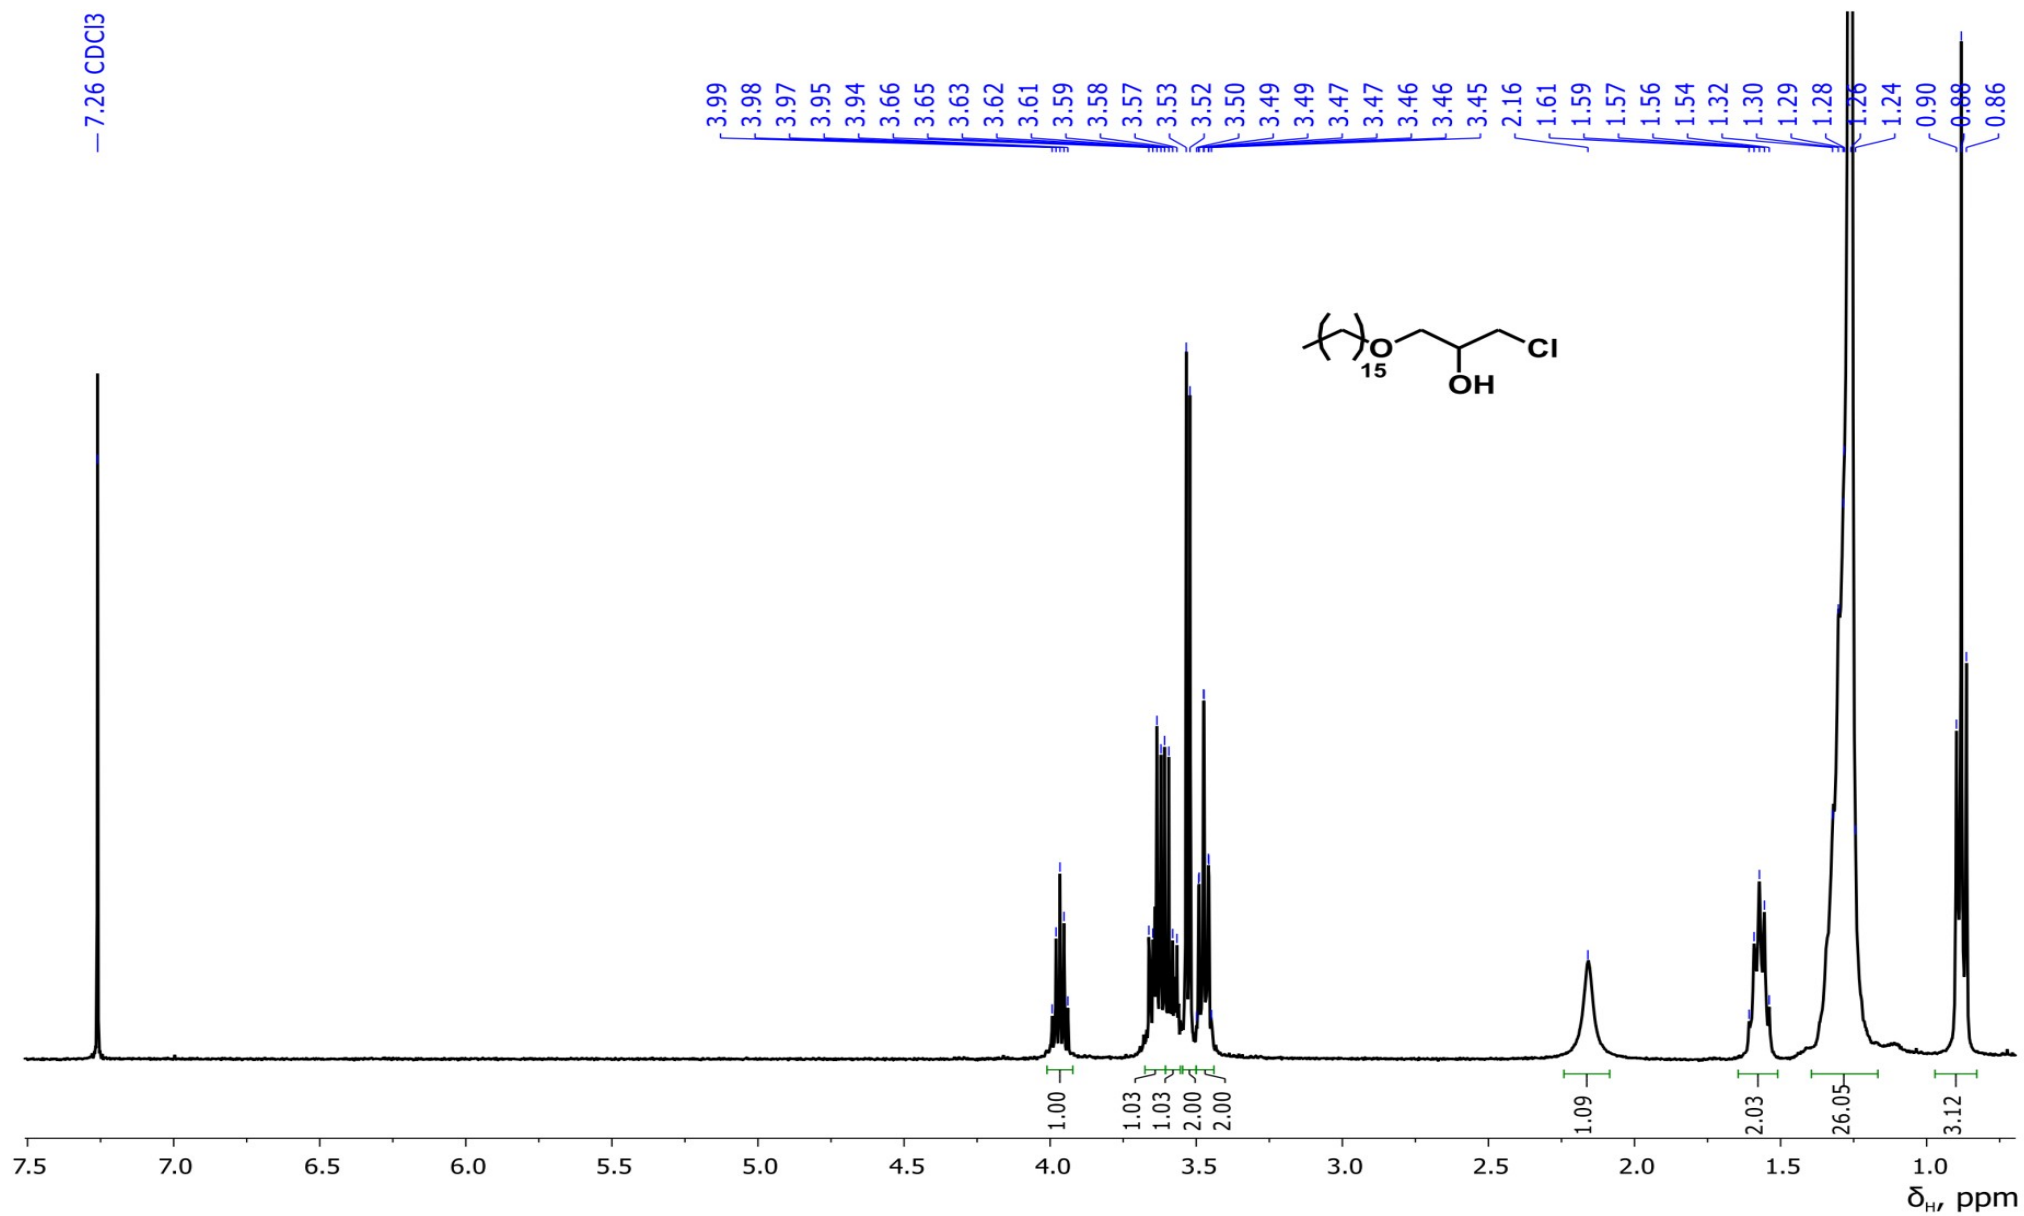

**Figure S18.** <sup>1</sup>H NMR spectrum (400 MHz, CDCl<sub>3</sub>) of 3-chloro-1-hexadecyloxypropan-2-ol.

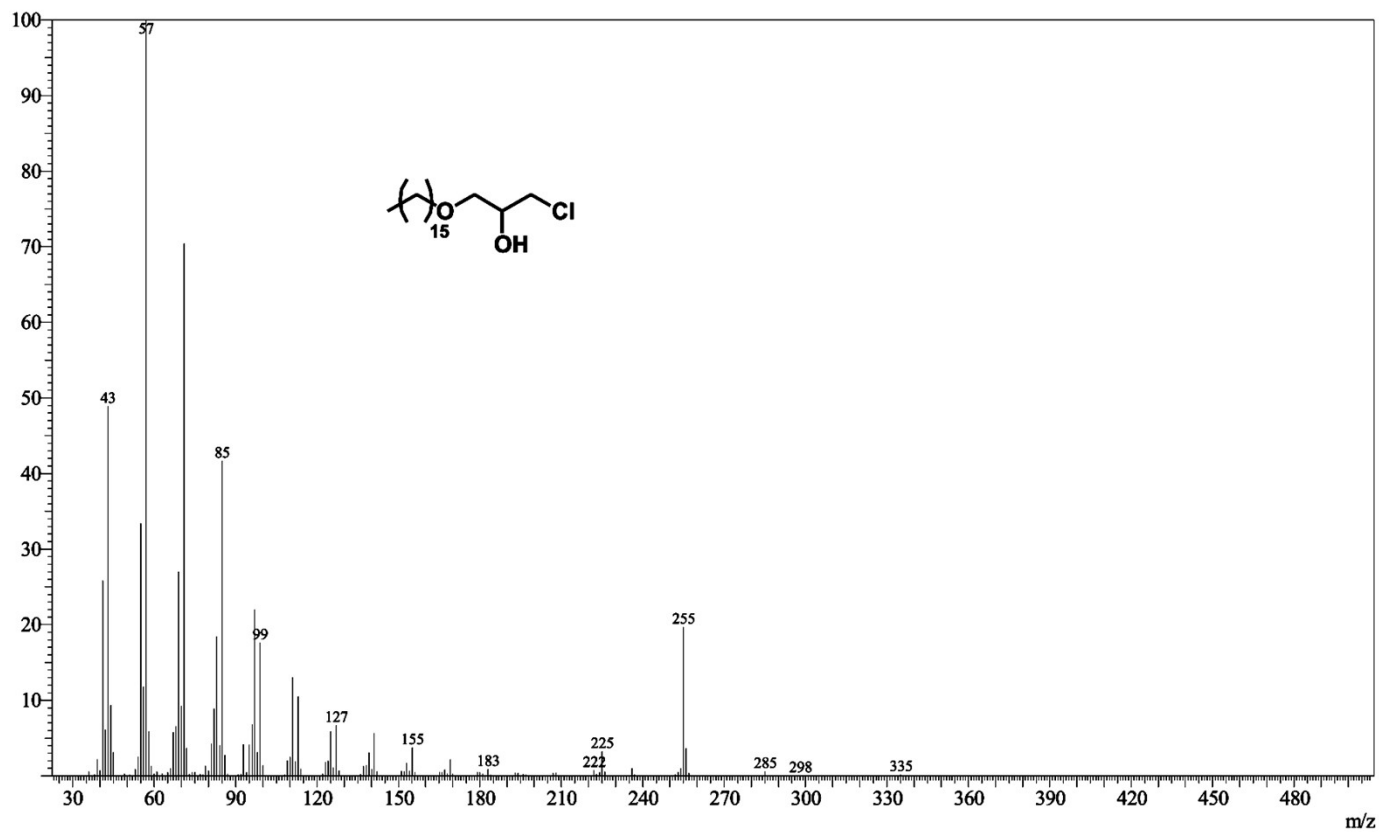

Figure S19. EI-MS spectrum of 3-chloro-1-hexadecyloxypropan-2-ol.

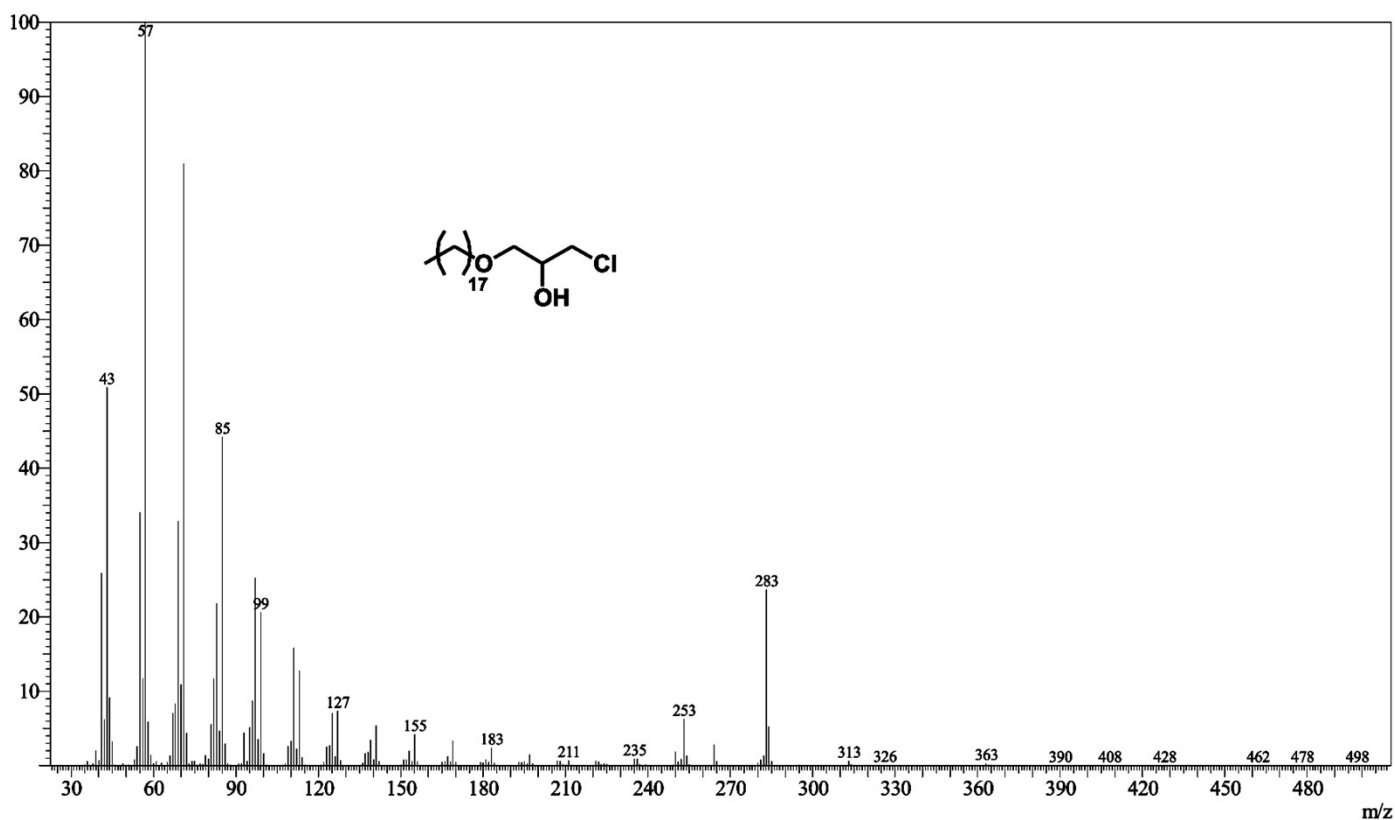

Figure S20. EI-MS spectrum of 3-chloro-1-hexadecyloxypropan-2-ol.

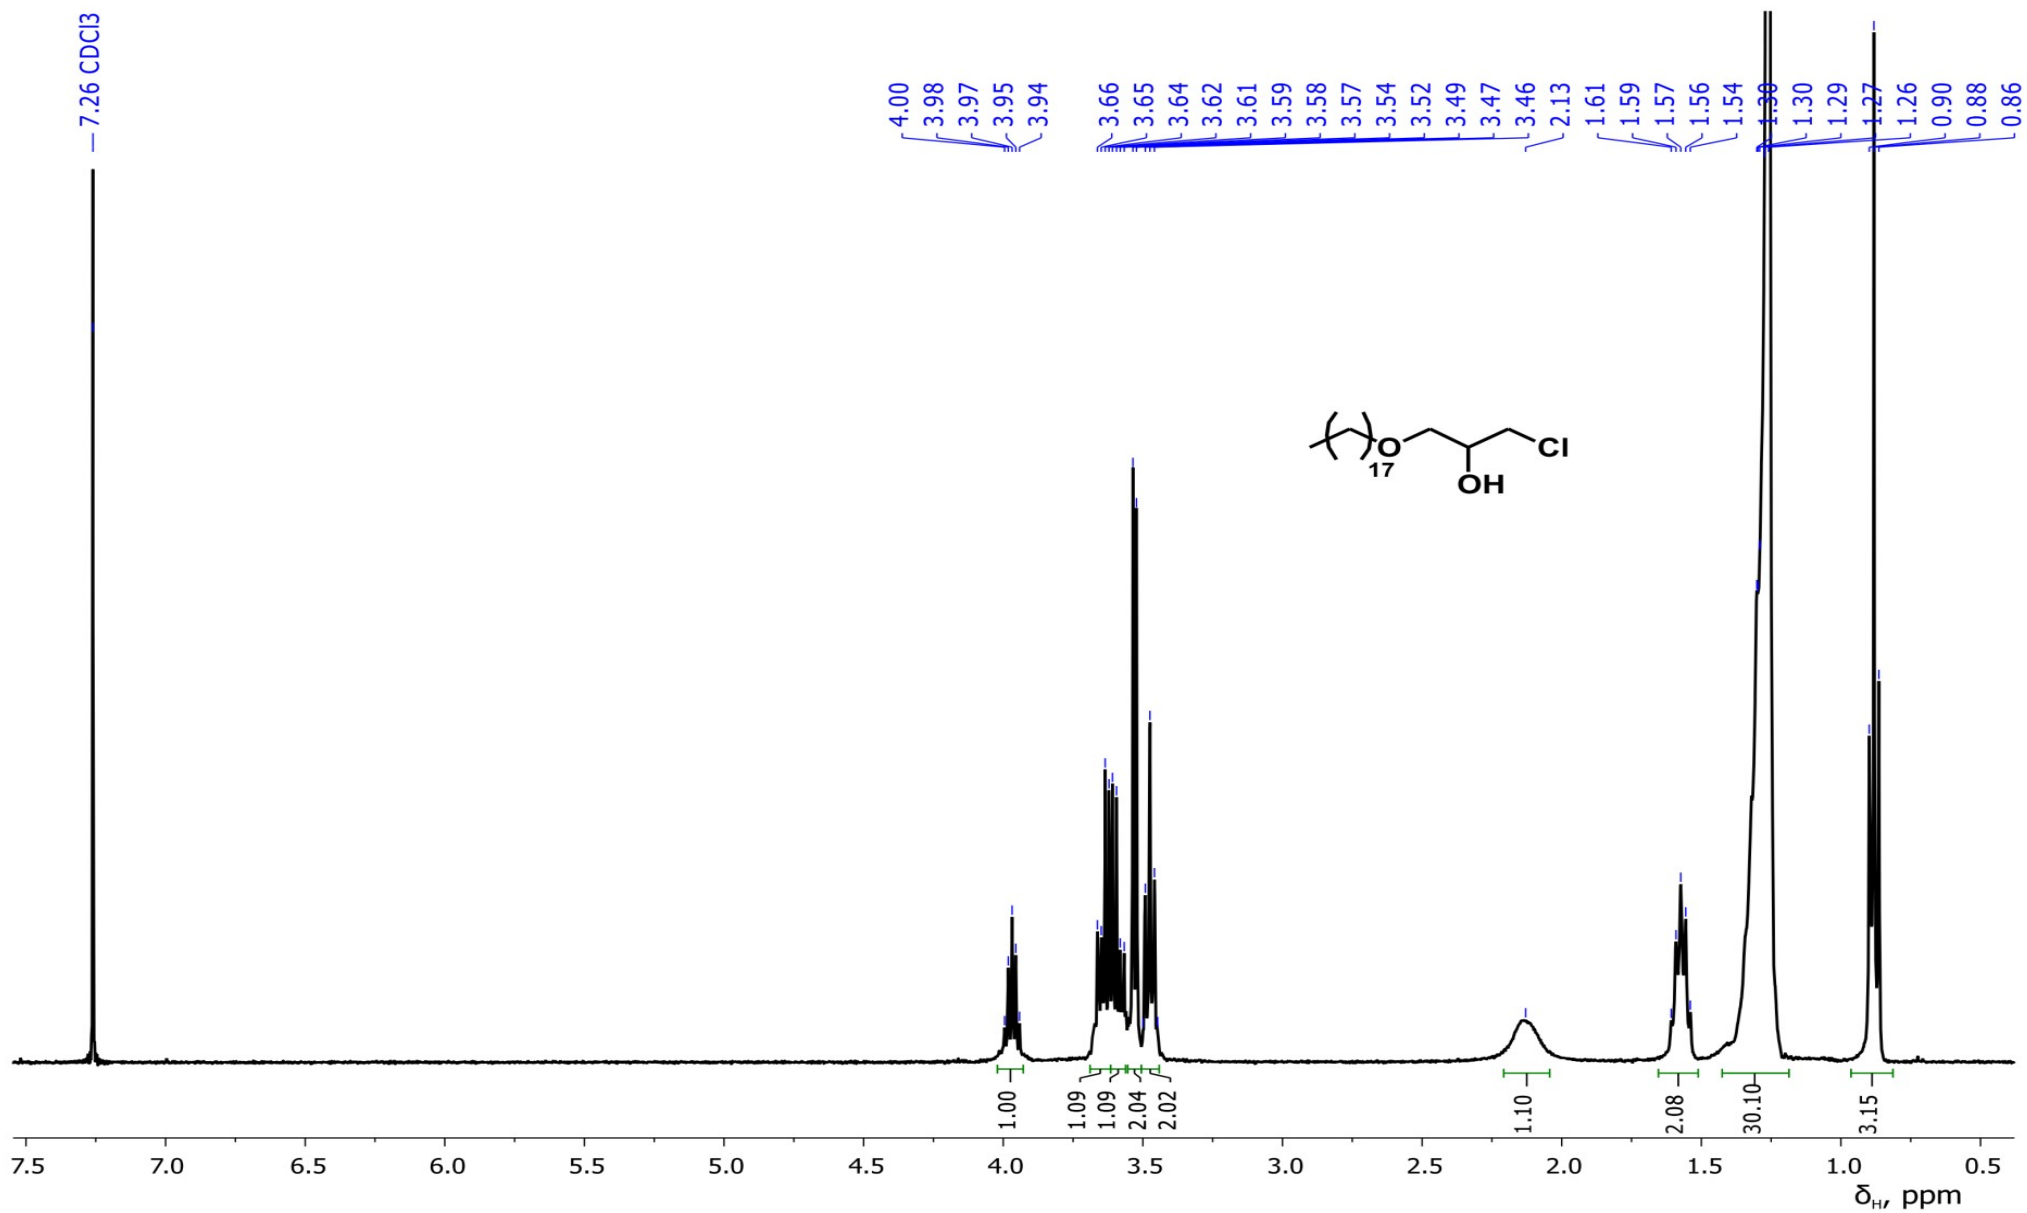

**Figure S21.** <sup>1</sup>H NMR spectrum (400 MHz, CDCl<sub>3</sub>) of 3-chloro-1-octadecyloxypropan-2-ol.

## Spectral data of compounds 1

*2-(Butoxymethyl)oxirane (1c)*. Colorless liquid, bp 62 °C (10 mmHg), yield was 1.716 g (88 %); IR (film): 3489, 3053, 2960, 2934, 2871, 1612, 1466, 1435, 1382, 1337, 1301, 1253, 1159, 1108, 999, 953, 938, 914, 844, 803, 762, 616, 547, 476, 457, 425 cm<sup>-1</sup>; <sup>1</sup>H NMR (400 MHz, CDCl<sub>3</sub>): δ = 3.69 (dd, <sup>2</sup>J<sub>HH</sub> = 11.5 Hz, <sup>3</sup>J<sub>HH</sub> = 3.1 Hz, 1H, H<sup>3</sup><sub>A</sub>), 3.50 (ddd, <sup>2</sup>J<sub>HH</sub> = 9.4 Hz, <sup>3</sup>J<sub>HH</sub> = 6.6 Hz, <sup>3</sup>J<sub>HH</sub> = 6.6 Hz, 1H, H<sup>1'</sup><sub>A</sub>), 3.48 (ddd, <sup>2</sup>J<sub>HH</sub> = 9.5 Hz, <sup>3</sup>J<sub>HH</sub> = 6.6 Hz, <sup>3</sup>J<sub>HH</sub> = 6.6 Hz, 1H, H<sup>1'</sup><sub>B</sub>), 3.39 (dd, <sup>2</sup>J<sub>HH</sub> = 11.5 Hz, <sup>3</sup>J<sub>HH</sub> = 5.8 Hz, 1H, H<sup>3</sup><sub>B</sub>), 3.14 (dddd, <sup>3</sup>J<sub>HH</sub> = 5.8 Hz, <sup>3</sup>J<sub>HH</sub> = 4.1 Hz, <sup>3</sup>J<sub>HH</sub> = 2.9 Hz, <sup>3</sup>J<sub>HH</sub> = 2.9 Hz, 1H, H<sup>2</sup>), 2.79 (dd, <sup>3</sup>J<sub>HH</sub> = 5.0 Hz, <sup>3</sup>J<sub>HH</sub> = 4.1 Hz, 1H, H<sup>1</sup><sub>A</sub>), 2.60 (dd, <sup>3</sup>J<sub>HH</sub> = 5.0 Hz, <sup>3</sup>J<sub>HH</sub> = 2.7 Hz, 1H, H<sup>1</sup><sub>B</sub>), 1.56 (m, <sup>3</sup>J<sub>HH</sub> = 7.5 Hz, 2H, H<sup>2'</sup>), 1.38 (m, <sup>3</sup>J<sub>HH</sub> = 7.5 Hz, 2H, H<sup>3'</sup>), 0.92 (t, <sup>3</sup>J<sub>HH</sub> = 7.3 Hz, 3H, H<sup>4'</sup>); <sup>13</sup>C-<sup>1</sup>H NMR (100.6 MHz, CDCl<sub>3</sub>): δ<sub>C</sub> = 71.27 (s, C<sup>1</sup>), 71.06 (s, C<sup>3</sup>), 50.58 (s, C<sup>2</sup>), 43.85 (s, C<sup>1</sup>), 31.59 (s, C<sup>2'</sup>), 19.04 (s, C<sup>3'</sup>), 13.59 (s, C<sup>4'</sup>); Calculated for C<sub>7</sub>H<sub>14</sub>O<sub>2</sub>: C, 64.58; H, 10.84; Found: C, 64.31; H, 11.07.

*2-((Hexyloxy)methyl)oxirane (1d)*. Colorless liquid, bp 88 °C (10 mmHg), yield was: 2.109 (89 %); IR (film): 3492, 3051, 2956, 2931, 2860, 1959, 1614, 1467, 1379, 1338, 1254, 1109, 977, 911, 849, 762, 727, 557, 532 cm<sup>-1</sup>; <sup>1</sup>H NMR (400 MHz, CDCl<sub>3</sub>): δ = 3.69 (dd, <sup>2</sup>J<sub>HH</sub> = 11.5 Hz, <sup>3</sup>J<sub>HH</sub> = 3.0 Hz, 1H, H<sup>3</sup><sub>A</sub>), 3.50 (dt, <sup>2</sup>J<sub>HH</sub> = 9.3 Hz, <sup>3</sup>J<sub>HH</sub> = 6.9 Hz, 1H, H<sup>1'</sup><sub>A</sub>), 3.46 (dt, <sup>2</sup>J<sub>HH</sub> = 9.3 Hz, <sup>3</sup>J<sub>HH</sub> = 6.9 Hz, 1H, H<sup>1'</sup><sub>B</sub>), 3.38 (dd, <sup>2</sup>J<sub>HH</sub> = 11.5 Hz, <sup>3</sup>J<sub>HH</sub> = 5.6-5.7 Hz, 1H, H<sup>3</sup><sub>B</sub>), 3.13 (dddd, <sup>3</sup>J<sub>HH</sub> = 5.8 Hz, <sup>3</sup>J<sub>HH</sub> = 4.1 Hz, <sup>3</sup>J<sub>HH</sub> = 2.9 Hz, <sup>3</sup>J<sub>HH</sub> = 2.9 Hz, 1H, H<sup>2</sup>), 2.78 (dd, <sup>2</sup>J<sub>HH</sub> = 5.0 Hz, H<sup>1</sup><sub>A</sub>, 1H), 2.60 (dd, <sup>2</sup>J<sub>HH</sub> = 5.0 Hz, <sup>3</sup>J<sub>HH</sub> = 2.6 Hz, 1H, H<sup>1</sup><sub>B</sub>), 1.58 (m, <sup>3</sup>J<sub>HH</sub> = 7.0-7.1 Hz, <sup>3</sup>J<sub>HH</sub> = 7.0-7.1 Hz, 2H, H<sup>2'</sup>), 1.37-1.24 (m, 8H, H<sup>3'</sup>-H<sup>5'</sup>), 0.88 (t, <sup>3</sup>J<sub>HH</sub> = 6.9-7.0 Hz, 3H, C<sup>6'</sup>); <sup>13</sup>C-<sup>1</sup>H NMR (100.6 MHz, CDCl<sub>3</sub>): δ<sub>C</sub> = 70.84 (s, C<sup>1</sup>), 70.58 (s, C<sup>3</sup>), 49.77 (s, C<sup>2</sup>), 42.75 (s, C<sup>1</sup>), 31.01 (s, C<sup>2'</sup>), 29.02 (s, C<sup>3'</sup>), 25.11 (s, C<sup>4'</sup>), 21.89 (s, C<sup>5'</sup>), 13.11 (s, C<sup>6'</sup>); Calculated for C<sub>9</sub>H<sub>18</sub>O<sub>2</sub>: C, 68.31; H, 11.47; Found: C, 68.05; H, 11.68.

*2-((Octyloxy)methyl)oxirane (1e)*. Colorless liquid, bp 125 °C (12 mmHg), yield was 2.427 g (87 %); IR (film): 3491, 3050, 2927, 2856, 1613, 1467, 1378, 1338, 1253, 1158, 1110, 976, 949, 912, 848, 807, 762, 617, 552 cm<sup>-1</sup>; <sup>1</sup>H NMR (400 MHz, CDCl<sub>3</sub>): δ = 3.69 (dd, <sup>2</sup>J<sub>HH</sub> = 11.6 Hz, <sup>3</sup>J<sub>HH</sub> = 3.1 Hz, 1H, H<sup>3</sup><sub>A</sub>), 3.50 (dt, <sup>2</sup>J<sub>HH</sub> = 8.8 Hz, <sup>3</sup>J<sub>HH</sub> = 6.6 Hz, 1H, H<sup>1'</sup><sub>A</sub>), 3.45 (dt, <sup>2</sup>J<sub>HH</sub> = 8.8 Hz, <sup>3</sup>J<sub>HH</sub> = 6.6 Hz, 1H, H<sup>1'</sup><sub>B</sub>), 3.38 (dd, <sup>2</sup>J<sub>HH</sub> = 11.6 Hz, <sup>3</sup>J<sub>HH</sub> = 5.6-5.7 Hz, 1H, H<sup>3</sup><sub>B</sub>), 3.13 (dddd, <sup>3</sup>J<sub>HH</sub> = 6.0 Hz, <sup>3</sup>J<sub>HH</sub> = 4.4 Hz, <sup>3</sup>J<sub>HH</sub> = 3.3 Hz, <sup>3</sup>J<sub>HH</sub> = 3.3 Hz, 1H, H<sup>2</sup>), 2.78 (dd, <sup>2</sup>J<sub>HH</sub> = 5.0 Hz, 1H, H<sup>1</sup><sub>A</sub>), 2.60 (dd, <sup>2</sup>J<sub>HH</sub> = 5.0 Hz, <sup>3</sup>J<sub>HH</sub> = 2.7 Hz, 1H, H<sup>1</sup><sub>B</sub>), 1.58 (m, <sup>3</sup>J<sub>HH</sub> = 7.0-7.1 Hz, <sup>3</sup>J<sub>HH</sub> = 7.0-7.1 Hz, 2H, H<sup>2'</sup>), 1.21-1.38 (m, 12H, H<sup>3'</sup>-H<sup>7'</sup>), 0.87 (t, <sup>3</sup>J<sub>HH</sub> = 6.9-7.0 Hz, 3H, C<sup>8'</sup>); <sup>13</sup>C-<sup>1</sup>H NMR (100.6 MHz, CDCl<sub>3</sub>): δ<sub>C</sub> = 70.86 (s, C<sup>1</sup>), 70.65 (s, C<sup>3</sup>), 49.81 (s, C<sup>2</sup>), 42.79 (s, C<sup>1</sup>), 31.21 (s, C<sup>2'</sup>), 29.12 (s, C<sup>5'</sup>), 28.82 (s, C<sup>4'</sup>), 28.67 (s, C<sup>3'</sup>), 25.49 (s, C<sup>6'</sup>), 21.98 (s, C<sup>7'</sup>), 13.23 (s, C<sup>8'</sup>); Calculated for C<sub>11</sub>H<sub>22</sub>O<sub>2</sub>: C, 70.92; H, 11.90; Found: C, 70.63; H, 12.14.

*2-((Decyloxy)methyl)oxirane (1f)*. Colorless liquid, bp 87-90 °C (0.1 mmHg), yield was 2.898 g (90 %); IR (film): 3051, 2926, 2855, 1613, 1467, 1338, 1253, 1158, 1111, 913, 848, 762, 722 cm<sup>-1</sup>; <sup>1</sup>H NMR (400 MHz, CDCl<sub>3</sub>): δ = 3.47 (dd, <sup>2</sup>J<sub>HH</sub> = 11.5 Hz, <sup>3</sup>J<sub>HH</sub> = 3.0 Hz, 1H, H<sup>3</sup><sub>A</sub>), 3.13 (dd, <sup>2</sup>J<sub>HH</sub> = 11.4 Hz, <sup>3</sup>J<sub>HH</sub> = 5.8 Hz, 1H, H<sup>3</sup><sub>B</sub>), 3.23-3.26 (m, <sup>2</sup>J<sub>HH</sub> = 10.0-11.0 Hz, <sup>3</sup>J<sub>HH</sub> = 6.7 Hz, H<sup>1'</sup>), 2.90 (m, <sup>3</sup>J<sub>HH</sub> = 3.0 Hz, 1H, H<sup>2</sup>), 2.55 (dd, <sup>2</sup>J<sub>HH</sub> = 5.2 Hz, <sup>3</sup>J<sub>HH</sub> = 4.1 Hz, 1H, H<sup>1</sup><sub>A</sub>), 2.36 (dd, <sup>2</sup>J<sub>HH</sub> = 5.1 Hz, <sup>3</sup>J<sub>HH</sub> = 2.7 Hz, 1H, H<sup>3</sup><sub>B</sub>), 1.04-1.10

(m, 14H, H<sup>3'</sup>-H<sup>9'</sup>), 0.65 (t, <sup>3</sup>J<sub>HH</sub> = 6.7 Hz, 3H, H<sup>10'</sup>); <sup>13</sup>C-<sup>1</sup>H NMR (100.6 MHz, CDCl<sub>3</sub>): δ<sub>C</sub> = 71.58 (s, C<sup>1'</sup>), 71.40 (s, C<sup>3</sup>), 50.75 (s, C<sup>2</sup>), 44.06 (s, C<sup>1</sup>), 31.86 (s, C<sup>2'</sup>), 29.66 (s, C<sup>3'</sup>), 29.56 (s, C<sup>4'</sup>), 29.53 (s, C<sup>5'</sup>), 9.44 (s, C<sup>6'</sup>), 29.29 (s, C<sup>7'</sup>), 26.05 (s, C<sup>8'</sup>), 22.62 (s, C<sup>9'</sup>), 14.01 (s, C<sup>10'</sup>); Calculated for C<sub>13</sub>H<sub>26</sub>O<sub>2</sub>: C, 72.85; H, 12.23; Found: C, 72.51; H, 12.50.

*2-((Dodecyloxy)methyl)oxirane (Ig)*. Colorless liquid, bp 122 °C (0.1 mmHg), yield was 3.312 g (91 %); IR (film): 3049, 2925, 2854, 1725, 1612, 1466, 1378, 1338, 1253, 1158, 1112, 949, 913, 848, 807, 762, 722 cm<sup>-1</sup>; <sup>1</sup>H NMR (400 MHz, CDCl<sub>3</sub>): δ = 3.69 (dd, <sup>2</sup>J<sub>HH</sub> = 11.5 Hz, <sup>3</sup>J<sub>HH</sub> = 3.2 Hz, 1H, H<sup>3</sup><sub>A</sub>), 3.50 (dt, <sup>2</sup>J<sub>HH</sub> = 9.3 Hz, <sup>3</sup>J<sub>HH</sub> = 6.6 Hz, 1H, H<sup>1'</sup><sub>A</sub>), 3.46 (dt, <sup>2</sup>J<sub>HH</sub> = 9.3 Hz, <sup>3</sup>J<sub>HH</sub> = 6.9 Hz, 1H, H<sup>1'</sup><sub>B</sub>), 3.39 (dd, <sup>2</sup>J<sub>HH</sub> = 11.5 Hz, <sup>3</sup>J<sub>HH</sub> = 5.6-5.7 Hz, 1H, H<sup>3</sup><sub>B</sub>), 3.14 (dddd, <sup>3</sup>J<sub>HH</sub> = 5.7 Hz, <sup>3</sup>J<sub>HH</sub> = 3.0 Hz, <sup>3</sup>J<sub>HH</sub> = 2.6 Hz, <sup>3</sup>J<sub>HH</sub> = 2.7 Hz, 1H, H<sup>2</sup>), 2.79 (dd, <sup>2</sup>J<sub>HH</sub> = 4.9 Hz, <sup>3</sup>J<sub>HH</sub> = 3.8 Hz, 1H, H<sup>1</sup><sub>A</sub>), 2.60 (dd, <sup>2</sup>J<sub>HH</sub> = 4.9 Hz, <sup>3</sup>J<sub>HH</sub> = 2.7 Hz, 1H, H<sup>1</sup><sub>B</sub>), 1.58 (m, <sup>3</sup>J<sub>HH</sub> = 7.0-7.1 Hz, <sup>3</sup>J<sub>HH</sub> = 7.0-7.1 Hz, 2H, H<sup>2'</sup>), 1.20-1.39 (m, 18H, H<sup>3'</sup>-H<sup>11'</sup>), 0.88 (t, <sup>3</sup>J<sub>HH</sub> = 7.1 Hz, 3H, C<sup>12'</sup>); <sup>13</sup>C-<sup>1</sup>H NMR (100.6 MHz, CDCl<sub>3</sub>): δ<sub>C</sub> = 71.34 (s, C<sup>1'</sup>), 71.24 (s, C<sup>3</sup>), 50.47 (s, C<sup>2</sup>), 43.66 (s, C<sup>2'</sup>), 29.53 (s, C<sup>3'</sup>), 29.48 (s, C<sup>4'</sup>), 29.45 (s, C<sup>5'</sup> overlapped with C<sup>6'</sup>), 29.42 (s, C<sup>7'</sup>), 29.29 (s, C<sup>8'</sup>), 29.16 (s, C<sup>9'</sup>), 25.91 (s, C<sup>10'</sup>), 22.45 (s, C<sup>11'</sup>), 13.78 (s, C<sup>12'</sup>); Calcd. for C<sub>15</sub>H<sub>30</sub>O<sub>2</sub>: C, 74.32; H, 12.48; Found: C, 74.01; H, 12.72.

*2-((Tetradecyloxy)methyl)oxirane (Ih)*. Colorless low-melting solid, bp 142 °C (0.1 mmHg), mp = 18-19 °C, yield was 3.816 g (94 %); IR (film): 3477, 3049, 2925, 2854, 2362, 1632, 1467, 1391, 1378, 1338, 1300, 1253, 1158, 1112, 973, 913, 847, 806, 762, 722, 618 cm<sup>-1</sup>; <sup>1</sup>H NMR (400 MHz, CDCl<sub>3</sub>): δ = 3.69 (dd, <sup>2</sup>J<sub>HH</sub> = 11.5 Hz, <sup>3</sup>J<sub>HH</sub> = 3.2 Hz, 1H, H<sup>3</sup><sub>A</sub>), 3.50 (dt, <sup>2</sup>J<sub>HH</sub> = 9.3 Hz, <sup>3</sup>J<sub>HH</sub> = 6.9 Hz, 1H, H<sup>1'</sup><sub>A</sub>), 3.46 (dt, <sup>2</sup>J<sub>HH</sub> = 9.3 Hz, <sup>3</sup>J<sub>HH</sub> = 6.6 Hz, 1H, H<sup>1'</sup><sub>B</sub>), 3.39 (dd, <sup>2</sup>J<sub>HH</sub> = 11.3 Hz, <sup>3</sup>J<sub>HH</sub> = 6.0 Hz, 1H, H<sup>3</sup><sub>B</sub>), 3.14 (dddd, <sup>3</sup>J<sub>HH</sub> = 5.7 Hz, <sup>3</sup>J<sub>HH</sub> = 3.0 Hz, <sup>3</sup>J<sub>HH</sub> = 2.7 Hz, <sup>3</sup>J<sub>HH</sub> = 2.7 Hz, 1H, H<sup>2</sup>), 2.79 (dd, <sup>2</sup>J<sub>HH</sub> = 5.2 Hz, <sup>3</sup>J<sub>HH</sub> = 4.1 Hz, 1H, H<sup>1</sup><sub>A</sub>), 2.60 (dd, <sup>2</sup>J<sub>HH</sub> = 4.9 Hz, <sup>3</sup>J<sub>HH</sub> = 2.7 Hz, 1H, H<sup>1</sup><sub>B</sub>), 1.58 (m, <sup>3</sup>J<sub>HH</sub> = 7.0-7.1 Hz, <sup>3</sup>J<sub>HH</sub> = 7.0-7.1 Hz, 2H, H<sup>2'</sup>), 1.21-1.37 (m, 22H, H<sup>3'</sup>-H<sup>13'</sup>), 0.88 (t, <sup>3</sup>J<sub>HH</sub> = 7.1 Hz, 3H, C<sup>14'</sup>); <sup>13</sup>C-<sup>1</sup>H NMR (100.6 MHz, CDCl<sub>3</sub>): δ<sub>C</sub> = 71.40 (s, C<sup>1'</sup>), 71.28 (s, C<sup>3</sup>), 50.55 (s, C<sup>2</sup>), 43.77 (s, C<sup>1</sup>), 31.80 (s, C<sup>2'</sup>), 29.57 (s, C<sup>3'</sup> overlapped with C<sup>4'</sup>-C<sup>7'</sup>), 29.56 (s, C<sup>8'</sup>), 29.49 (s, C<sup>9'</sup>), 29.36 (s, C<sup>10'</sup>), 29.25 (s, C<sup>11'</sup>), 25.96 (s, C<sup>12'</sup>), 22.53 (s, C<sup>13'</sup>), 13.88 (s, C<sup>14'</sup>); Calcd. for C<sub>15</sub>H<sub>30</sub>O<sub>2</sub>: C, 74.32; H, 12.48; Found: C, 73.98; H, 12.80.

*2-((Hexadecyloxy)methyl)oxirane (Ii)*. Purified by column chromatography using a linear gradient elution system from 100 % to 30 % (by volume) hexane-diethyl ether. Colorless low-melting solid, mp 28-31 °C, TLC R<sub>f</sub> = 0.35 (hexane/Et<sub>2</sub>O = 7/3), yield was 3.987 g (89 %); IR (film): 3439, 2956, 2919, 2851, 1736, 1637, 1468, 1396, 1378, 1340, 1256, 1162, 1122, 1026, 985, 968, 945, 909, 856, 800, 762, 722, 540, 494 cm<sup>-1</sup>; <sup>1</sup>H NMR (400 MHz, CDCl<sub>3</sub>): δ = 3.69 (dd, <sup>2</sup>J<sub>HH</sub> = 11.5 Hz, <sup>3</sup>J<sub>HH</sub> = 3.2 Hz, 1H, H<sup>3</sup><sub>A</sub>), 3.50 (dt, <sup>2</sup>J<sub>HH</sub> = 9.3 Hz, <sup>3</sup>J<sub>HH</sub> = 6.9 Hz, 1H, H<sup>1'</sup><sub>A</sub>), 3.46 (dt, <sup>2</sup>J<sub>HH</sub> = 9.3 Hz, <sup>3</sup>J<sub>HH</sub> = 6.6 Hz, 1H, H<sup>1'</sup><sub>B</sub>), 3.39 (dd, <sup>2</sup>J<sub>HH</sub> = 11.5 Hz, <sup>3</sup>J<sub>HH</sub> = 5.7 Hz, 1H, H<sup>3</sup><sub>B</sub>), 3.14 (dddd, <sup>3</sup>J<sub>HH</sub> = 5.8 Hz, <sup>3</sup>J<sub>HH</sub> = 3.1 Hz, <sup>3</sup>J<sub>HH</sub> = 3.1 Hz, <sup>3</sup>J<sub>HH</sub> = 3.1 Hz, 1H, H<sup>2</sup>), 2.79 (dd, <sup>2</sup>J<sub>HH</sub> = 4.6 Hz, <sup>3</sup>J<sub>HH</sub> = 4.6 Hz, 1H, H<sup>1</sup><sub>A</sub>), 2.60 (dd, <sup>2</sup>J<sub>HH</sub> = 5.9 Hz, <sup>3</sup>J<sub>HH</sub> = 2.7 Hz, 1H, H<sup>1</sup><sub>B</sub>), 1.58 (m, <sup>3</sup>J<sub>HH</sub> = 7.0-7.1 Hz, <sup>3</sup>J<sub>HH</sub> = 7.0-7.1 Hz, 2H, H<sup>2'</sup>), 1.21-1.37 (m, 26H, H<sup>3'</sup>-H<sup>15'</sup>), 0.88 (t, <sup>3</sup>J<sub>HH</sub> = 7.1 Hz, 3H, C<sup>16'</sup>); <sup>13</sup>C-<sup>1</sup>H NMR (100.6 MHz, CDCl<sub>3</sub>): δ<sub>C</sub> = 71.73 (s, C<sup>1'</sup>), 71.50 (s, C<sup>3</sup>), 50.87 (s, C<sup>2</sup>), 44.23 (s, C<sup>1</sup>), 31.98 (s, C<sup>2'</sup>), 29.75 (s, C<sup>3'</sup> overlapped with C<sup>4'</sup>-C<sup>8'</sup>), 29.72 (s, C<sup>9'</sup>), 29.66 (s, C<sup>11'</sup> overlapped with C<sup>10'</sup>),

29.53 (s, C<sup>12'</sup>), 29.42 (s, C<sup>13'</sup>), 26.15 (s, C<sup>14'</sup>), 22.73 (s, C<sup>15'</sup>), 14.11 (s, C<sup>16'</sup>); Calcd. for C<sub>19</sub>H<sub>38</sub>O<sub>2</sub>: C, 76.45; H, 12.83; Found: C, 76.12; H, 13.09.

*2-((Octadecyloxy)methyl)oxirane (Ij)*. Purified by column chromatography using a linear gradient elution system from 100 % to 30 % (by volume) hexane-diethyl ether. Colorless low-melting solid, mp 38-39 °C, TLC  $R_f$  = 0.49 (hexane/Et<sub>2</sub>O = 7/3), yield was 4.361 g (89 %); IR (film): 3447, 2956, 2918, 2850, 2772, 2634, 1465, 1396, 1378, 1340, 1251, 1209, 1125, 1033, 1009, 966, 945, 907, 853, 799, 762, 729, 720, 541, 510, 471, 456, 422 cm<sup>-1</sup>; <sup>1</sup>H NMR (400 MHz, CDCl<sub>3</sub>):  $\delta$  = 3.69 (dd, <sup>2</sup> $J_{HH}$  = 11.5 Hz, <sup>3</sup> $J_{HH}$  = 3.2 Hz, 1H, H<sup>3</sup><sub>A</sub>), 3.50 (dt, <sup>2</sup> $J_{HH}$  = 9.3 Hz, <sup>3</sup> $J_{HH}$  = 5.0 Hz, 1H, H<sup>1</sup><sub>A</sub>), 3.46 (dt, <sup>2</sup> $J_{HH}$  = 9.3 Hz, <sup>3</sup> $J_{HH}$  = 5.0 Hz, 1H, H<sup>1</sup><sub>B</sub>), 3.39 (dd, <sup>2</sup> $J_{HH}$  = 11.5 Hz, <sup>3</sup> $J_{HH}$  = 5.7 Hz, 1H, H<sup>3</sup><sub>B</sub>), 3.14 (dddd, <sup>3</sup> $J_{HH}$  = 5.7 Hz, <sup>3</sup> $J_{HH}$  = 3.0 Hz, <sup>3</sup> $J_{HH}$  = 2.7 Hz, 1H, H<sup>2</sup>), 2.79 (dd, <sup>2</sup> $J_{HH}$  = 4.7 Hz, <sup>3</sup> $J_{HH}$  = 4.5 Hz, 1H, H<sup>1</sup><sub>A</sub>), 2.60 (dd, <sup>2</sup> $J_{HH}$  = 5.0 Hz, <sup>3</sup> $J_{HH}$  = 2.7 Hz, 1H, H<sup>1</sup><sub>B</sub>), 1.58 (m, <sup>3</sup> $J_{HH}$  = 7.0-7.1 Hz, <sup>3</sup> $J_{HH}$  = 7.0-7.1 Hz, 2H, H<sup>2</sup>), 1.21-1.37 (m, 30H, H<sup>3</sup>'-H<sup>17</sup>'), 0.88 (t, <sup>3</sup> $J_{HH}$  = 7.1 Hz, 3H, C<sup>18</sup>); <sup>13</sup>C-<sup>1</sup>H NMR (100.6 MHz, CDCl<sub>3</sub>):  $\delta_C$  = 71.80 (s, C<sup>1'</sup>), 71.54 (s, C<sup>3</sup>), 50.93 (s, C<sup>2</sup>), 44.31 (s, C<sup>1</sup>), 32.02 (s, C<sup>2'</sup>), 29.79 (s, C<sup>3'</sup> overlapped with C<sup>4'</sup>-C<sup>10'</sup>), 29.76 (s, C<sup>11'</sup>), 29.70 (s, C<sup>12'</sup>), 29.69 (s, C<sup>13'</sup>), 29.57 (s, C<sup>14'</sup>), 29.45 (s, C<sup>15'</sup>), 26.19 (s, C<sup>16'</sup>), 22.77 (s, C<sup>17'</sup>), 14.16 (s, C<sup>18'</sup>); Calcd. for C<sub>21</sub>H<sub>42</sub>O<sub>2</sub>: C, 77.24; H, 12.96; Found: C, 76.91; H, 13.22.

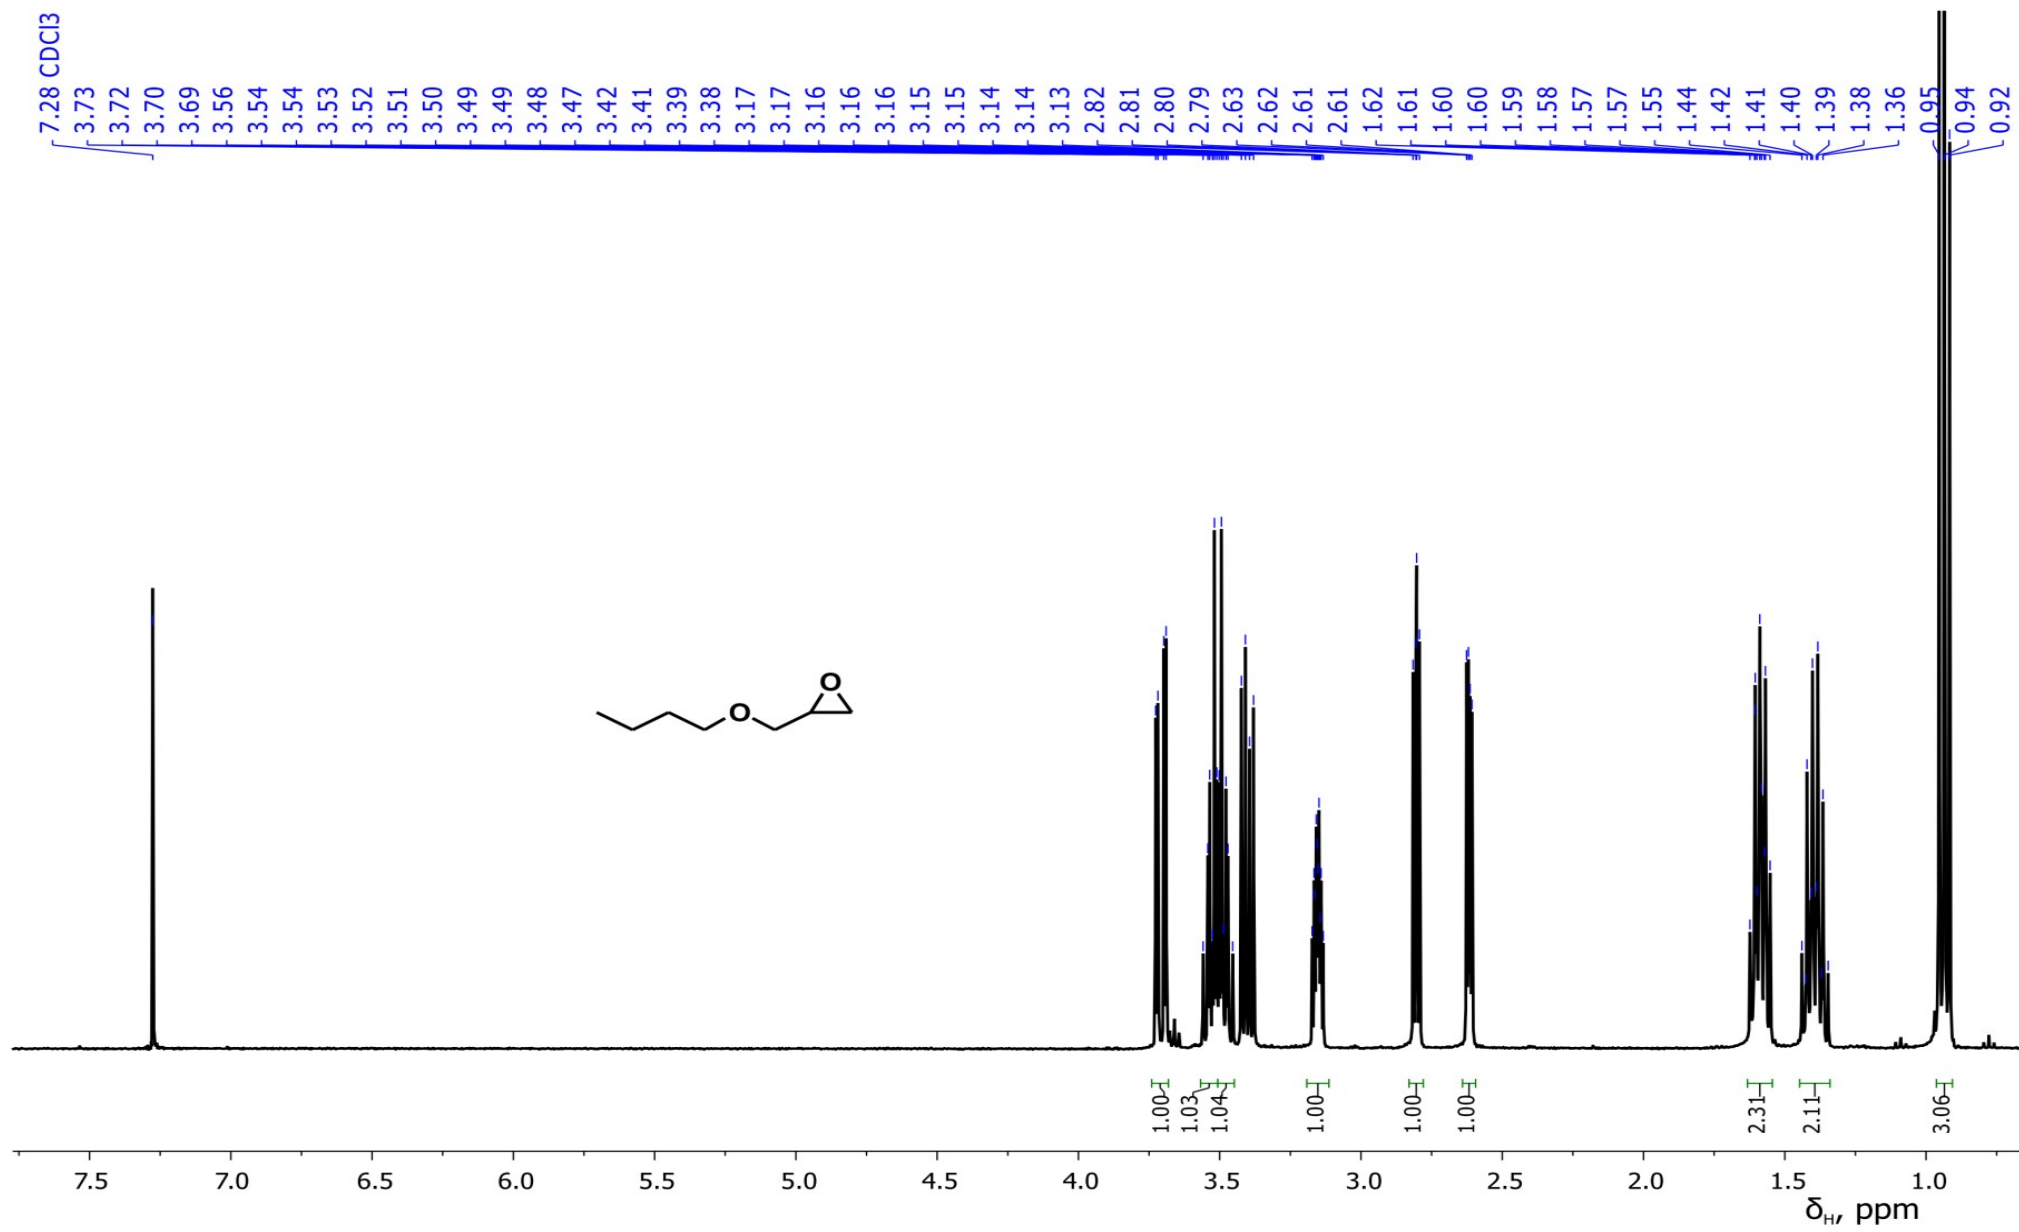

Figure S22.  $^1\text{H}$  NMR spectrum (400 MHz,  $\text{CDCl}_3$ ) of compound 1c.

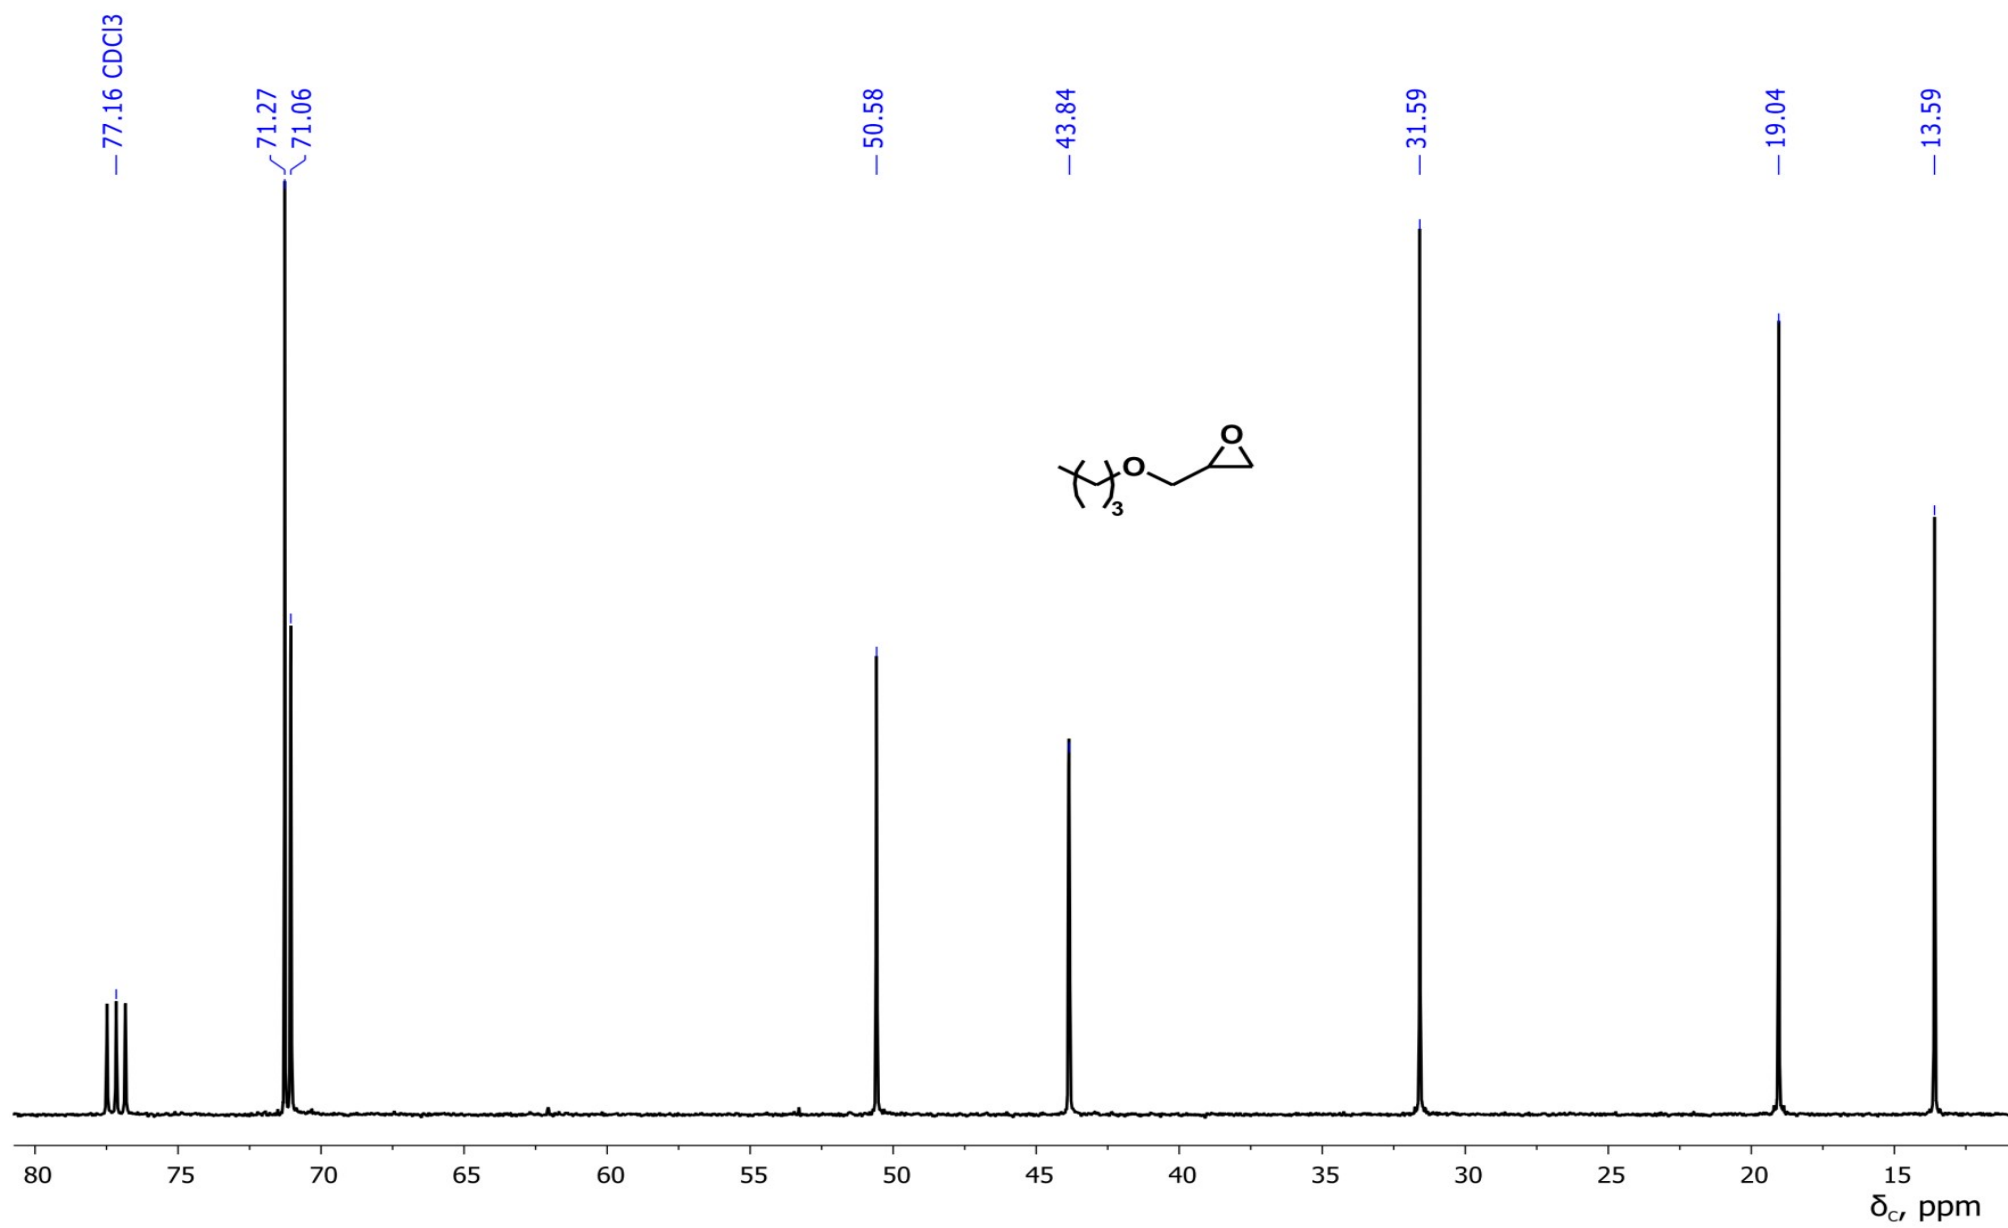

**Figure S23.**  $^{13}\text{C}$ - $\{^1\text{H}\}$  NMR spectrum (100.6 MHz,  $\text{CDCl}_3$ ) of compound **1c**.

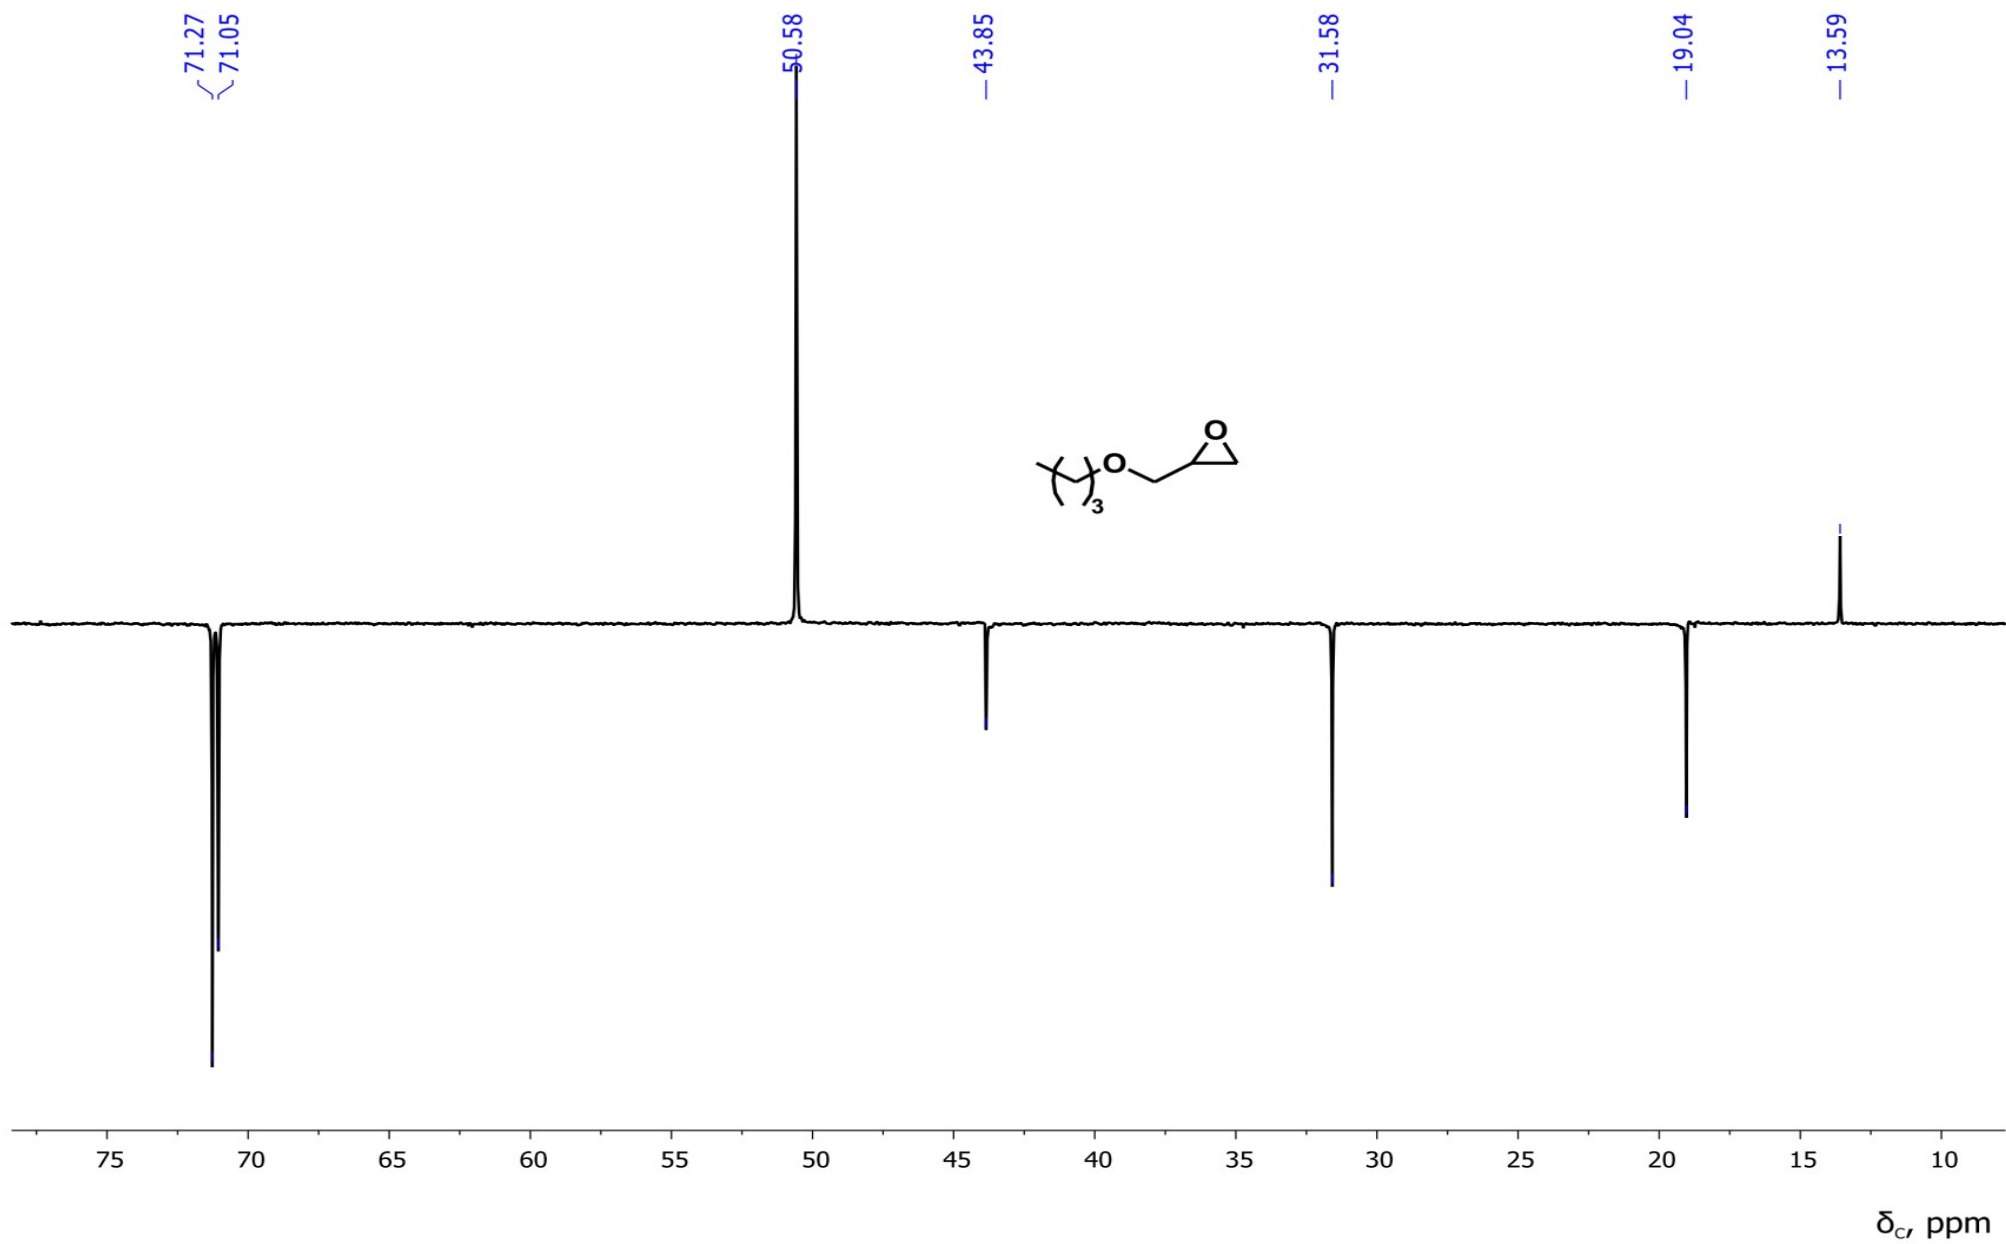

**Figure S24.**  $^{13}\text{C}$ - $\{^1\text{H}\}$  APT NMR spectrum (100.6 MHz,  $\text{CDCl}_3$ ) of compound **1c**.

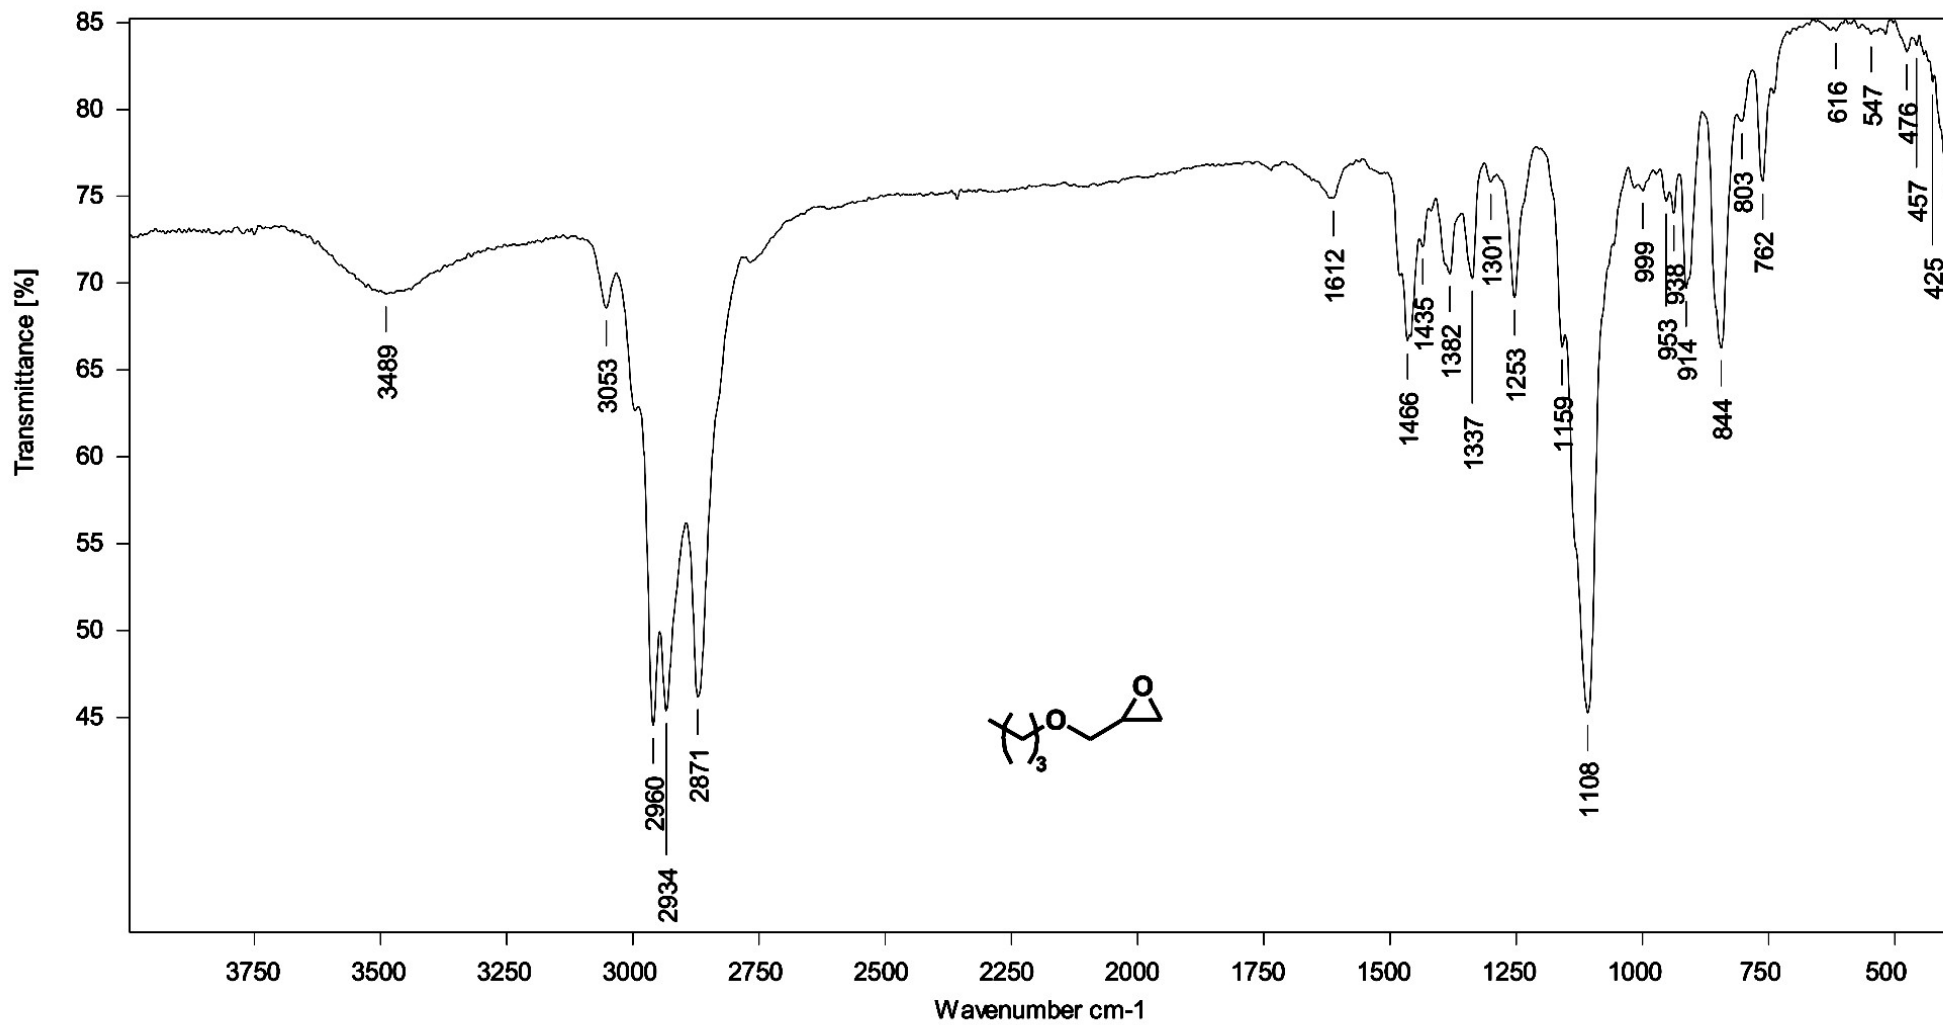

Figure S25. IR spectrum (film) of compound 1c.

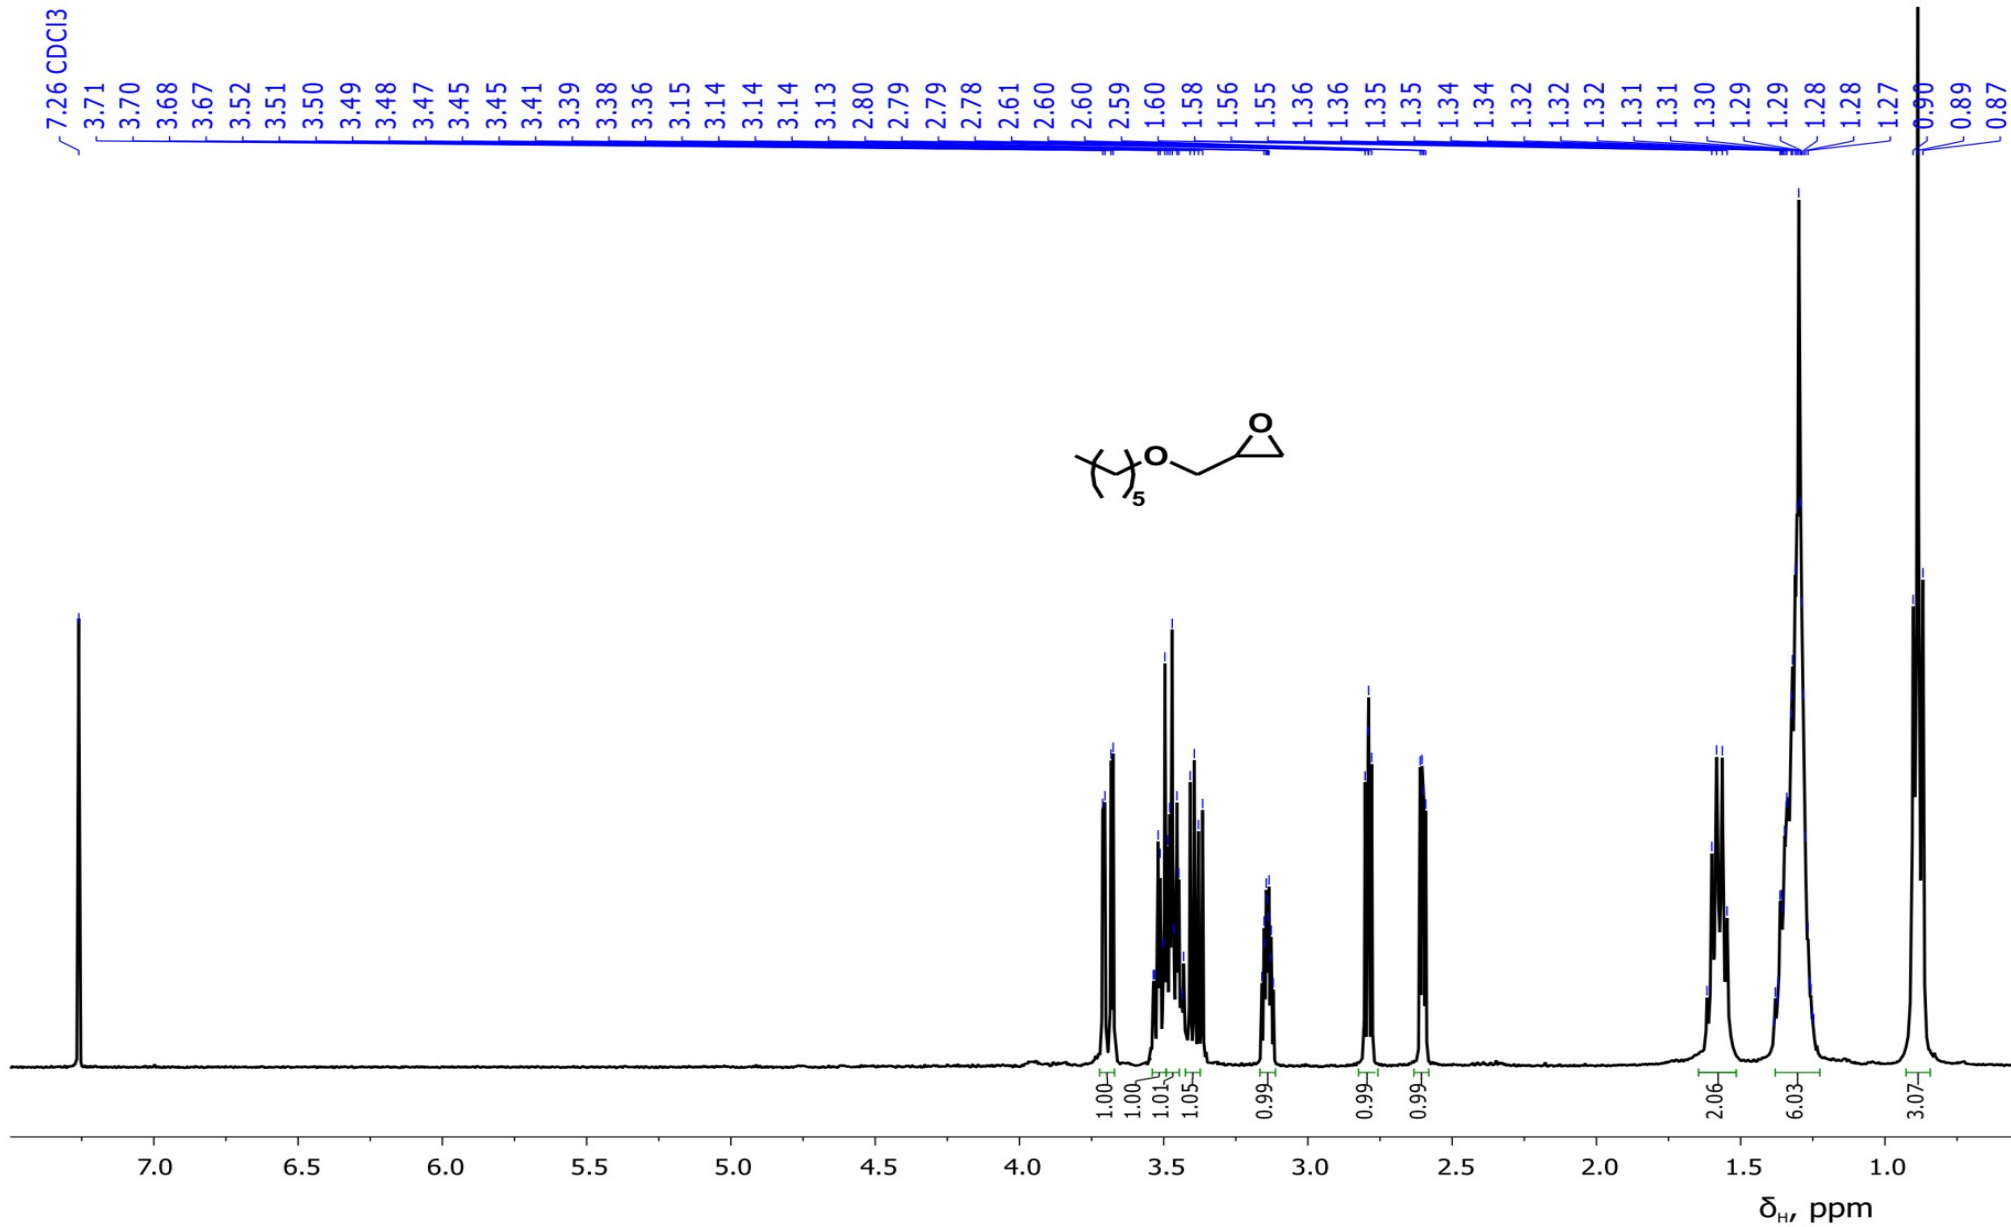

Figure S26.  $^1\text{H}$  NMR spectrum(400 MHz,  $\text{CDCl}_3$ ) of compound **1d**.



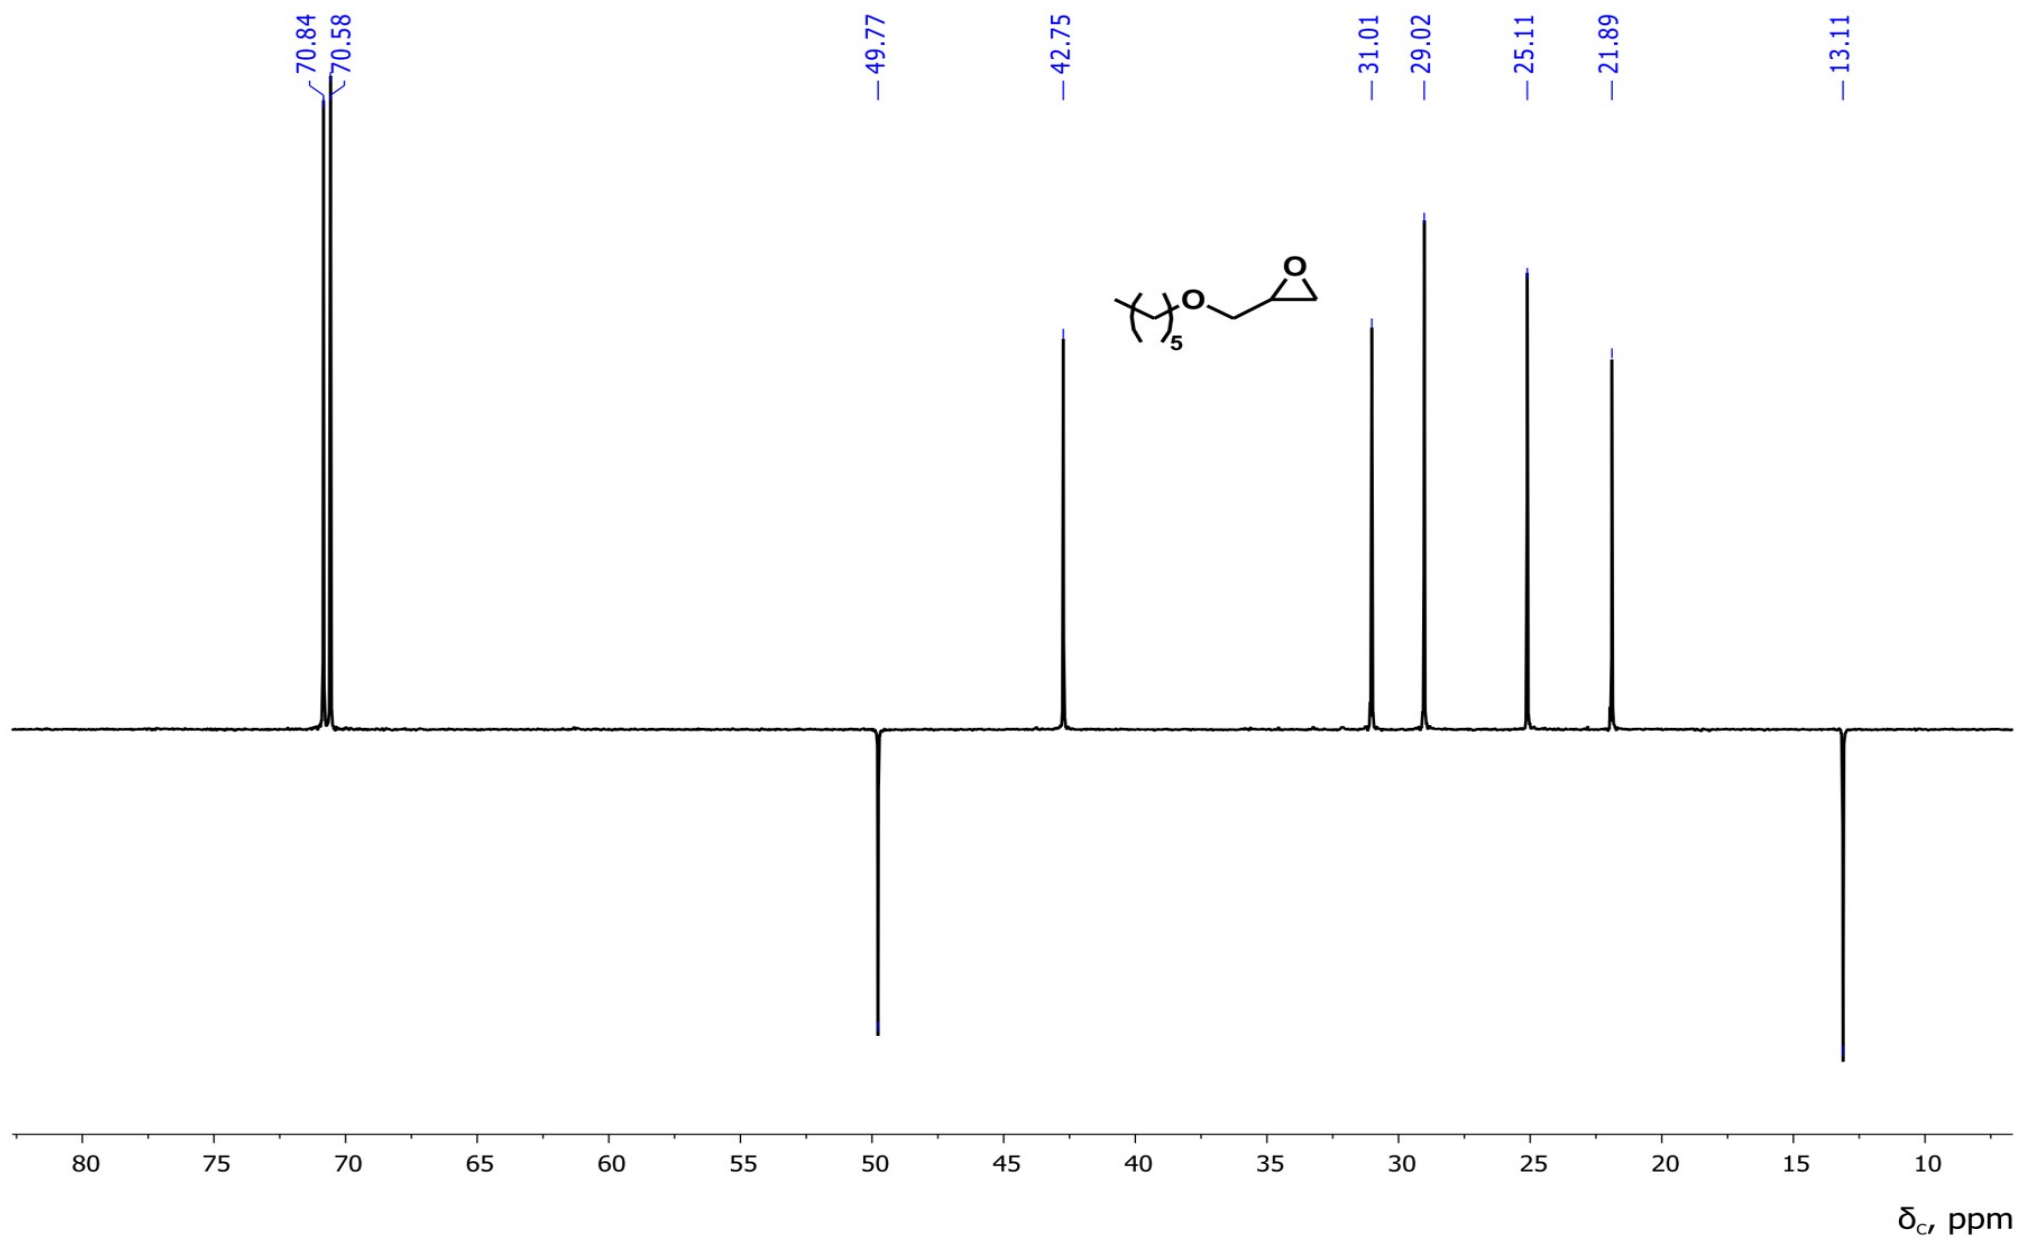

**Figure S28.**  $^{13}\text{C}$ - $\{^1\text{H}\}$  APT NMR spectrum (100.6 MHz,  $\text{CDCl}_3$ ) of compound **1d**.

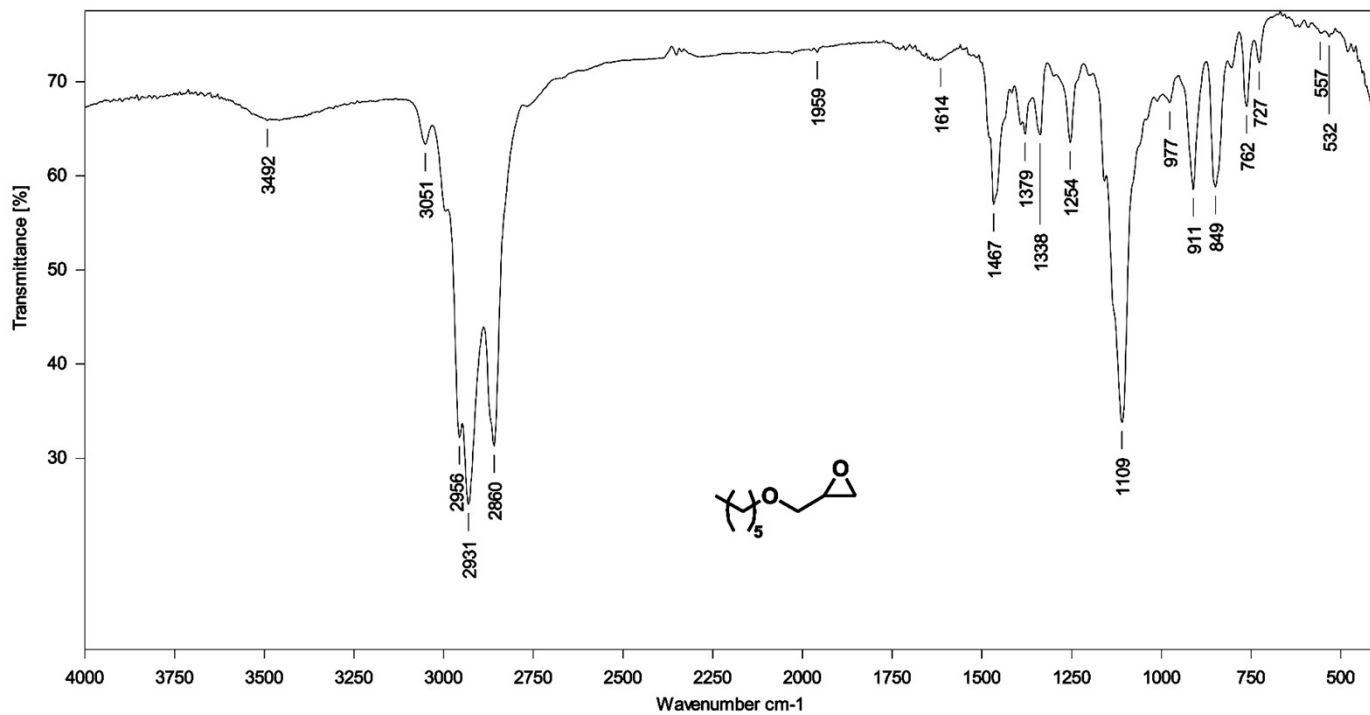

Figure S29. IR spectrum (film) of compound 1d.

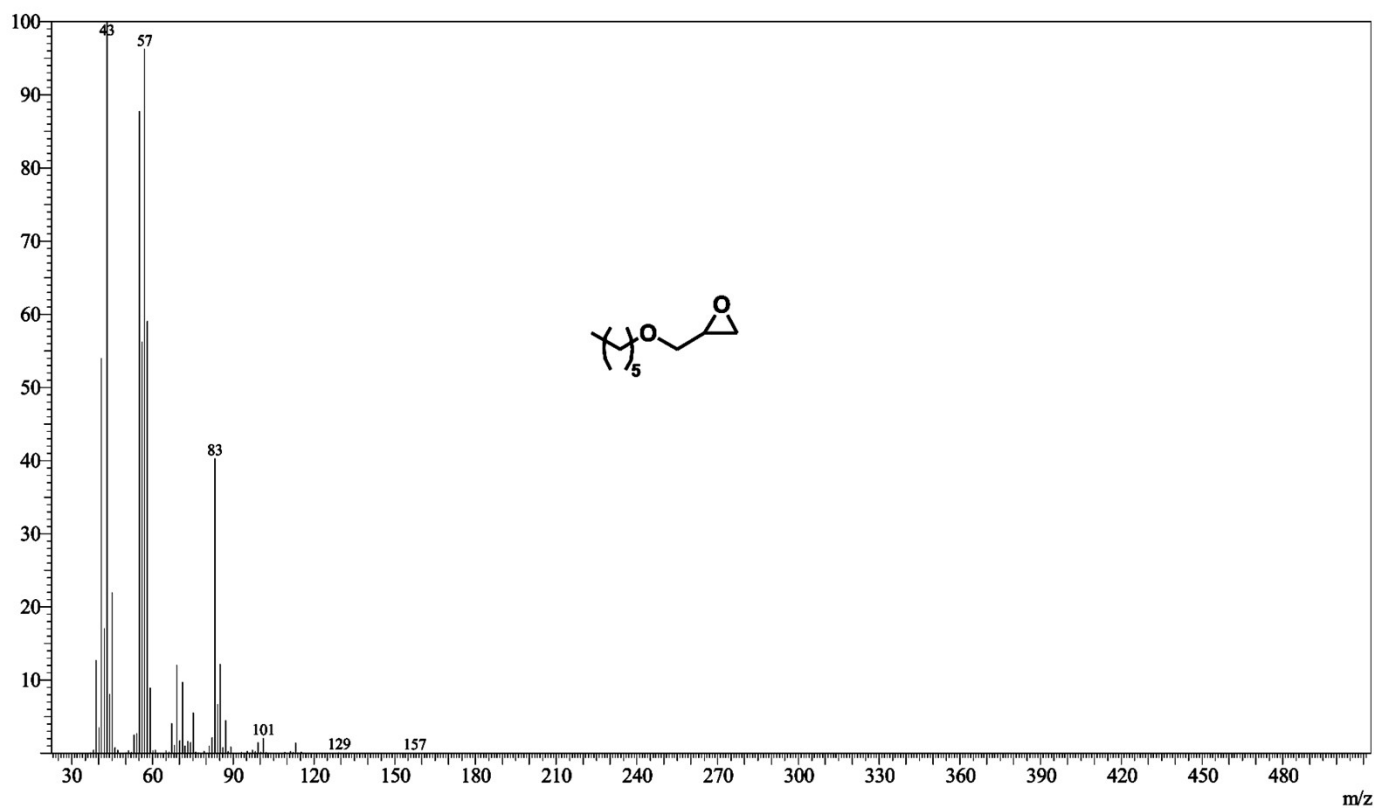

Figure S30. EI-MS spectrum of compound 1d.

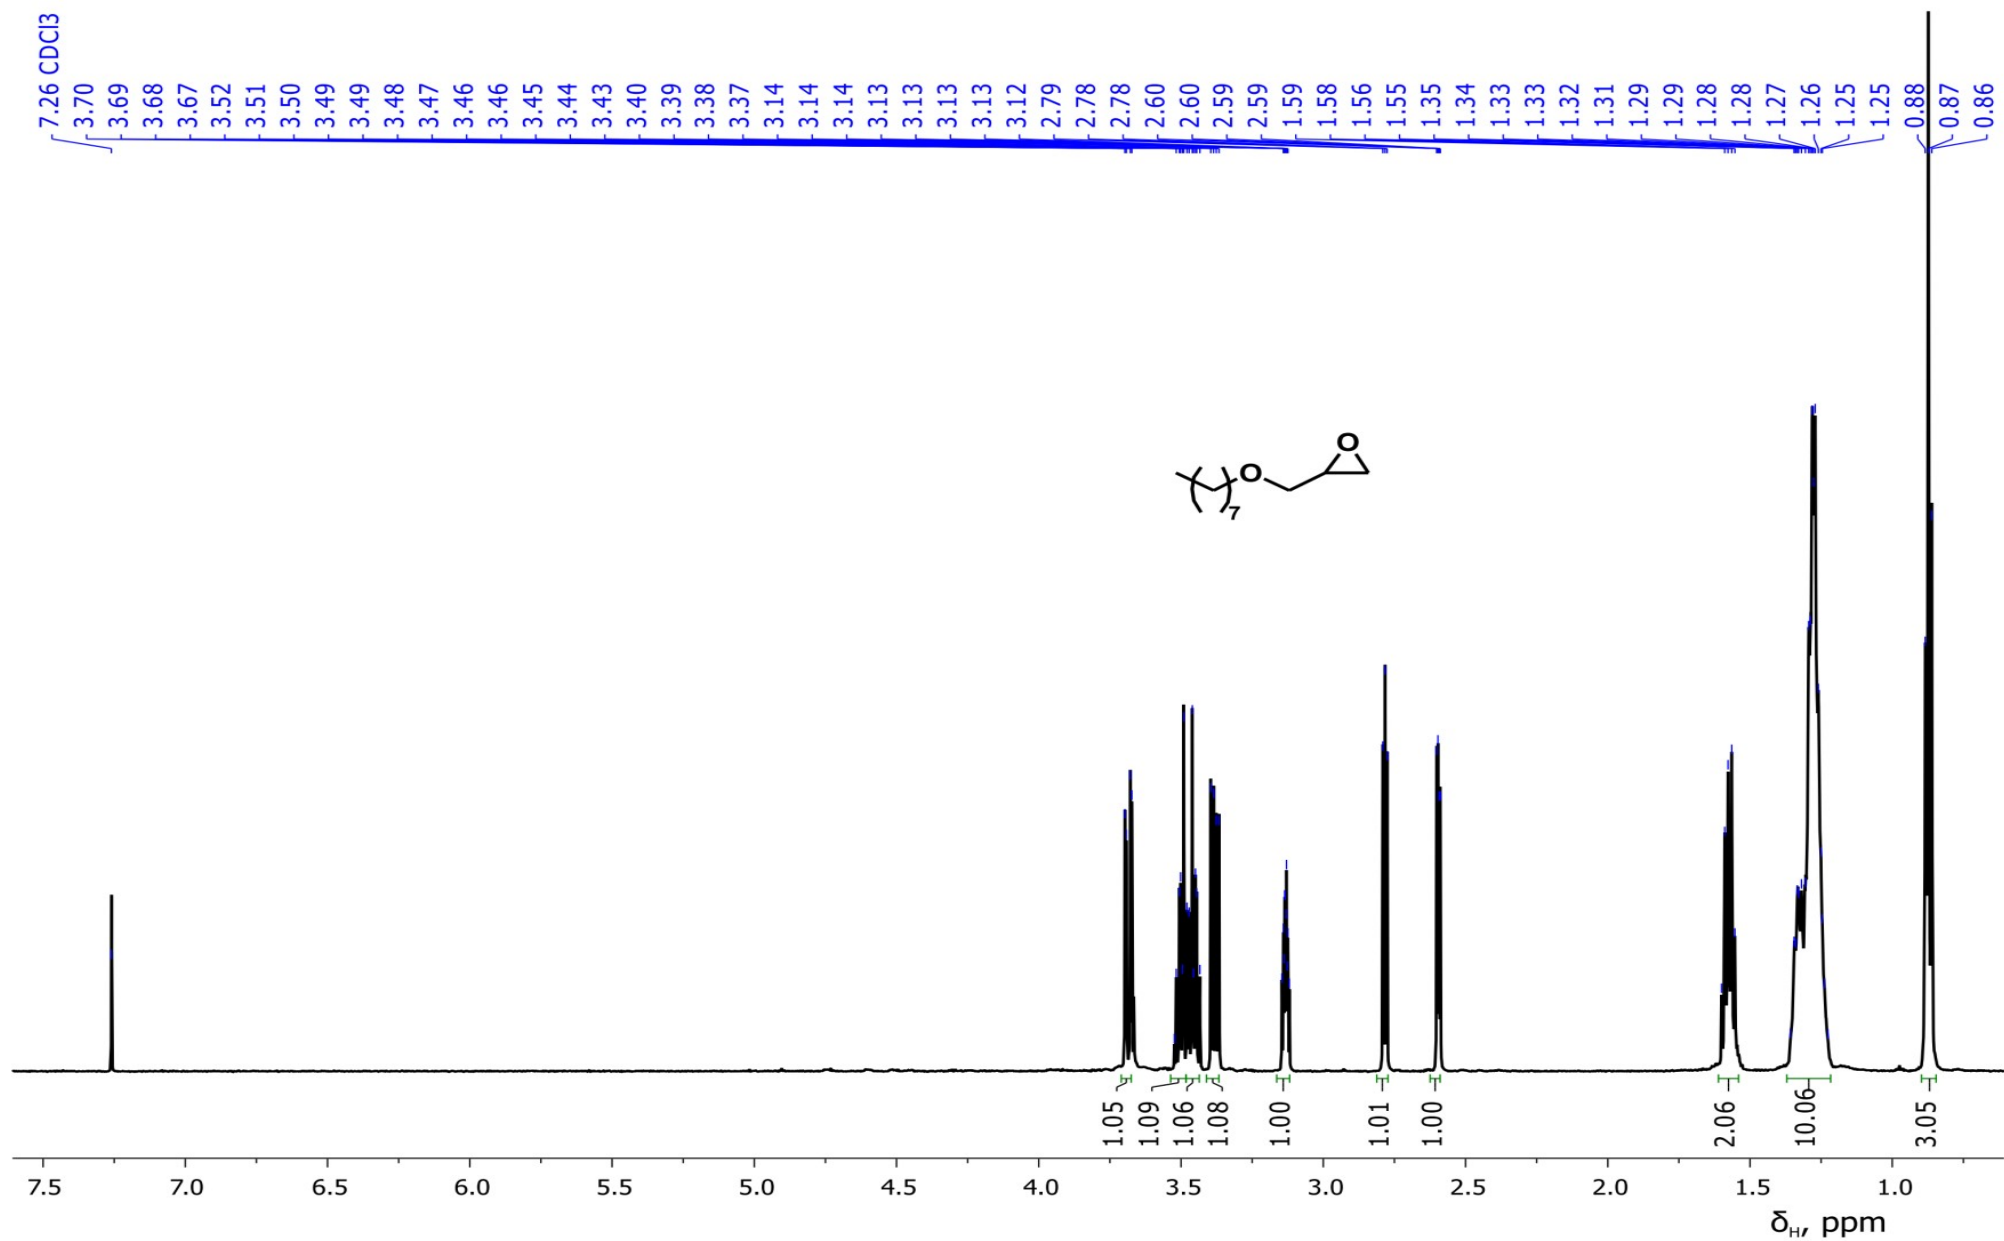

Figure S31. <sup>1</sup>H NMR spectrum (400 MHz, CDCl<sub>3</sub>) of compound 1e.

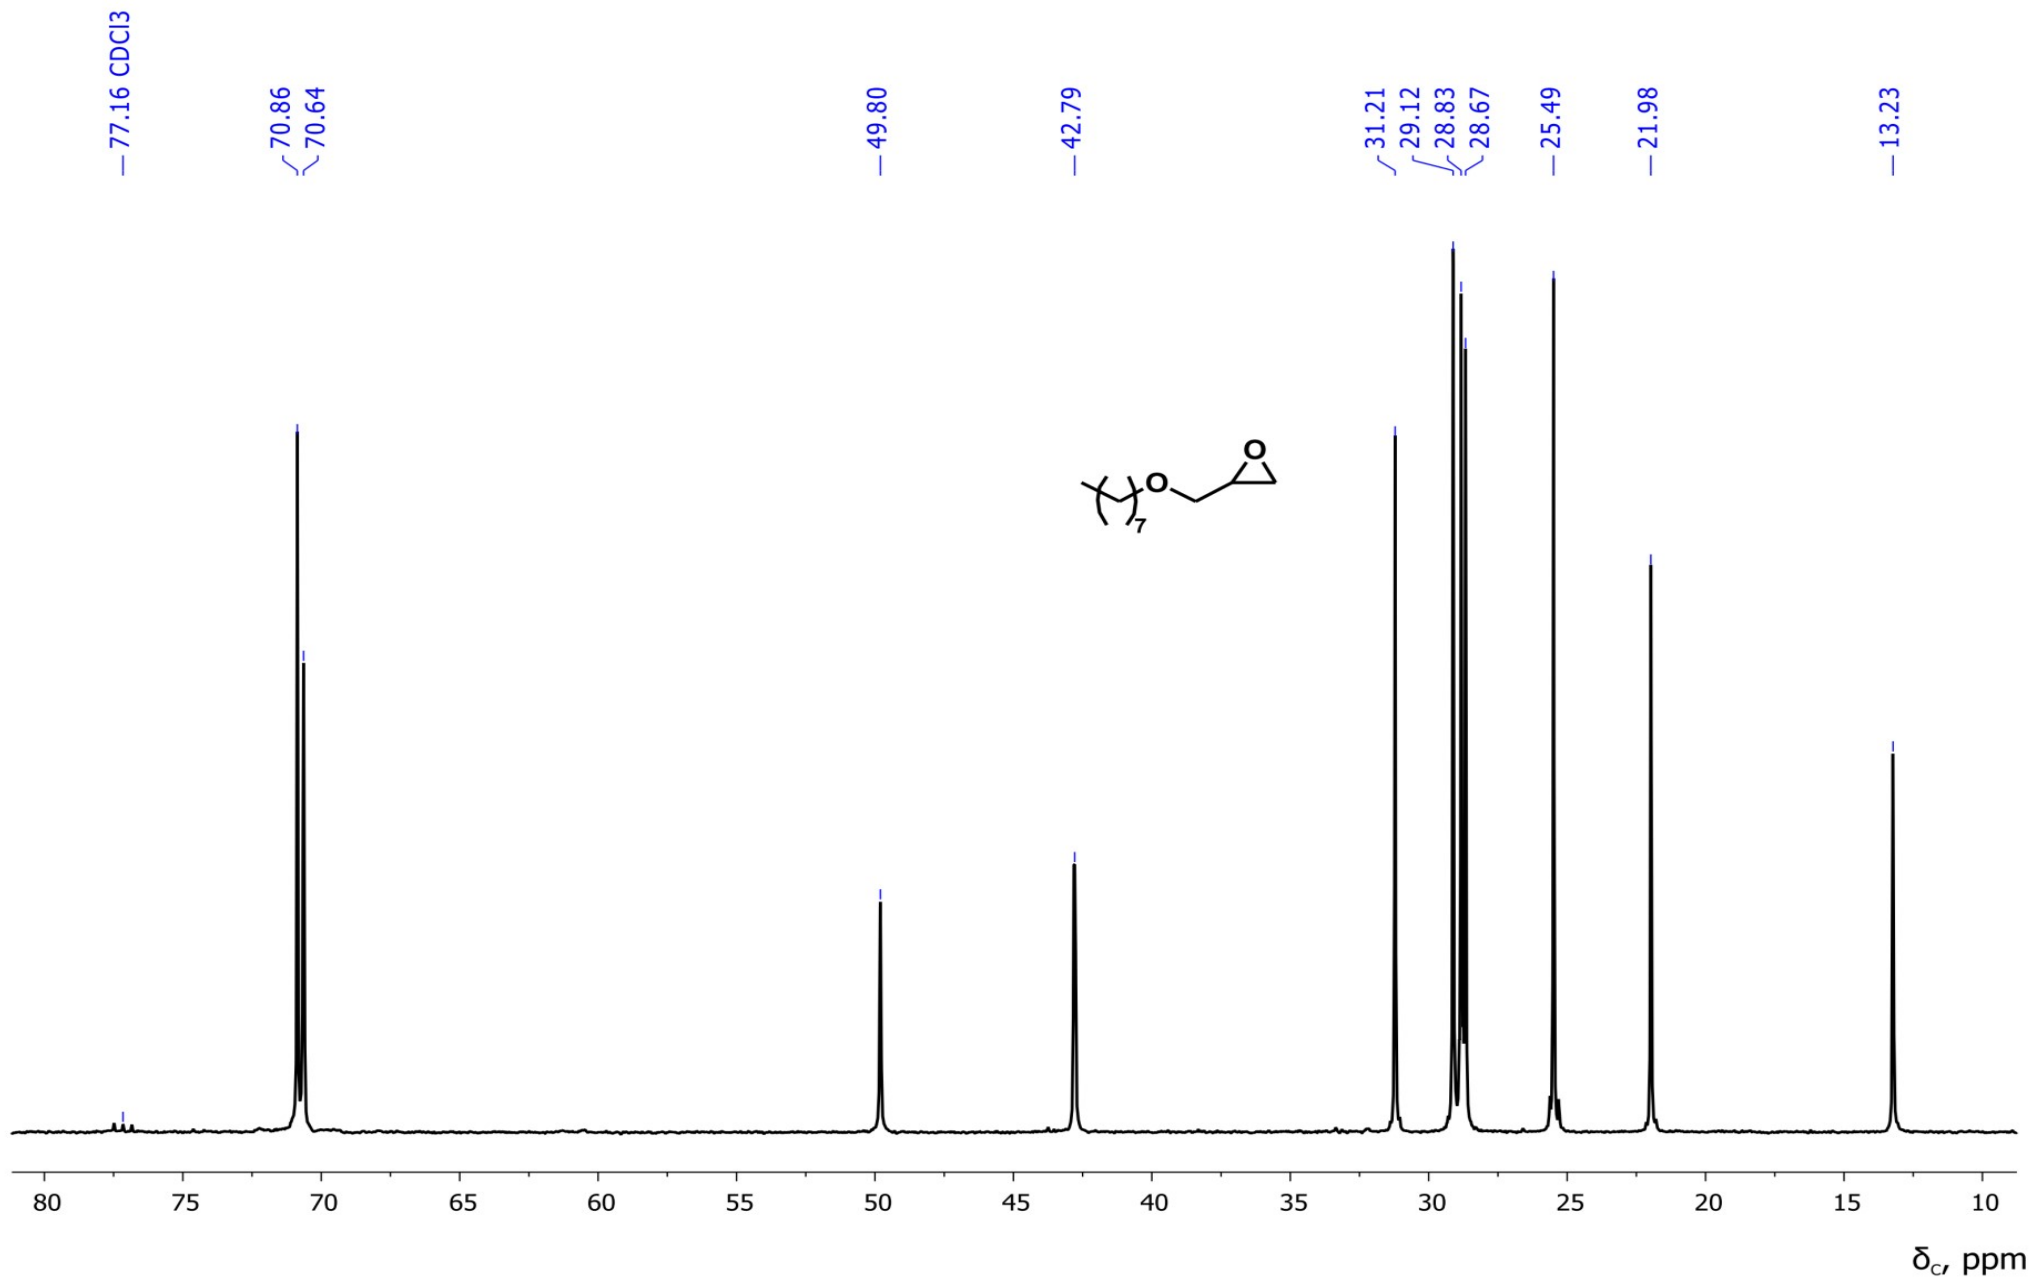

**Figure S32.**  $^{13}\text{C}$ - $\{^1\text{H}\}$  NMR spectrum (100.6 MHz,  $\text{CDCl}_3$ ) of compound **1e**.

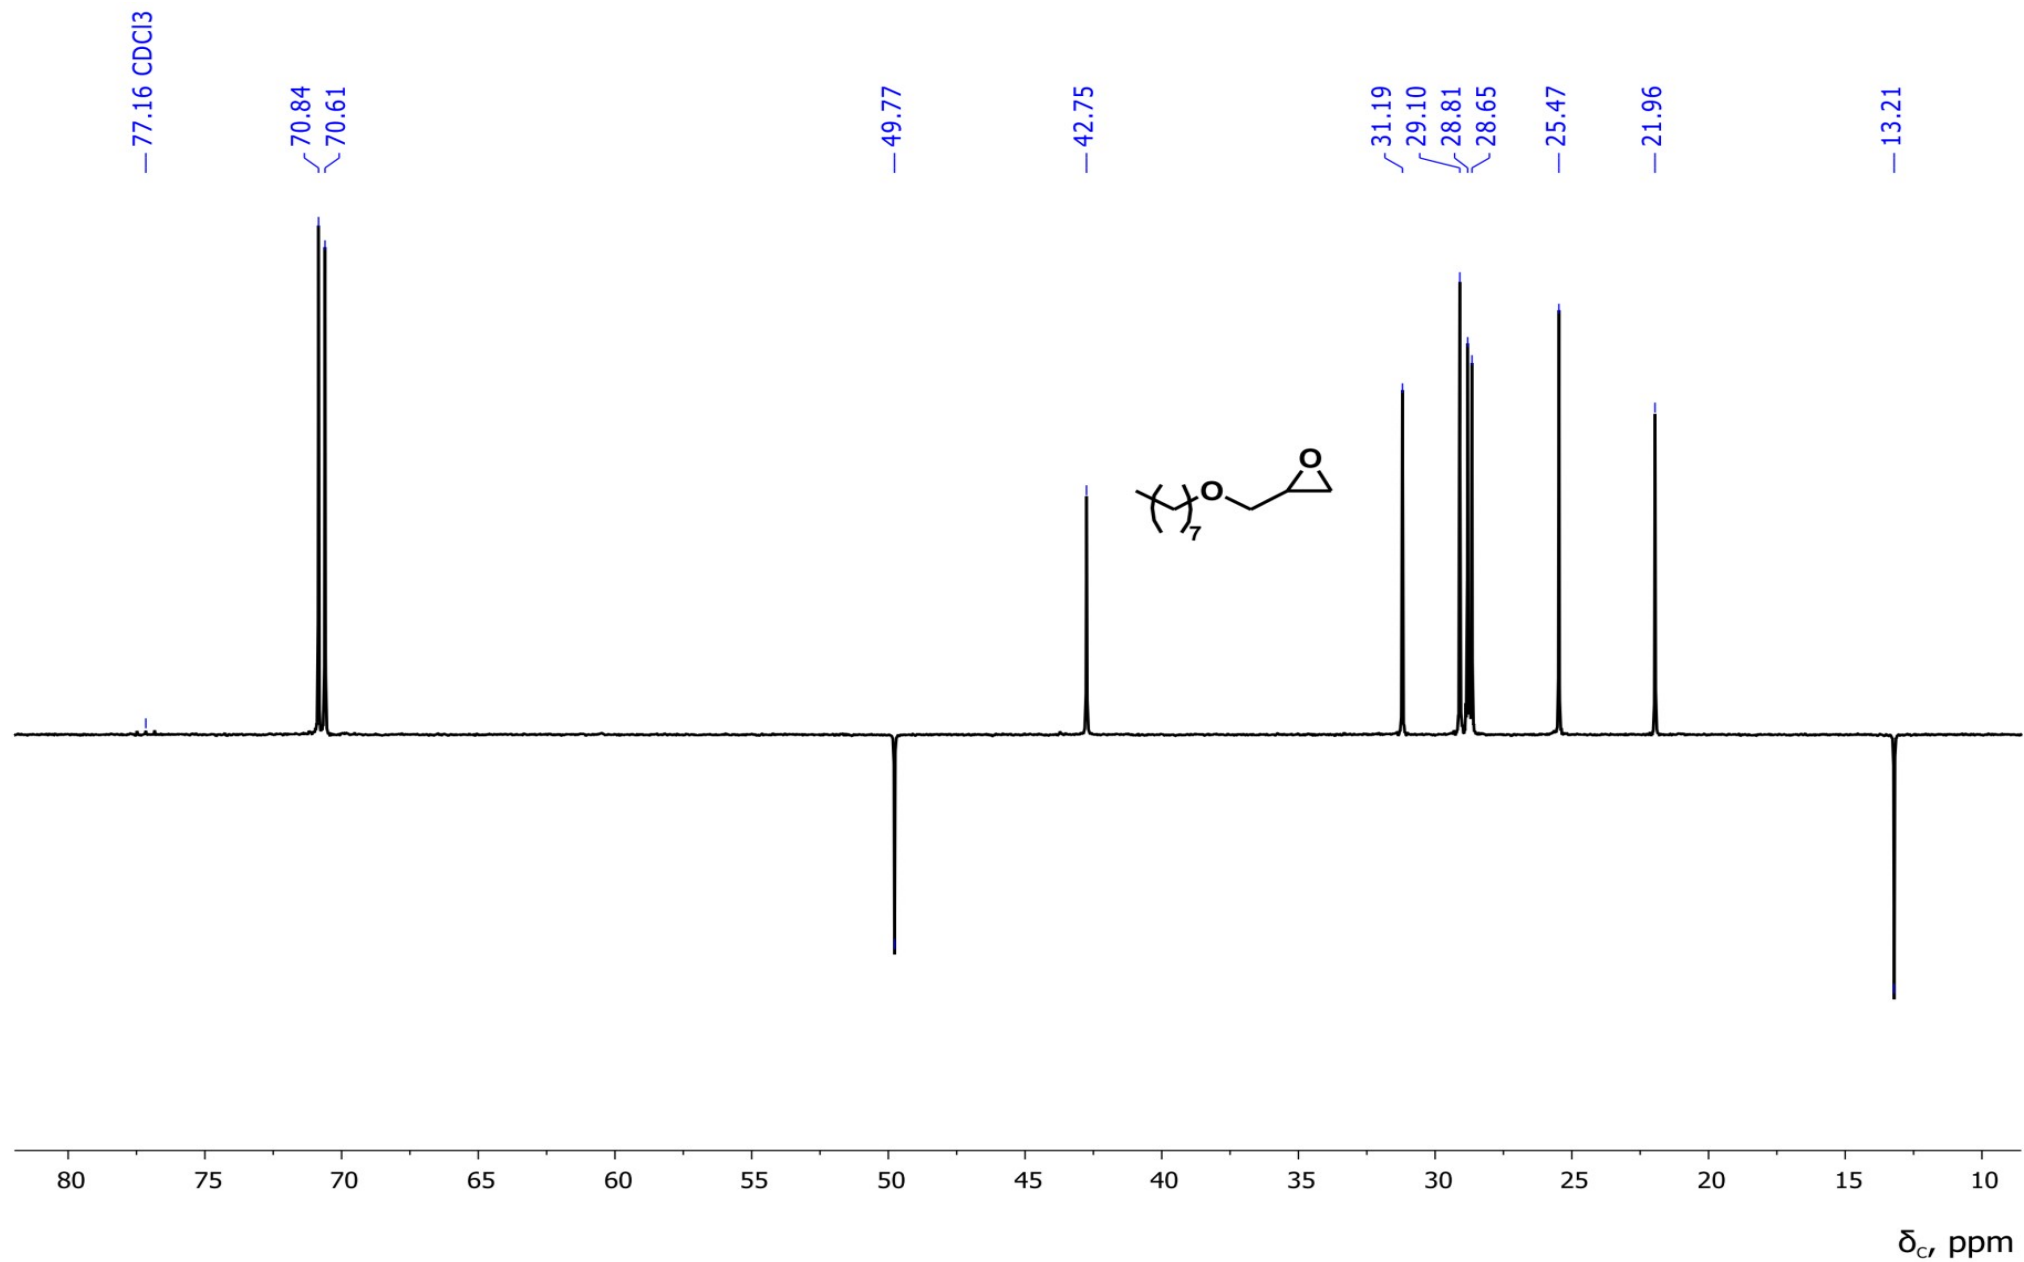

**Figure S33.** <sup>13</sup>C-<sup>1</sup>H} APT NMR spectrum (100.6 MHz, CDCl<sub>3</sub>) of compound **1e**.

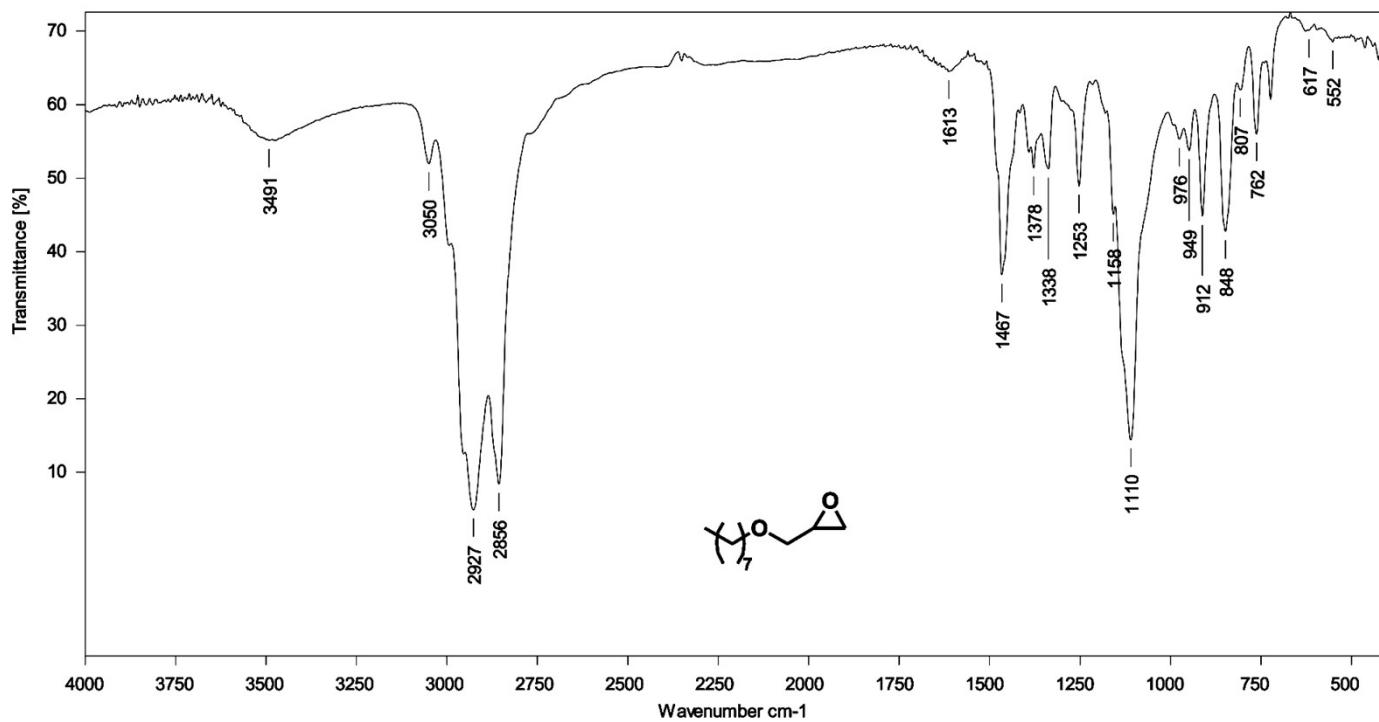

Figure S34. IR spectrum (film) of compound **1e**.

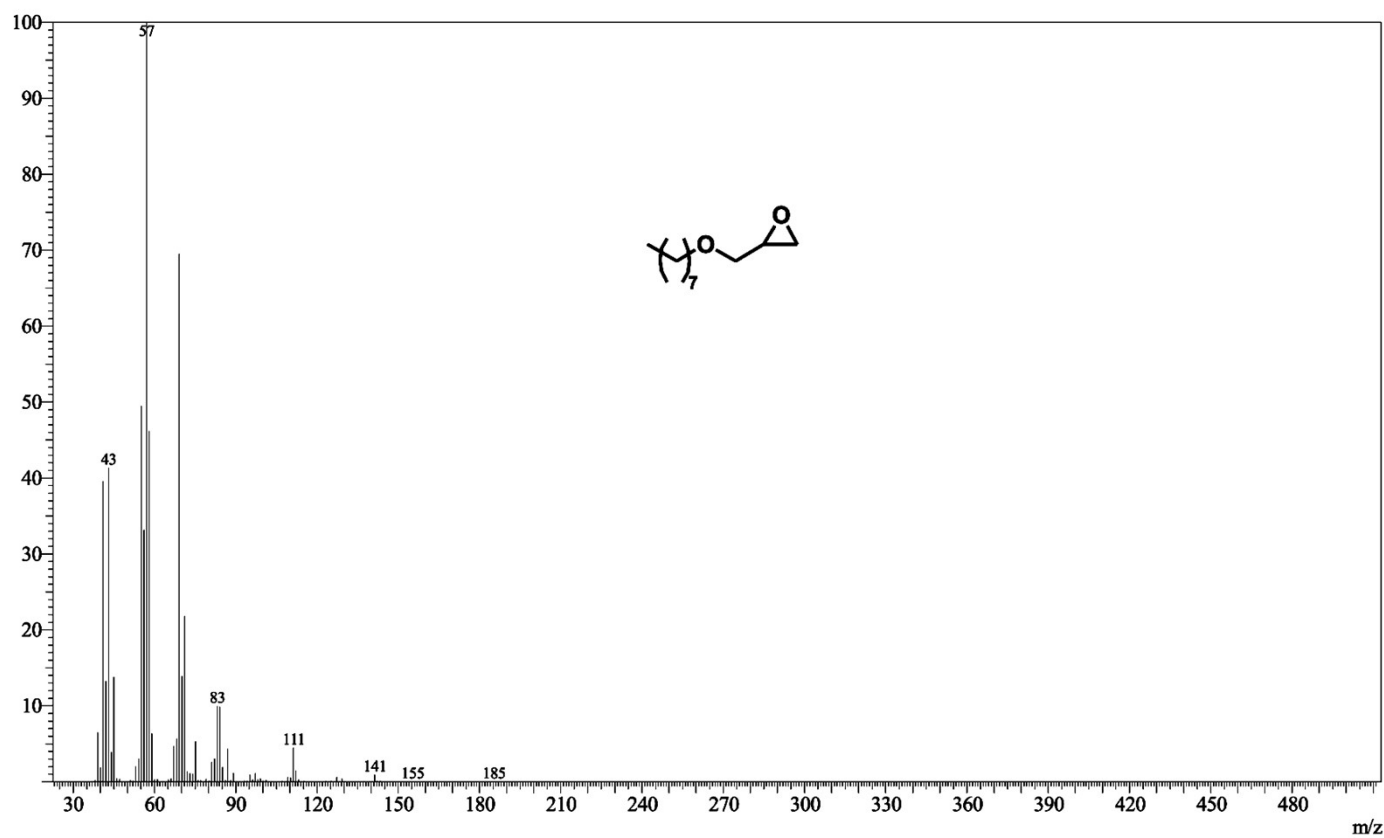

Figure S35. EI-MS spectrum of compound **1e**.

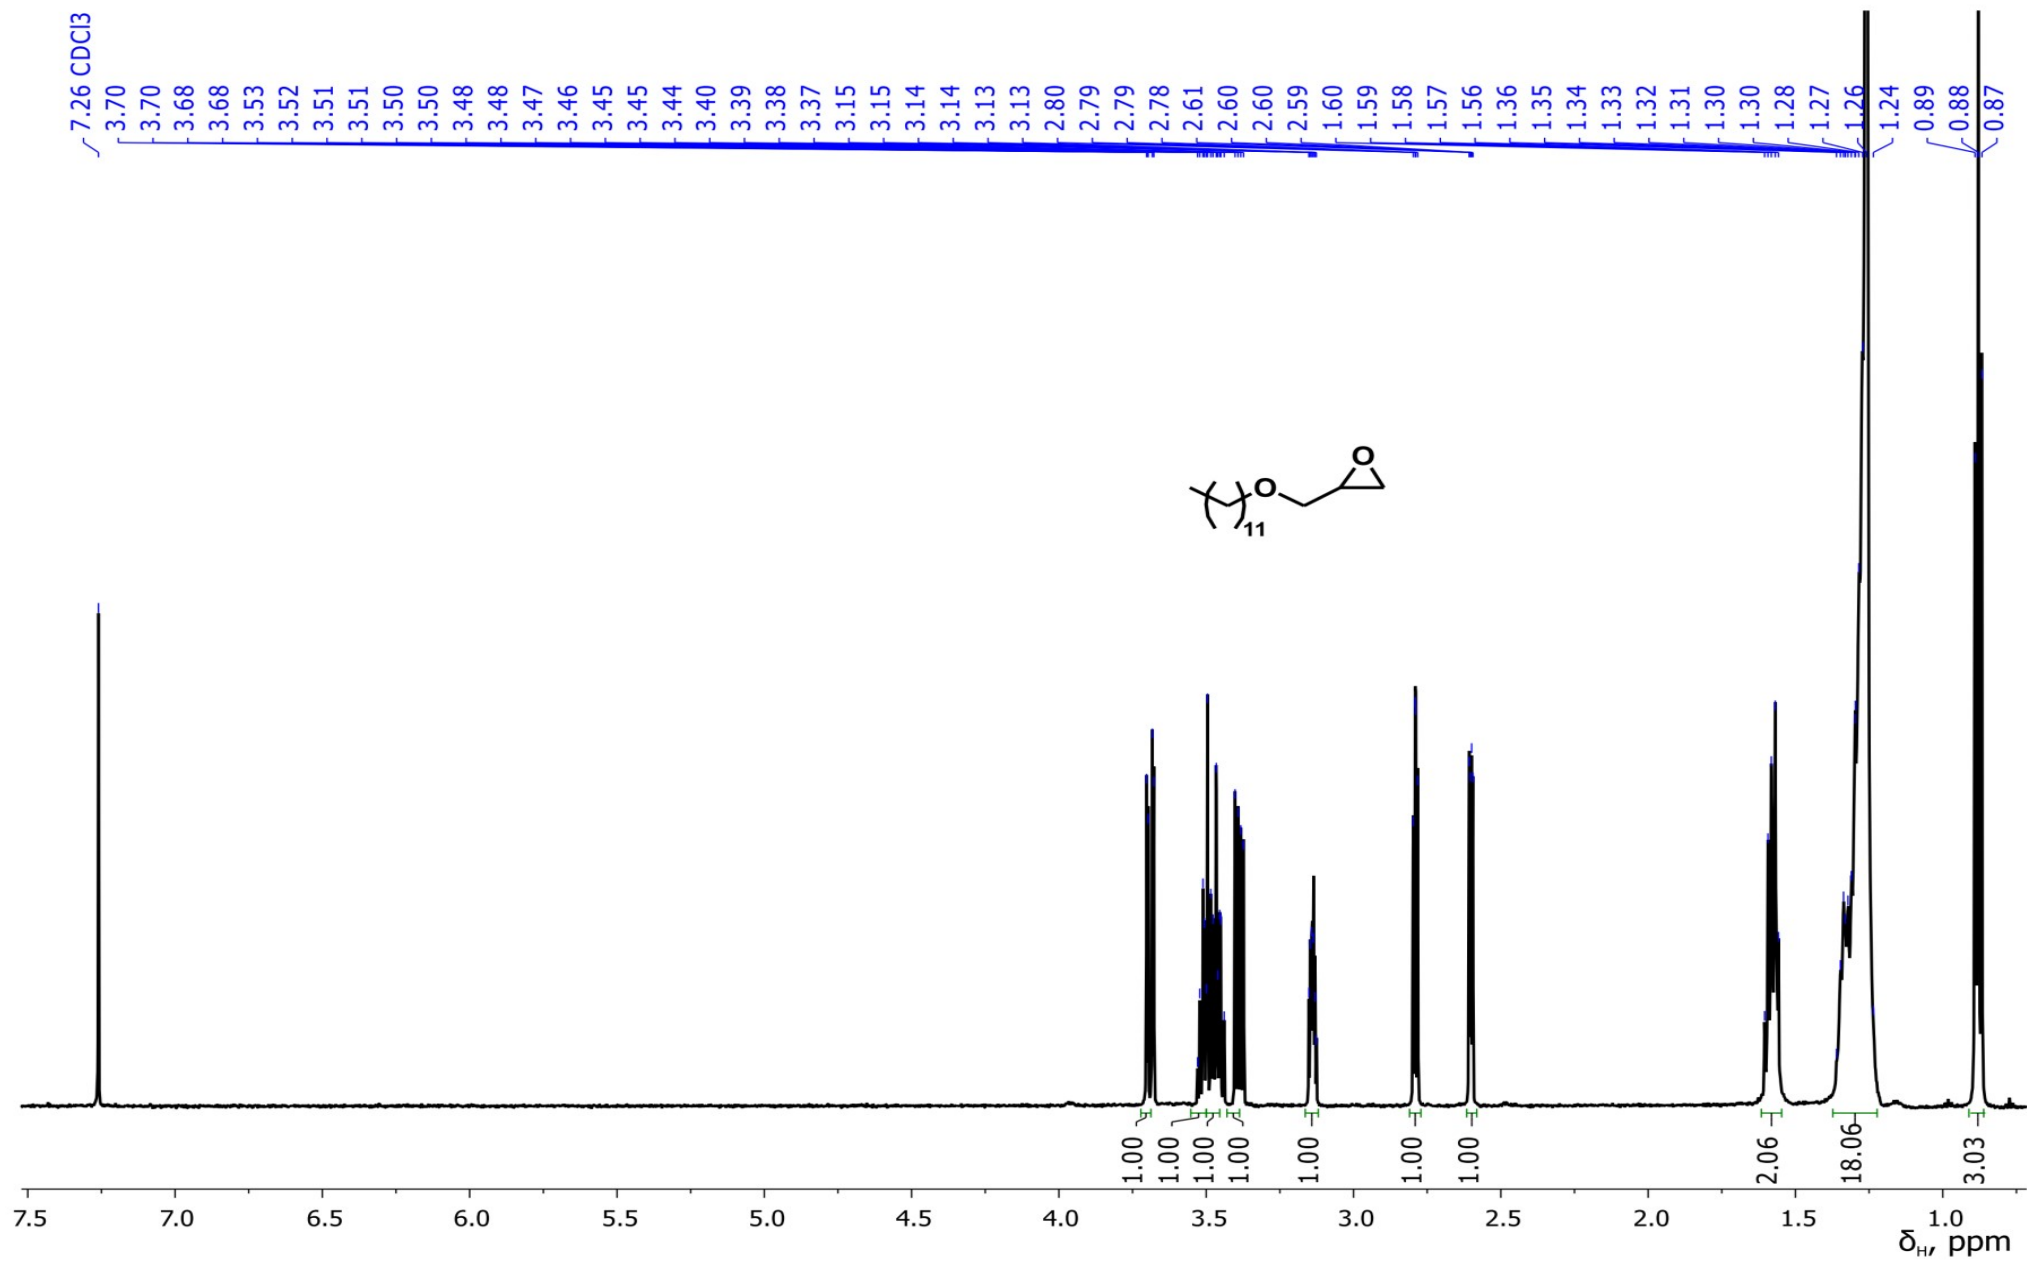

**Figure S36.** <sup>1</sup>H NMR spectrum (400 MHz, CDCl<sub>3</sub>) of compound **1g**.

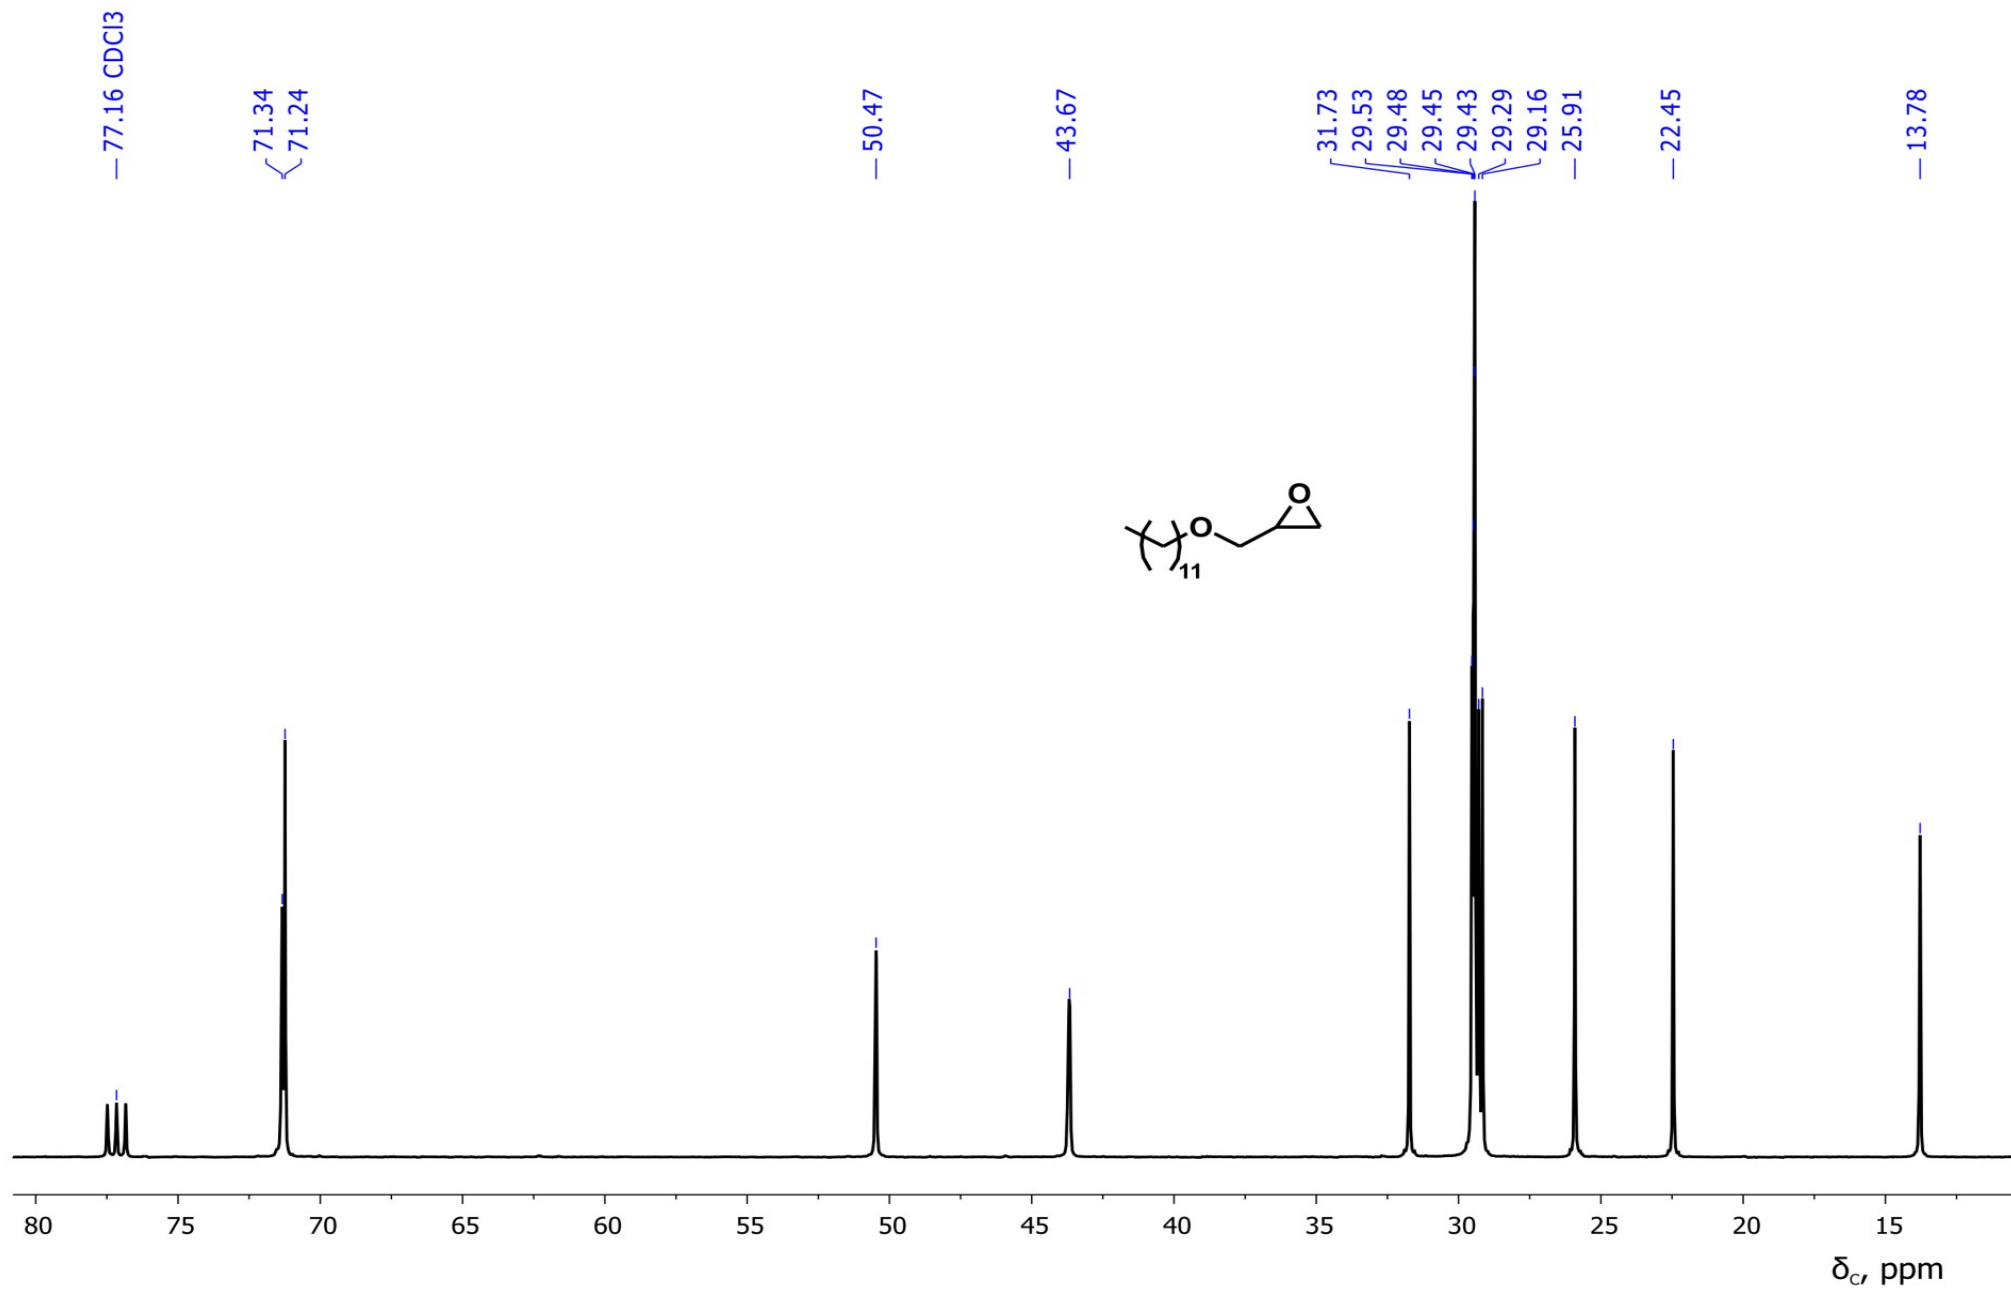

Figure S37. <sup>13</sup>C-<sup>1</sup>H NMR spectrum (100.6 MHz, CDCl<sub>3</sub>) of compound **1g**.



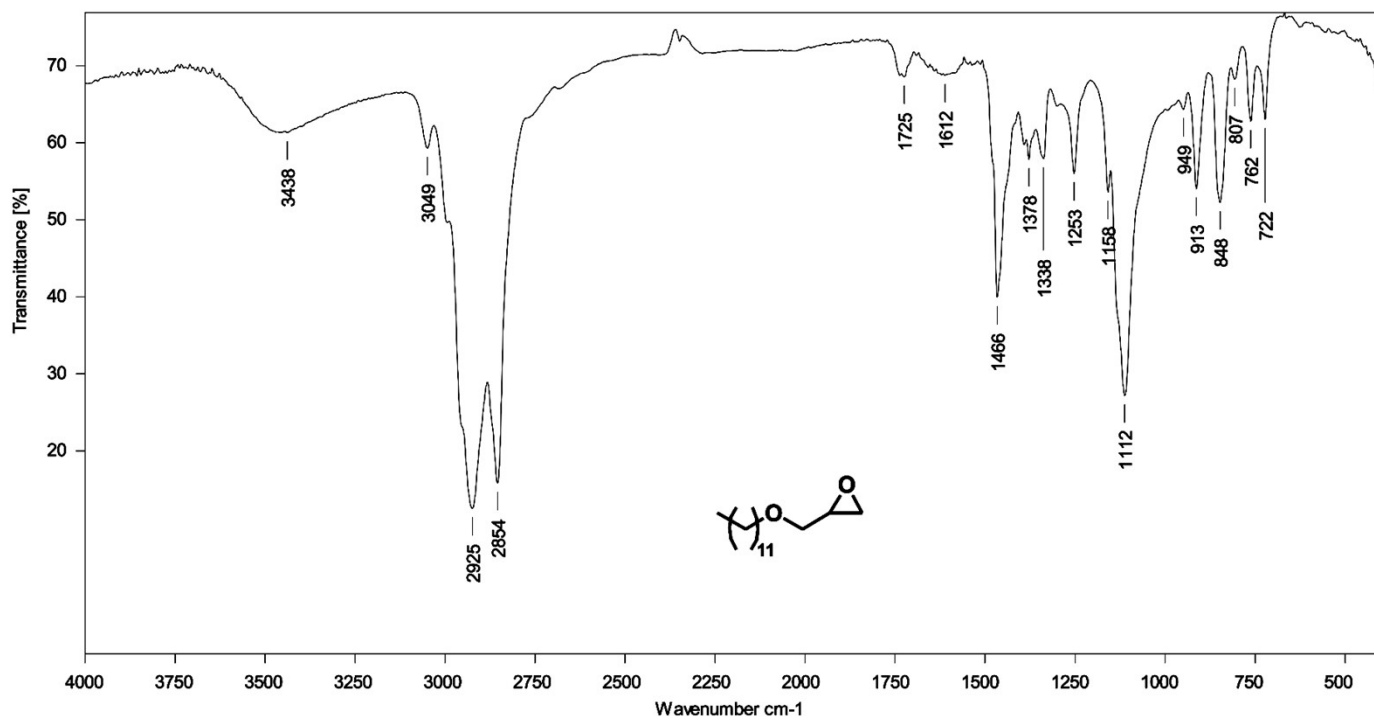

Figure S39. IR spectrum (film) of compound **1g**.

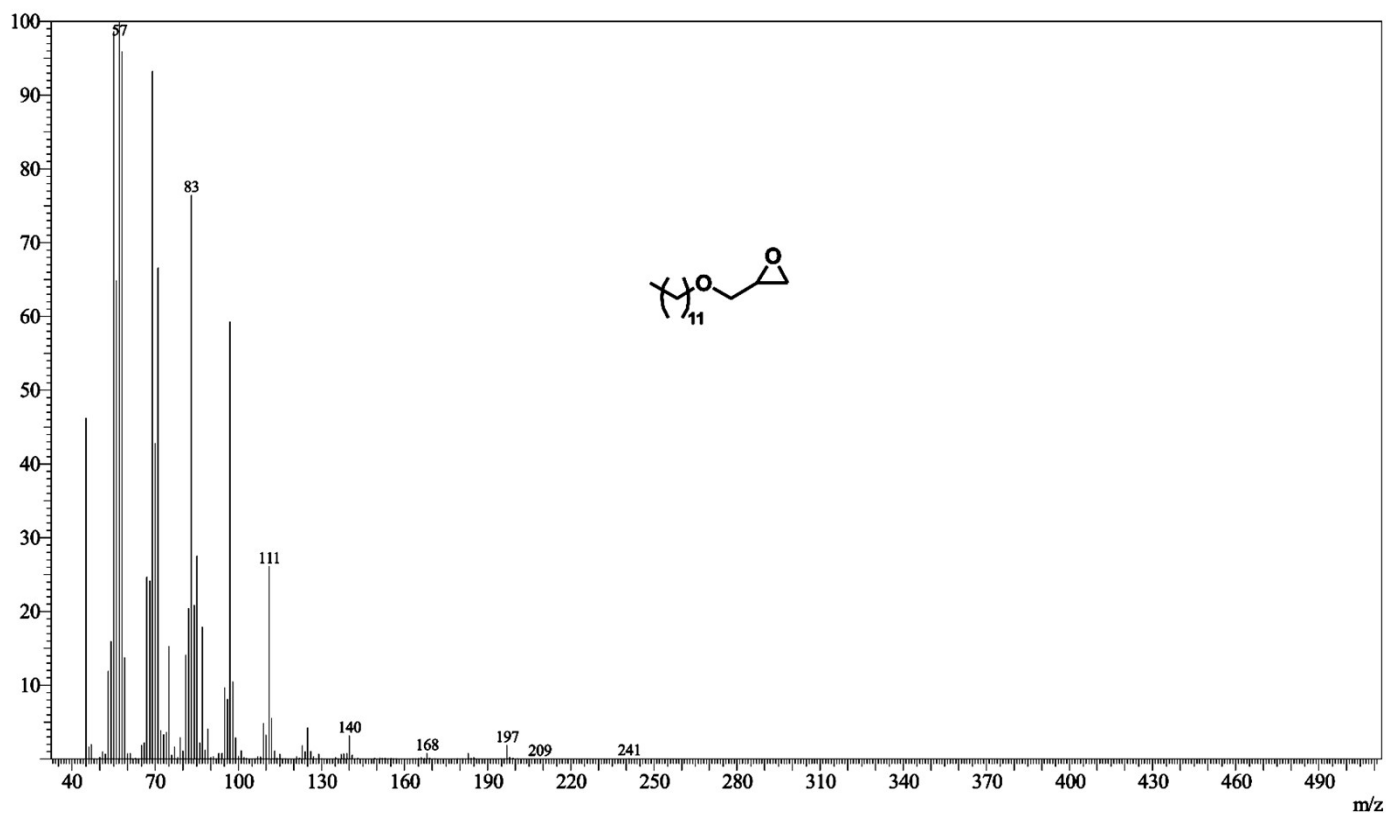

Figure S40. EI-MS spectrum of compound **1g**.

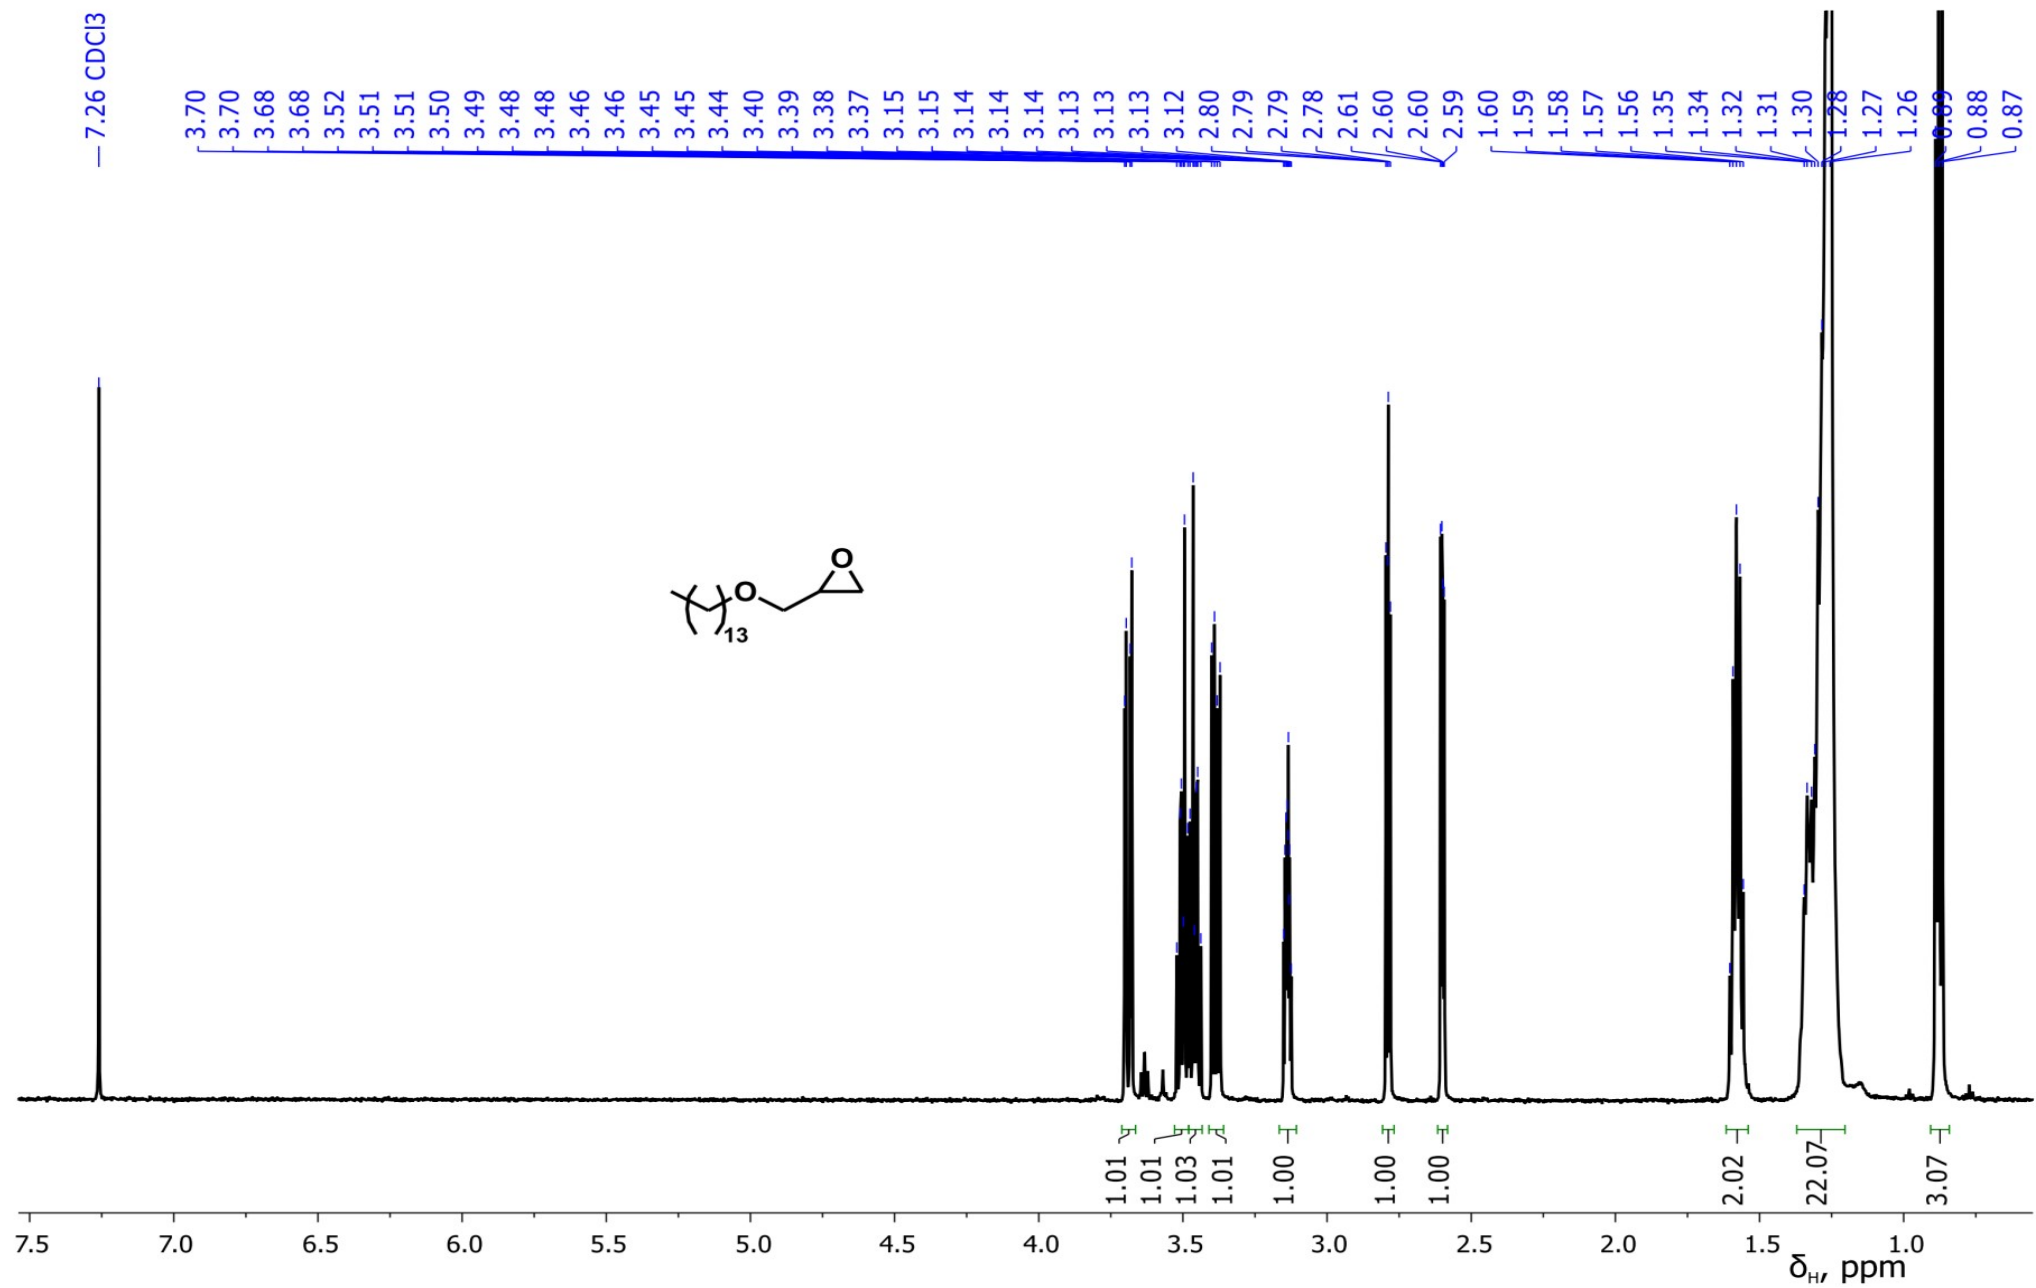

Figure S41. <sup>1</sup>H NMR spectrum (400 MHz, CDCl<sub>3</sub>) of compound **1h**.

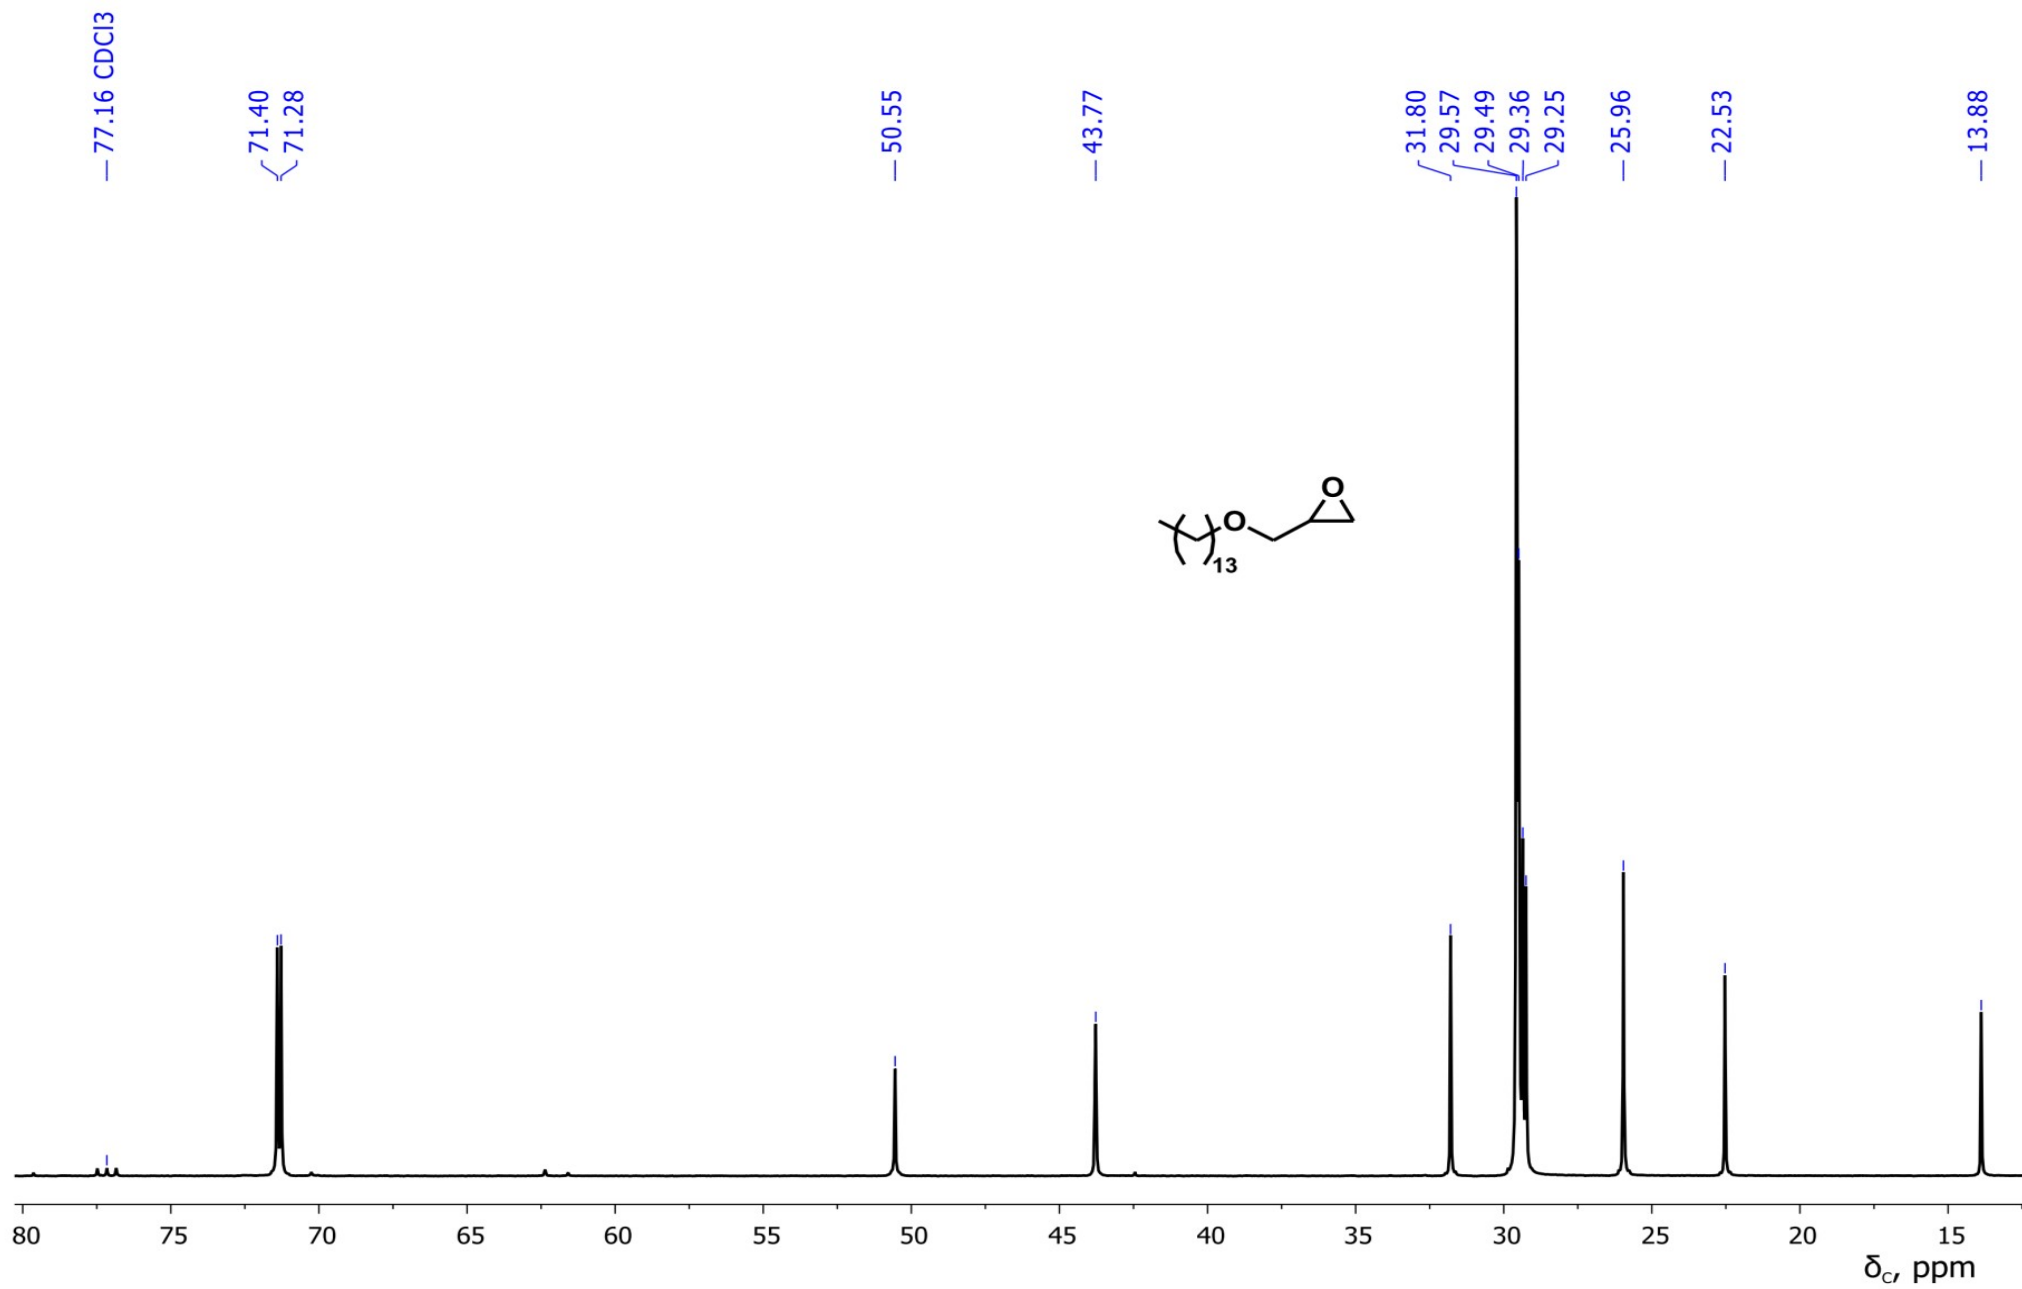

Figure S42.  $^{13}\text{C}$ - $\{^1\text{H}\}$  NMR spectrum (100.6 MHz,  $\text{CDCl}_3$ ) of compound **1h**.

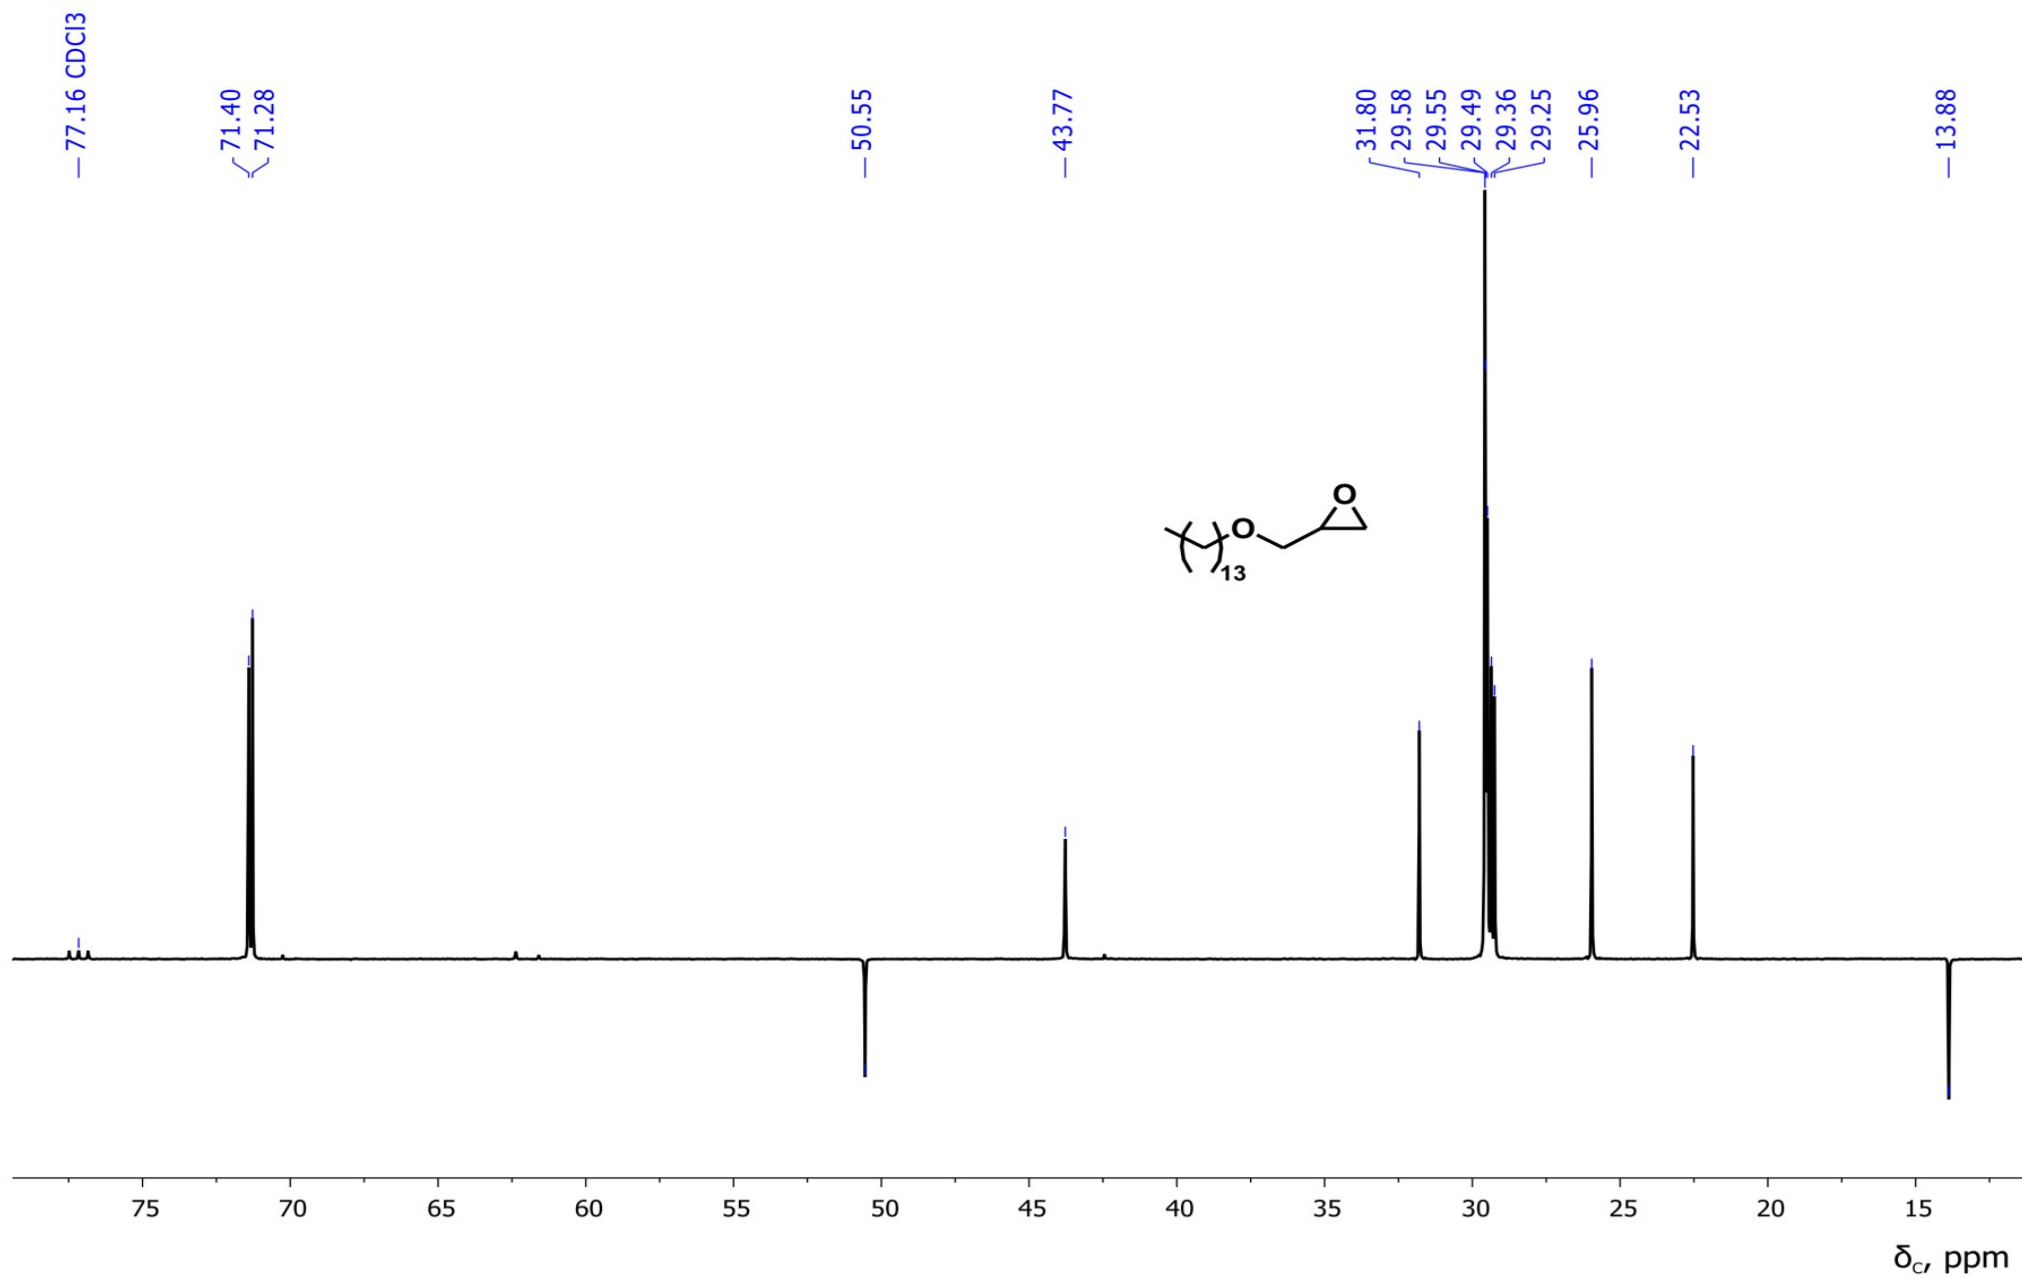

**Figure S43.**  $^{13}\text{C}$ - $\{^1\text{H}\}$  APT NMR spectrum (100.6 MHz,  $\text{CDCl}_3$ ) of compound **1h**.

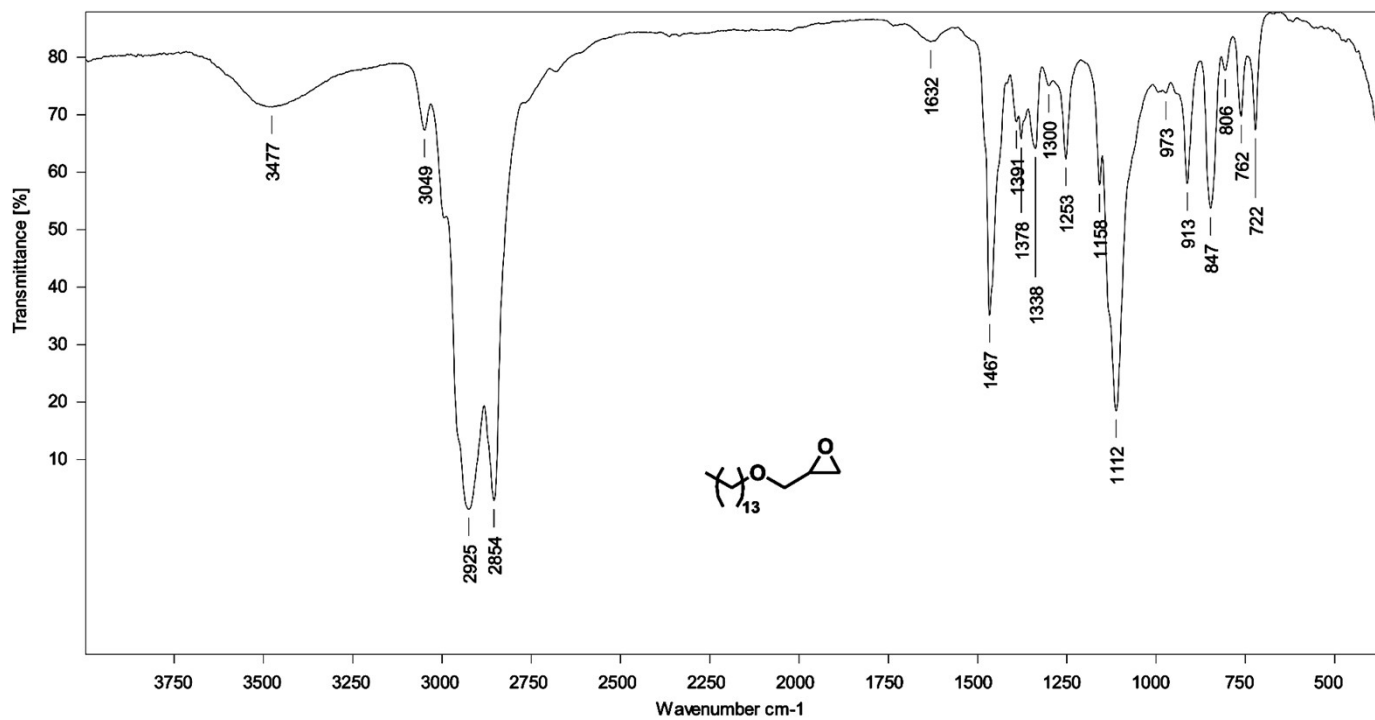

Figure S44. IR spectrum (film) of compound 1h.

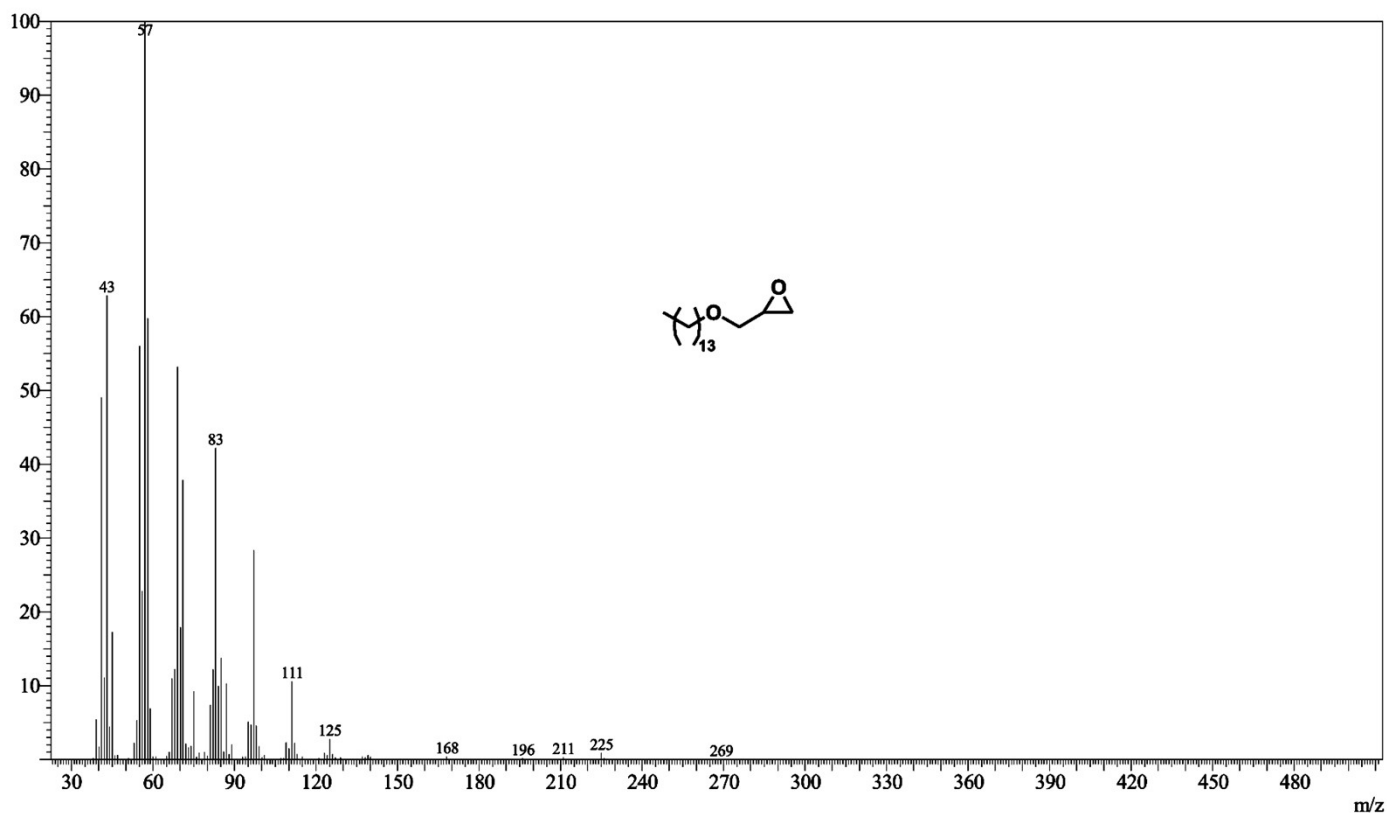

Figure S45. EI-MS spectrum of compound 1h.

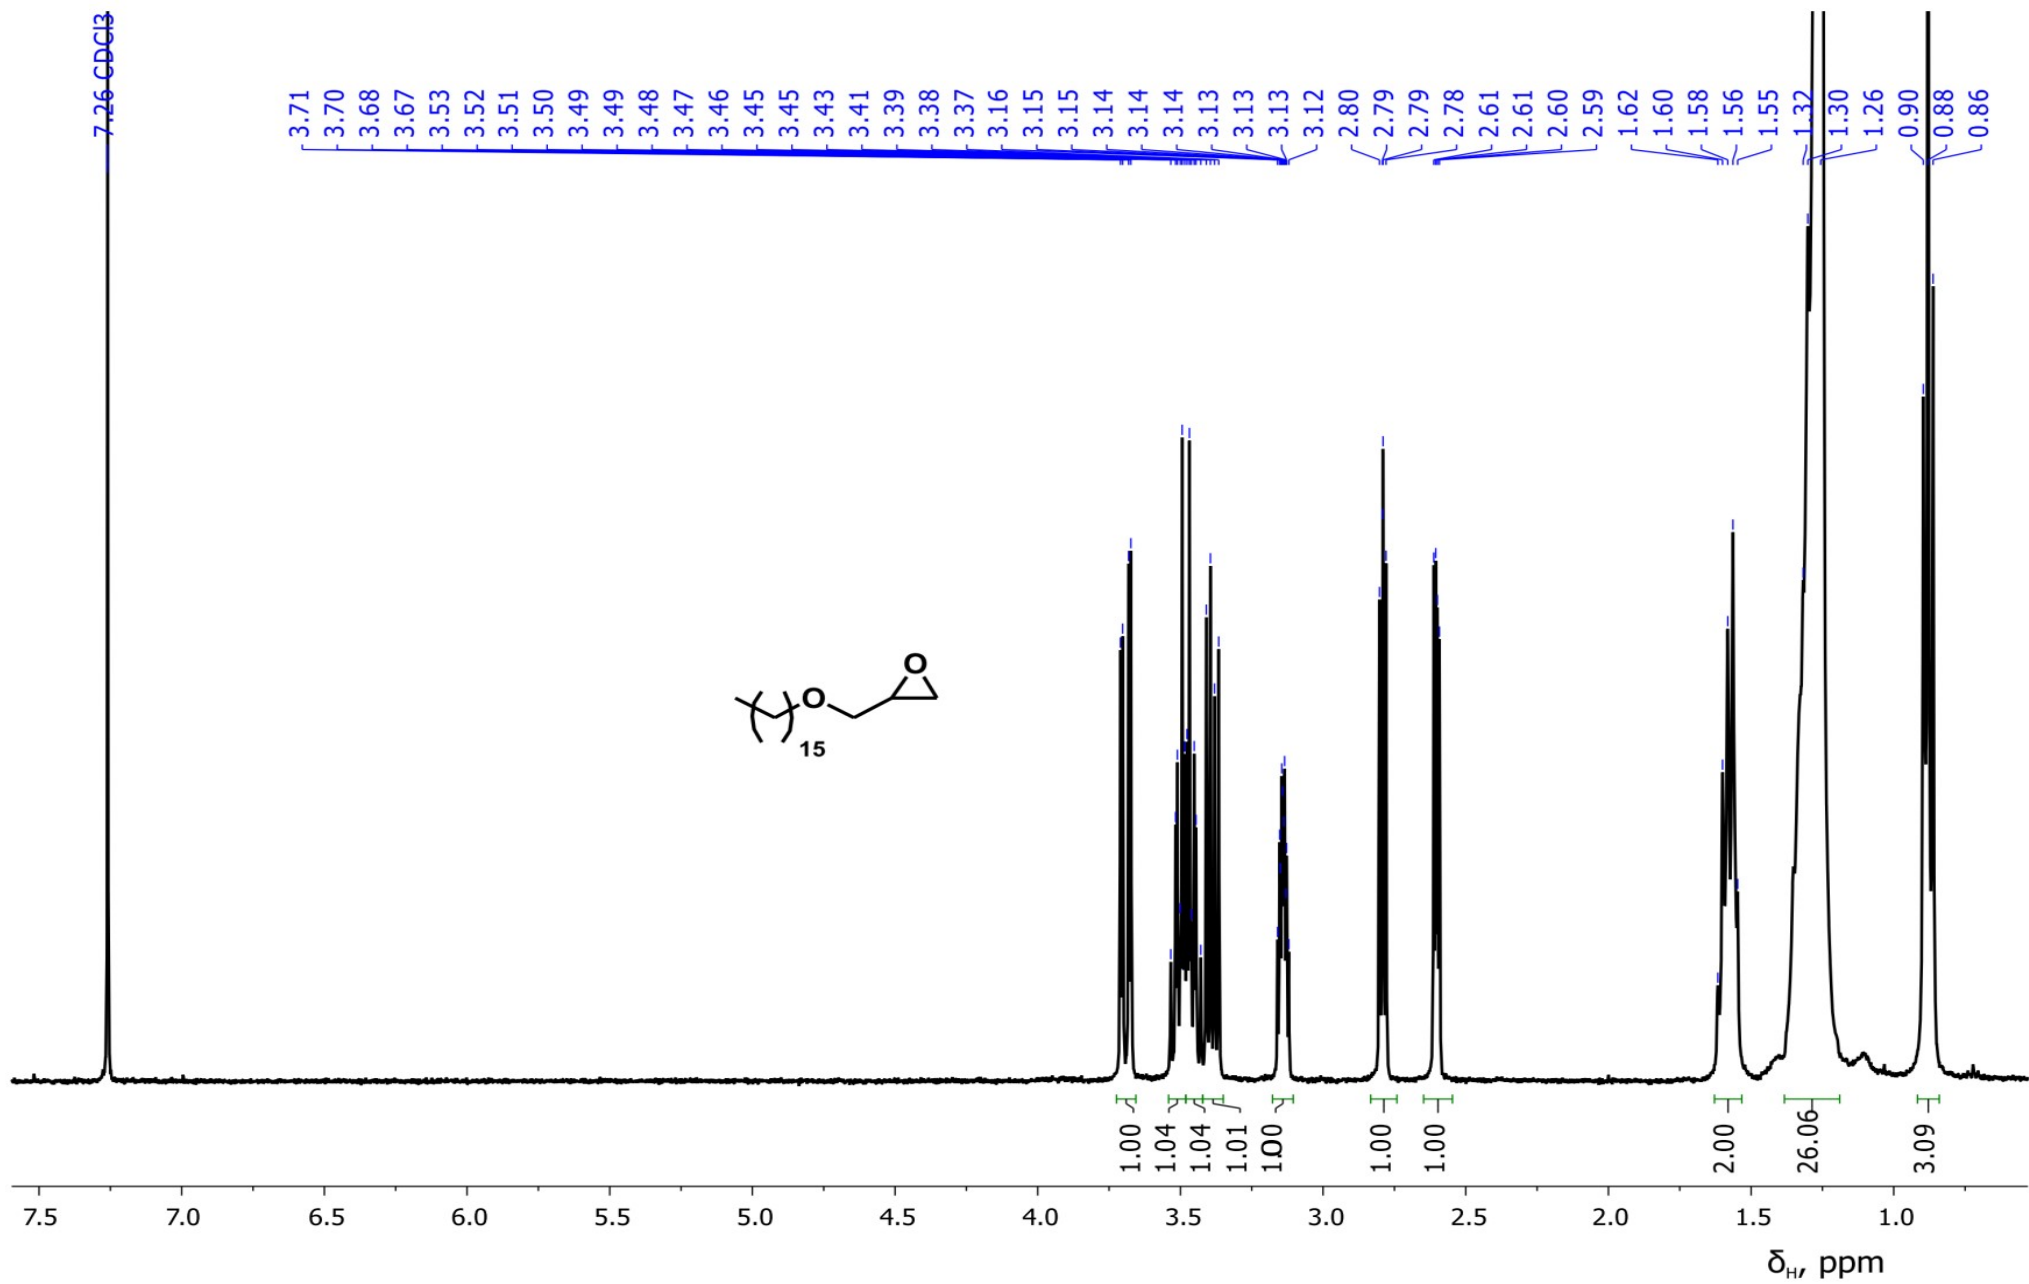

Figure S46. <sup>1</sup>H NMR spectrum (400 MHz, CDCl<sub>3</sub>) of compound **1i**.

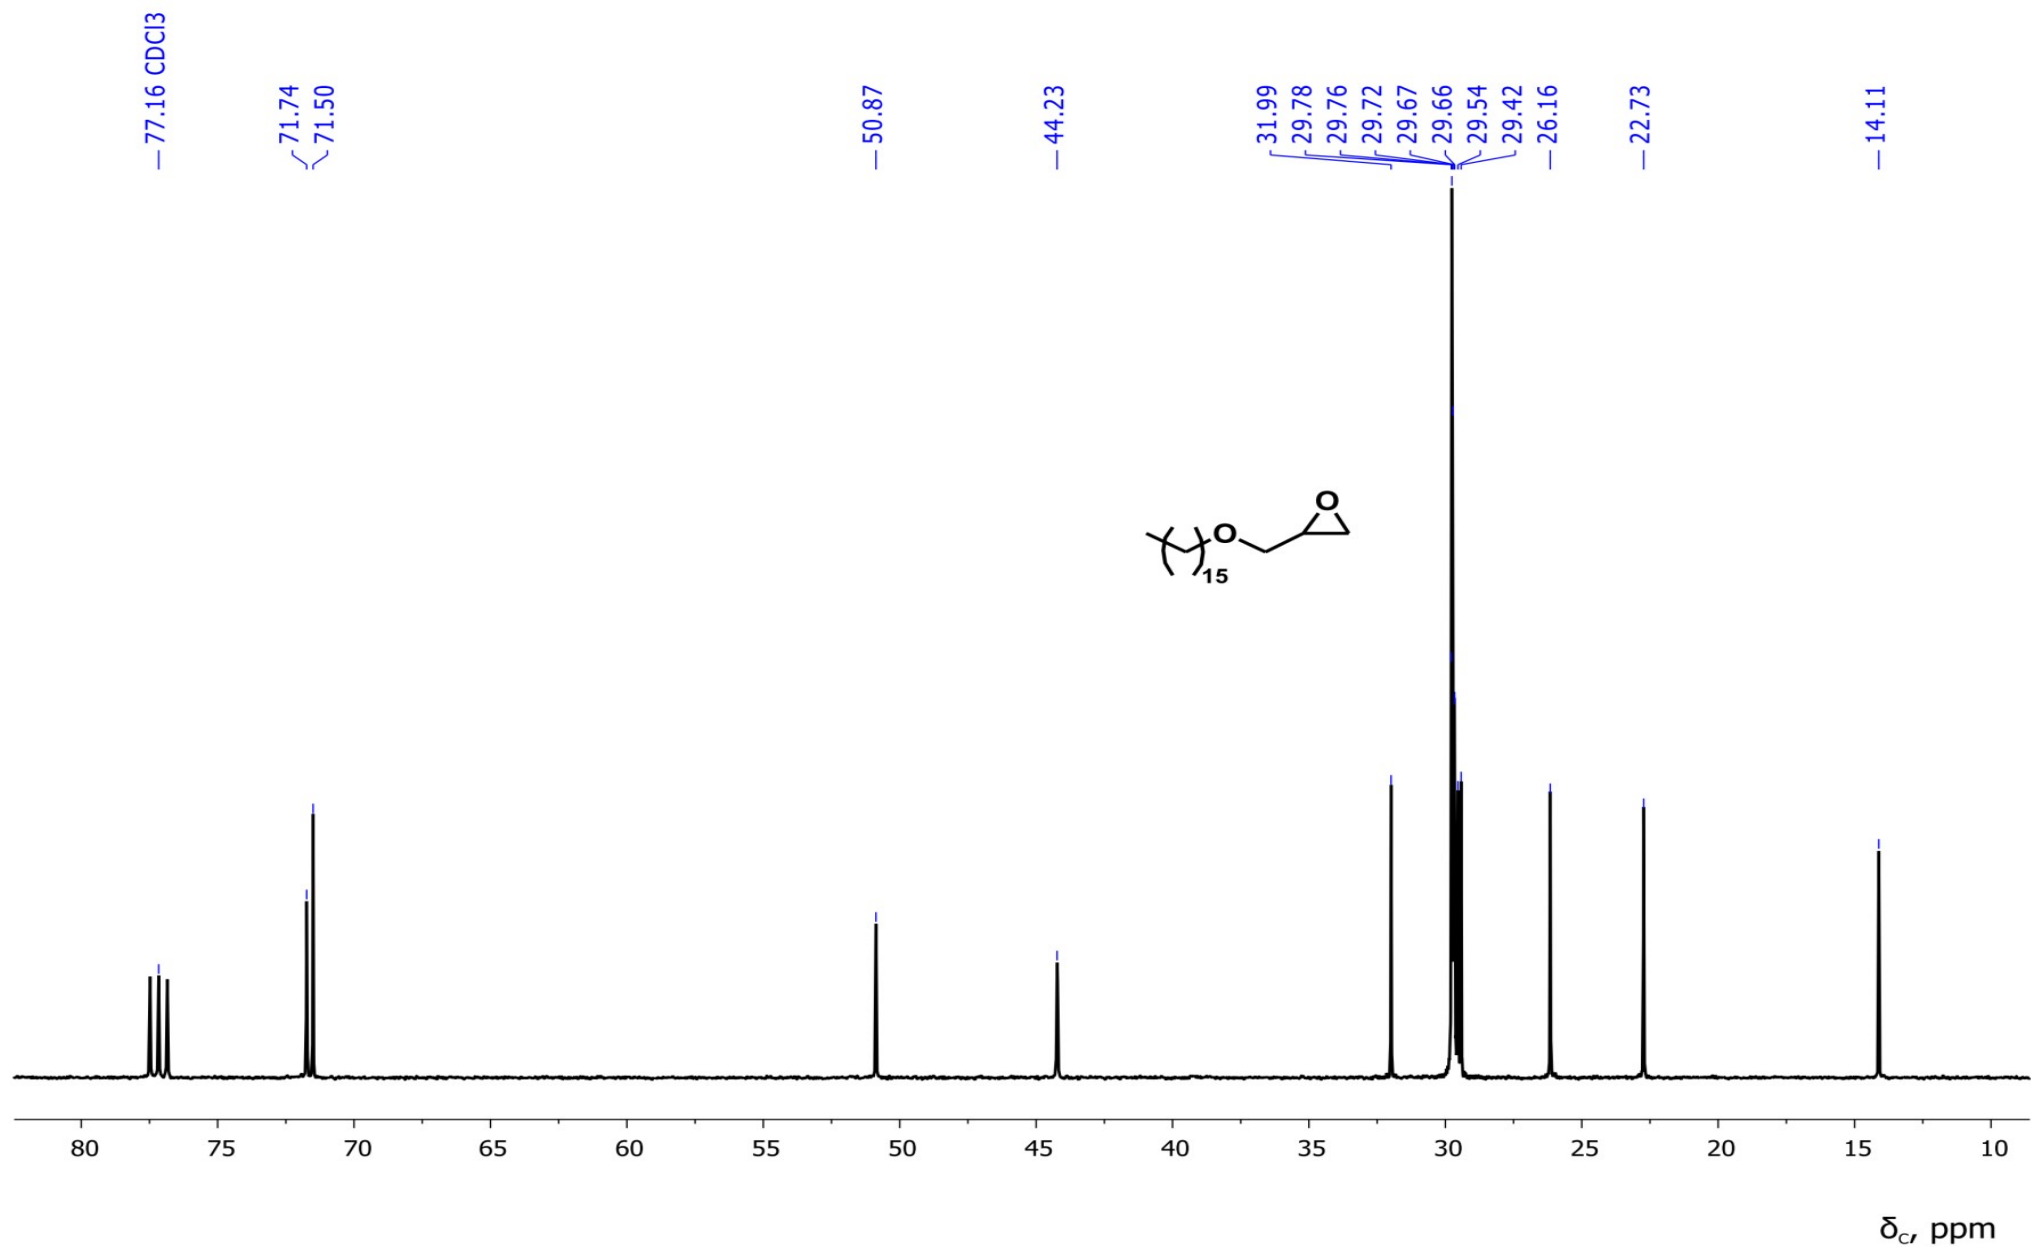

**Figure S47.**  $^{13}\text{C}$ - $\{^1\text{H}\}$  NMR spectrum (100.6 MHz,  $\text{CDCl}_3$ ) of compound **1i**.

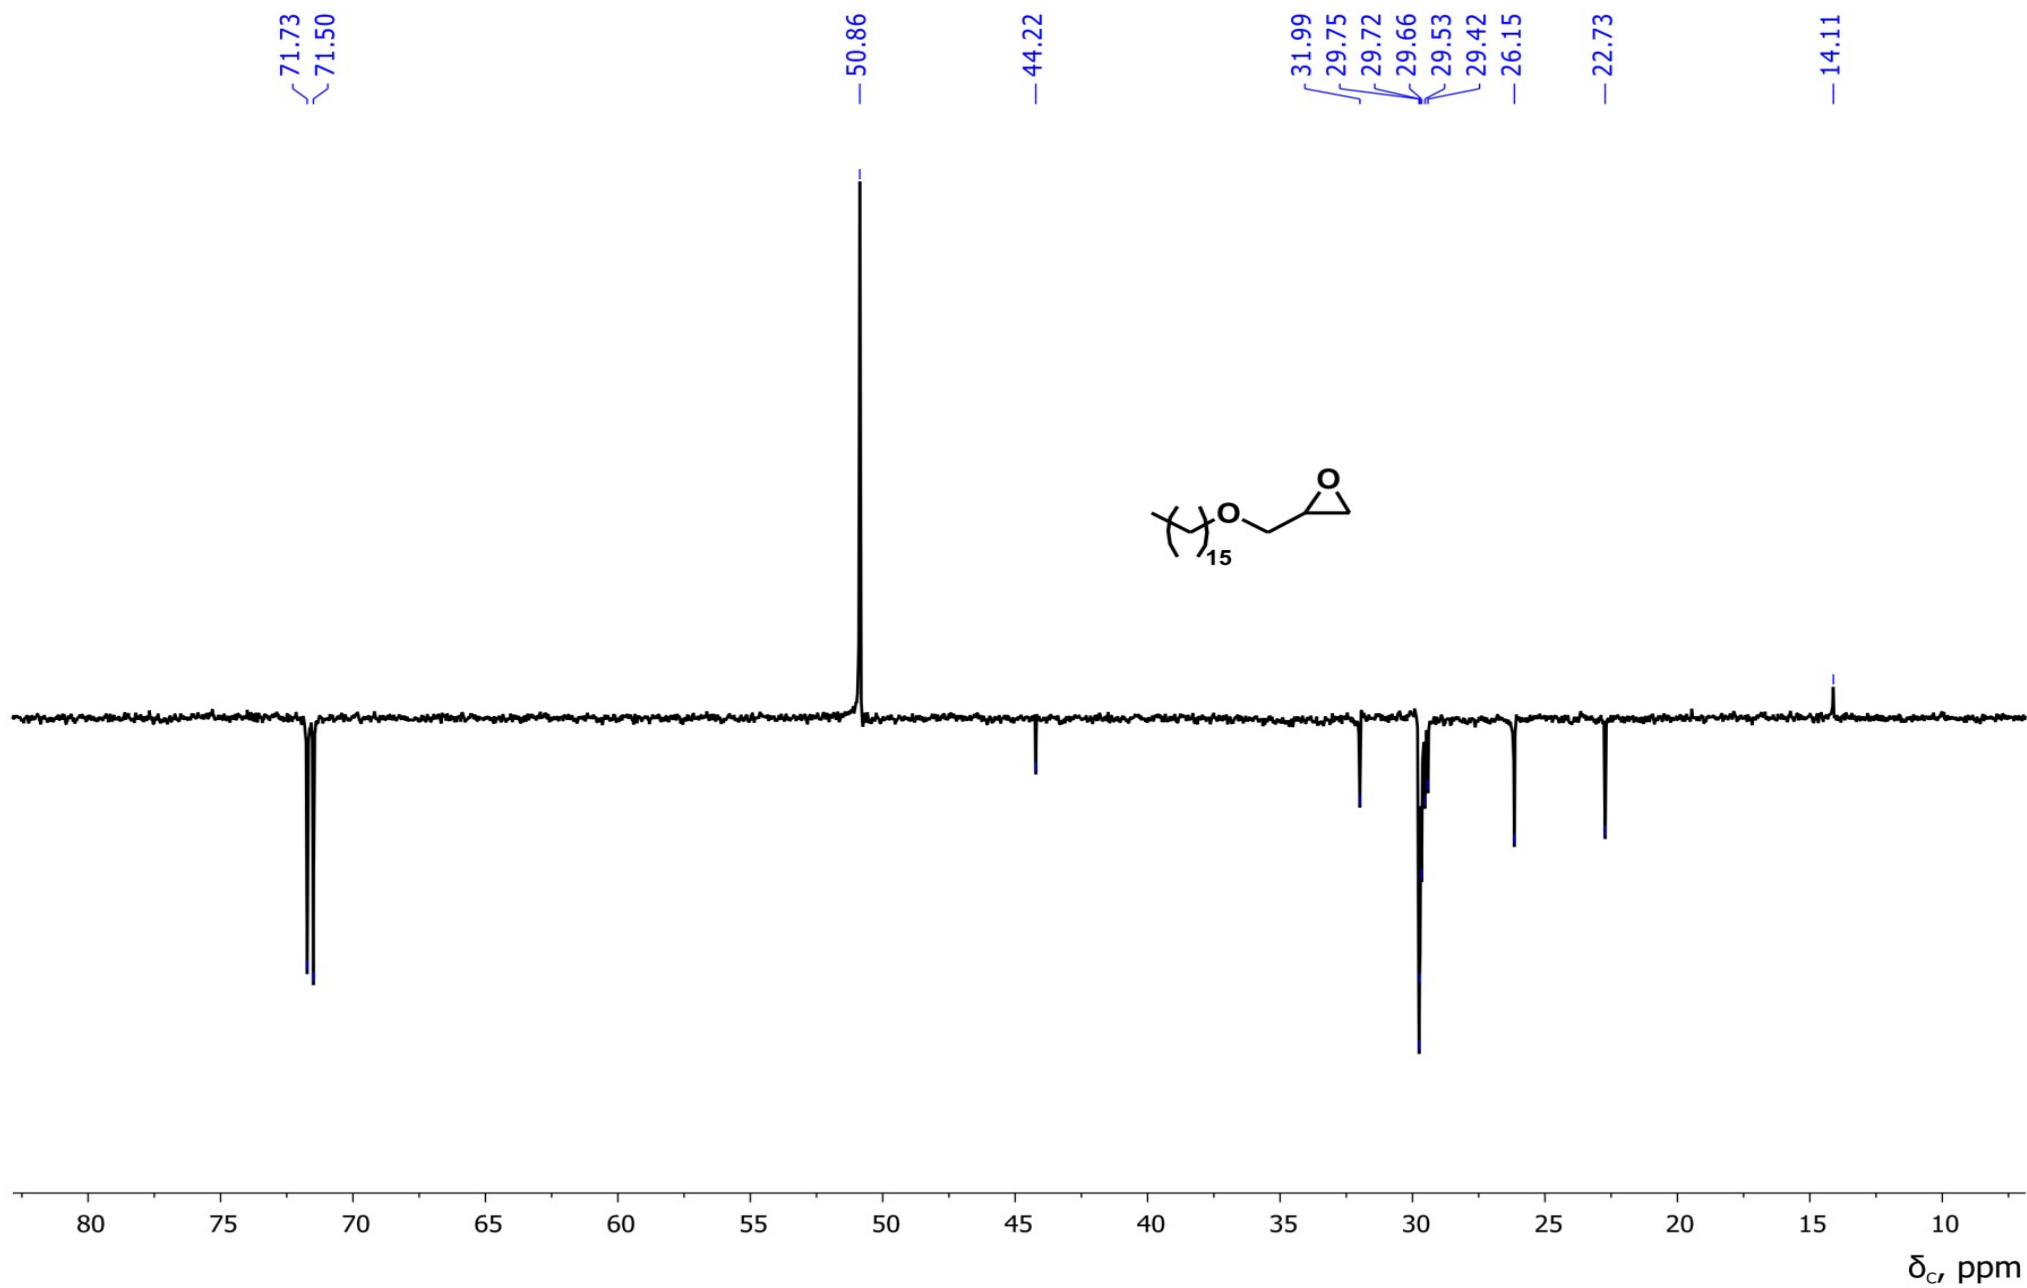

Figure S48.  $^{13}\text{C}$ - $\{^1\text{H}\}$  APT NMR spectrum (100.6 MHz,  $\text{CDCl}_3$ ) of compound **1i**.

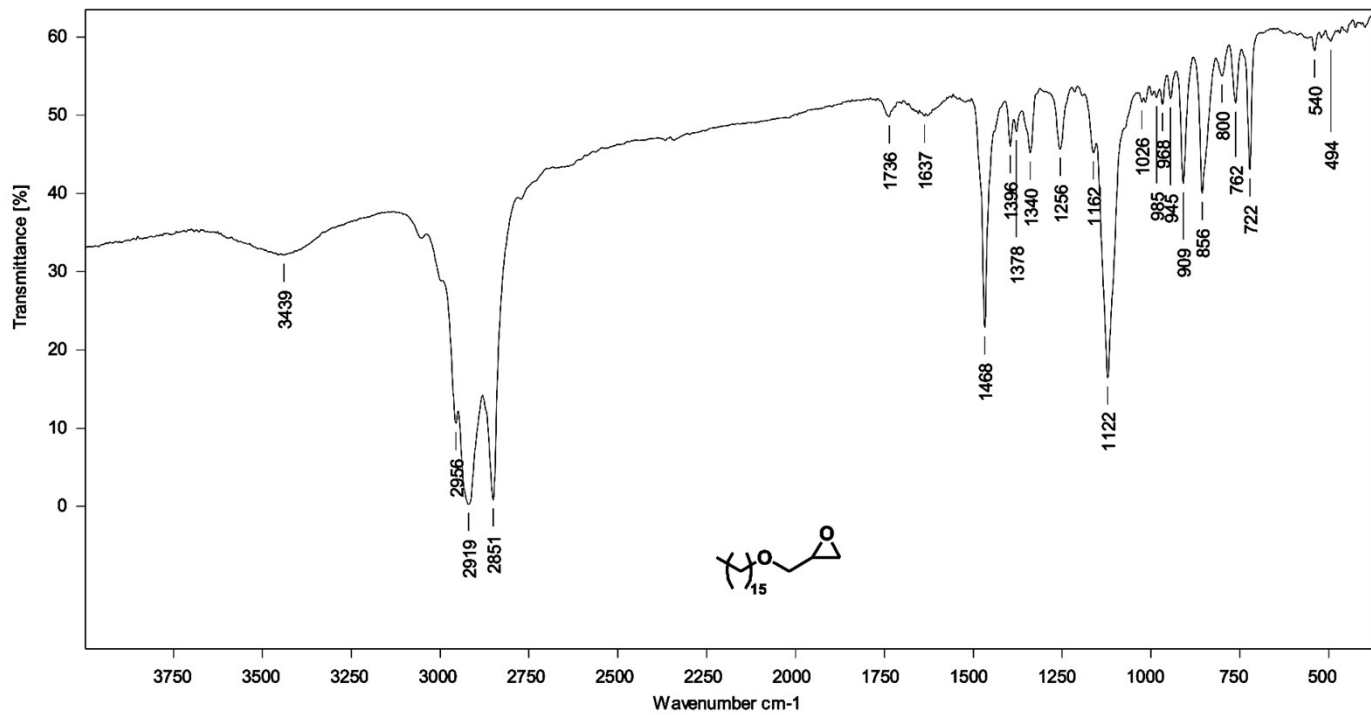

Figure S49. IR spectrum (KBr) of compound **1i**.

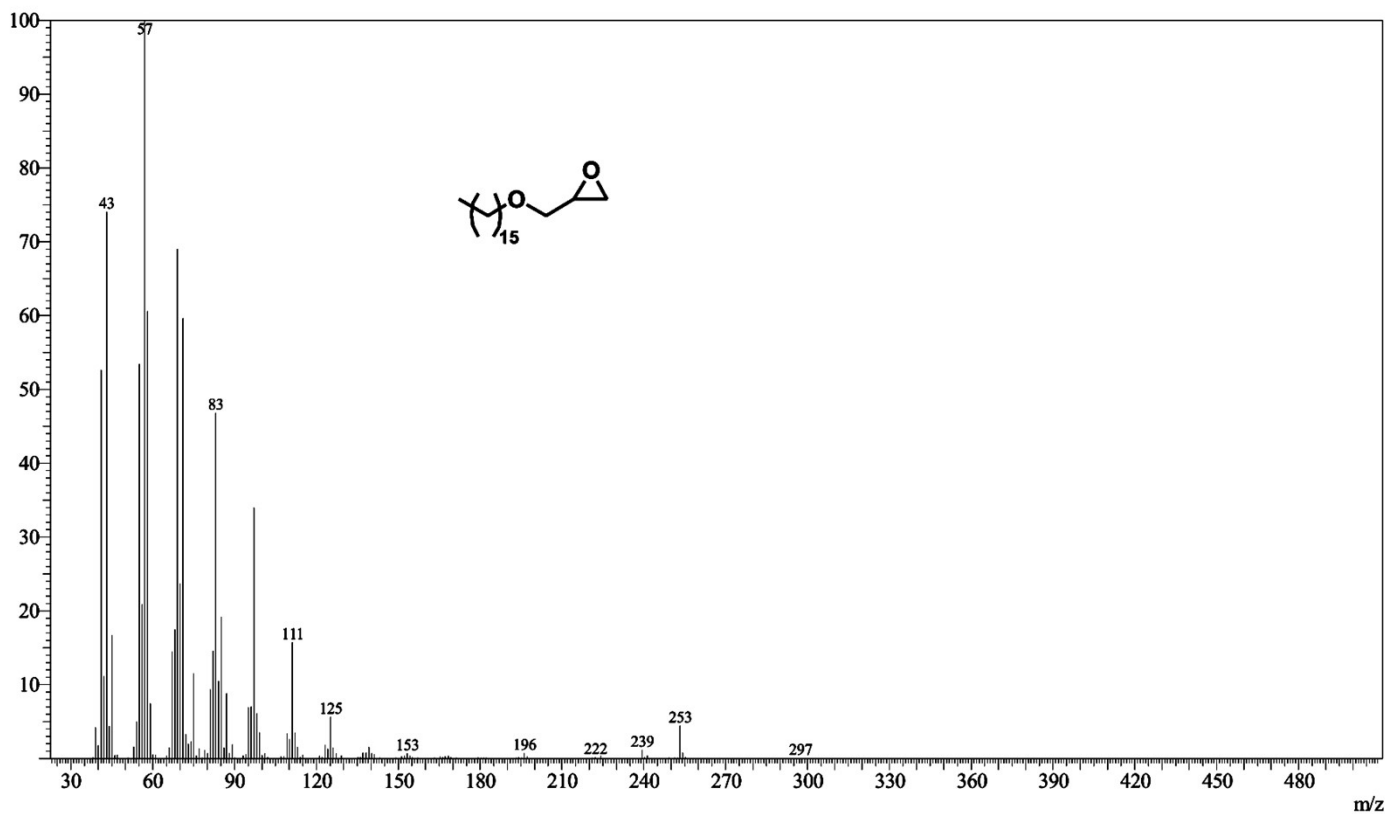

Figure S50. EI-MS spectrum of compound **1i**.

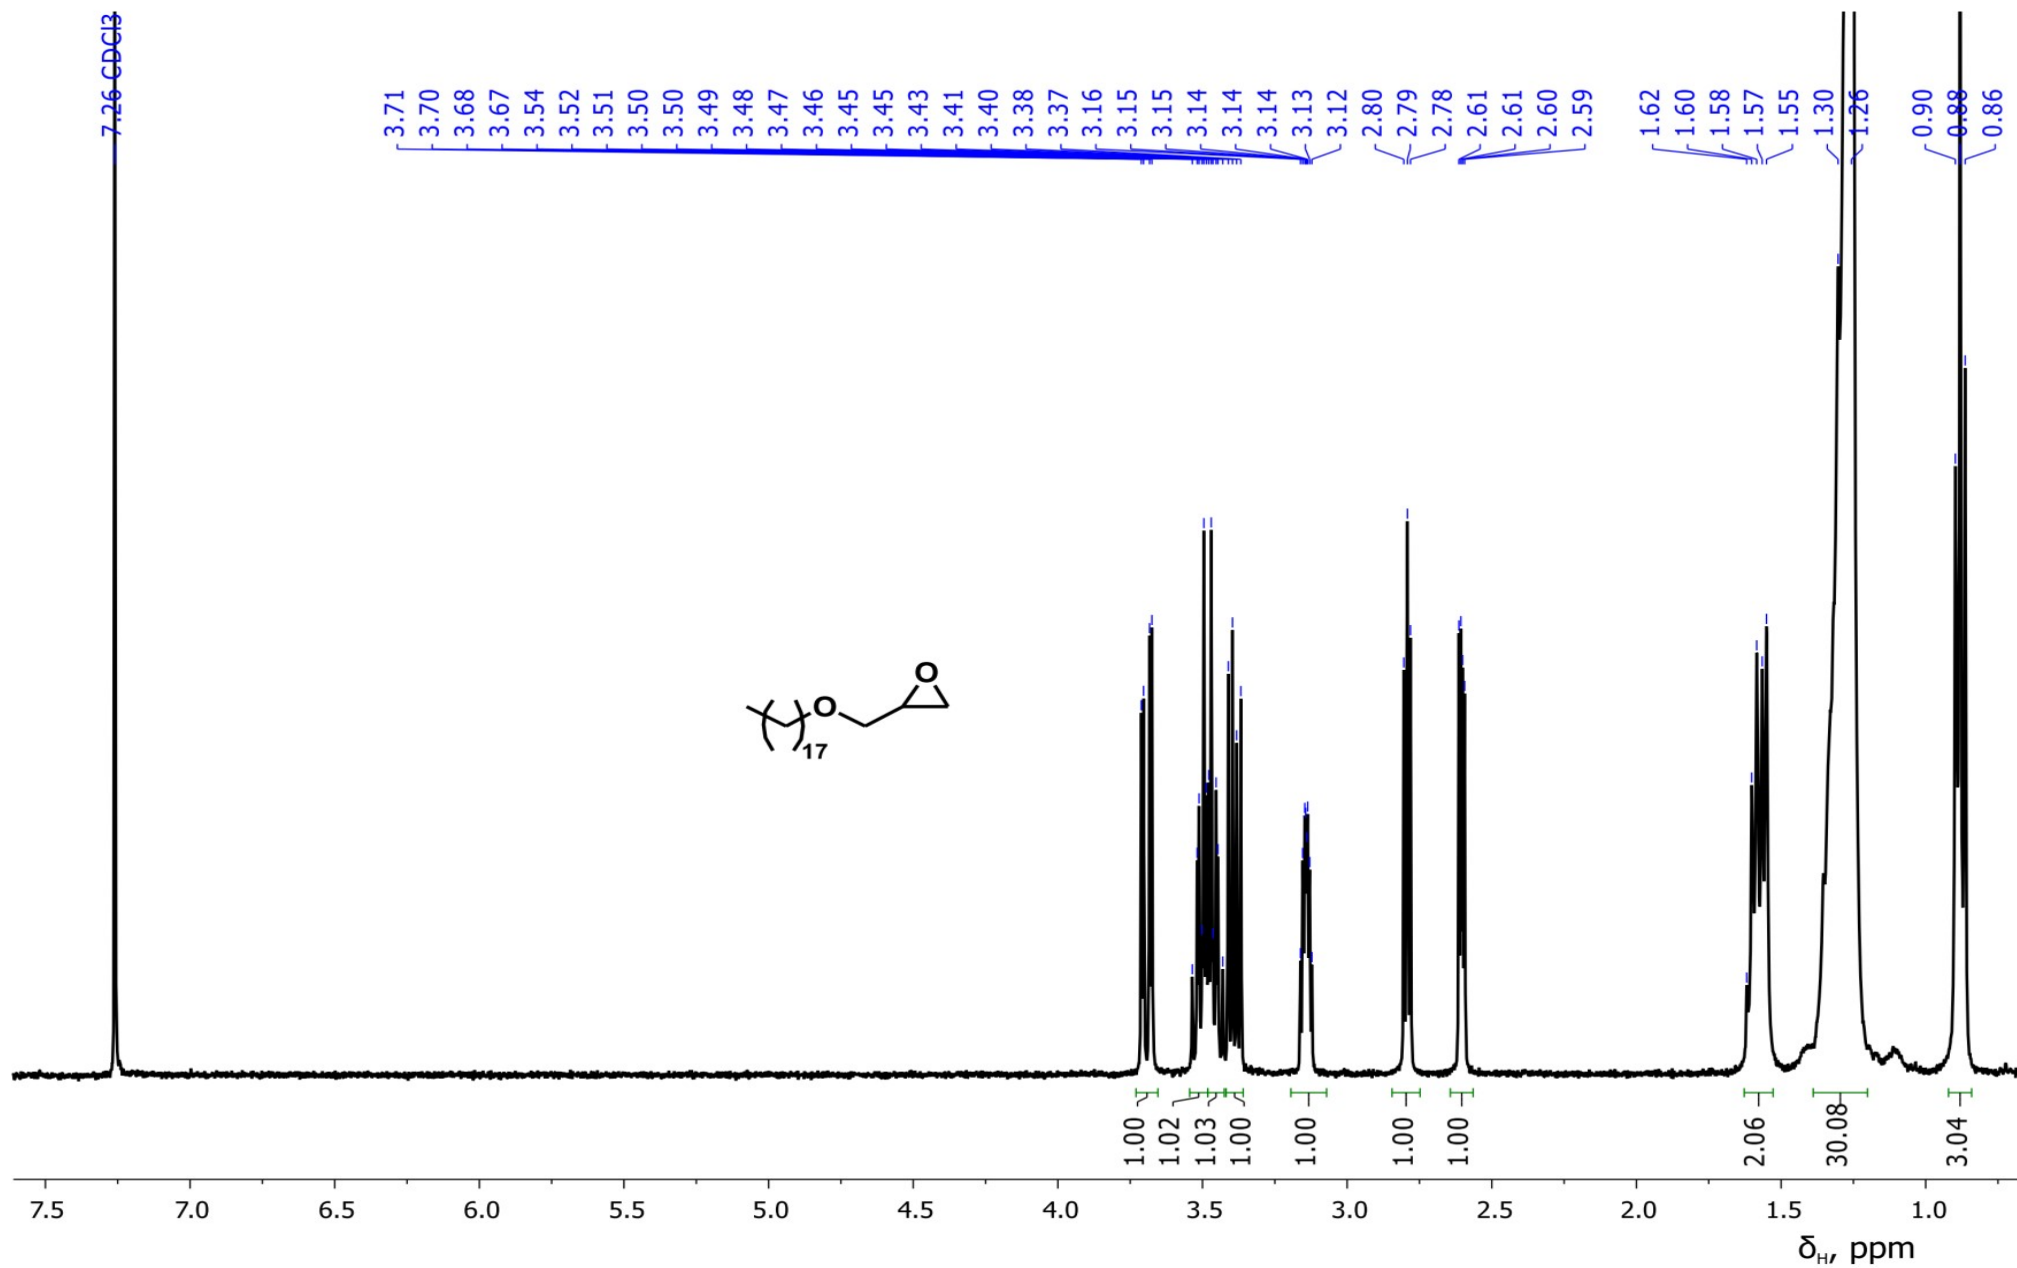

Figure S51. <sup>1</sup>H NMR spectrum (400 MHz, CDCl<sub>3</sub>) of compound **1j**.

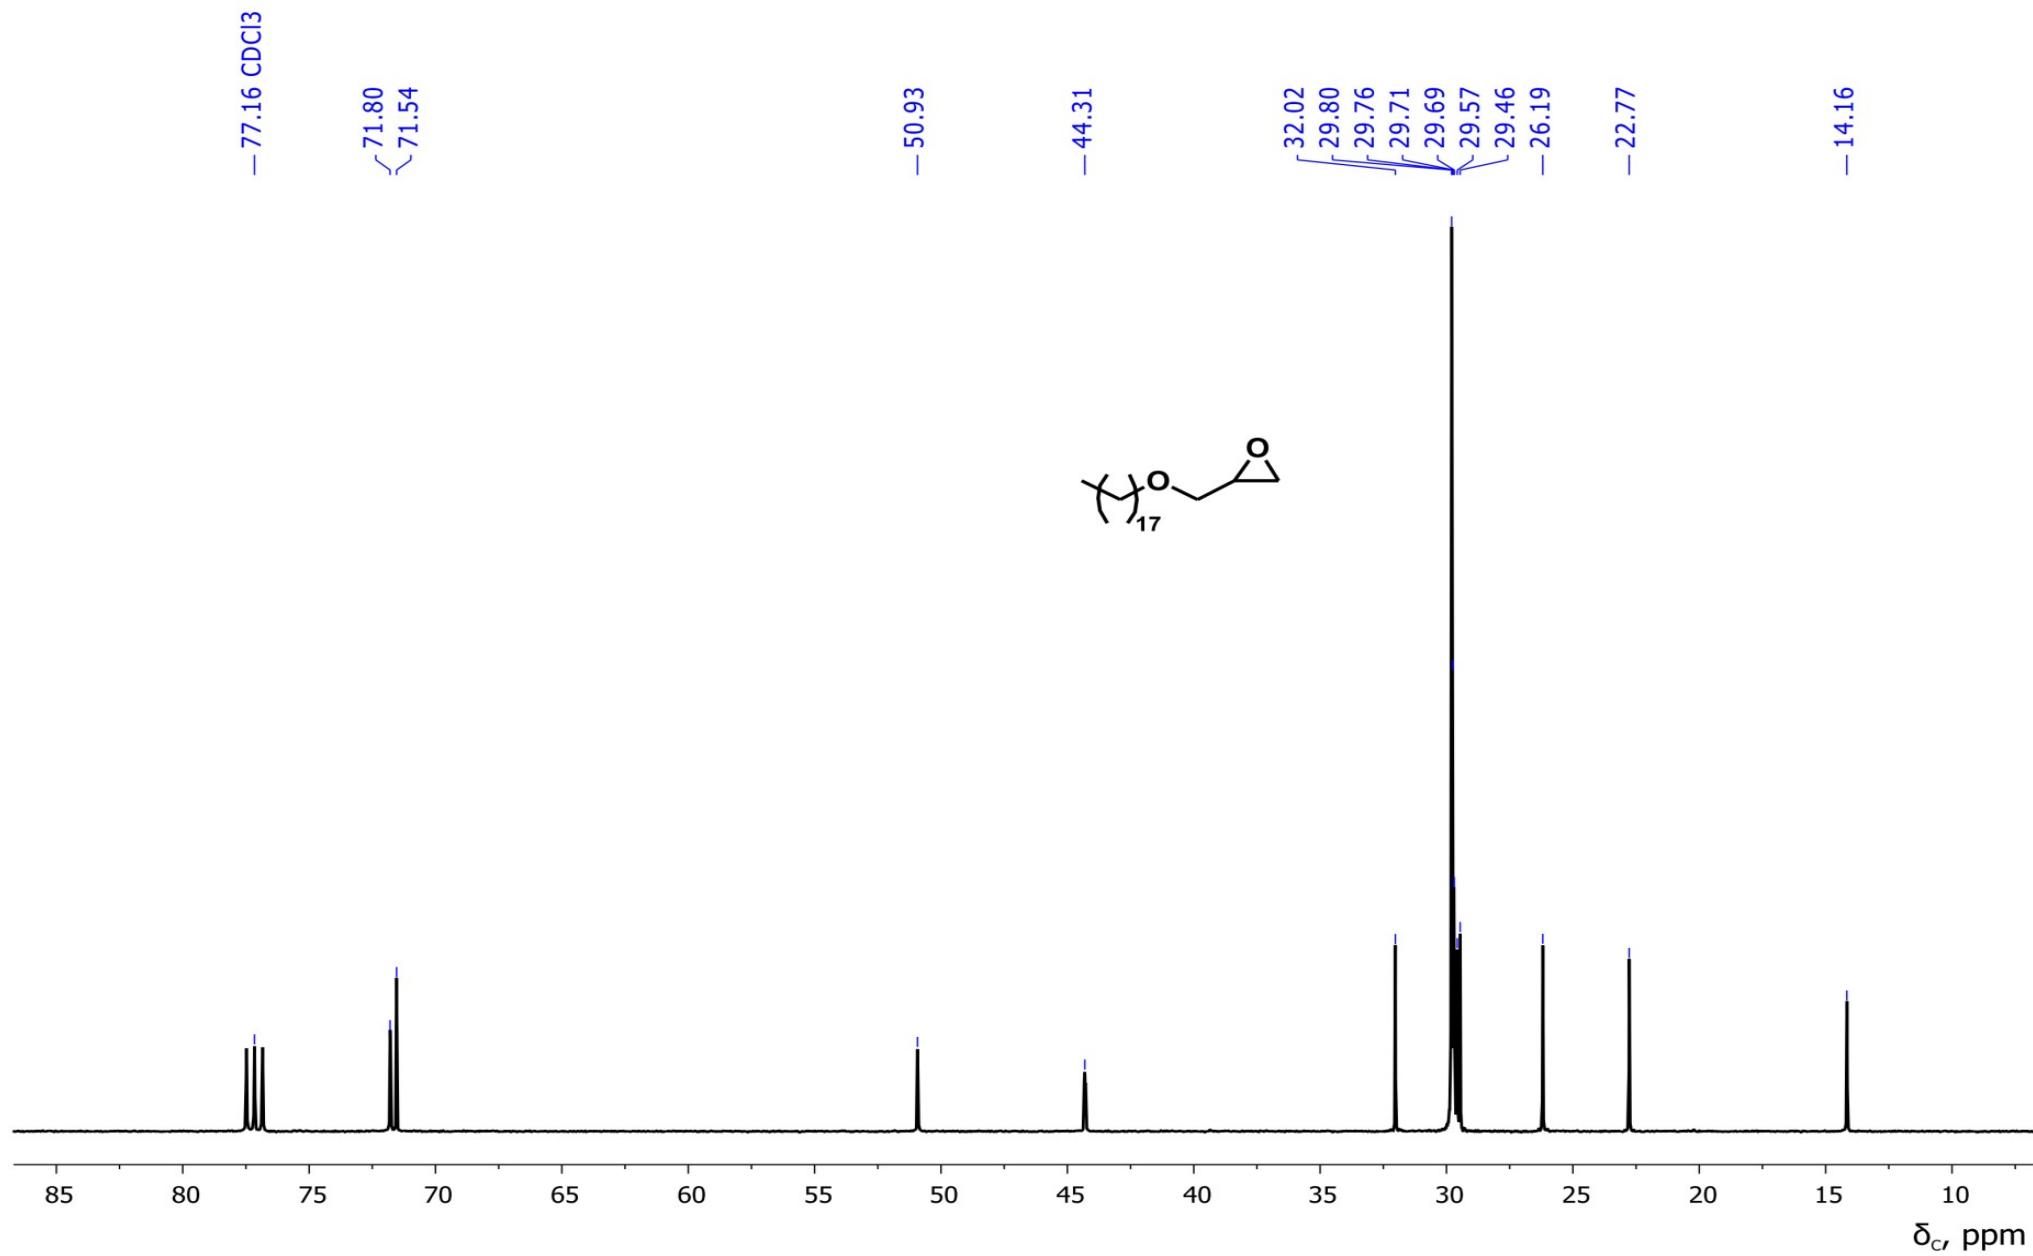

**Figure S52.** <sup>13</sup>C-<sup>1</sup>H NMR spectrum (100.6 MHz, CDCl<sub>3</sub>) of compound **1j**.

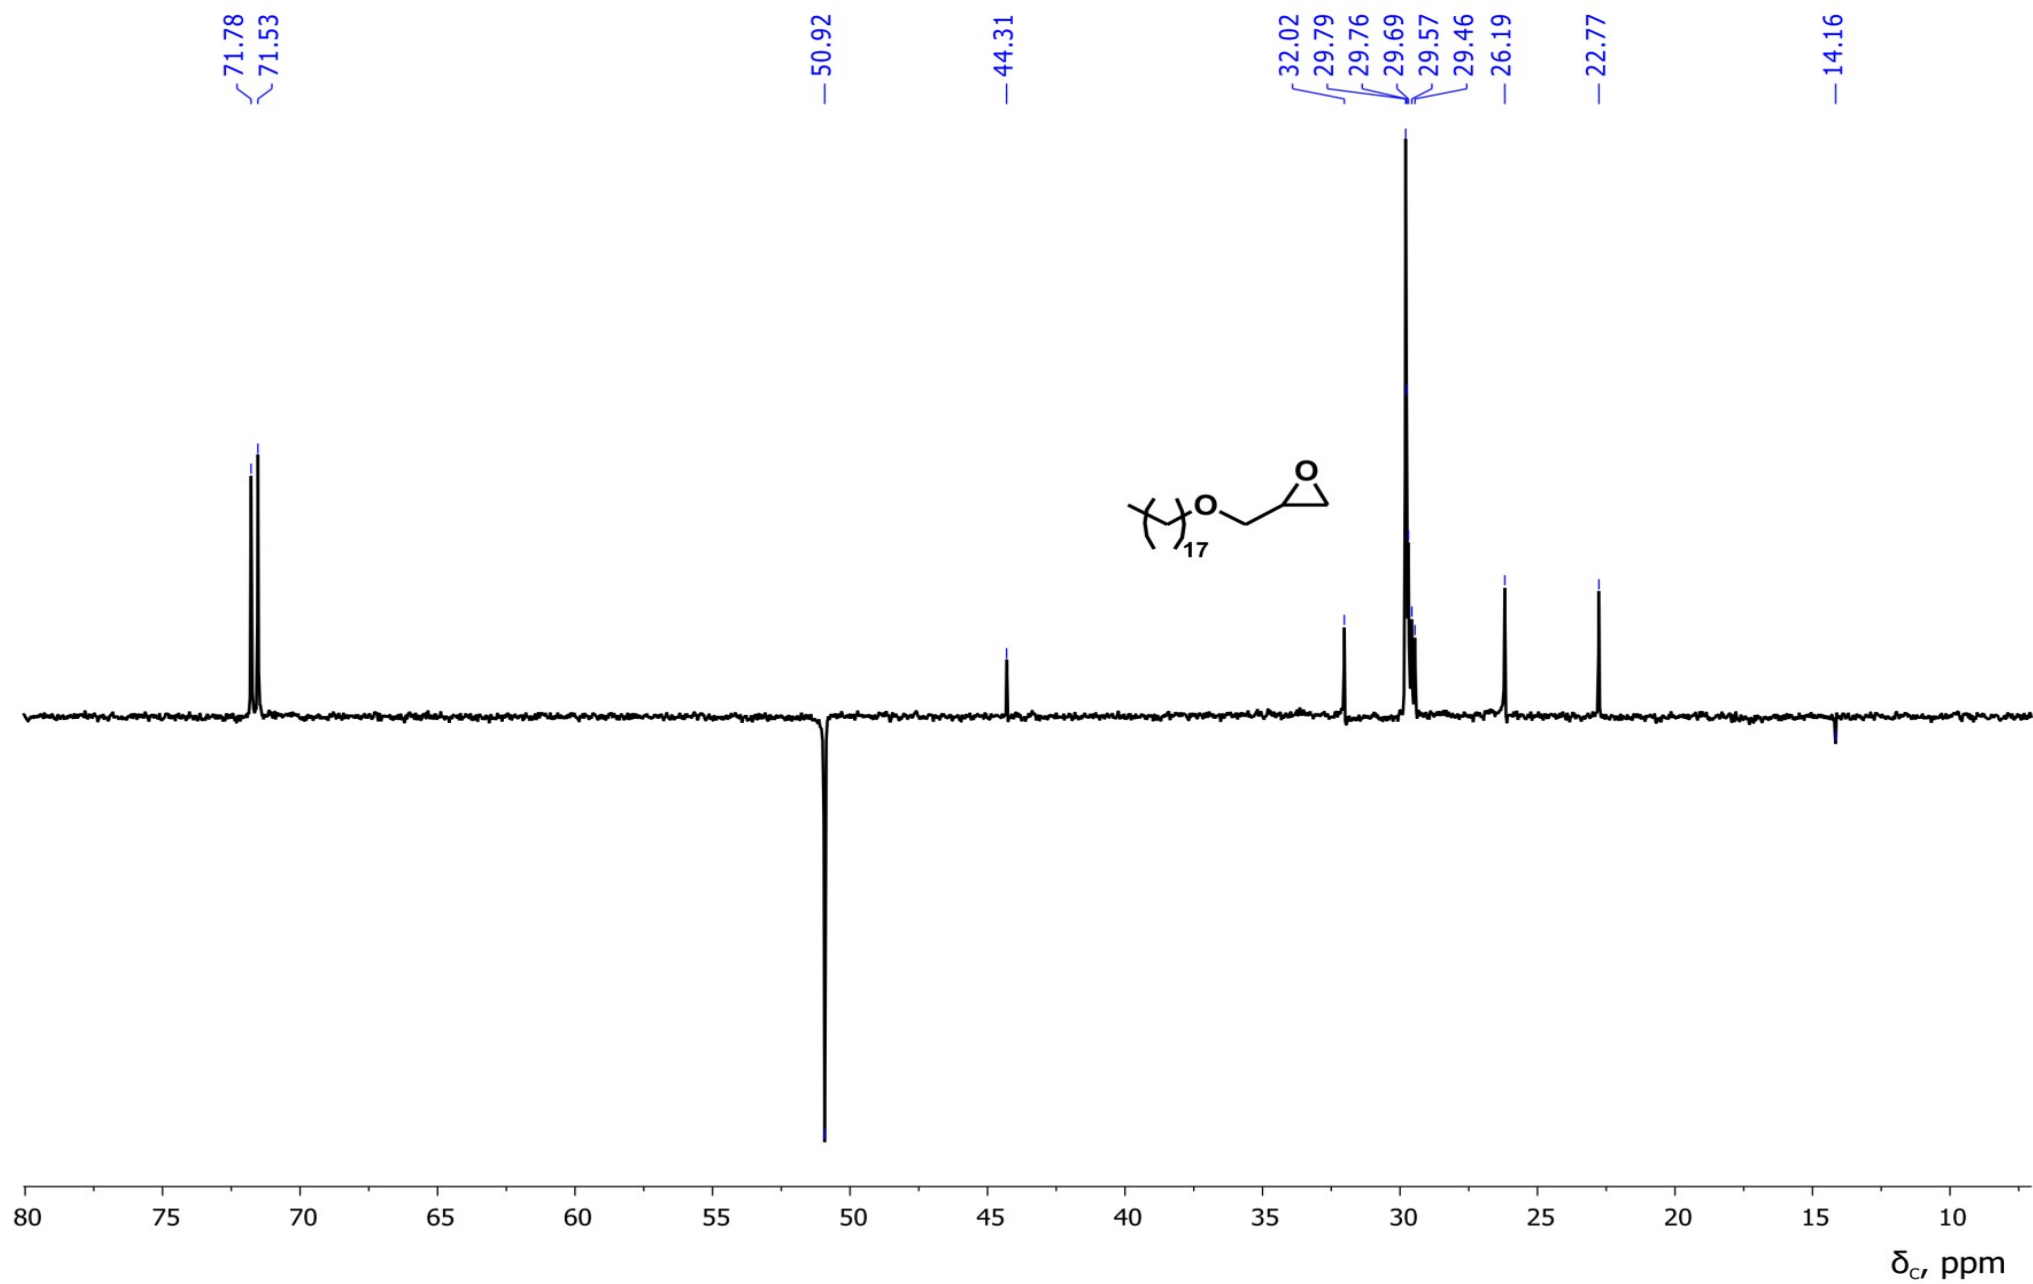

**Figure S53.**  $^{13}\text{C}$ - $\{^1\text{H}\}$  APT NMR spectrum (100.6 MHz,  $\text{CDCl}_3$ ) of compound **1j**.

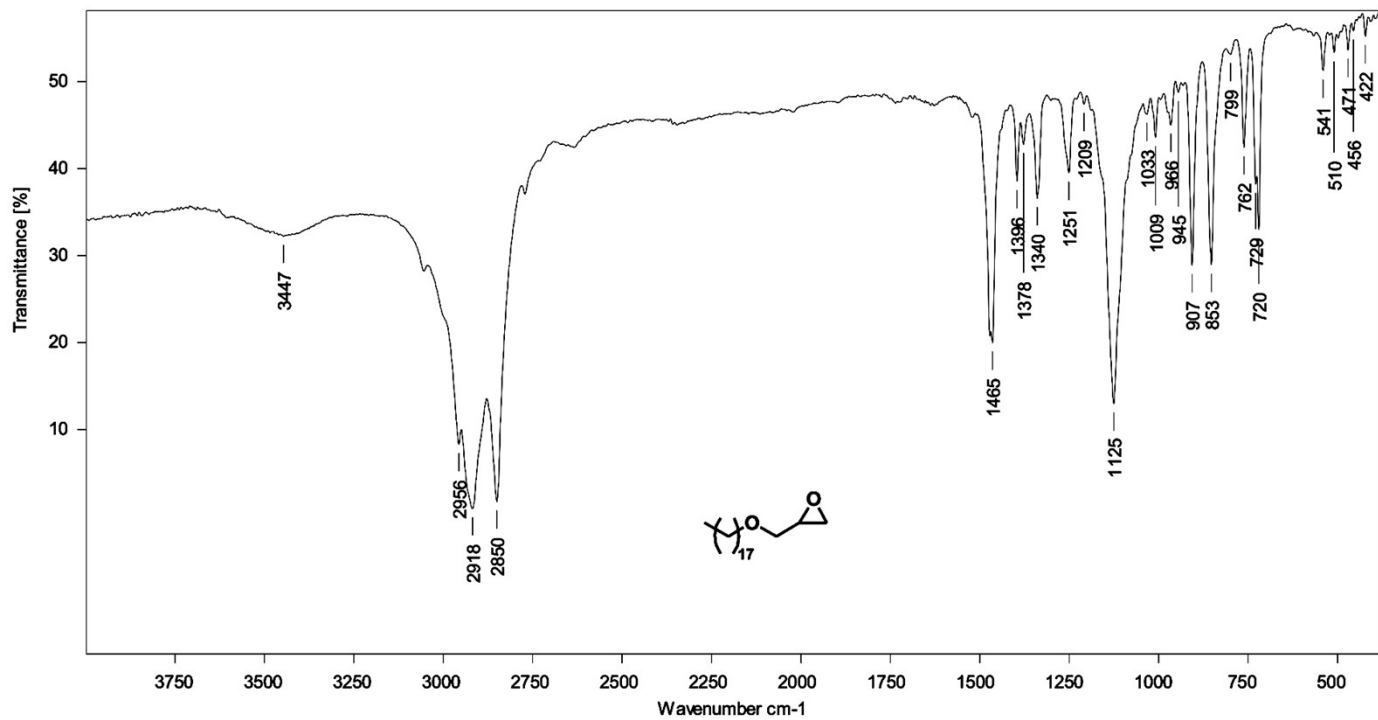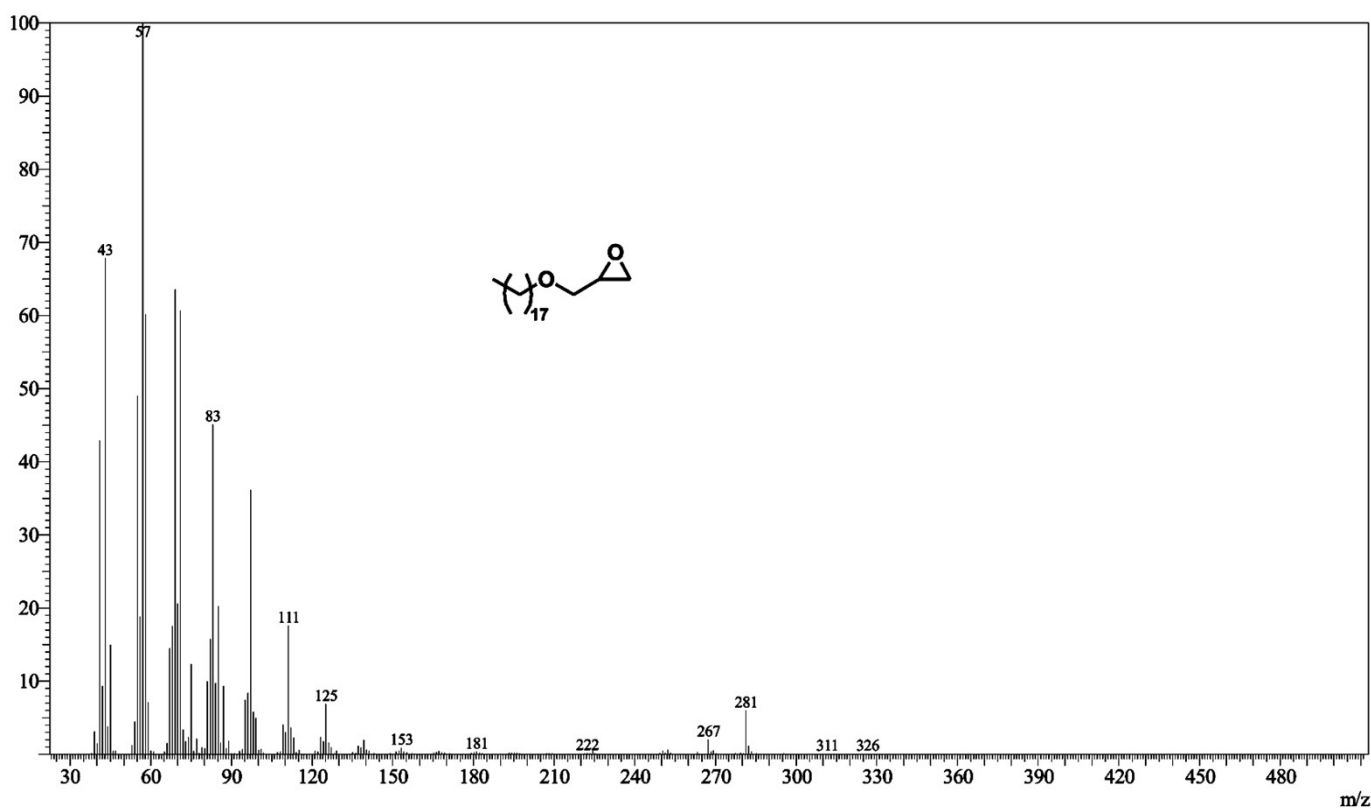

### Spectral data of compounds 3.

(3-Butoxy-2-hydroxypropyl)triphenylphosphonium trifluoromethanesulfonate (**3c**). Colorless solid, mp 91-93 °C, yield was 150 mg (81 %); TLC  $R_f$  = 0.62 (benzene/acetonitrile = 3/2); IR (KBr): 3413, 3065, 2959, 2930, 2872, 1818, 1773, 1710, 1620, 1589, 1486, 1465, 1440, 1384, 1280, 1258, 1225, 1160, 1112, 1030, 998, 897, 825, 783, 748, 723, 691, 638, 573, 539, 513, 443  $\text{cm}^{-1}$ ;  $^1\text{H}$  NMR (400 MHz,  $\text{CDCl}_3$ ):  $\delta$  = 7.79 (m,  $^3J_{\text{HH}} = 6.9$  Hz,  $^5J_{\text{PH}} = 1.8$  Hz,  $^4J_{\text{HH}} = 1.2$  Hz, 3H,  $\text{H}^{\text{Ar}}_p$ ), 7.73 (m,  $^3J_{\text{PH}} = 12.6$  Hz,  $^3J_{\text{HH}} = 7.3$ – $7.4$  Hz, 6H,  $\text{H}^{\text{Ar}}_o$ ), 7.67 (m,  $^3J_{\text{HH}} = 7.3$  Hz,  $^4J_{\text{PH}} = 4.0$  Hz, 6H,  $\text{H}^{\text{Ar}}_m$ ), 4.13 (s, 1H,  $\text{H}^2$ ), 3.64 (m, 3H,  $\text{H}^1_B$  overlapped with  $\text{H}^3$ ), 3.47 (m, 3H,  $\text{H}^1_A$  overlapped with  $\text{H}^1$ ), 2.78 (br. s, 1H, OH), 1.52 (m,  $^3J_{\text{HH}} = 7.5$ , 2H,  $\text{H}^2$ '), 1.32 (m,  $^3J_{\text{HH}} = 7.5$ , 2H,  $\text{H}^3$ '), 0.90 (t,  $^3J_{\text{HH}} = 7.4$  Hz, 3H,  $\text{H}^4$ );  $^{13}\text{C}$ - $\{^1\text{H}\}$  NMR (100.6 MHz,  $\text{CDCl}_3$ ):  $\delta_c$  = 135.03 (d,  $^4J_{\text{PC}} = 2.5$  Hz,  $\text{C}^{\text{Ar}}_p$ ), 133.97 (d,  $^2J_{\text{PC}} = 10.1$  Hz,  $\text{C}^{\text{Ar}}_o$ ), 130.37 (d,  $^3J_{\text{PC}} = 12.7$  Hz,  $\text{C}^{\text{Ar}}_m$ ), 120.40 (q,  $^1J_{\text{FC}} = 320.0$  Hz,  $\text{CF}_3$ ), 118.95 (d,  $^1J_{\text{PC}} = 87.1$  Hz,  $\text{C}^{\text{Ar}}_i$ ), 73.96 (d,  $^3J_{\text{PC}} = 15.1$  Hz,  $\text{C}^3$ ), 71.54 (s,  $\text{C}^1$ ), 65.56 (d,  $^2J_{\text{PC}} = 5.6$  Hz,  $\text{C}^2$ ), 31.73 (s,  $\text{C}^2$ '), 28.50 (d,  $^1J_{\text{PC}} = 54.4$  Hz,  $\text{C}^1$ '), 19.36 (s,  $\text{C}^3$ '), 14.01 (s,  $\text{C}^4$ );  $^{31}\text{P}$ - $\{^1\text{H}\}$  NMR (162 MHz,  $\text{CDCl}_3$ ):  $\delta_p$  = 24.3 (s); MALDI-MS,  $m/z$  393.0  $[\text{M} - \text{CF}_3\text{SO}_3]^+$ . Calculated for  $\text{C}_{26}\text{H}_{32}\text{O}_2\text{P}^+$ : 393.2; Calculated for  $\text{C}_{26}\text{H}_{30}\text{F}_3\text{O}_5\text{PS}$ : C, 57.56; H, 5.57; Found: C, 57.28; H, 5.81.

(3-(Hexyloxy)-2-hydroxypropyl)triphenylphosphonium trifluoromethanesulfonate (**3d**). Colorless solid, mp 84-85 °C, yield was 143 mg (73 %); TLC  $R_f$  = 0.62 (benzene/acetonitrile = 3/2); IR (KBr): 3406, 3064, 3031, 2930, 2860, 2694, 2588, 2306, 2214, 1979, 1913, 1825, 1782, 1723, 1589, 1538, 1486, 1466, 1440, 1395, 1379, 1338, 1255, 1225, 1159, 1112, 1031, 998, 929, 882, 824, 783, 748, 722, 691, 638, 573, 536, 514, 445, 409  $\text{cm}^{-1}$ ;  $^1\text{H}$  NMR (600 MHz,  $\text{CDCl}_3$ ):  $\delta$  = 7.78 (m,  $^3J_{\text{HH}} = 7.3$  Hz, 3H,  $\text{H}^{\text{Ar}}_p$ ), 7.72 (m,  $^3J_{\text{PH}} = 12.8$  Hz,  $^3J_{\text{HH}} = 7.8$  Hz, 6H,  $\text{H}^{\text{Ar}}_o$ ), 7.66 (m,  $^3J_{\text{HH}} = 7.8$  Hz,  $^4J_{\text{PH}} = 3.5$  Hz, 6H,  $\text{H}^{\text{Ar}}_m$ ), 4.11 (br. m, 1H,  $\text{H}^2$ ), 3.64 (m, 3H,  $\text{H}^1_B$  overlapped with  $\text{H}^3$ ), 3.45 (m, 3H,  $\text{H}^1_A$  overlapped with  $\text{H}^1$ ), 2.81 (br. s, 1H, OH), 1.52 (m,  $^3J_{\text{HH}} = 7.0$  Hz, 2H,  $\text{H}^2$ '), 1.18-1.36 (m, 6H,  $\text{H}^{3'-5'}$ ), 0.86 (t,  $^3J_{\text{HH}} = 6.8$  Hz, 3H,  $\text{H}^6$ );  $^{13}\text{C}$ - $\{^1\text{H}\}$  NMR (100.6 MHz,  $\text{CDCl}_3$ ):  $\delta_c$  = 134.81 (d,  $^4J_{\text{PC}} = 2.5$  Hz,  $\text{C}^{\text{Ar}}_p$ ), 133.59 (d,  $^2J_{\text{PC}} = 10.2$  Hz,  $\text{C}^{\text{Ar}}_o$ ), 130.11 (d,  $^3J_{\text{PC}} = 12.8$  Hz,  $\text{C}^{\text{Ar}}_m$ ), 120.40 (q,  $^1J_{\text{FC}} = 320.0$  Hz,  $\text{CF}_3$ ), 118.53 (d,  $^1J_{\text{PC}} = 87.1$  Hz,  $\text{C}^{\text{Ar}}_i$ ), 73.74 (d,  $^3J_{\text{PC}} = 14.6$  Hz,  $\text{C}^3$ ), 71.49 (s,  $\text{C}^1$ '), 65.13 (d,  $^2J_{\text{PC}} = 5.5$  Hz,  $\text{C}^2$ '), 31.44 (s,  $\text{C}^2$ '), 29.31 (s,  $\text{C}^3$ '), 28.04 (d,  $^1J_{\text{PC}} = 54.8$  Hz,  $\text{C}^1$ '), 25.57 (s,  $\text{C}^4$ '), 22.44 (s,  $\text{C}^5$ '), 13.89 (s,  $\text{C}^6$ ');  $^{31}\text{P}$ - $\{^1\text{H}\}$  NMR (162 MHz,  $\text{CDCl}_3$ ):  $\delta_p$  = 24.6 (s); MALDI-MS,  $m/z$  421.1  $[\text{M} - \text{CF}_3\text{SO}_3]^+$ . Calculated for  $\text{C}_{28}\text{H}_{36}\text{O}_2\text{P}^+$ : 421.2; Calculated for  $\text{C}_{28}\text{H}_{34}\text{F}_3\text{O}_5\text{PS}$ : C, 58.94; H, 6.01; Found: C, 58.63; H, 6.28.

(2-Hydroxy-3-(octyloxy)propyl)triphenylphosphonium trifluoromethanesulfonate (**3e**). Colorless solid, yield was 163 mg (80 %); mp 79-80 °C; TLC  $R_f$  = 0.62 (benzene/acetonitrile = 3/2); IR (KBr): 3407, 3064, 2927, 2857, 2307, 2214, 1979, 1913, 1825, 1723, 1614, 1589, 1538, 1486, 1466, 1440, 1395, 1378, 1338, 1257, 1225, 1157, 1112, 1030, 998, 881, 824, 783, 748, 722, 691, 638, 573, 541, 513, 444, 413  $\text{cm}^{-1}$ ;  $^1\text{H}$  NMR (400 MHz,  $\text{CDCl}_3$ ):  $\delta$  = 7.78 (m,  $^3J_{\text{HH}} = 7.3$  Hz,  $^5J_{\text{PH}} = 1.8$  Hz,  $^4J_{\text{HH}} = 1.2$  Hz, 3H,  $\text{H}^{\text{Ar}}_p$ ), 7.72 (m,  $^3J_{\text{PH}} = 12.6$  Hz,  $^3J_{\text{HH}} = 7.8$  Hz, 6H,  $\text{H}^{\text{Ar}}_o$ ), 7.67 (m,  $^3J_{\text{HH}} = 7.8$  Hz,  $^4J_{\text{PH}} = 4.0$  Hz, 6H,  $\text{H}^{\text{Ar}}_m$ ), 4.11 (br. s, 1H,  $\text{H}^2$ ), 3.72-3.56 (m, 3H,  $\text{H}^1_B$  overlapped with  $\text{H}^3$ ), 3.52-3.37 (m, 3H,  $\text{H}^1_A$  overlapped with  $\text{H}^1$ ), 1.51 (m,  $^3J_{\text{HH}}$

= 6.7 Hz, 2H, H<sup>2'</sup>) 1.17-1.34 (m, 10 H, H<sup>3'-7'</sup>), 0.86 (t, <sup>3</sup>J<sub>HH</sub> = 6.7 Hz, 3H, H<sup>8'</sup>); <sup>13</sup>C-<sup>1</sup>H} NMR (100.6 MHz, CDCl<sub>3</sub>): δ<sub>C</sub> = 134.94 (d, <sup>4</sup>J<sub>PC</sub> = 3.0 Hz, C<sup>Ar<sub>p</sub></sup>), 133.78 (d, <sup>2</sup>J<sub>PC</sub> = 10.1 Hz, C<sup>Ar<sub>o</sub></sup>), 130.26 (d, <sup>3</sup>J<sub>PC</sub> = 12.8 Hz, C<sup>Ar<sub>m</sub></sup>), 120.58 (κ, <sup>1</sup>J<sub>FC</sub> = 320.2 Hz, CF<sub>3</sub>), 118.70 (d, <sup>1</sup>J<sub>PC</sub> = 87.1 Hz, C<sup>Ar<sub>i</sub></sup>), 73.80 (d, <sup>3</sup>J<sub>PC</sub> = 14.7 Hz, C<sup>3</sup>), 71.68 (s, C<sup>1'</sup>), 65.34 (d, <sup>2</sup>J<sub>PC</sub> = 5.6 Hz, C<sup>2</sup>), 31.80 (s, C<sup>2'</sup>), 29.54 (s, C<sup>3'</sup>), 29.41 (s, C<sup>4'</sup>), 29.28 (s, C<sup>5'</sup>), 28.26 (d, <sup>1</sup>J<sub>PC</sub> = 54.8 Hz, C<sup>1</sup>), 26.09 (s, C<sup>6'</sup>), 22.65 (s, C<sup>7'</sup>), 14.12 (s, C<sup>8'</sup>); <sup>31</sup>P-<sup>1</sup>H} NMR (162MHz, CDCl<sub>3</sub>): δ<sub>P</sub> = 24.3 (s); MALDI-MS, *m/z* 449.3 [M – CF<sub>3</sub>SO<sub>3</sub>]<sup>+</sup>. Calculated for: C<sub>30</sub>H<sub>40</sub>O<sub>2</sub>P<sup>+</sup>: 449.3; Calculated for: C<sub>30</sub>H<sub>38</sub>F<sub>3</sub>O<sub>5</sub>PS: C, 60.19; H, 6.40; Found: C, 59.87; H, 6.65.

*(3-(Decyloxy)-2-hydroxypropyl)triphenylphosphonium trifluoromethanesulfonate (3f)*. Colorless solid, mp 78-79 °C, yield was 171 mg (80 %); IR (KBr): C: 3381, 3066, 2927, 2856, 2795, 1486, 1467, 1459, 1440, 1406, 1363, 1287, 1246, 1227, 1162, 1111, 1031, 997, 950, 879, 838, 791, 748, 724, 715, 689, 640, 573, 530, 510, 497, 465 cm<sup>-1</sup>; <sup>1</sup>H NMR (400 MHz, CDCl<sub>3</sub>): δ = 7.75 (m, <sup>3</sup>J<sub>HH</sub> = 7.2 Hz, <sup>5</sup>J<sub>PH</sub> = 2.0 Hz, <sup>4</sup>J<sub>HH</sub> 1.5 Hz, 3H, H<sup>Ar<sub>p</sub></sup>), 7.68 (m, <sup>3</sup>J<sub>PH</sub> = 12.5 Hz, <sup>3</sup>J<sub>HH</sub> = 7.2 Hz, <sup>4</sup>J<sub>HH</sub> = 1.5 Hz, 6H, H<sup>Ar<sub>o</sub></sup>), 7.64 (m, <sup>3</sup>J<sub>HH</sub> = 7.2 Hz, <sup>3</sup>J<sub>HH</sub> = 7.2 Hz, <sup>4</sup>J<sub>PH</sub> = 3.6 Hz, 6H, H<sup>Ar<sub>m</sub></sup>), 4.08 (m, 1H, H<sup>2</sup>), 3.98 (br. s, 1H, OH), 3.54-3.55 (m, 3H, H<sup>1<sub>A</sub></sup> overlapped with H<sup>3</sup>), 3.37-3.40 (m, 3H, H<sup>1<sub>B</sub></sup> overlapped with H<sup>1'</sup>), 1.49 (m, <sup>3</sup>J<sub>HH</sub> = 7.0 Hz, 2 H, H<sup>2'</sup>), 1.20-1.23 (m, 14H, H<sup>3'-H<sup>9'</sup></sup>), 0.84 (t, <sup>3</sup>J<sub>HH</sub> = 7.0 Hz, 3H, H<sup>10'</sup>); <sup>13</sup>C-<sup>1</sup>H} NMR (100.6 MHz, CDCl<sub>3</sub>): δ<sub>C</sub> = 134.91 (d, <sup>4</sup>J<sub>PC</sub> = 3.0 Hz, C<sup>Ar<sub>p</sub></sup>), 133.71 (d, <sup>2</sup>J<sub>PC</sub> = 10.3 Hz, C<sup>Ar<sub>o</sub></sup>), 130.22 (d, <sup>3</sup>J<sub>PC</sub> = 7.2 Hz, C<sup>Ar<sub>m</sub></sup>), 120.58 (q, <sup>1</sup>J<sub>FC</sub> = 320.4 Hz, CF<sub>3</sub>), 118.63 (d, <sup>1</sup>J<sub>PC</sub> = 87.1 Hz, C<sup>Ar<sub>i</sub></sup>), 73.79 (d, <sup>3</sup>J<sub>PC</sub> = 14.6 Hz, C<sup>3</sup>), 71.61 (s, C<sup>1'</sup>), 65.26 (d, <sup>2</sup>J<sub>PC</sub> = 5.7 Hz, C<sup>2</sup>), 32.84 (s, C<sup>2'</sup>), 29.58 (s, C<sup>3'</sup>), 29.51 (s, C<sup>4'-5'</sup>), 29.41 (s, C<sup>6'</sup>), 29.27 (s, C<sup>7'</sup>), 28.15 (d, <sup>1</sup>J<sub>PC</sub> = 54.6 Hz, C<sup>1</sup>), 26.05 (s, C<sup>8'</sup>), 22.63 (s, C<sup>9'</sup>), 14.10 (s, C<sup>10'</sup>); <sup>31</sup>P-<sup>1</sup>H} NMR (162MHz, CDCl<sub>3</sub>): δ<sub>P</sub> = 24.2 (s); MALDI-MS, *m/z* 477.4 [M – CF<sub>3</sub>SO<sub>3</sub>]<sup>+</sup>. Calculated for C<sub>32</sub>H<sub>44</sub>O<sub>2</sub>P<sup>+</sup>: 477.3; Calculated for C<sub>32</sub>H<sub>42</sub>F<sub>3</sub>O<sub>5</sub>PS: C, 61.33; H, 6.76; Found: C, 61.02; H, 7.01.

*(3-(Dodecyloxy)-2-hydroxypropyl)triphenylphosphonium trifluoromethanesulfonate (3g)*

Colorless solid, mp 73-74 °C, yield was 197 mg (84 %); TLC *R<sub>f</sub>* = 0.62 (benzene/acetonitrile = 3/2); IR (KBr): 3399, 3064, 2925, 2855, 1825, 1773, 1719, 1637, 1590, 1542, 1485, 1468, 1440, 1408, 1368, 1338, 1288, 1244, 1226, 1163, 1112, 1030, 997, 840, 749, 725, 716, 690, 640, 573 cm<sup>-1</sup>; <sup>1</sup>H NMR (400 MHz, CDCl<sub>3</sub>): δ = 7.75 (m, <sup>3</sup>J<sub>HH</sub> = 7.2 Hz, <sup>5</sup>J<sub>PH</sub> = 2.0 Hz, <sup>4</sup>J<sub>HH</sub> 1.5 Hz, 3H, H<sup>Ar<sub>p</sub></sup>), 7.68 (m, <sup>3</sup>J<sub>PH</sub> = 12.5 Hz, <sup>3</sup>J<sub>HH</sub> = 7.2 Hz, <sup>4</sup>J<sub>HH</sub> = 1.5 Hz, 6H, H<sup>Ar<sub>o</sub></sup>), 7.64 (m, <sup>3</sup>J<sub>HH</sub> = 7.2 Hz, <sup>3</sup>J<sub>HH</sub> = 7.2 Hz, <sup>4</sup>J<sub>PH</sub> = 3.6 Hz, 6H, H<sup>Ar<sub>m</sub></sup>), 4.08 (m, 1H, H<sup>2</sup>), 3.98 (br. s, 1H, OH), 3.54-3.55 (m, 3H, H<sup>1<sub>A</sub></sup> overlapped with H<sup>3</sup>), 3.37-3.40 (m, 3H, H<sup>1<sub>B</sub></sup> overlapped with H<sup>1'</sup>), 1.49 (m, <sup>3</sup>J<sub>HH</sub> = 7.0 Hz, 2H, H<sup>2'</sup>), 1.20-1.23 (m, 18H, H<sup>3'-H<sup>11'</sup></sup>), 0.84 (t, <sup>3</sup>J<sub>HH</sub> = 7.0 Hz, 3H, H<sup>12'</sup>); <sup>13</sup>C-<sup>1</sup>H} NMR (100.6 MHz, CDCl<sub>3</sub>): δ<sub>C</sub> = 135.0 (d, <sup>4</sup>J<sub>PC</sub> = 2.9 Hz, C<sup>Ar<sub>p</sub></sup>), 133.87 (d, <sup>2</sup>J<sub>PC</sub> = 10.3 Hz, C<sup>Ar<sub>o</sub></sup>), 130.33 (d, <sup>3</sup>J<sub>PC</sub> = 12.8 Hz, C<sup>Ar<sub>m</sub></sup>), 120.64 (κ, <sup>1</sup>J<sub>FC</sub> = 320.4 Hz, CF<sub>3</sub>), 118.77 (d, <sup>1</sup>J<sub>PC</sub> = 87.3 Hz, C<sup>Ar<sub>i</sub></sup>), 73.88 (d, <sup>3</sup>J<sub>PC</sub> = 14.8 Hz, C<sup>3</sup>), 71.76 (s, C<sup>1'</sup>), 65.42 (d, <sup>2</sup>J<sub>PC</sub> = 5.9 Hz, C<sup>2</sup>), 31.99 (s, C<sup>2'</sup>), 29.74 (s, C<sup>3'</sup>), 29.71 (s, C<sup>4'</sup> overlapped with C<sup>5'</sup>), 29.69 (s, C<sup>6'</sup>), 29.63 (s, C<sup>7'</sup>), 29.54 (6s, C<sup>8'</sup>), 29.43 (s, C<sup>9'</sup>), 28.38 (d, <sup>1</sup>J<sub>PC</sub> = 54.7 Hz, C<sup>1</sup>), 26.17 (s, C<sup>10'</sup>), 22.76 (s, C<sup>11'</sup>), 14.22 (s, C<sup>12'</sup>); <sup>31</sup>P-<sup>1</sup>H} NMR (162 MHz, CDCl<sub>3</sub>): δ<sub>P</sub> = 25.1 (s); ESI-MS, *m/z* 505.29 [M – CF<sub>3</sub>SO<sub>3</sub>]<sup>+</sup>. Calculated for C<sub>34</sub>H<sub>48</sub>O<sub>2</sub>P<sup>+</sup>: 505.32; Calculated for C<sub>34</sub>H<sub>46</sub>F<sub>3</sub>O<sub>5</sub>PS: C, 62.37; H, 7.08; Found: C, 62.05; H, 7.33.

*(2-Hydroxy-3-(tetradecyloxy)propyl)triphenylphosphonium trifluoromethanesulfonate (3h).*

Colorless solid, mp 70-72 °C, yield was 203 mg (87 %); TLC  $R_f$  = 0.62 (benzene/acetonitrile = 3/2); IR (KBr): 3405, 2925, 2854, 1637, 1486, 1468, 1440, 1369, 1287, 1244, 1225, 1163, 1112, 1030, 997, 884, 840, 794, 749, 725, 716, 691, 640, 573  $\text{cm}^{-1}$ ;  $^1\text{H}$  NMR (400 MHz,  $\text{CDCl}_3$ ):  $\delta$  = 7.75 (m,  $^3J_{\text{HH}} = 7.2$  Hz,  $^5J_{\text{PH}} = 2.0$  Hz,  $^4J_{\text{HH}} = 1.5$  Hz, 3H,  $\text{H}^{\text{Ar}_p}$ ), 7.68 (m,  $^3J_{\text{PH}} = 12.5$  Hz,  $^3J_{\text{HH}} = 7.2$  Hz,  $^4J_{\text{HH}} = 1.5$  Hz, 6H,  $\text{H}^{\text{Ar}_o}$ ), 7.64 (m,  $^3J_{\text{HH}} = 7.2$  Hz,  $^3J_{\text{HH}} = 7.2$  Hz,  $^4J_{\text{PH}} = 3.6$  Hz, 6H,  $\text{H}^{\text{Ar}_m}$ ), 4.08 (m, 1H,  $\text{H}^2$ ), 3.98 (br. s, 1H, OH), 3.54-3.55 (m, 3H,  $\text{H}^1_{\text{A}}$  overlapped with  $\text{H}^3$ ), 3.37-3.40 (m, 3H,  $\text{H}^1_{\text{B}}$  overlapped with  $\text{H}^1$ ), 1.49 (m,  $^3J_{\text{HH}} = 7.0$  Hz, 2H,  $\text{H}^2$ ), 1.20-1.23 (m, 22H,  $\text{H}^3$ - $\text{H}^{13}$ ), 0.84 (t,  $^3J_{\text{HH}} = 7.0$  Hz, 3H,  $\text{H}^{14}$ );  $^{13}\text{C}$ - $\{^1\text{H}\}$  NMR (100.6 MHz,  $\text{CDCl}_3$ ):  $\delta_{\text{C}}$  = 135.0 (d,  $^4J_{\text{PC}} = 3.2$  Hz,  $\text{C}^{\text{Ar}_p}$ ), 133.89 (d,  $^2J_{\text{PC}} = 10.2$  Hz,  $\text{C}^{\text{Ar}_o}$ ), 130.33 (d,  $^3J_{\text{PC}} = 12.7$  Hz,  $\text{C}^{\text{Ar}_m}$ ), 120.64 (q,  $^1J_{\text{FC}} = 320.1$  Hz,  $\text{CF}_3$ ), 118.85 (d,  $^1J_{\text{PC}} = 87.0$  Hz,  $\text{C}^{\text{Ar}_i}$ ), 73.92 (d,  $^3J_{\text{PC}} = 14.4$  Hz,  $\text{C}^3$ ), 71.80 (s,  $\text{C}^1$ ), 65.45 (d,  $^2J_{\text{PC}} = 5.2$  Hz,  $\text{C}^2$ ), 32.01 (s,  $\text{C}^{3'}$ ), 29.78 (s,  $\text{C}^{4'}$  overlapped with  $\text{C}^{5'}$ ), 29.75 (s,  $\text{C}^6$ ), 29.73 (s,  $\text{C}^7$ ), 29.72 (s,  $\text{C}^8$ ), 29.65 (s,  $\text{C}^9$ ), 29.57 (s,  $\text{C}^{10}$ ), 29.45 (s,  $\text{C}^{11}$ ), 28.39 (d,  $^1J_{\text{PC}} = 54.6$  Hz,  $\text{C}^1$ ), 26.19 (s,  $\text{C}^{12}$ ), 22.78 (s,  $\text{C}^{13}$ ), 14.22 (s,  $\text{C}^{14}$ );  $^{31}\text{P}$ - $\{^1\text{H}\}$  NMR (162 MHz,  $\text{CDCl}_3$ ):  $\delta_{\text{P}} = 25.1$  (s); ESI-MS,  $m/z$  533.33 [ $\text{M} - \text{CF}_3\text{SO}_3$ ] $^+$ . Calculated for  $\text{C}_{36}\text{H}_{52}\text{O}_2\text{P}^+$ : 533.35; Calculated for  $\text{C}_{36}\text{H}_{50}\text{F}_3\text{O}_5\text{PS}$ : C, 63.33; H, 7.38; Found: C, 63.01; H, 7.62.

*(3-(Hexadecyloxy)-2-hydroxypropyl)triphenylphosphonium trifluoromethanesulfonate (3i).* Colorless solid, mp 67 °C, yield was 193 mg (52 %); TLC  $R_f$  = 0.62 (benzene/acetonitrile = 3/2); IR (KBr): 3396, 3063, 2924, 2854, 1982, 1912, 1825, 1779, 1589, 1486, 1466, 1440, 1384, 1340, 1278, 1259, 1225, 1159, 1113, 1031, 998, 895, 825, 783, 748, 722, 691, 639, 573, 542, 514, 439  $\text{cm}^{-1}$ ;  $^1\text{H}$  NMR (400 MHz,  $\text{CDCl}_3$ ): 7.75 (m,  $^3J_{\text{HH}} = 7.2$  Hz,  $^5J_{\text{PH}} = 2.0$  Hz,  $^4J_{\text{HH}} = 1.5$  Hz, 3H,  $\text{H}^{\text{Ar}_p}$ ), 7.68 (m,  $^3J_{\text{PH}} = 12.5$  Hz,  $^3J_{\text{HH}} = 7.2$  Hz,  $^4J_{\text{HH}} = 1.5$  Hz, 6H,  $\text{H}^{\text{Ar}_o}$ ), 7.64 (m,  $^3J_{\text{HH}} = 7.2$  Hz,  $^3J_{\text{HH}} = 7.2$  Hz,  $^4J_{\text{PH}} = 3.6$  Hz, 6H,  $\text{H}^{\text{Ar}_m}$ ), 4.08 (m, 1H,  $\text{H}^2$ ), 3.98 (br. s, 1H, OH), 3.54-3.55 (m, 3H,  $\text{H}^1_{\text{A}}$  overlapped with  $\text{H}^3$ ), 3.37-3.40 (m, 3H,  $\text{H}^1_{\text{B}}$  overlapped with  $\text{H}^1$ ), 1.49 (m,  $^3J_{\text{HH}} = 7.0$  Hz, 2H,  $\text{H}^2$ ), 1.20-1.23 (m, 26H,  $\text{H}^3$ - $\text{H}^{15}$ ), 0.84 (t,  $^3J_{\text{HH}} = 7.0$  Hz, 3H,  $\text{H}^{16}$ );  $^{13}\text{C}$ - $\{^1\text{H}\}$  NMR (100.6 MHz,  $\text{CDCl}_3$ ):  $\delta_{\text{C}}$  = 135.02 (d,  $^4J_{\text{PC}} = 3.0$  Hz,  $\text{C}^{\text{Ar}_p}$ ), 133.95 (d,  $^2J_{\text{PC}} = 10.3$  Hz,  $\text{C}^{\text{Ar}_o}$ ), 130.36 (d,  $^3J_{\text{PC}} = 12.8$  Hz,  $\text{C}^{\text{Ar}_m}$ ), 123.90 (q,  $^1J_{\text{CF}} = 320.1$  Hz,  $\text{CF}_3$ ), 118.94 (d,  $^1J_{\text{PC}} = 86.9$  Hz,  $\text{C}^{\text{Ar}_i}$ ), 73.94 (d,  $^3J_{\text{PC}} = 14.8$  Hz,  $\text{C}^3$ ), 71.84 (s,  $\text{C}^1$ ), 65.53 (d,  $^2J_{\text{PC}} = 5.7$  Hz,  $\text{C}^2$ ), 32.03 (s,  $\text{C}^{3'}$ ), 29.80 (s,  $\text{C}^{4'}$  overlapped with  $\text{C}^{5'-9'}$ ), 29.77 (s,  $\text{C}^{10}$ ), 29.69 (s,  $\text{C}^{11}$ ), 29.59 (s,  $\text{C}^{12}$ ), 29.46 (s,  $\text{C}^{13}$ ), 28.49 (d,  $^1J_{\text{PC}} = 54.9$  Hz,  $\text{C}^1$ ), 26.22 (s,  $\text{C}^{14}$ ), 22.79 (s,  $\text{C}^{15}$ ), 14.21 (s,  $\text{C}^{16}$ );  $^{31}\text{P}$ - $\{^1\text{H}\}$  NMR (162 MHz,  $\text{CDCl}_3$ ):  $\delta_{\text{P}} = 24.5$  (s); MALDI-MS,  $m/z$  561.3 [ $\text{M} - \text{CF}_3\text{SO}_3$ ] $^+$ . Calculated for  $\text{C}_{38}\text{H}_{56}\text{O}_2\text{P}^+$ : 561.4; Calculated for  $\text{C}_{38}\text{H}_{54}\text{F}_3\text{O}_5\text{PS}$ : C, 64.21; H, 7.66; Found: C, 63.89; H, 7.92.

*(2-Hydroxy-3-(octadecyloxy)propyl)triphenylphosphonium trifluoromethanesulfonate (3j).* Colorless solid, mp 64-65 °C, yield was 197 mg (78 %); TLC  $R_f$  = 0.62 (benzene/acetonitrile = 3/2); IR (KBr): 3406, 3064, 3000, 2924, 2854, 1983, 1913, 1712, 1589, 1486, 1466, 1440, 1363, 1278, 1260, 1224, 1158, 1113, 1031, 998, 902, 826, 784, 750, 723, 692, 639, 573, 531, 514, 439  $\text{cm}^{-1}$ ;  $^1\text{H}$  NMR (400 MHz,  $\text{CDCl}_3$ ):  $\delta$  = 7.75 (m,  $^3J_{\text{HH}} = 7.2$  Hz,  $^5J_{\text{PH}} = 2.0$  Hz,  $^4J_{\text{HH}} = 1.5$  Hz, 3H,  $\text{H}^{\text{Ar}_p}$ ), 7.68 (m,  $^3J_{\text{PH}} = 12.5$  Hz,  $^3J_{\text{HH}} = 7.2$  Hz,  $^4J_{\text{HH}} = 1.5$  Hz, 6H,  $\text{H}^{\text{Ar}_o}$ ), 7.64 (m,  $^3J_{\text{HH}} = 7.2$  Hz,  $^3J_{\text{HH}} = 7.2$  Hz,  $^4J_{\text{PH}} = 3.6$  Hz, 6H,  $\text{H}^{\text{Ar}_m}$ ), 4.08 (m, 1H,  $\text{H}^2$ ), 3.98

(br. s, 1H, OH), 3.54-3.55 (m, 3H, H<sup>1</sup><sub>A</sub> overlapped with H<sup>3</sup>), 3.37-3.40 (m, 3H, H<sup>1</sup><sub>B</sub> overlapped with H<sup>1</sup>'), 1.49 (m, <sup>3</sup>J<sub>HH</sub> = 7.0 Hz, 2 H, H<sup>2</sup>'), 1.20-1.23 (m, 30 H, H<sup>3</sup>'-H<sup>17</sup>'), 0.84 (t, <sup>3</sup>J<sub>HH</sub> = 7.0 Hz, 3 H, H<sup>18</sup>'); <sup>13</sup>C-<sup>1</sup>H} NMR (100.6 MHz, CDCl<sub>3</sub>): δ<sub>C</sub> = 135.02 (d, <sup>4</sup>J<sub>PC</sub> = 3.1 Hz, C<sup>Ar<sub>p</sub></sup>), 133.98 (d, <sup>2</sup>J<sub>PC</sub> = 10.2 Hz, C<sup>Ar<sub>o</sub></sup>), 130.37 (d, <sup>3</sup>J<sub>PC</sub> = 12.7 Hz, C<sup>Ar<sub>m</sub></sup>), 121.24 (κ, <sup>1</sup>J<sub>FC</sub> = 320.0 Hz, CF<sub>3</sub>), 118.96 (d, <sup>1</sup>J<sub>PC</sub> = 87.1 Hz, C<sup>Ar<sub>i</sub></sup>), 73.97 (d, <sup>3</sup>J<sub>PC</sub> = 14.9 Hz, C<sup>3</sup>), 71.85 (s, C<sup>1</sup>'), 65.56 (d, <sup>2</sup>J<sub>PC</sub> = 5.7, C<sup>2</sup> Hz), 29.82 (s, C<sup>3</sup>'), 29.77 (s, C<sup>4</sup>' overlapped with C<sup>5</sup>'-<sup>10</sup>'), 29.70 (s, C<sup>12</sup>' overlapped with C<sup>11</sup>'), 29.60 (s, C<sup>13</sup>'), 29.47 (s, C<sup>14</sup>'), 28.55 (d, <sup>1</sup>J<sub>PC</sub> = 54.7 Hz, C<sup>1</sup>), 26.23 (s, C<sup>15</sup>'), 22.80 (s, C<sup>17</sup>'), 14.22 (s, C<sup>18</sup>'); <sup>31</sup>P-<sup>1</sup>H} NMR (162 MHz, CDCl<sub>3</sub>): δ<sub>P</sub> = 24.91 (s); MALDI-MS, *m/z* 589.3 [M – CF<sub>3</sub>SO<sub>3</sub>]<sup>+</sup>. Calculated for C<sub>40</sub>H<sub>60</sub>O<sub>2</sub>P<sup>+</sup>: 589.4; Calculated for C<sub>40</sub>H<sub>58</sub>F<sub>3</sub>O<sub>5</sub>PS: C, 65.02; H, 7.91; Found: C, 64.71; H, 8.16.

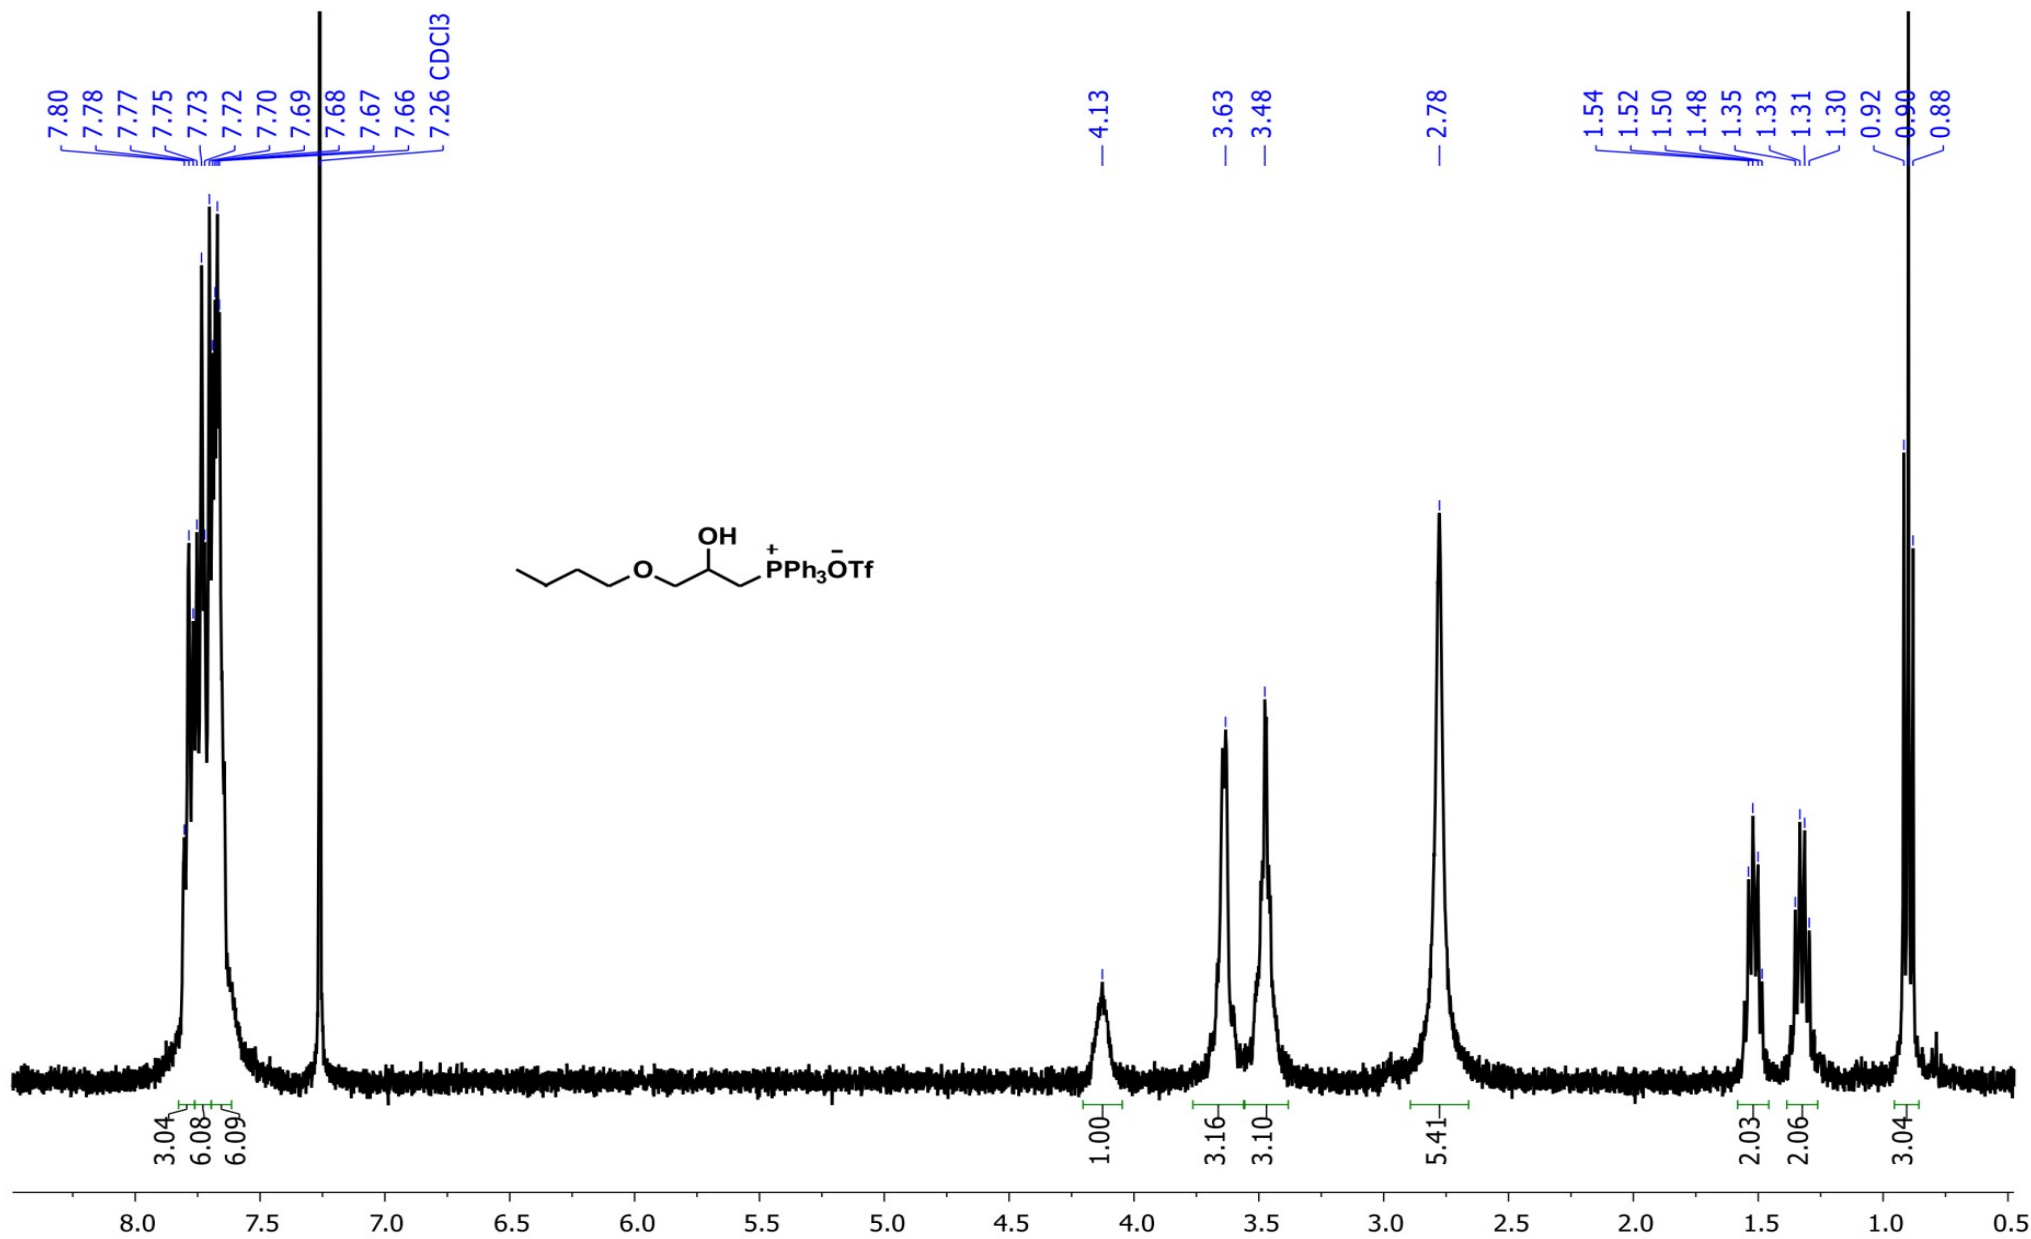

Figure S56.  $^1\text{H}$  NMR spectrum (400 MHz,  $\text{CDCl}_3$ ) of compound 3c.

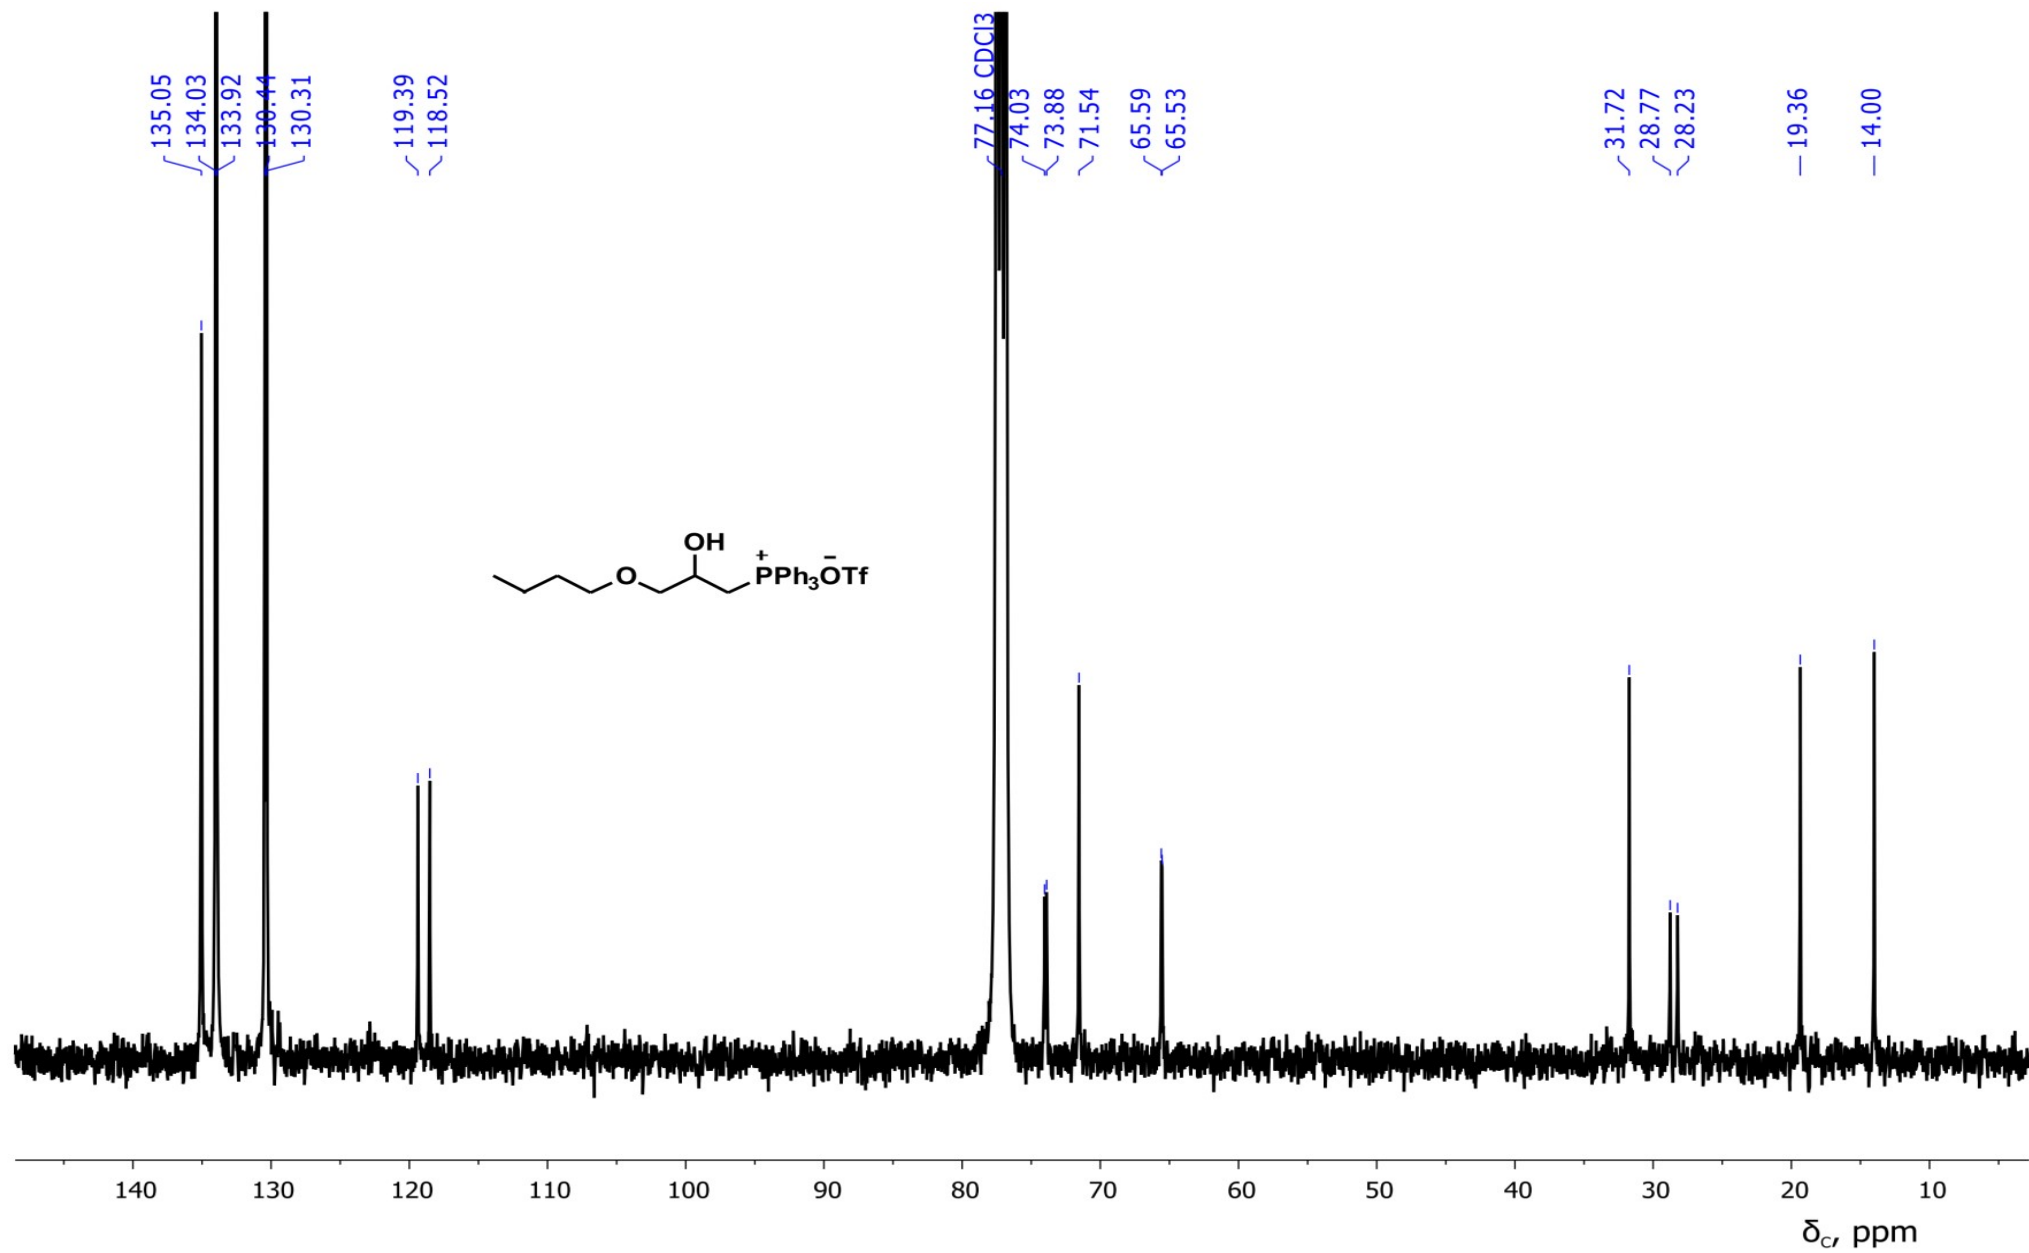

Figure S57.  $^{13}\text{C}$ - $\{^1\text{H}\}$  NMR spectrum (100.6 MHz,  $\text{CDCl}_3$ ) of compound 3c.

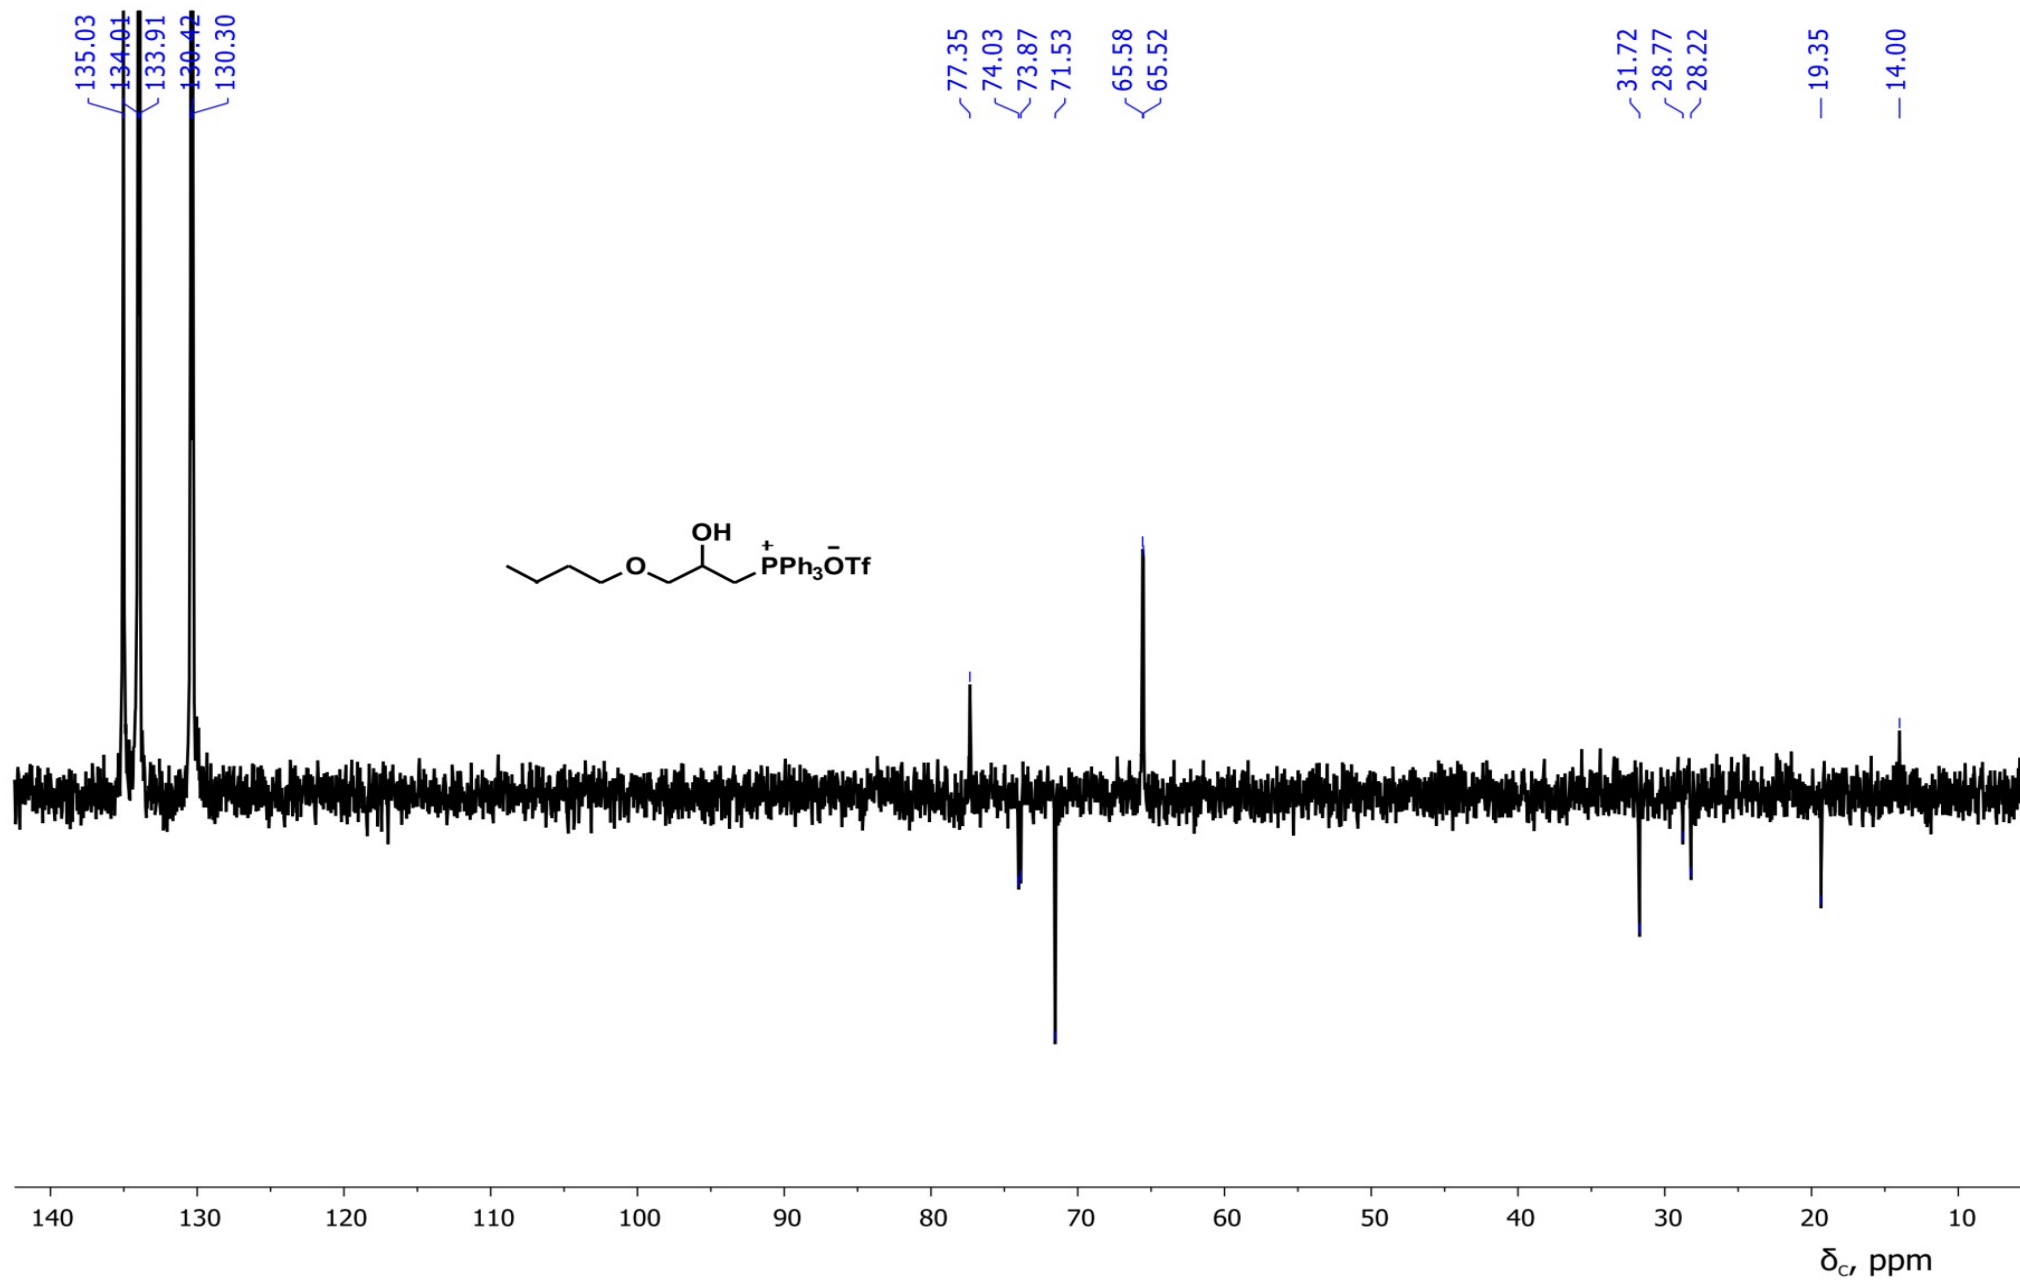

Figure S58.  $^{13}\text{C}$ - $\{^1\text{H}\}$  APT NMR spectrum (100.6 MHz,  $\text{CDCl}_3$ ) of compound 3c.

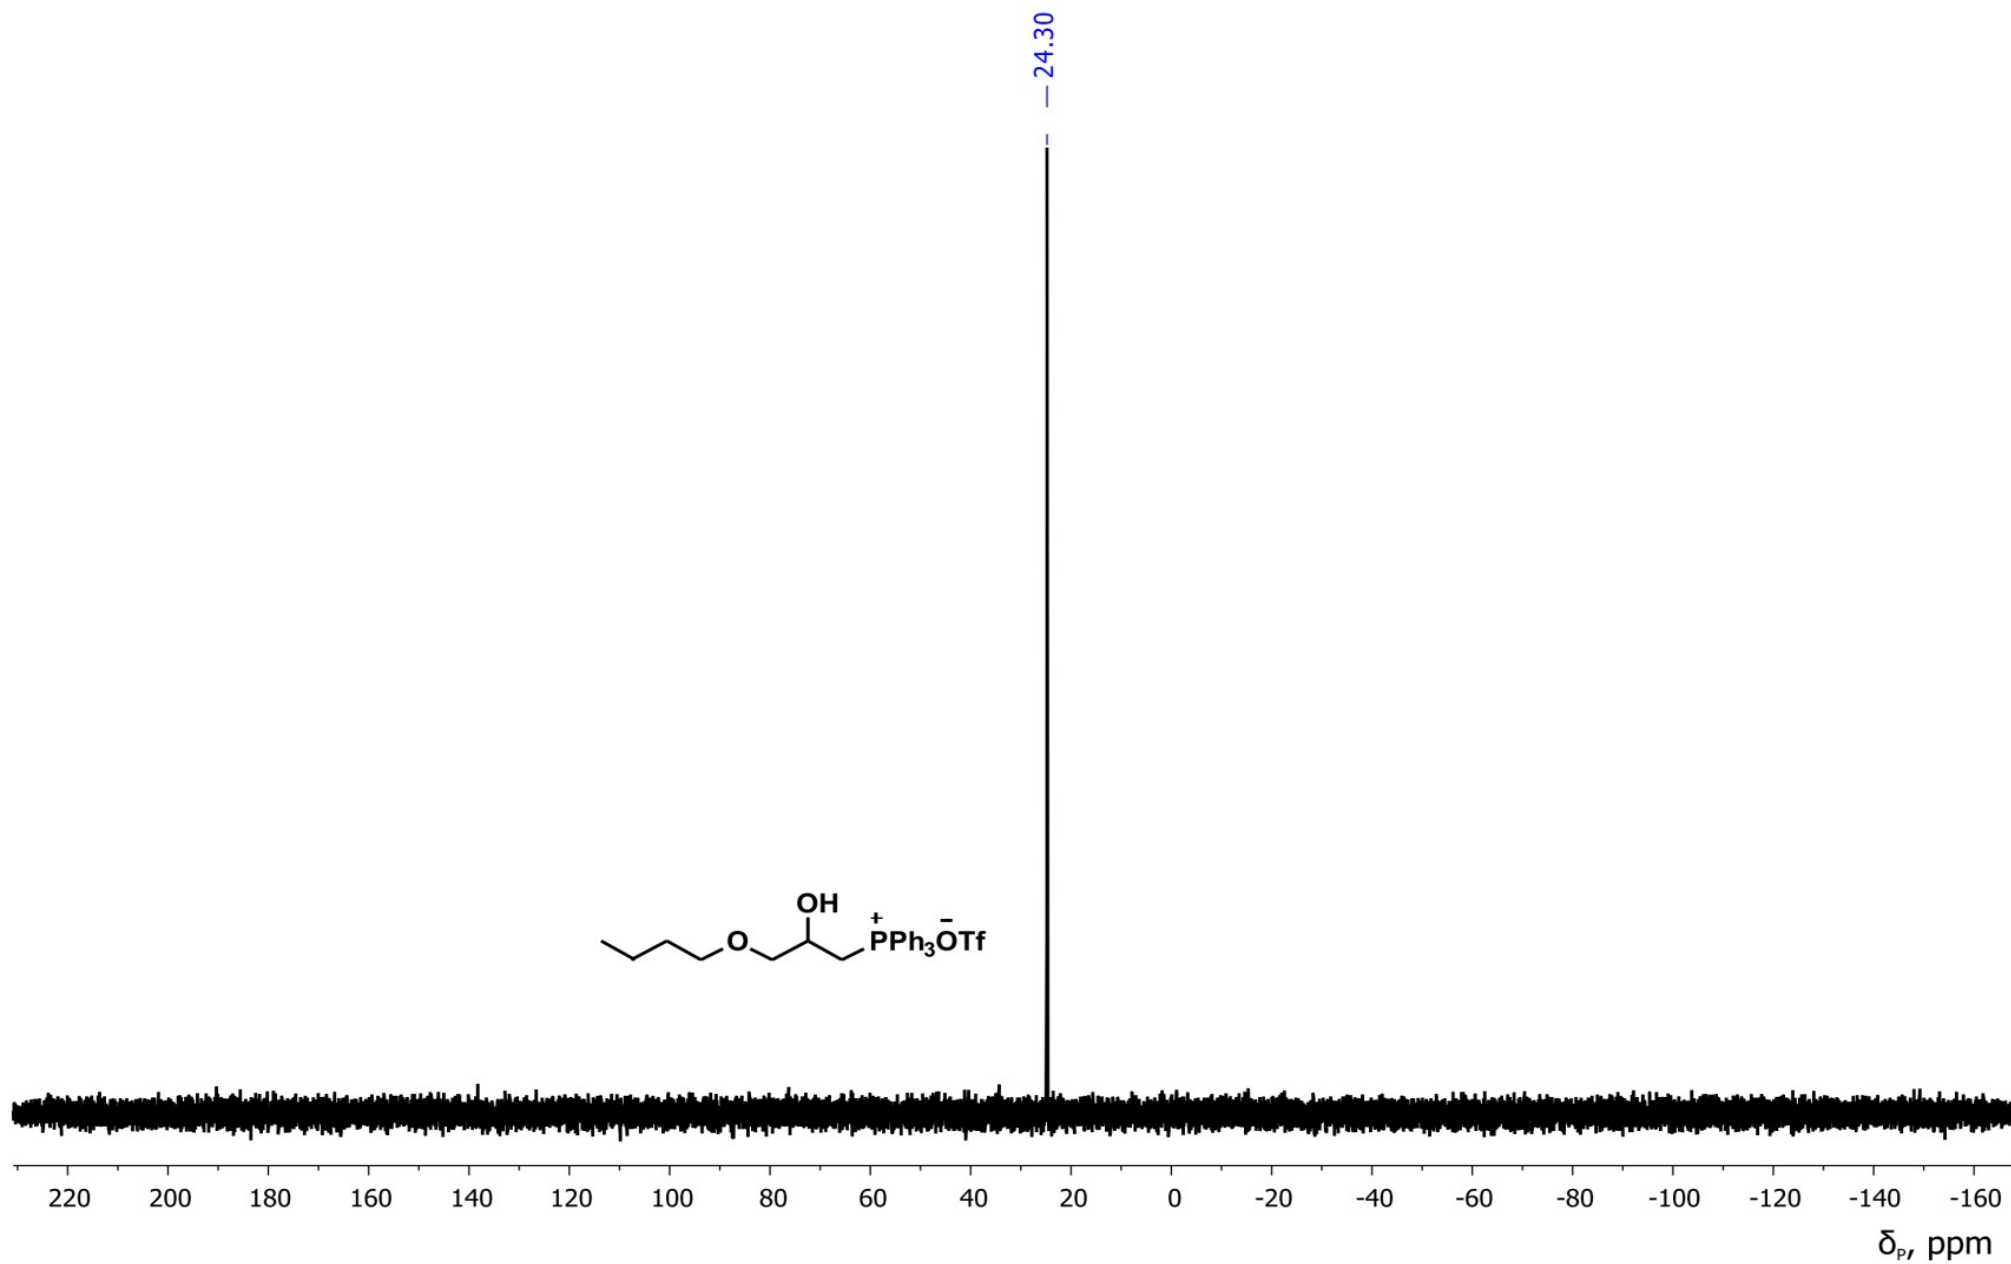

**Figure S59.**  $^{31}\text{P}$ - $\{^1\text{H}\}$  NMR spectrum (162 MHz,  $\text{CDCl}_3$ ) of compound **3c**.

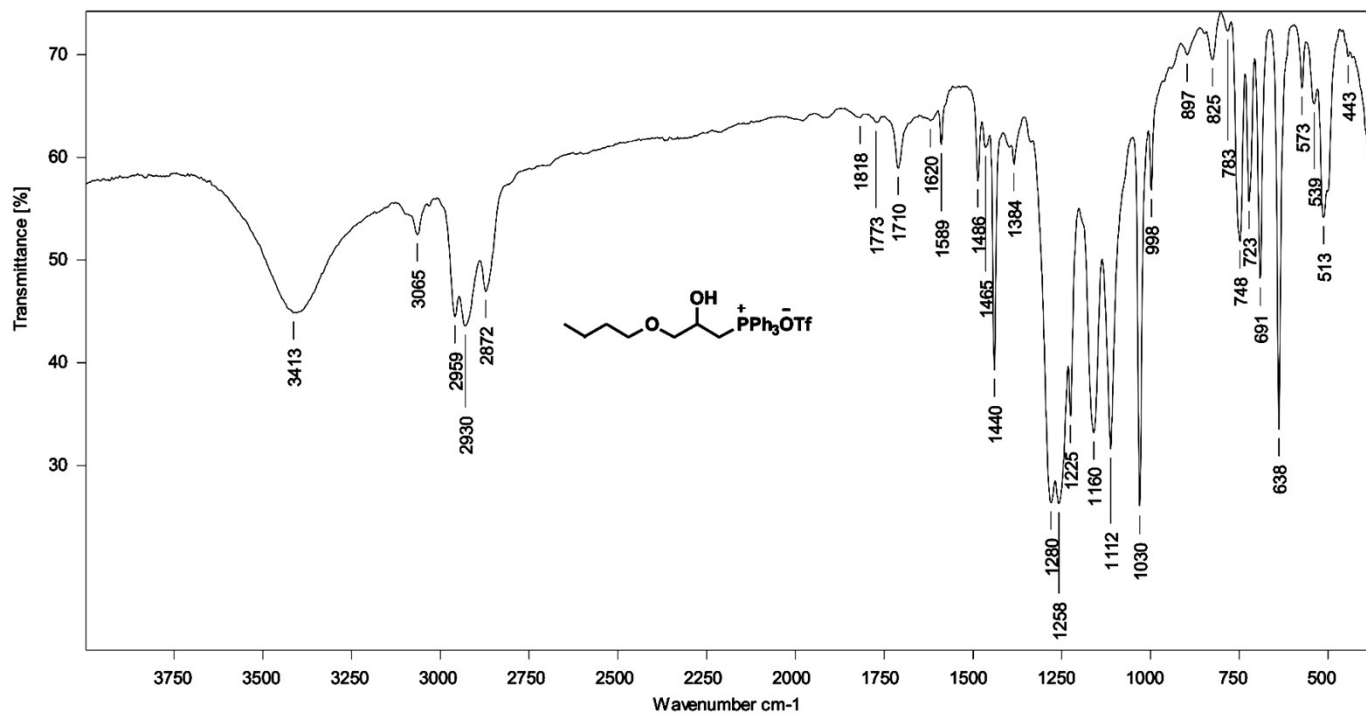

Figure S60. IR spectrum (KBr) of compound 3c.

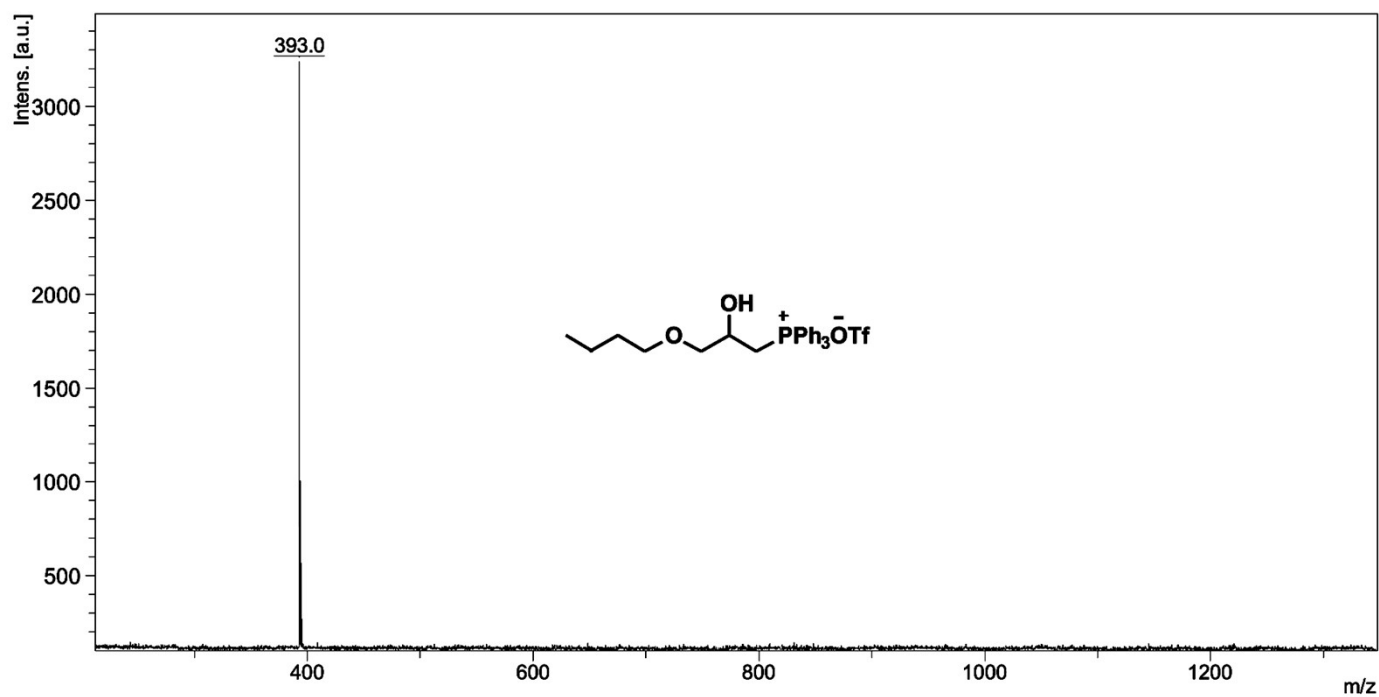

Figure S61. MALDI-MS spectrum of compound 3c.

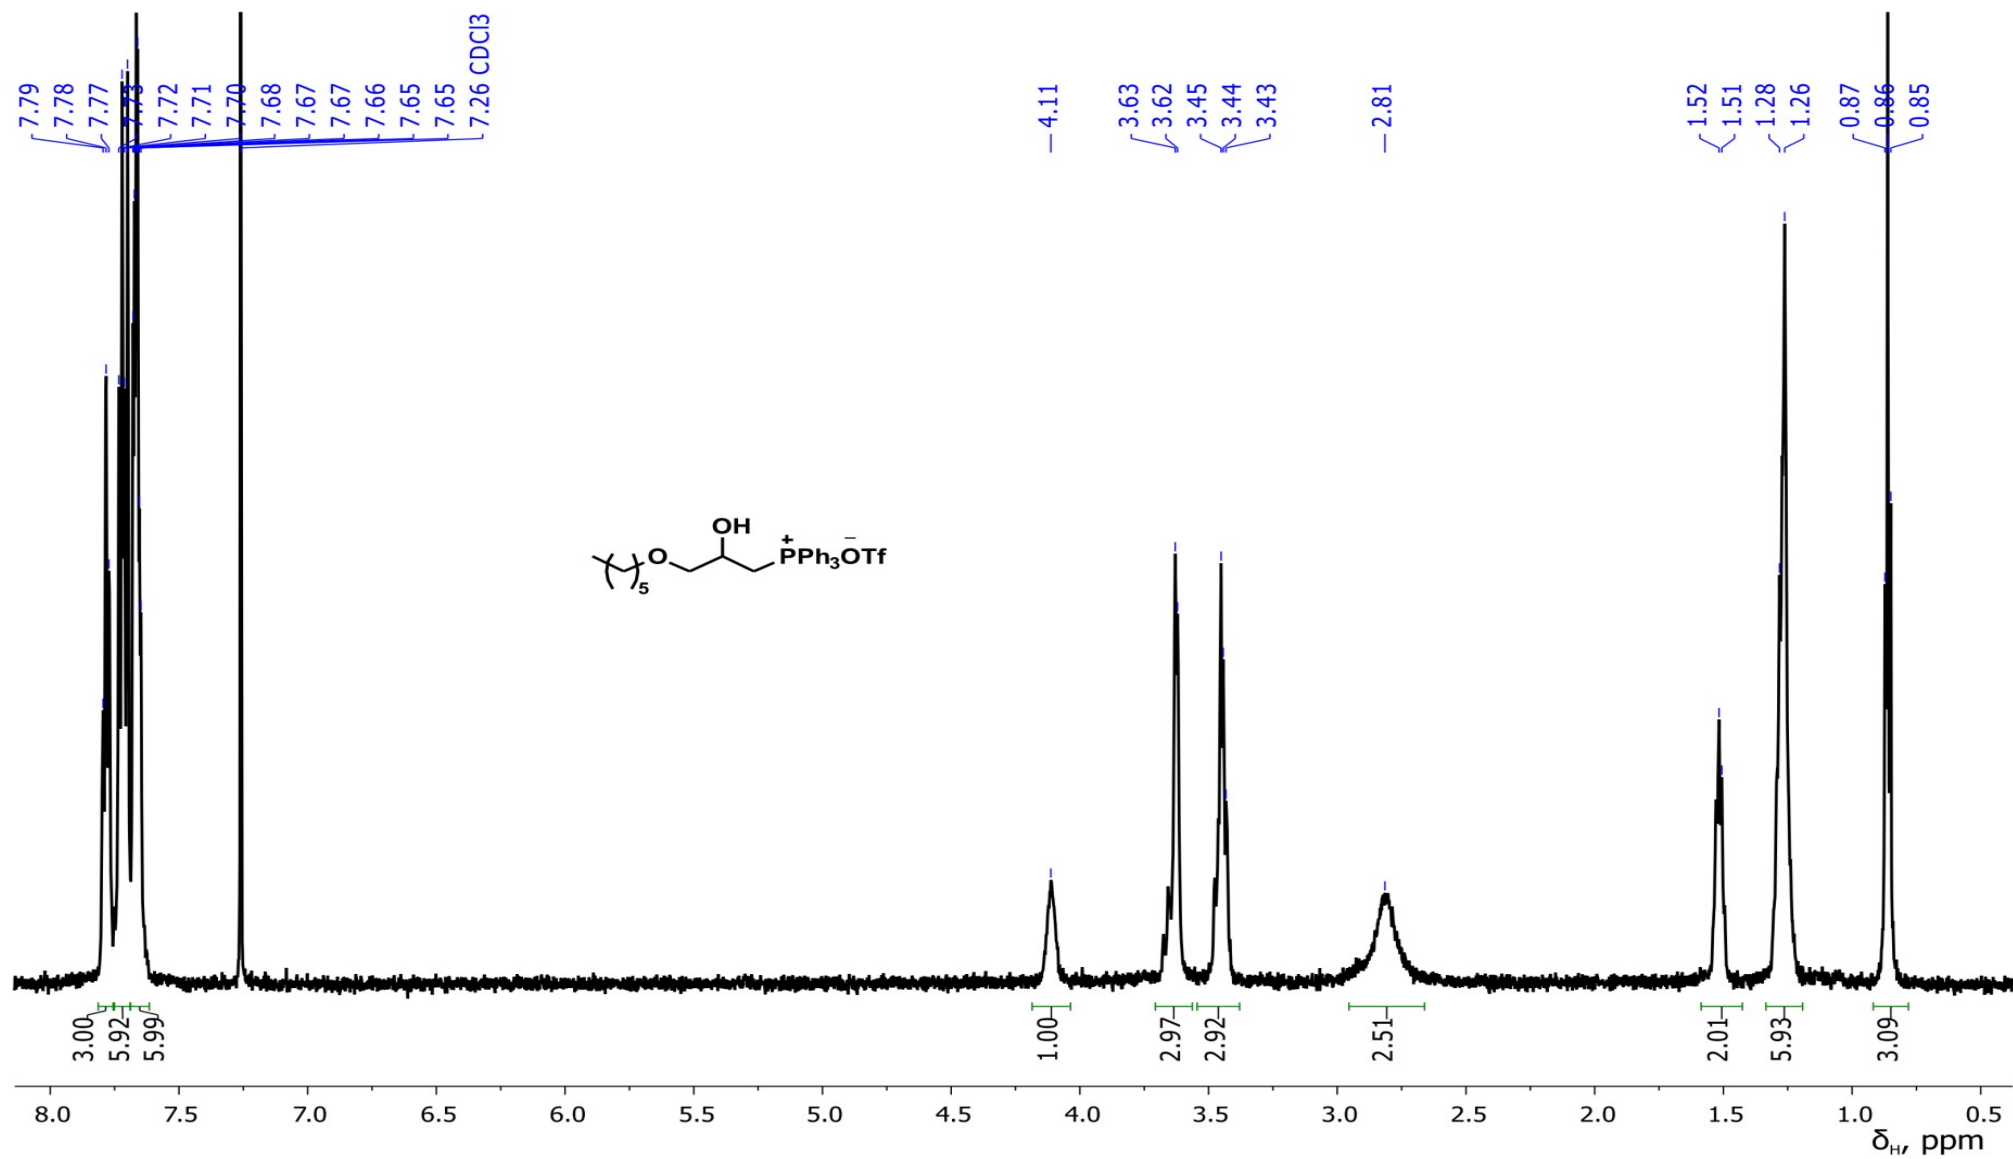

Figure S62.  $^1\text{H}$  NMR spectrum (600 MHz,  $\text{CDCl}_3$ ) of compound **3d**.

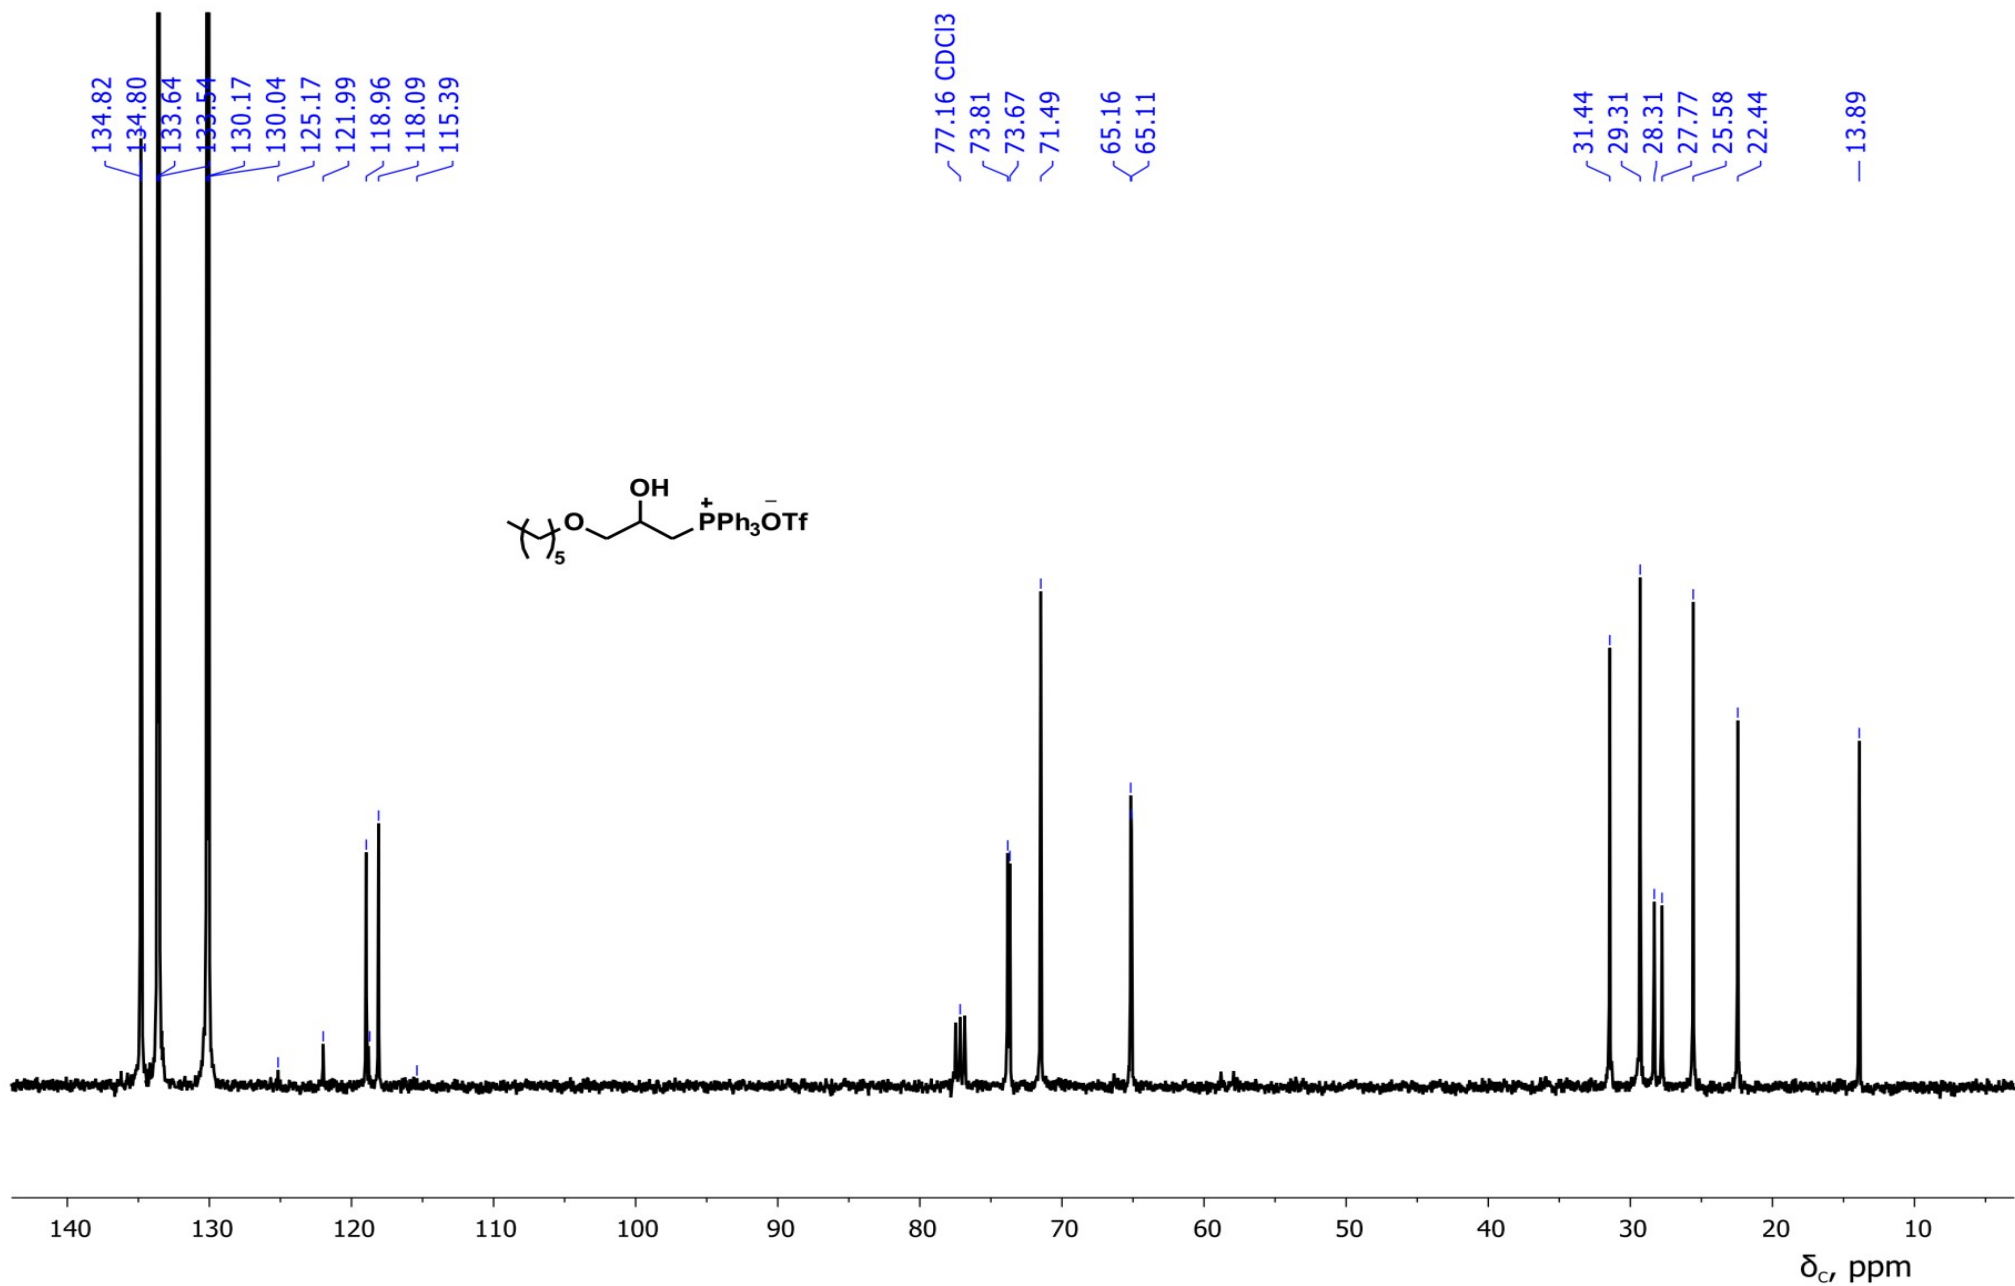

Figure S63.  $^{13}\text{C}$ - $\{^1\text{H}\}$  NMR spectrum (100.6 MHz,  $\text{CDCl}_3$ ) of compound **3d**.

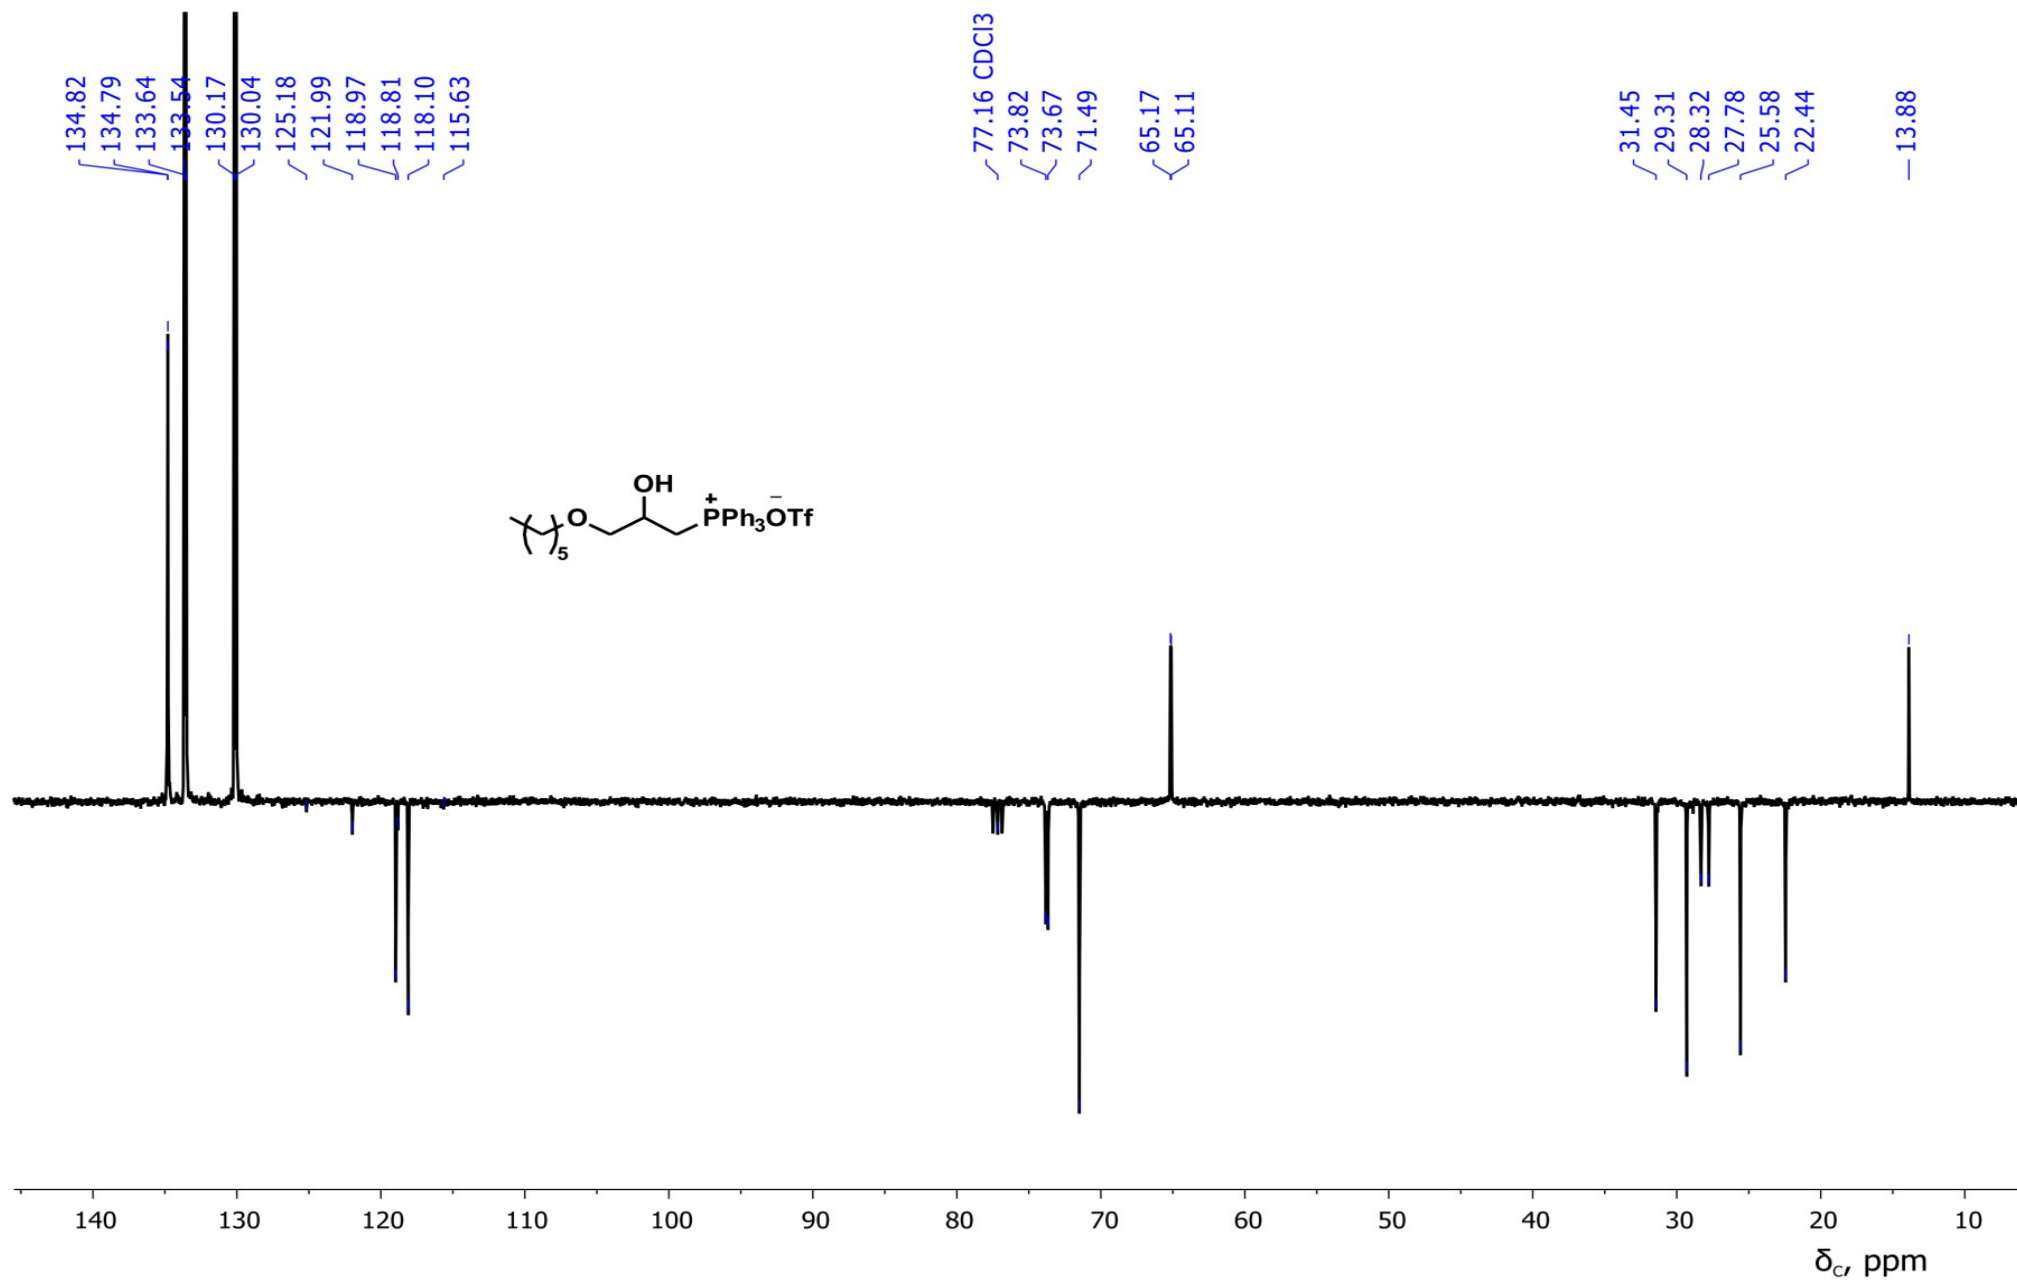

**Figure S64.**  $^{13}\text{C}$ - $\{^1\text{H}\}$  APT NMR spectrum (100.6 MHz,  $\text{CDCl}_3$ ) of compound **3d**.

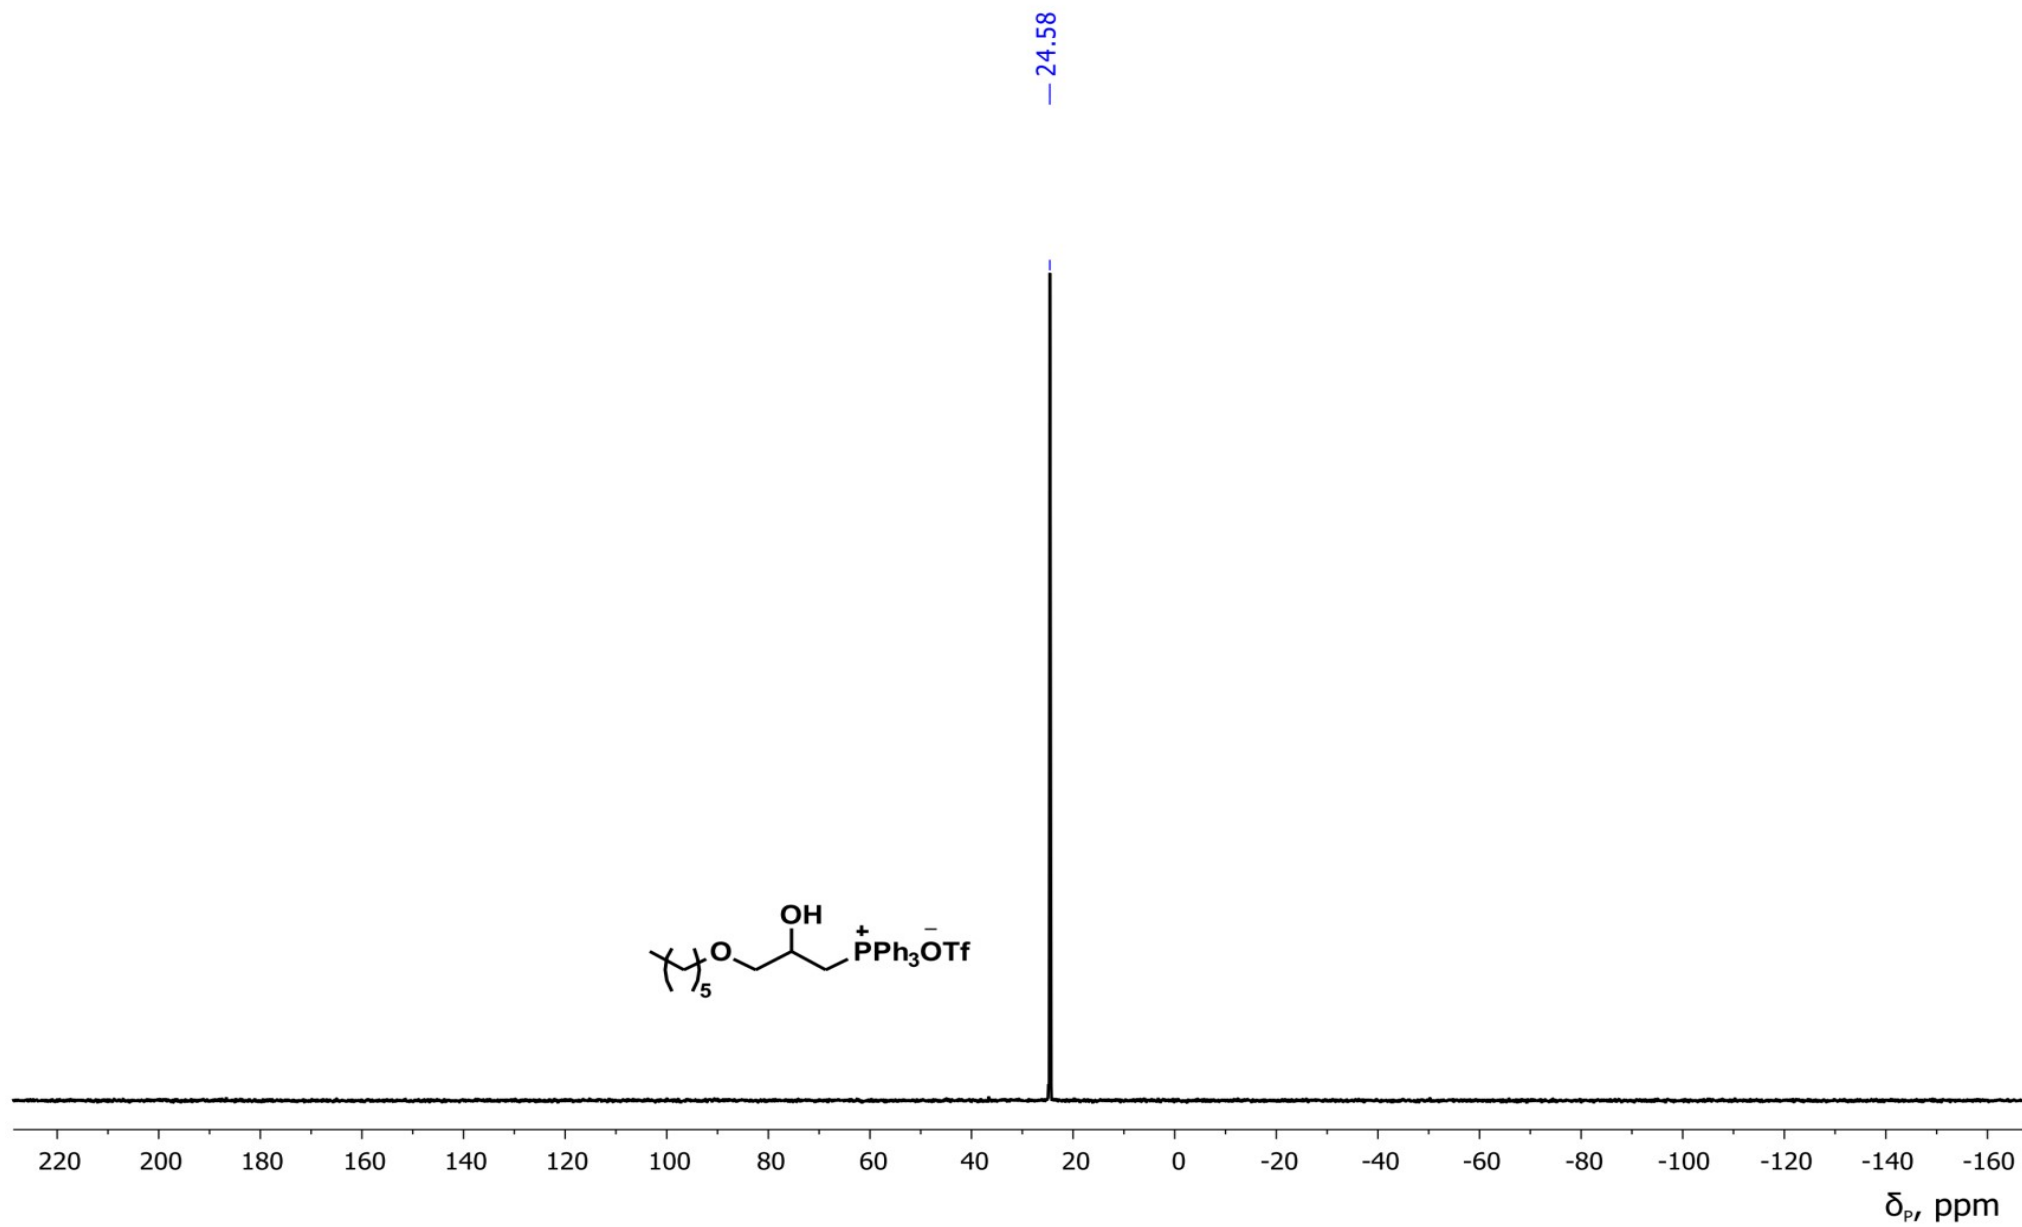

**Figure S65.**  $^{31}\text{P}\{-^1\text{H}\}$  NMR spectrum (162 MHz,  $\text{CDCl}_3$ ) of compound **3d**.

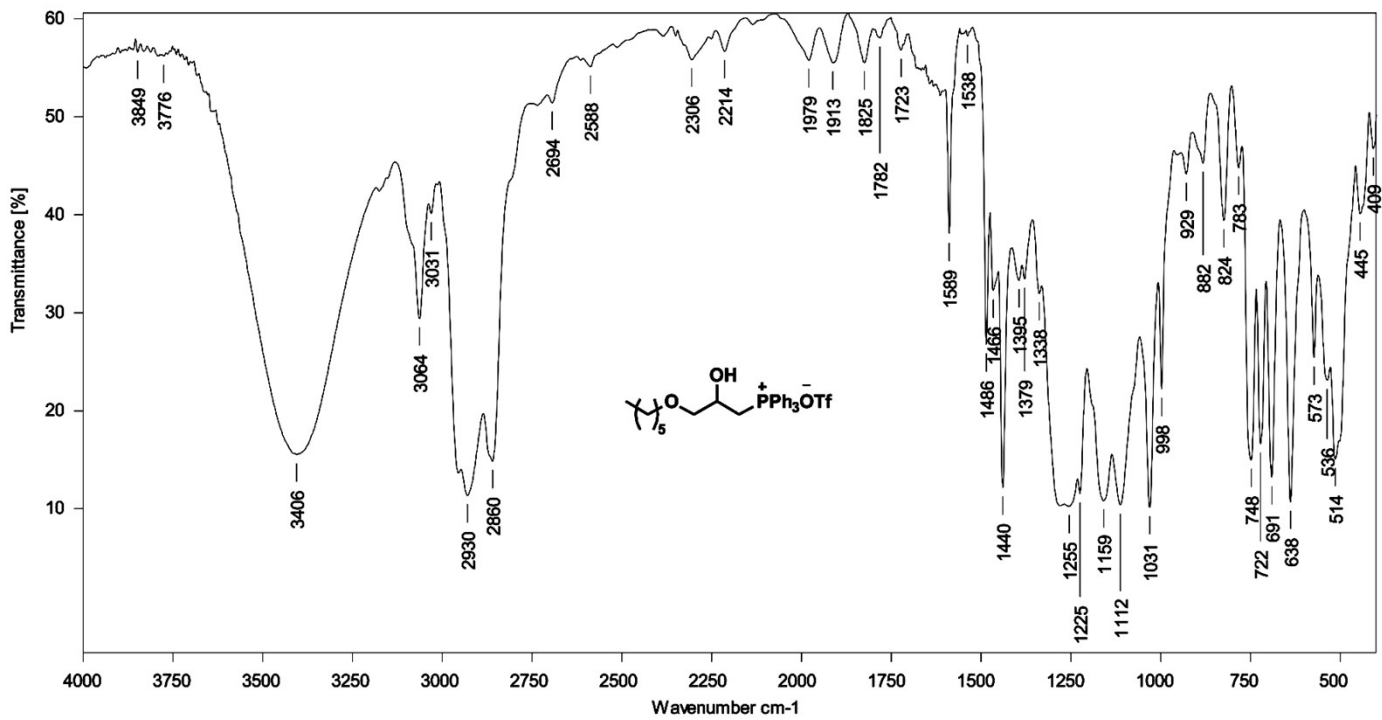

Figure S66. IR spectrum (KBr) of compound **3d**.

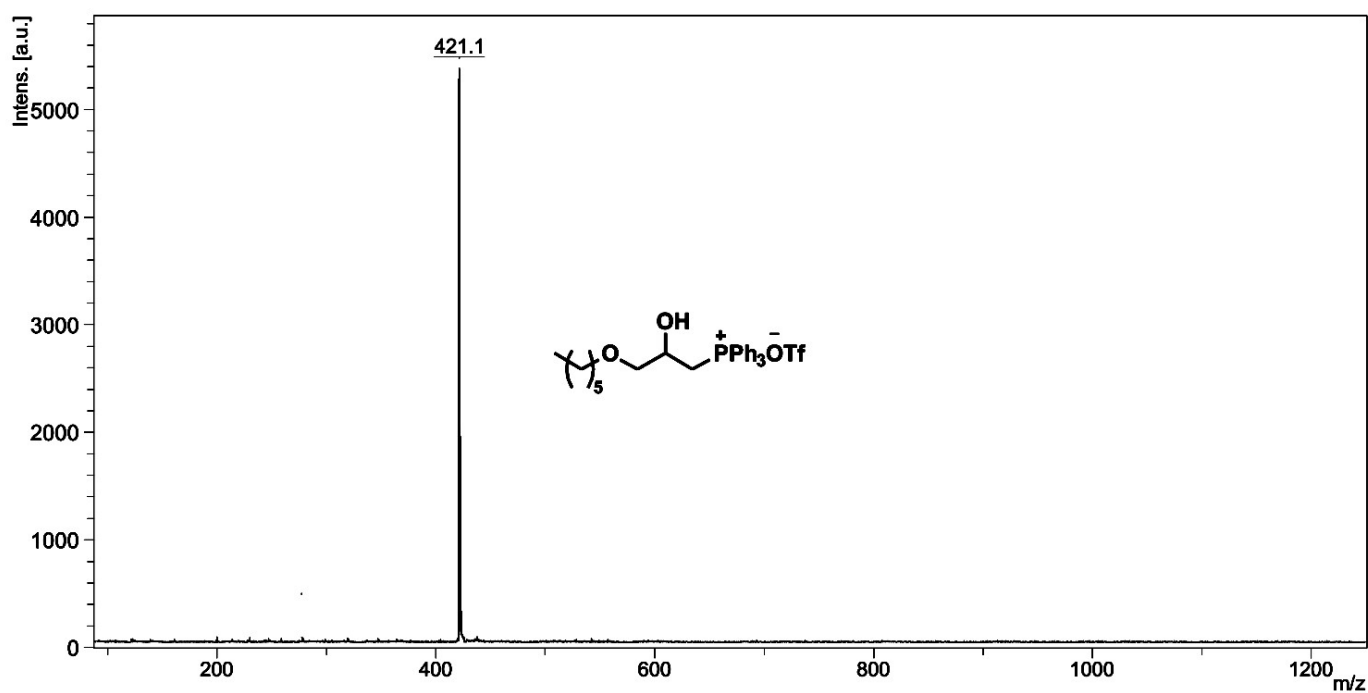

Figure S67. MALDI-MS spectrum of compound **3d**.

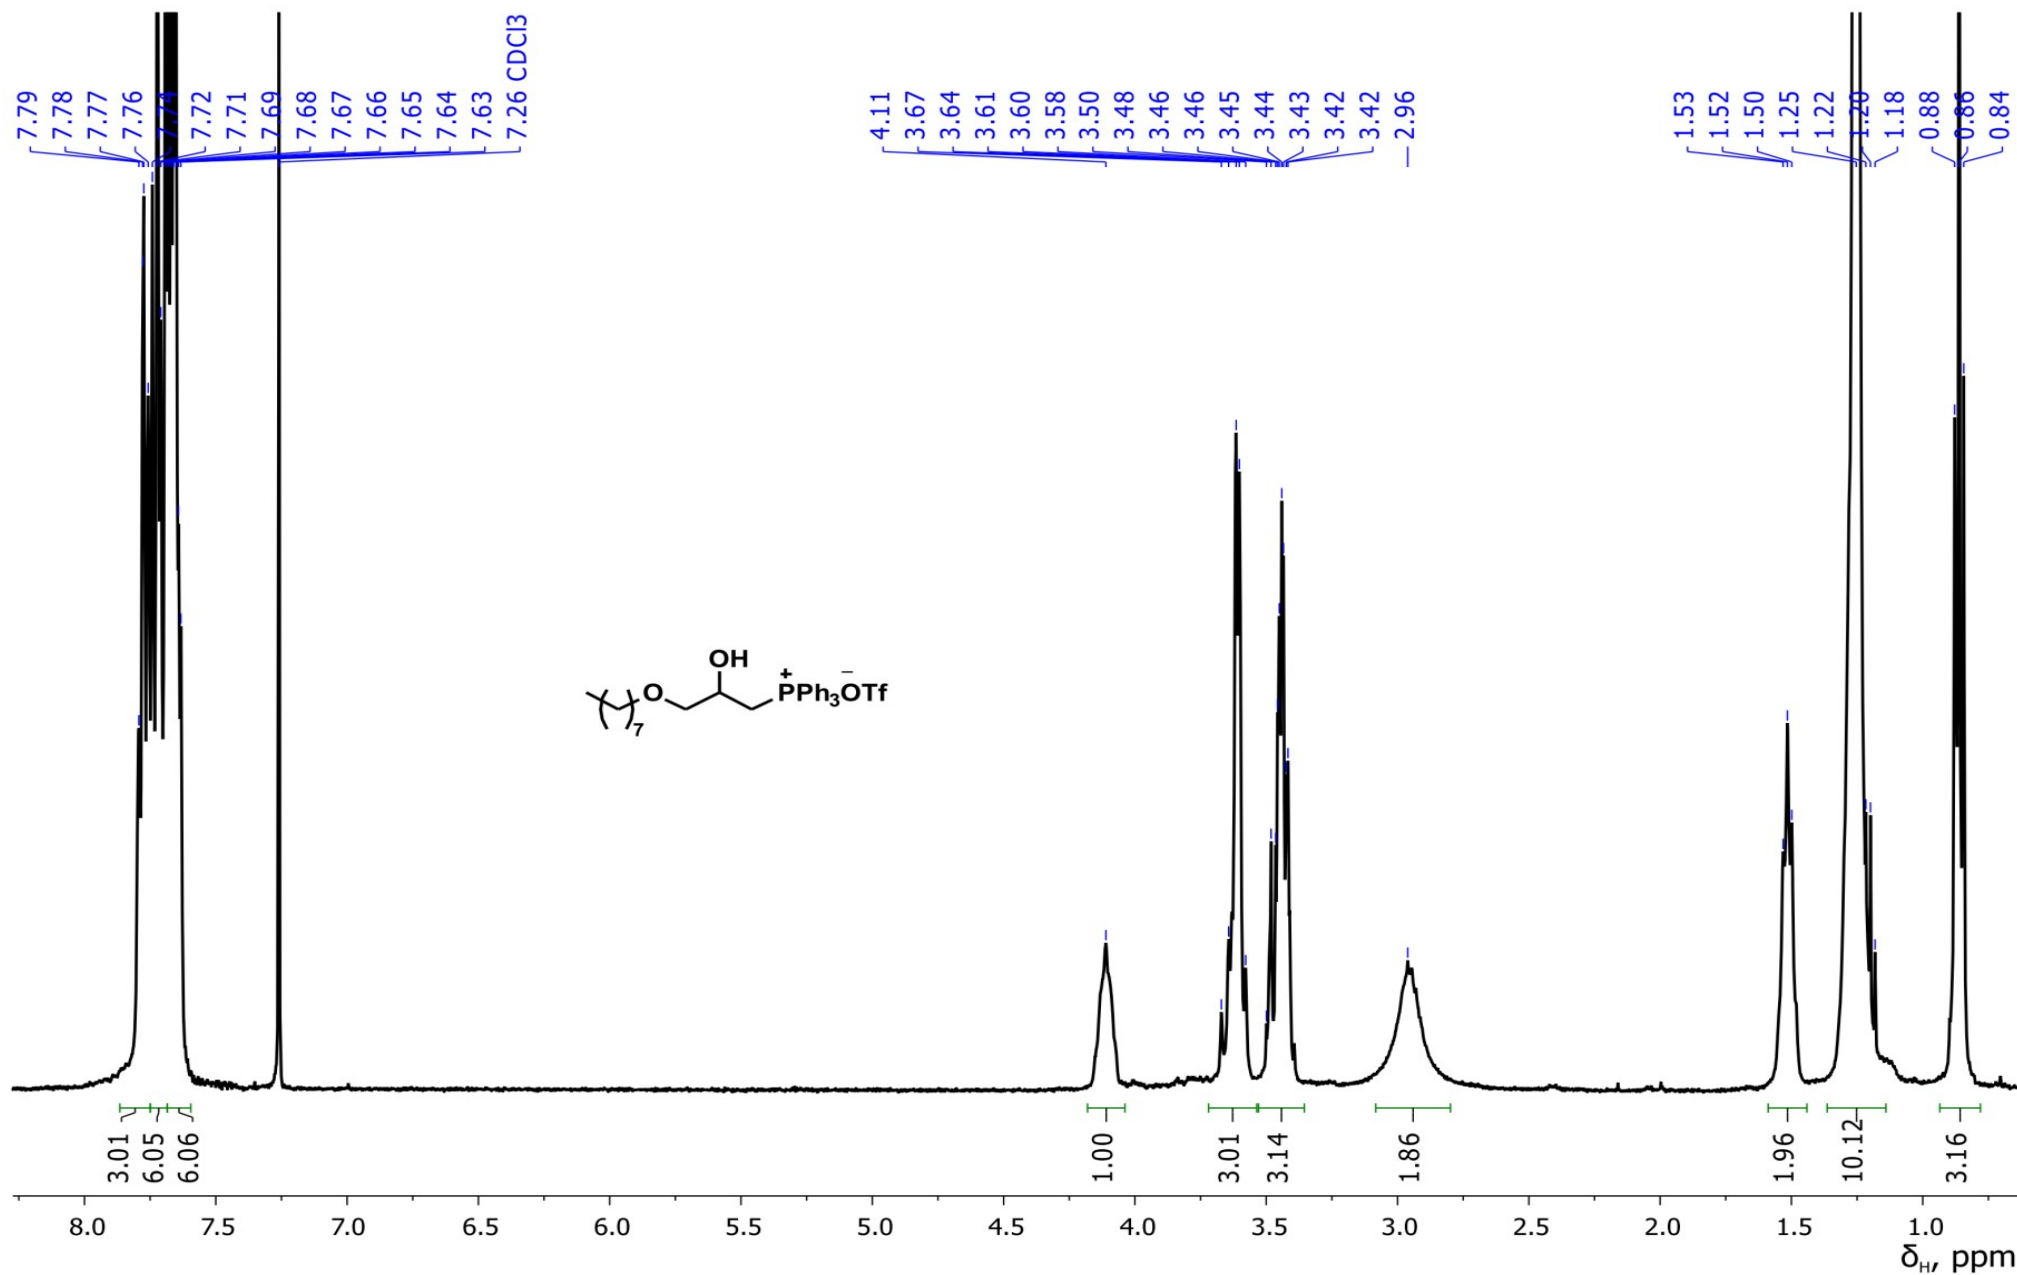

Figure S68.  $^1\text{H}$  NMR spectrum (400 MHz,  $\text{CDCl}_3$ ) of compound 3e.

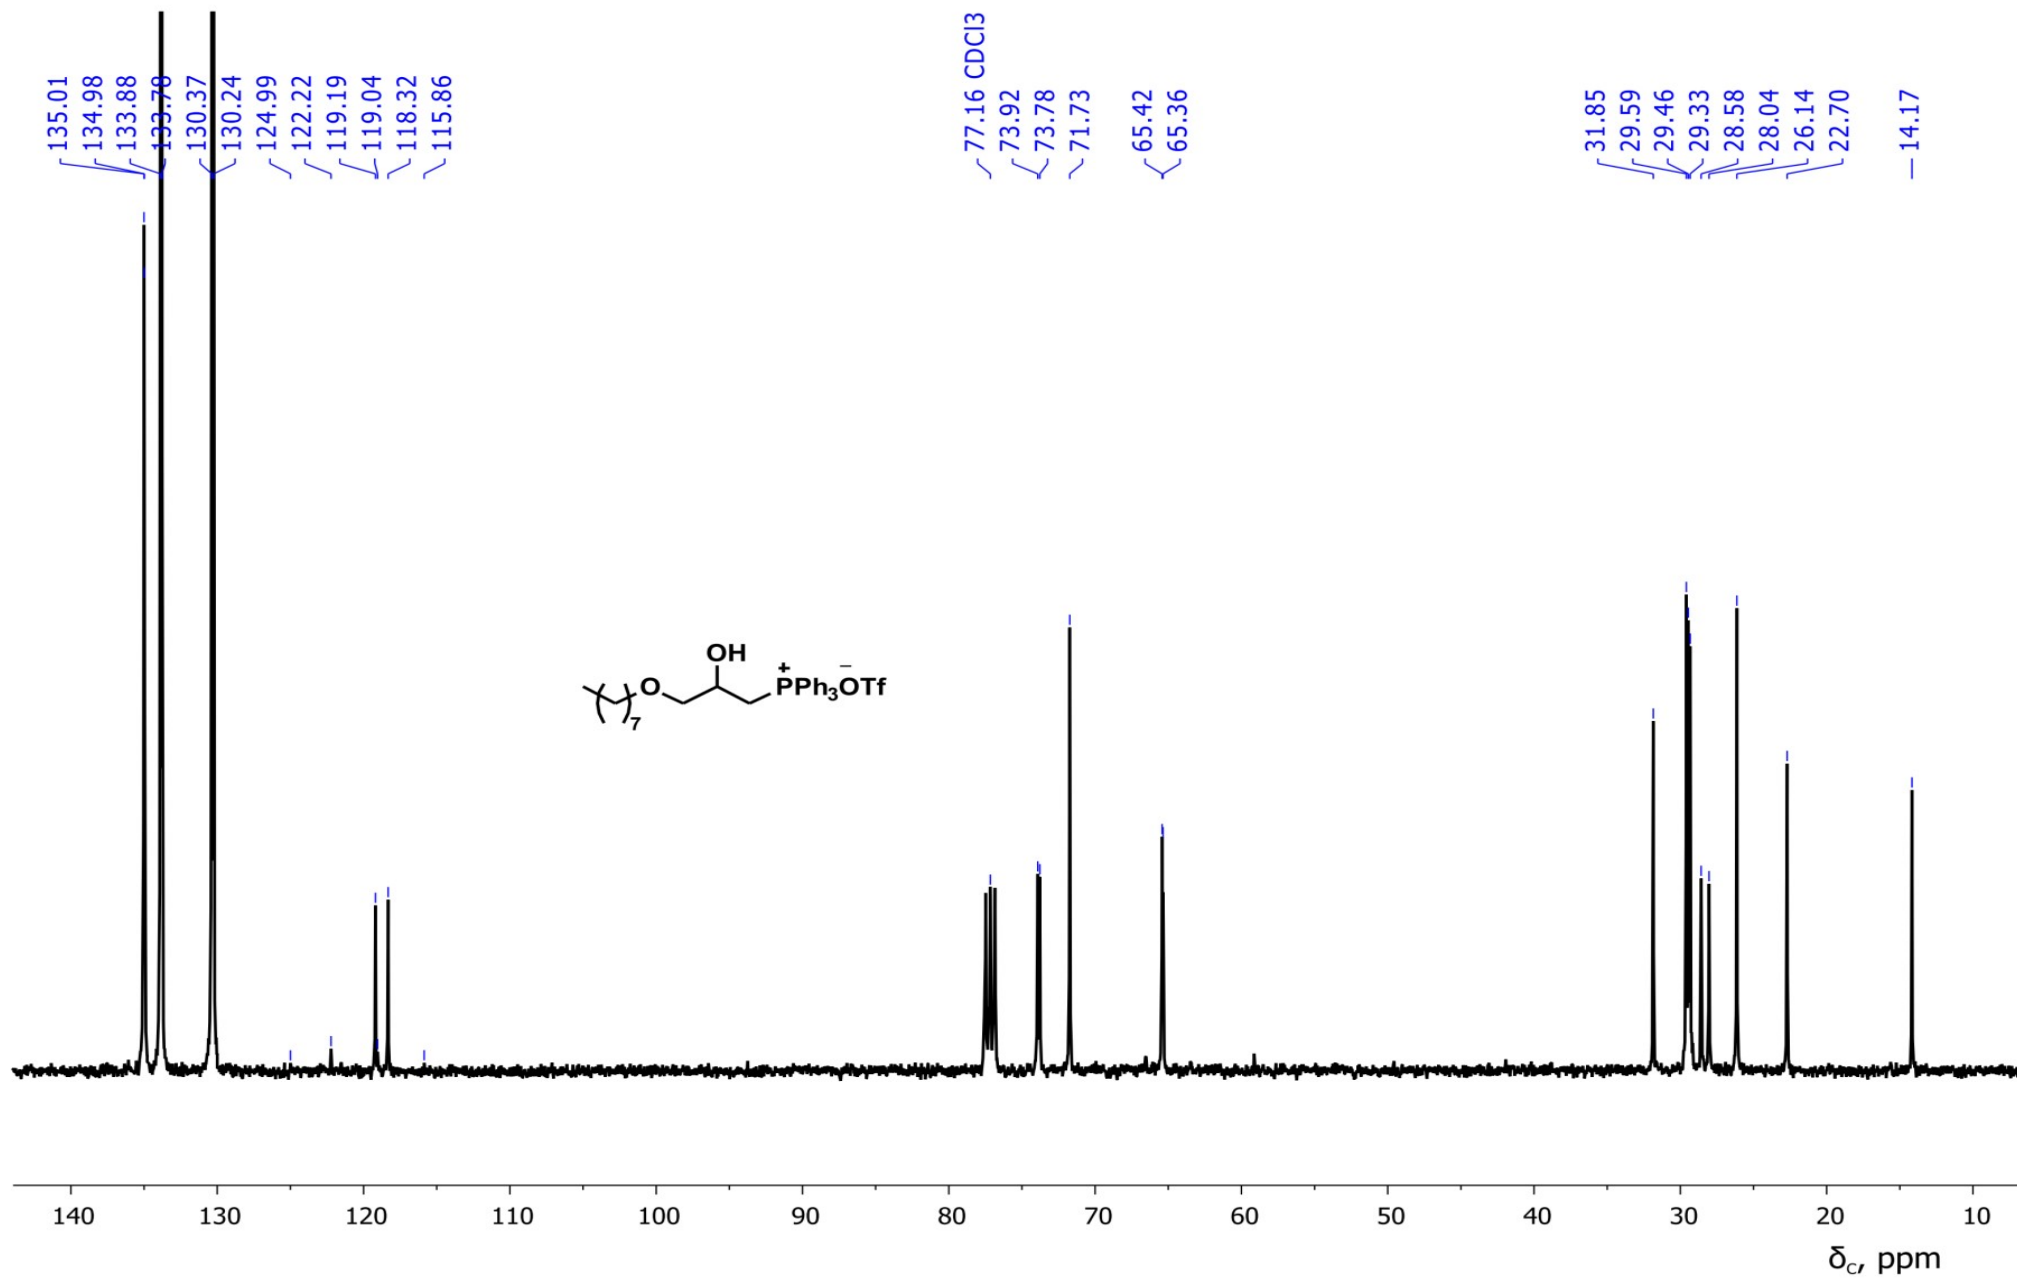

**Figure S69.**  $^{13}\text{C}$ - $\{^1\text{H}\}$  NMR spectrum (100.6 MHz,  $\text{CDCl}_3$ ) of compound **3e**.

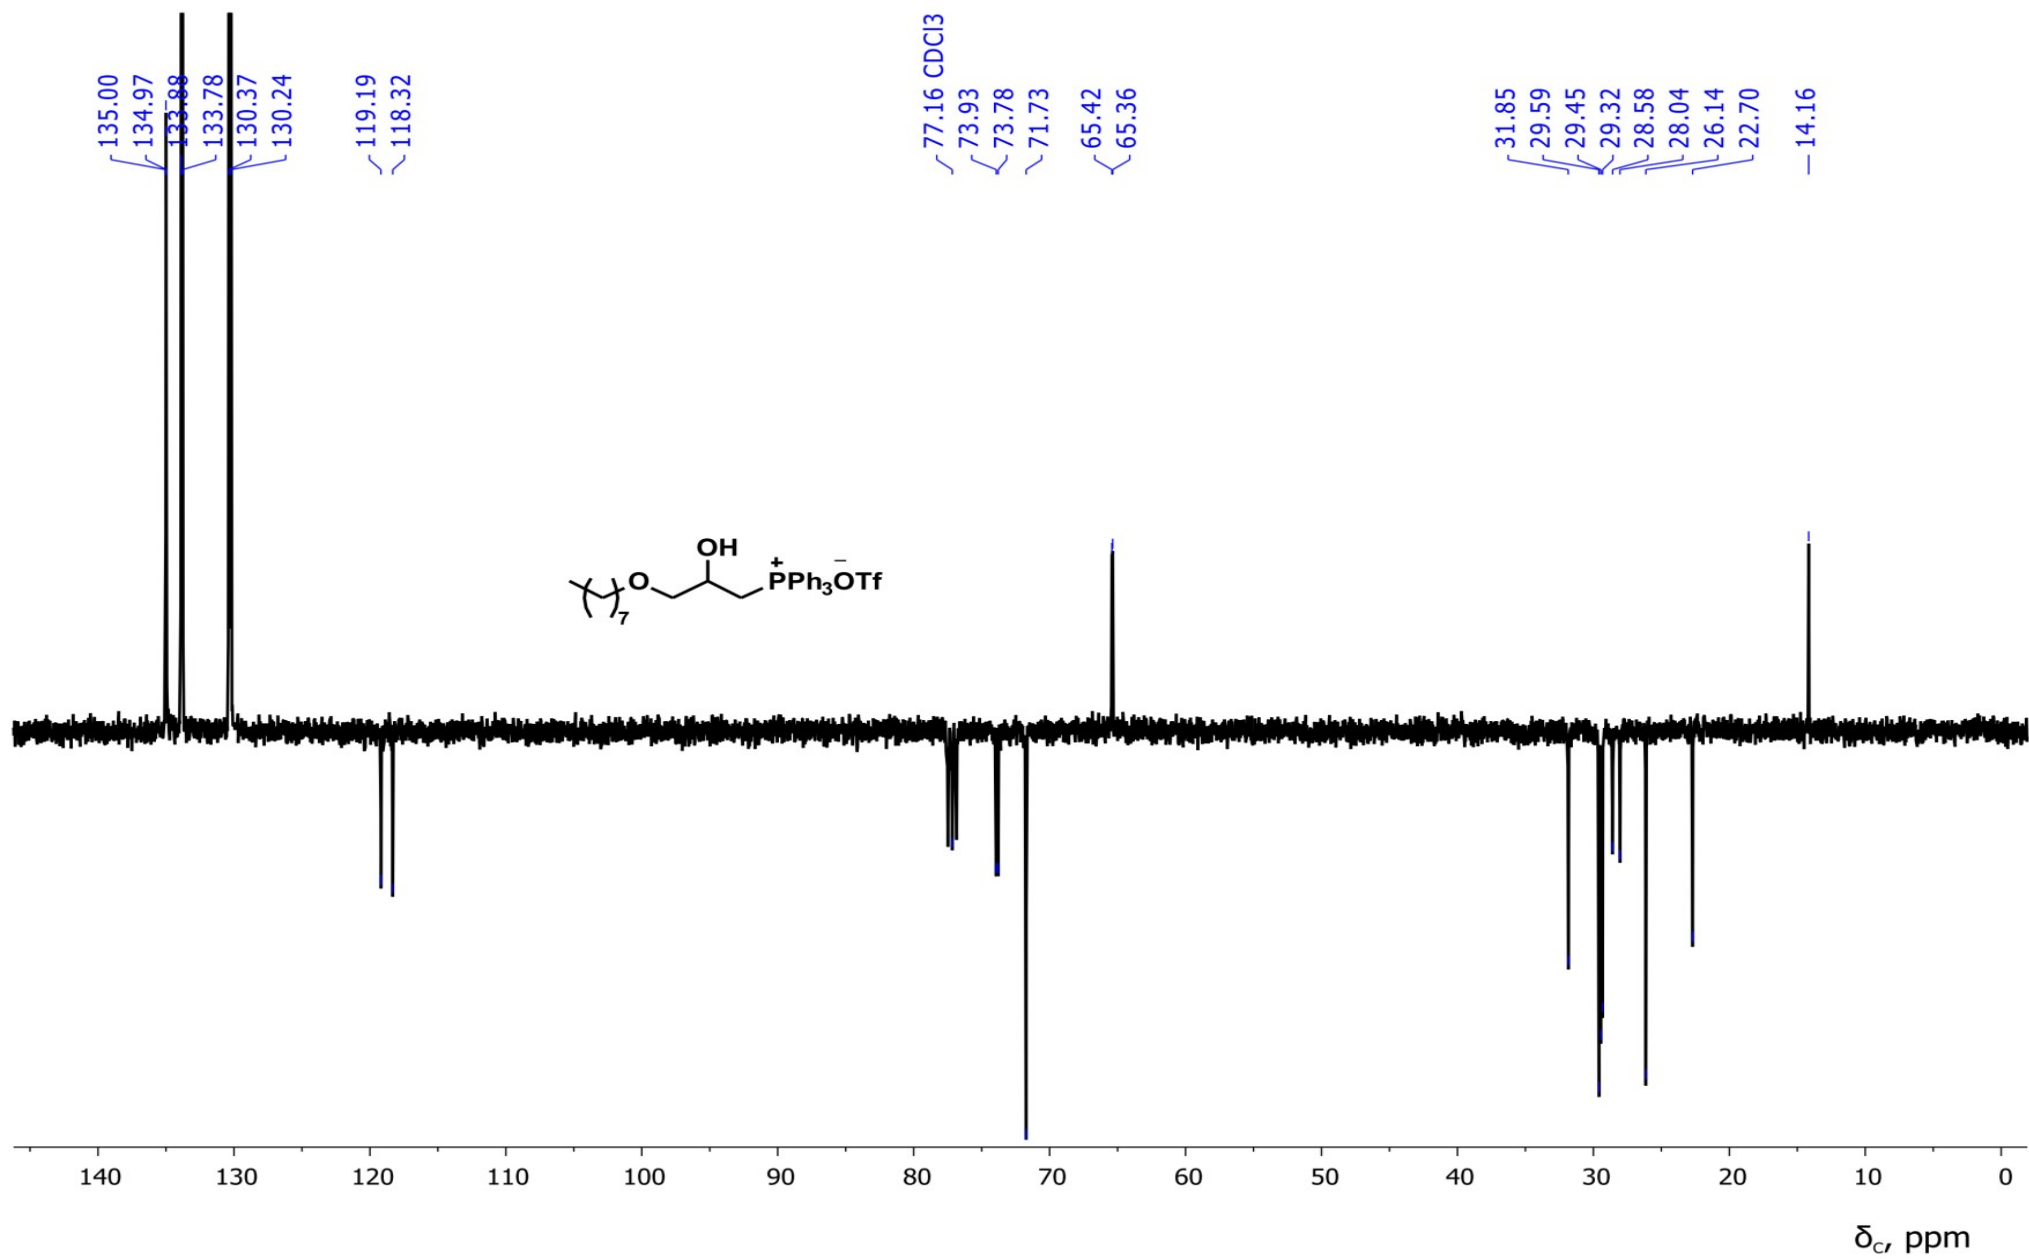

**Figure S70.**  $^{13}\text{C}$ - $\{^1\text{H}\}$  APT NMR spectrum (100.6 MHz,  $\text{CDCl}_3$ ) of compound **3e**.

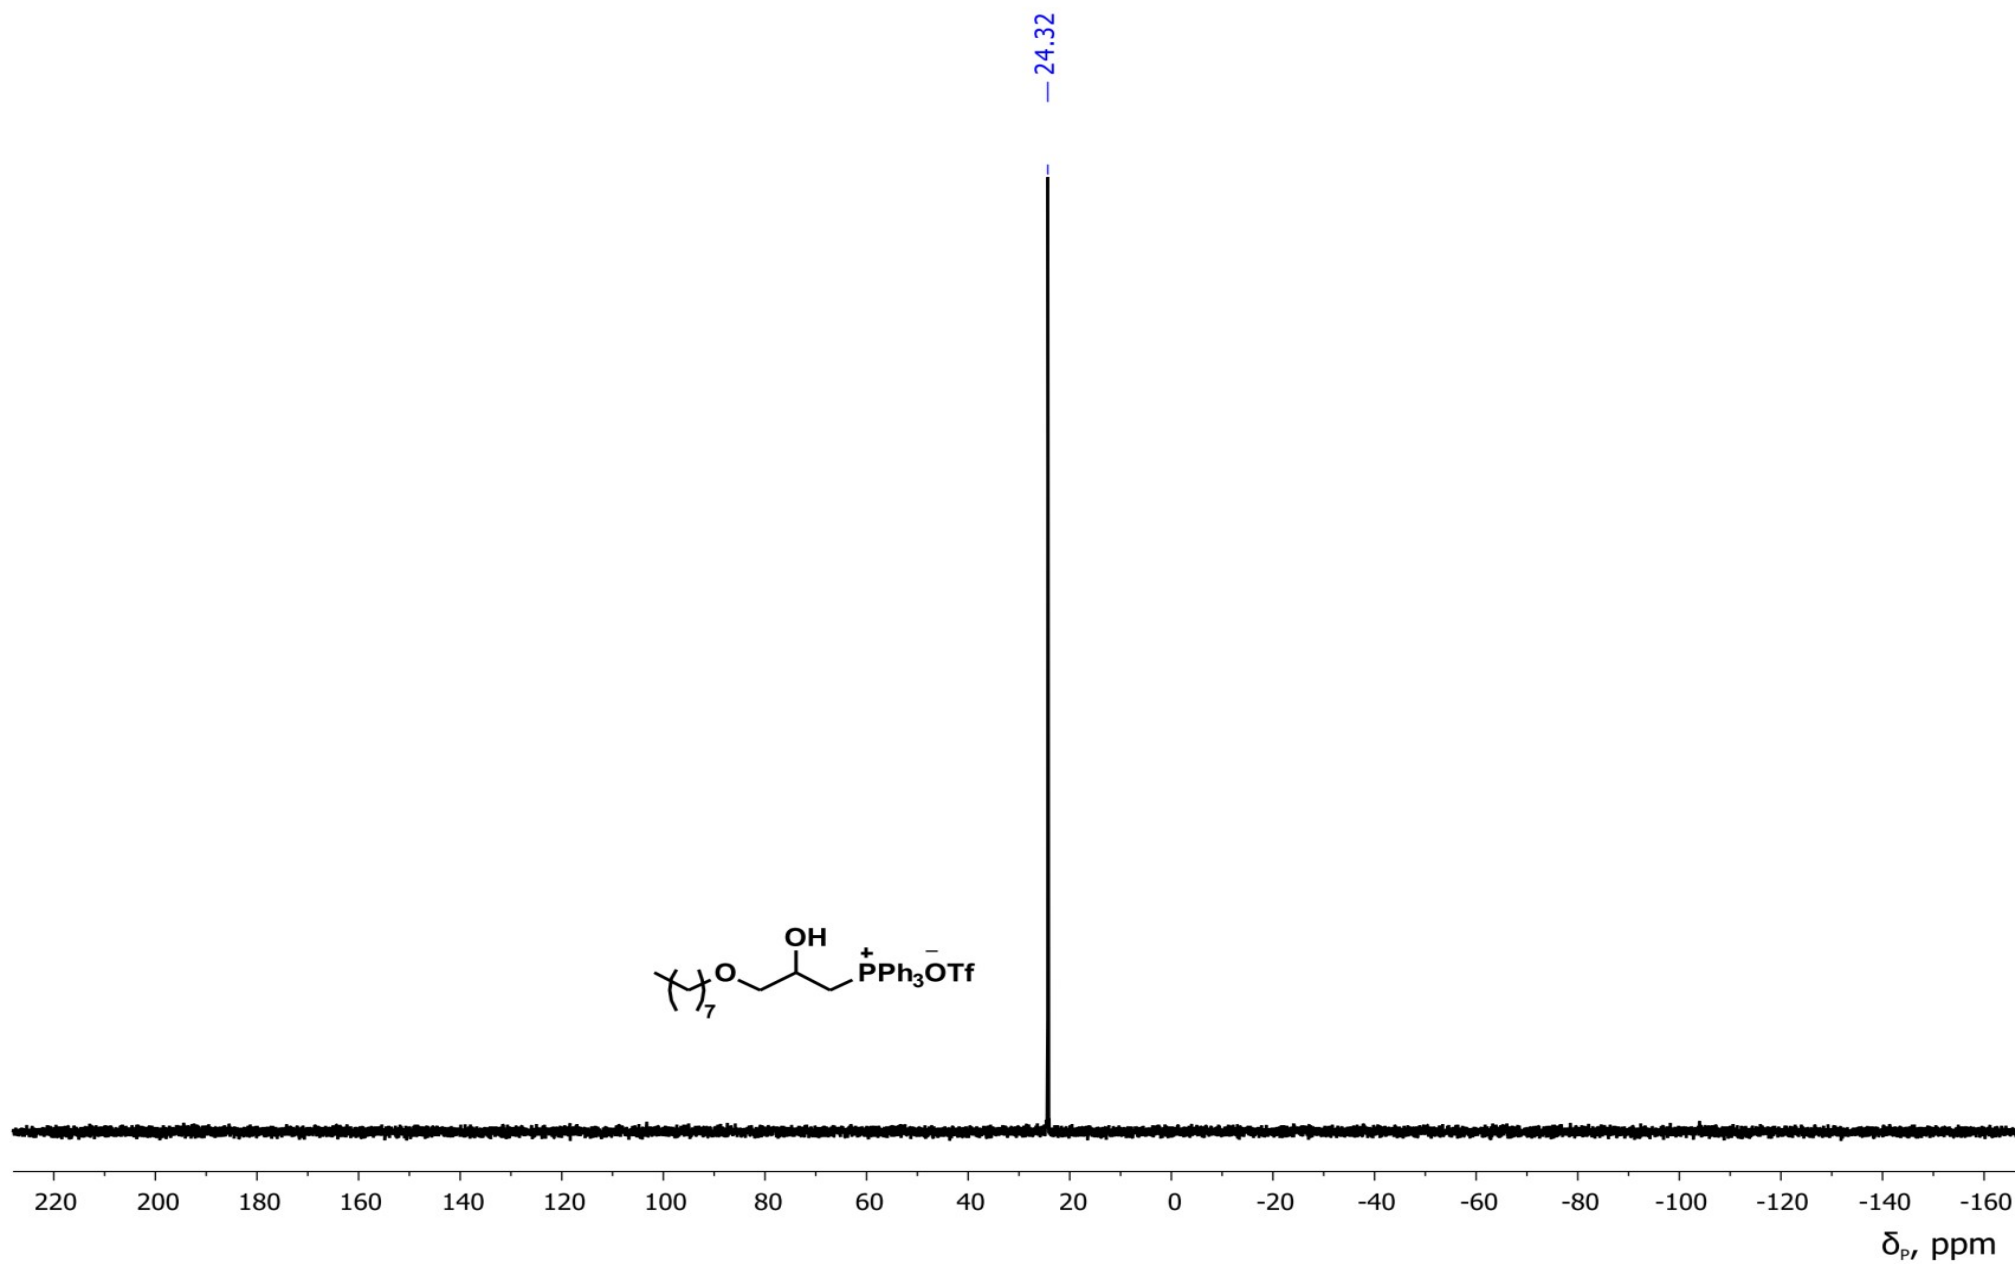

Figure S71.  $^{31}\text{P}\{-^1\text{H}\}$  NMR spectrum (162 MHz,  $\text{CDCl}_3$ ) of compound **3e**.

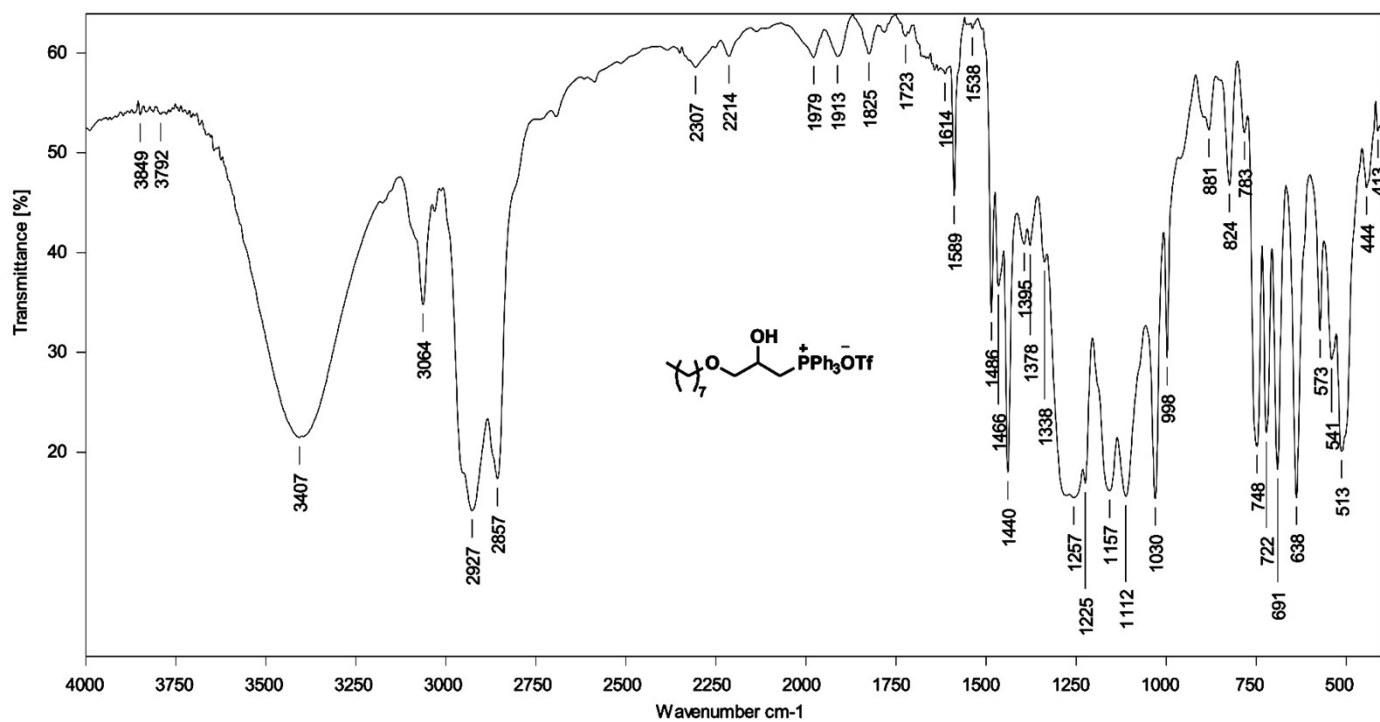

Figure S72. IR spectrum (KBr) of compound **3e**.

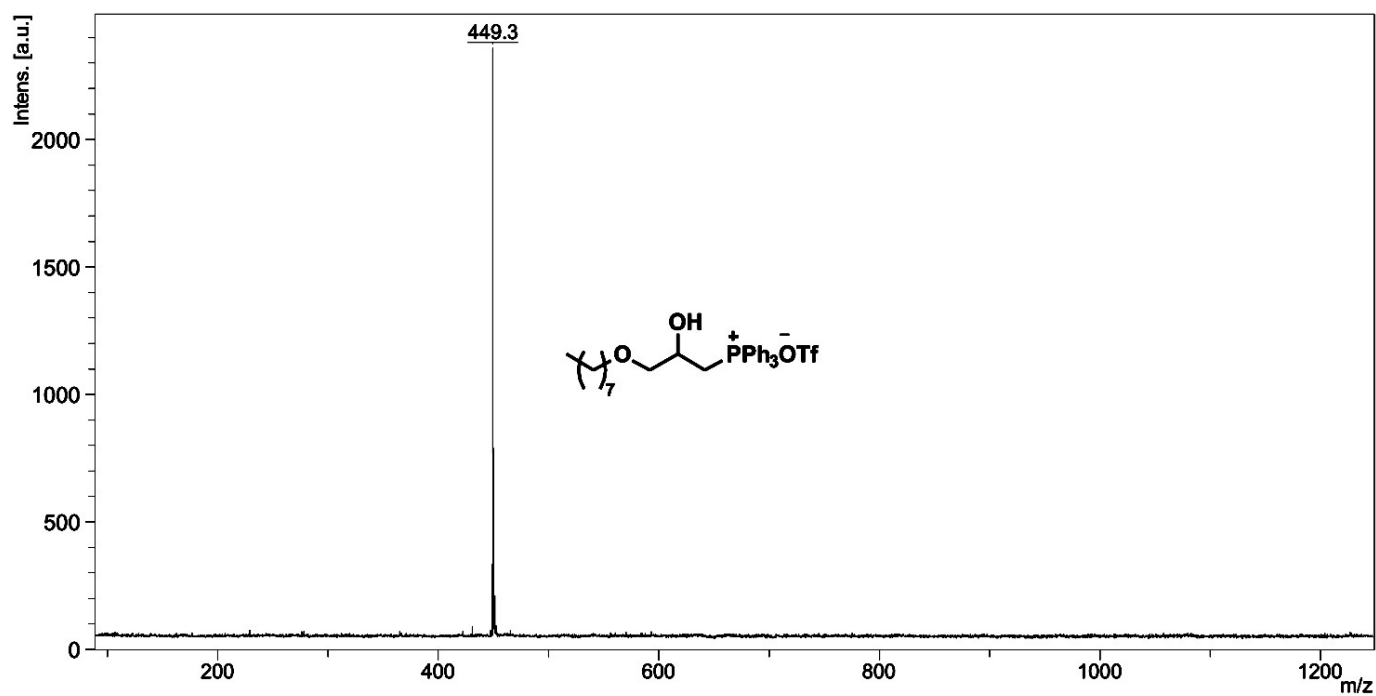

Figure S73. MALDI-MS spectrum of compound **3e**.

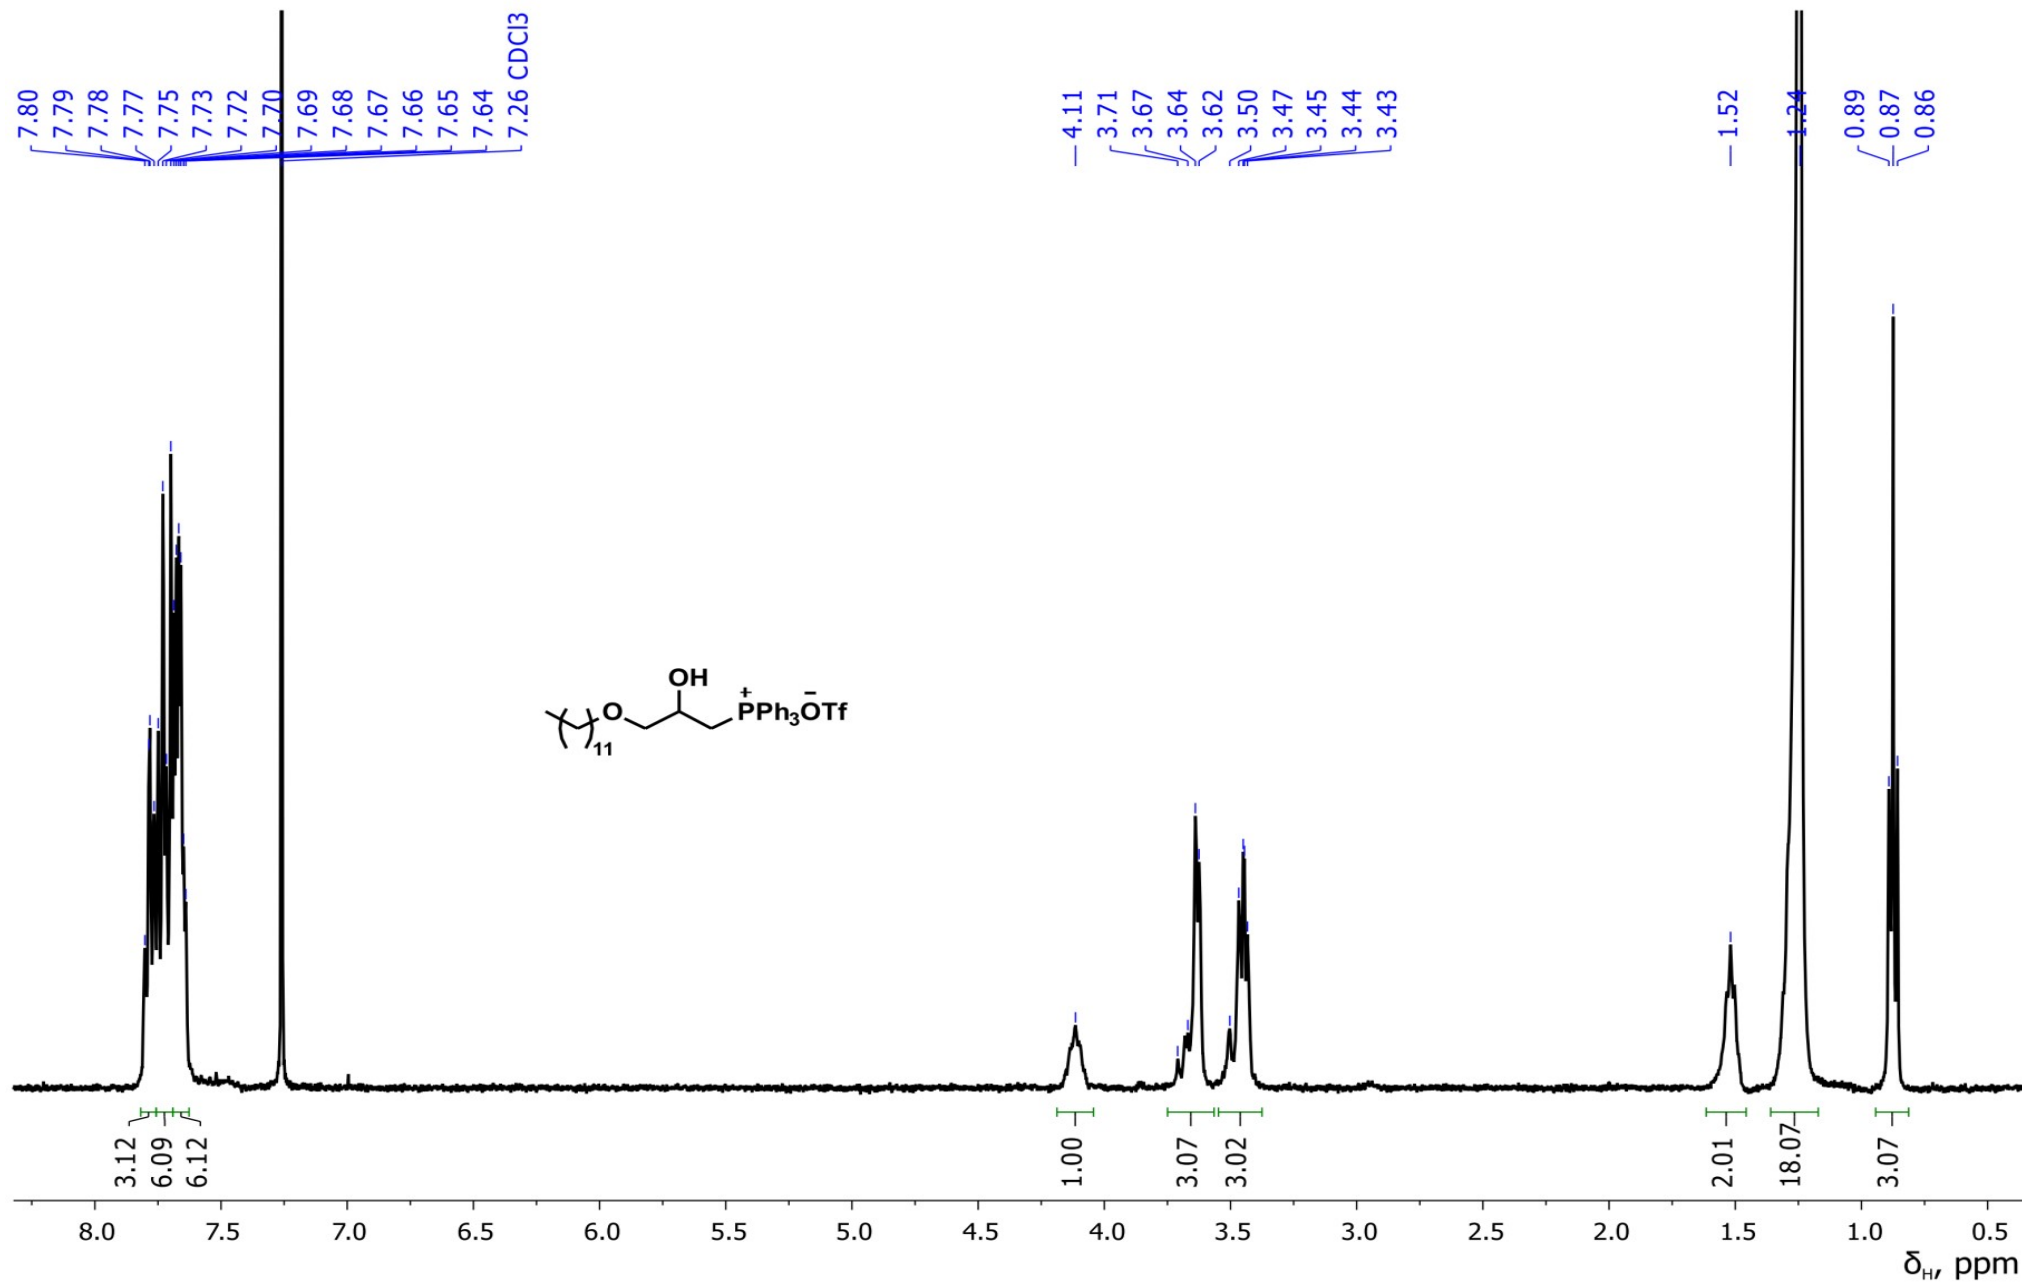

Figure S74.  $^1\text{H}$  NMR spectrum (400 MHz,  $\text{CDCl}_3$ ) of compound **3g**.

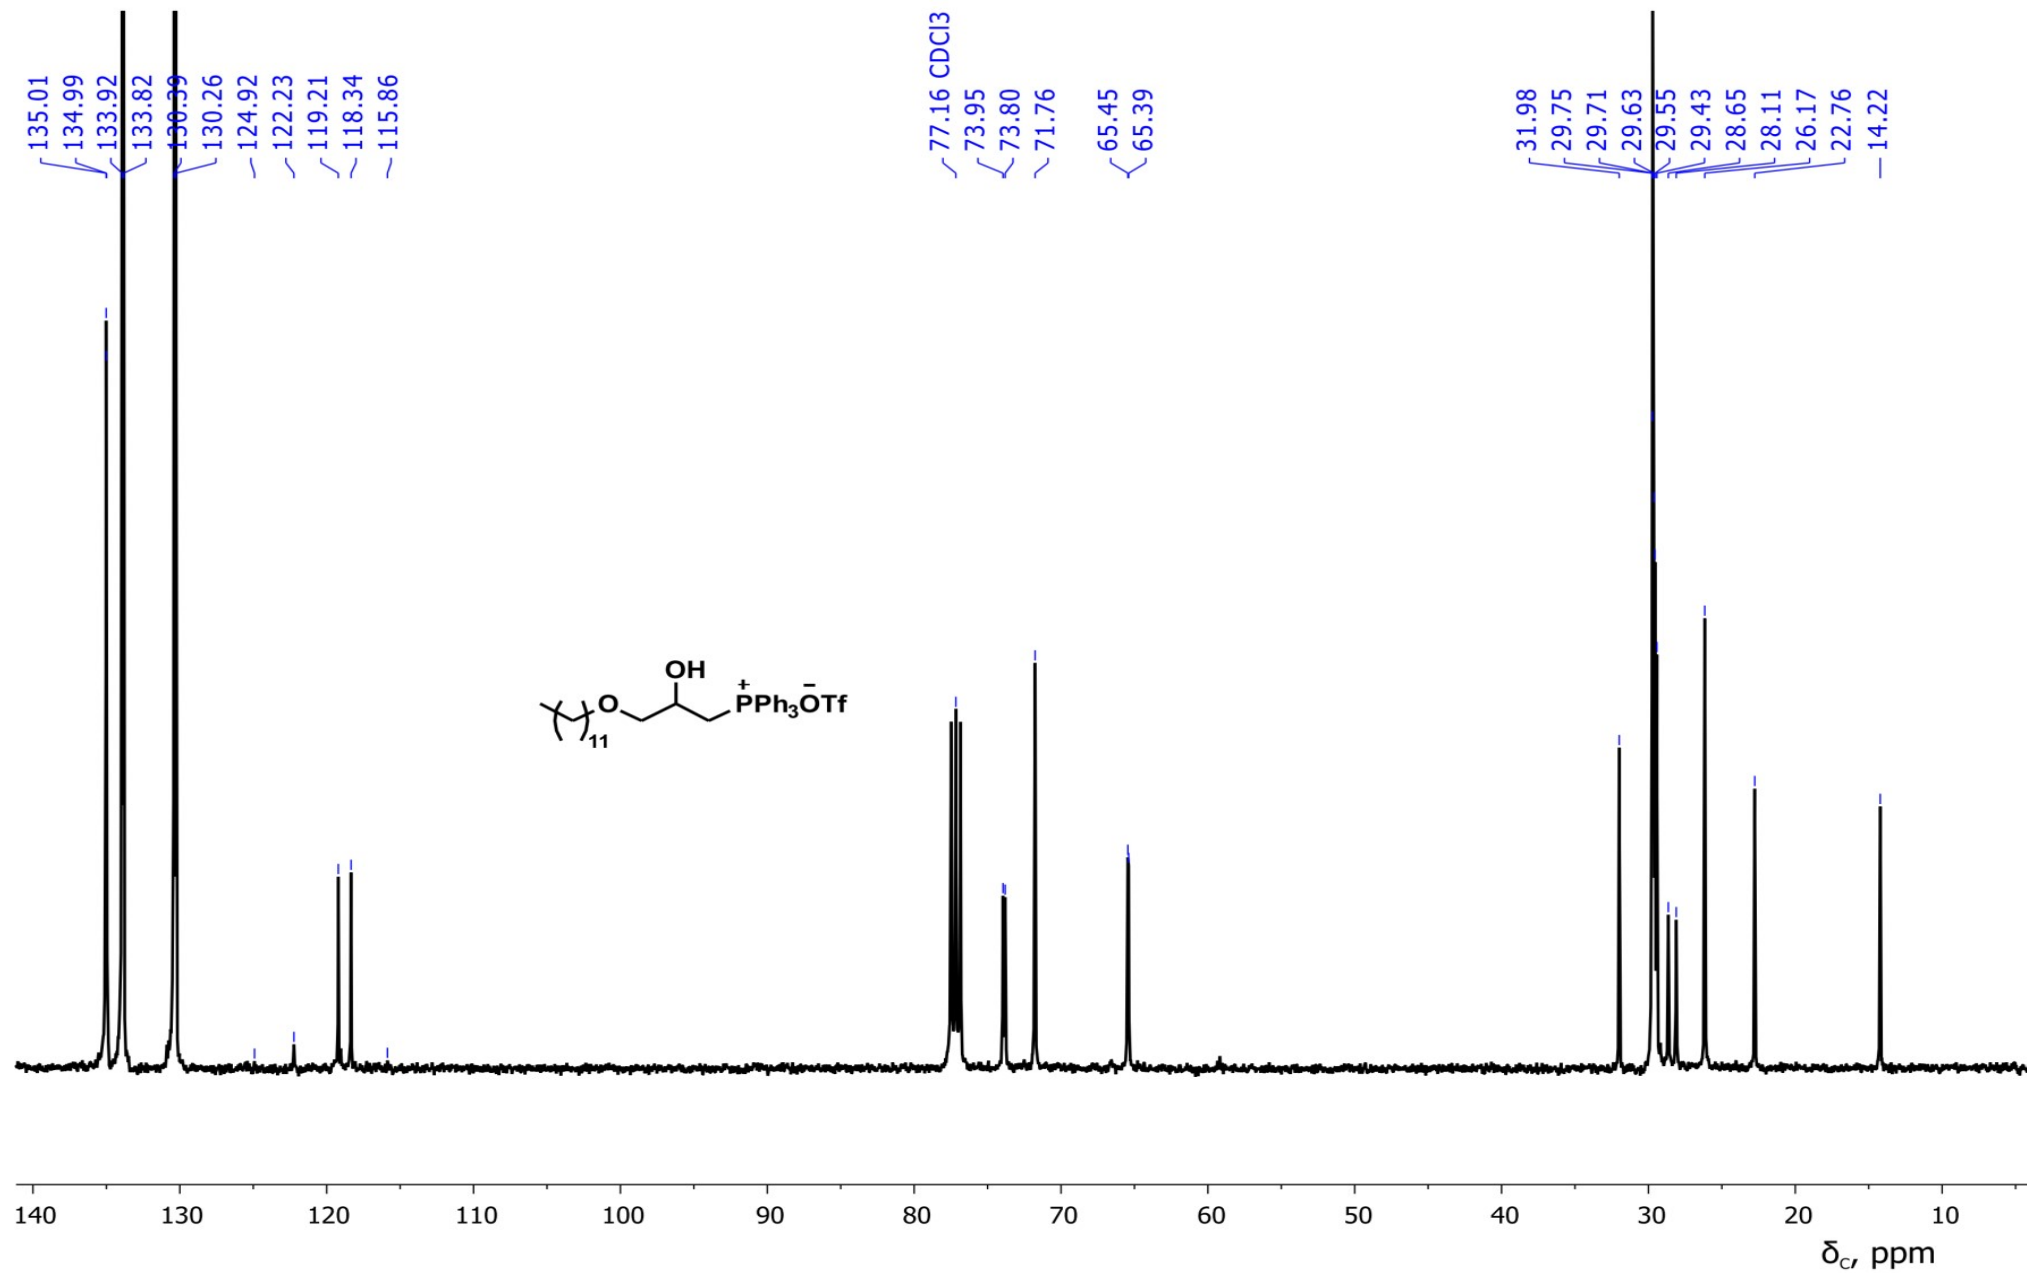

Figure S75.  $^{13}\text{C}$ - $\{^1\text{H}\}$  NMR spectrum (100.6 MHz,  $\text{CDCl}_3$ ) of compound **3g**.

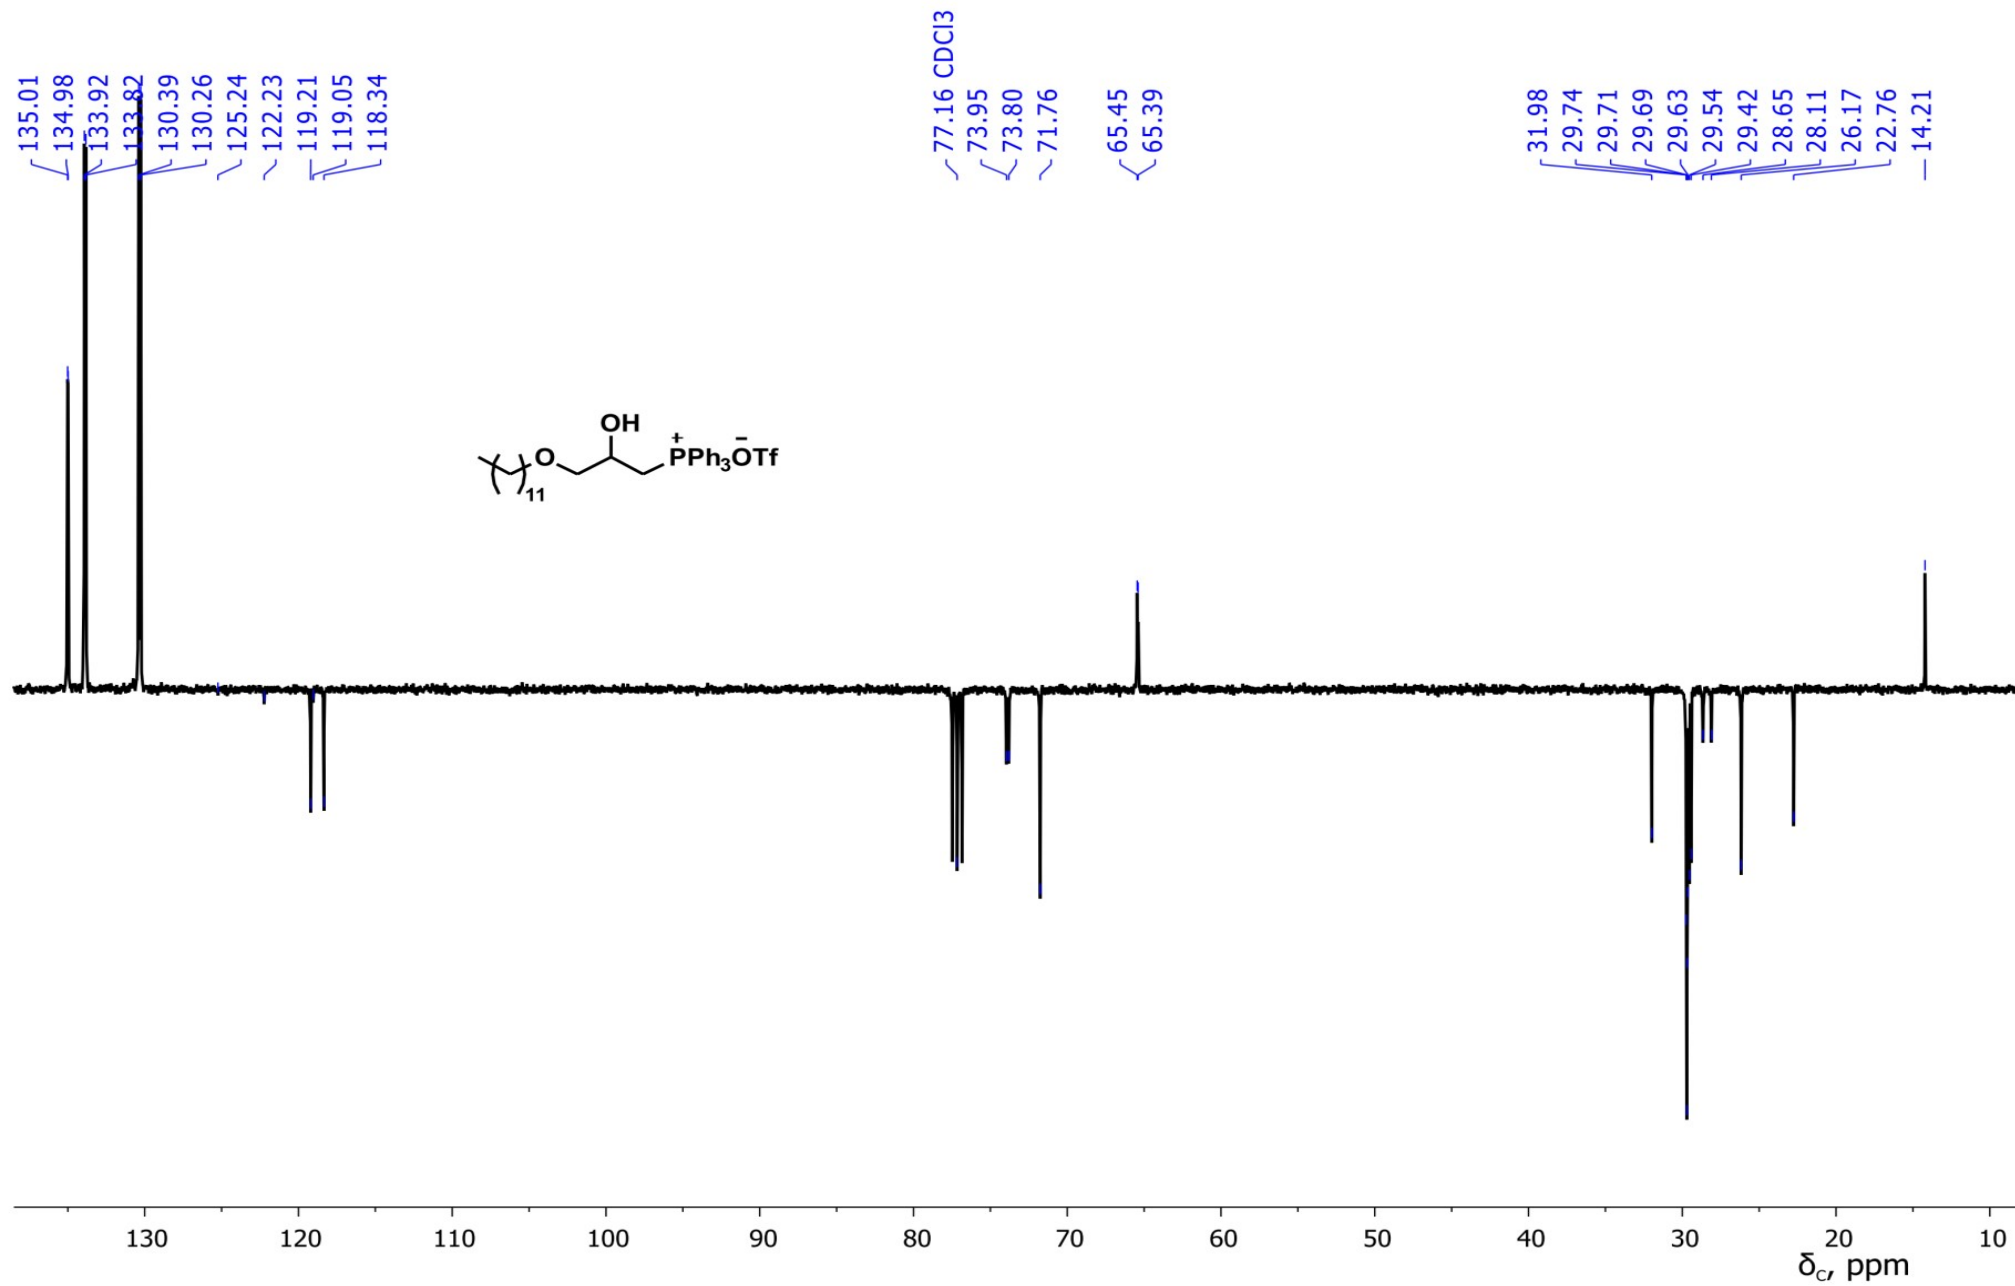

**Figure S76.**  $^{13}\text{C}$ - $\{^1\text{H}\}$  APT NMR spectrum (100.6 MHz,  $\text{CDCl}_3$ ) of compound **3g**.

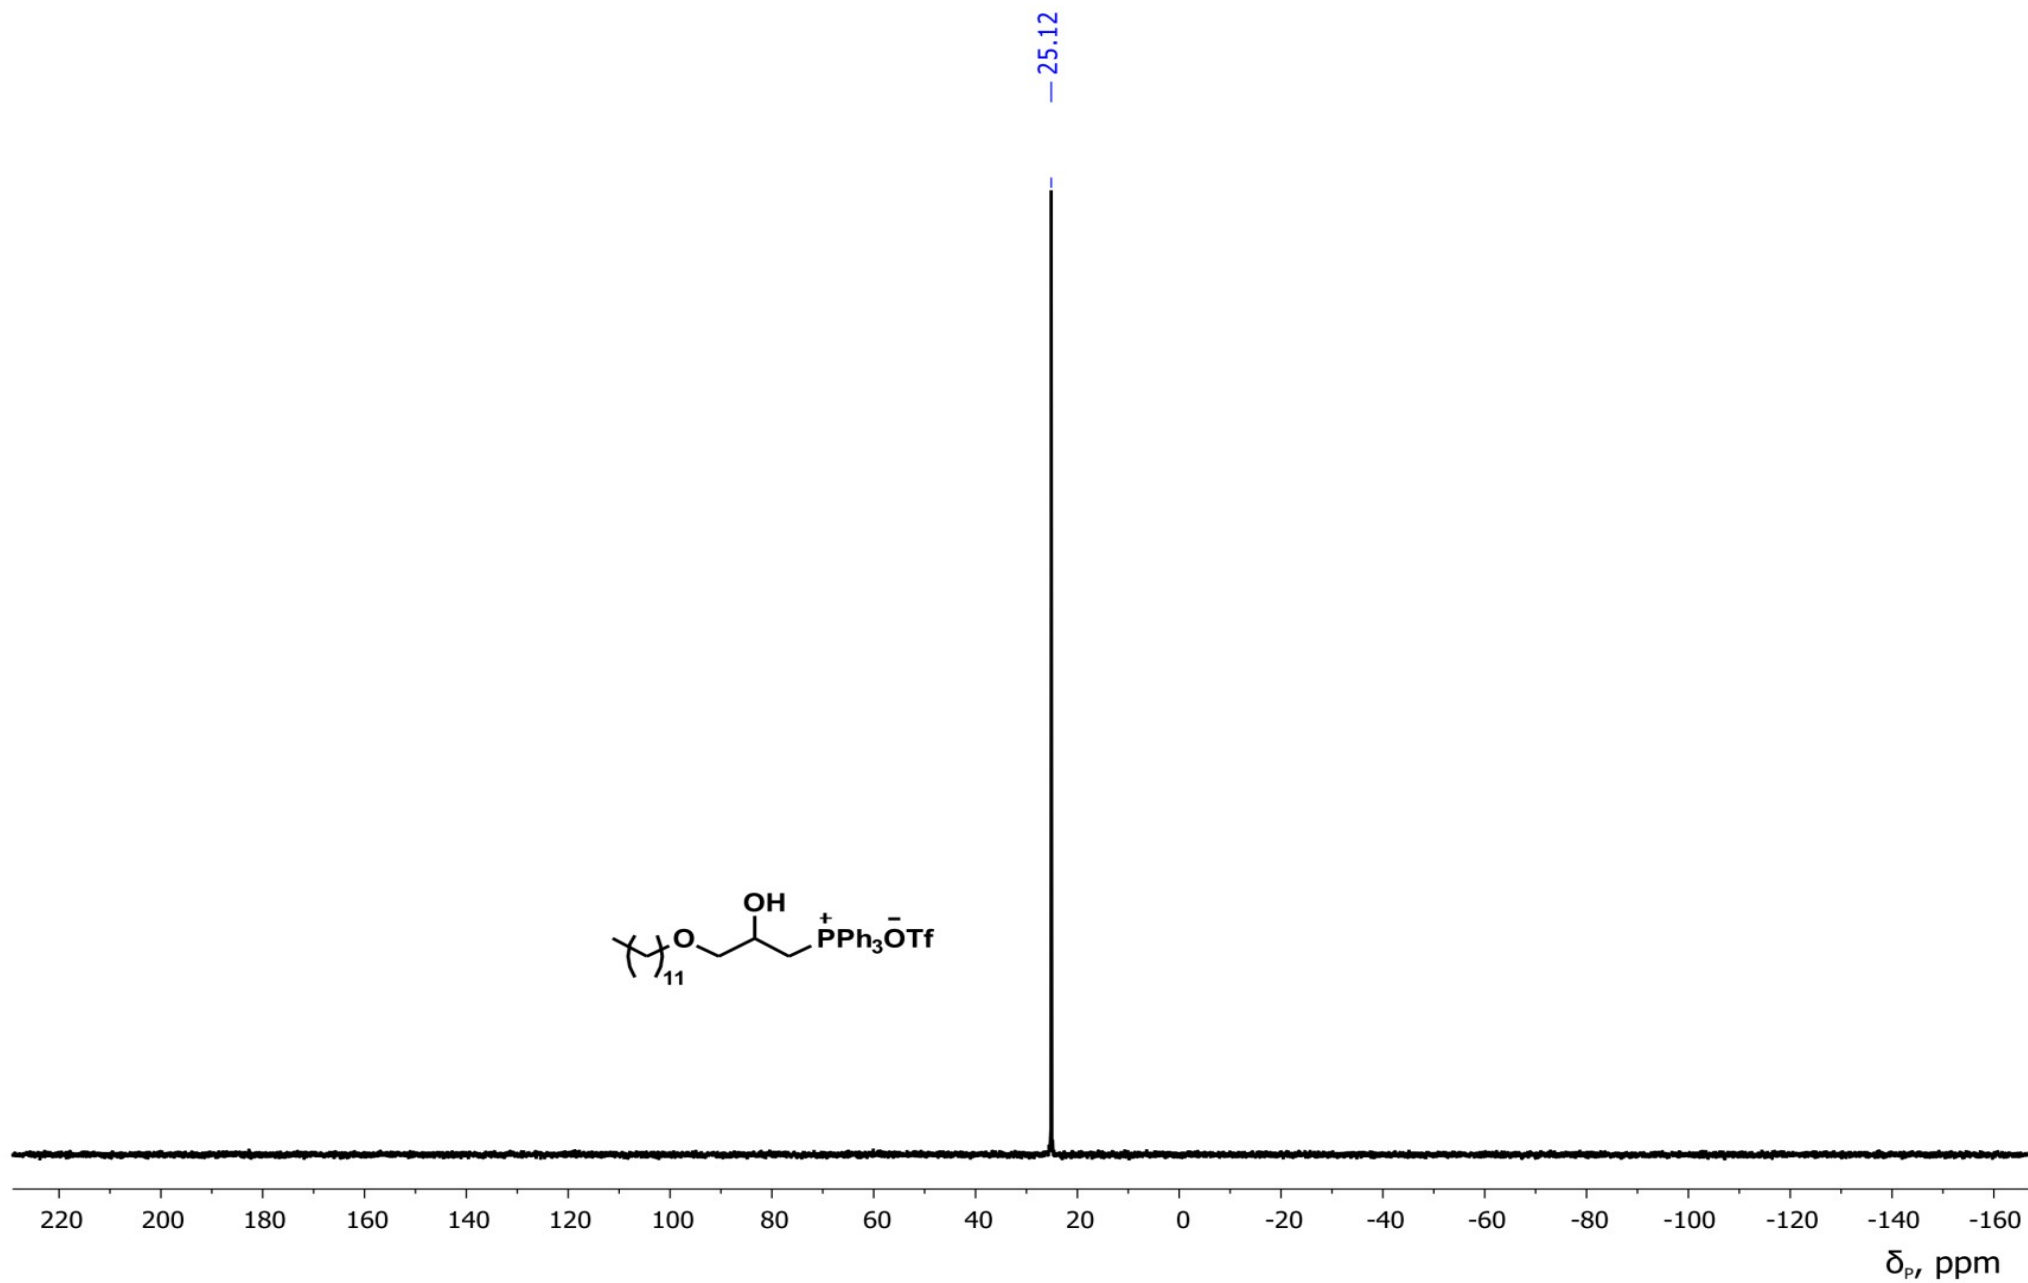

Figure S77.  $^{31}\text{P}\{-^1\text{H}\}$  NMR spectrum (162 MHz,  $\text{CDCl}_3$ ) of compound **3g**.

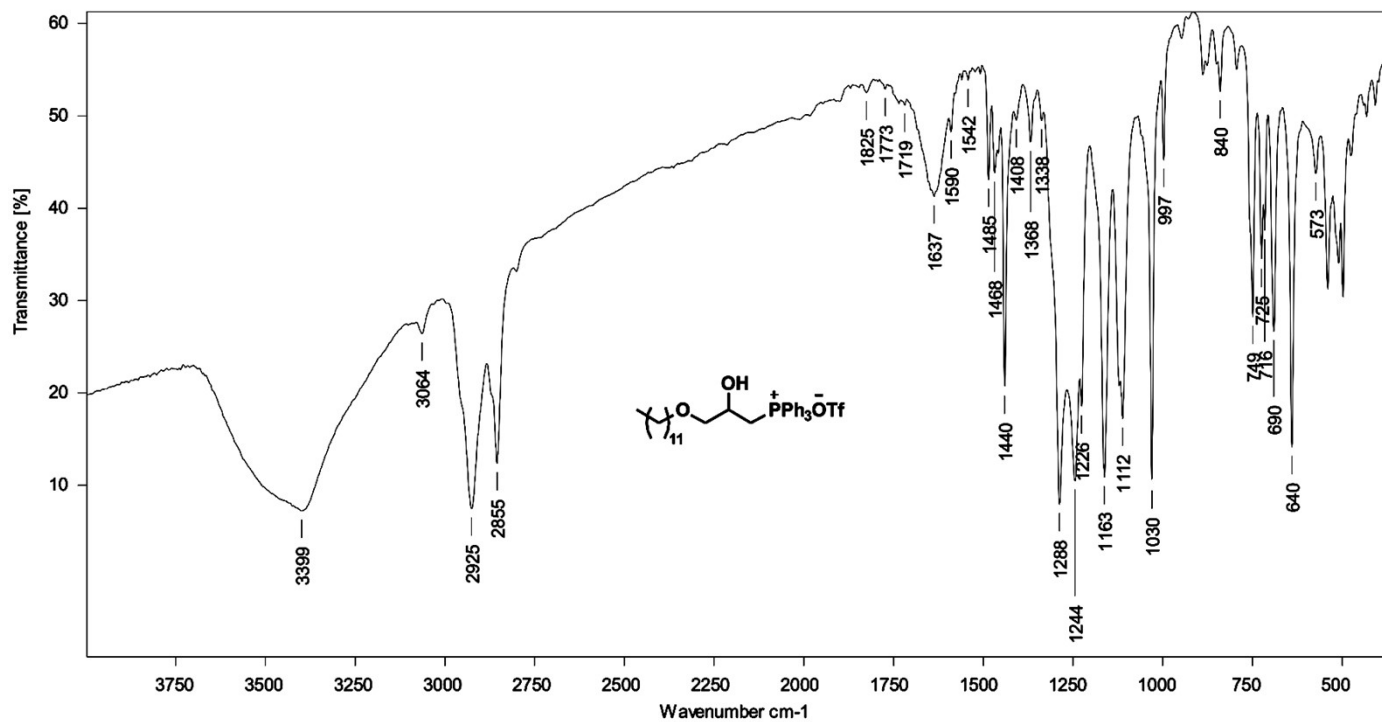

Figure S78. IR spectrum (KBr) of compound 3g.

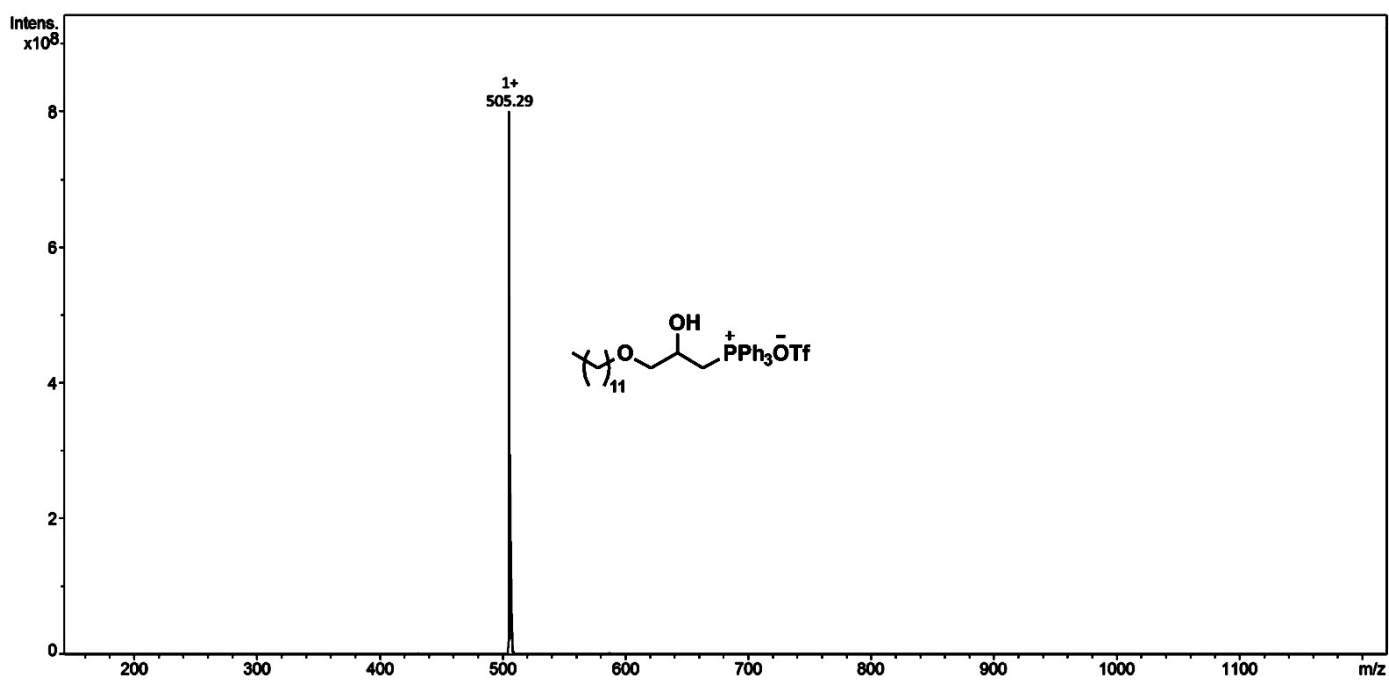

Figure S79. ESI-MS spectrum of compound 3g.

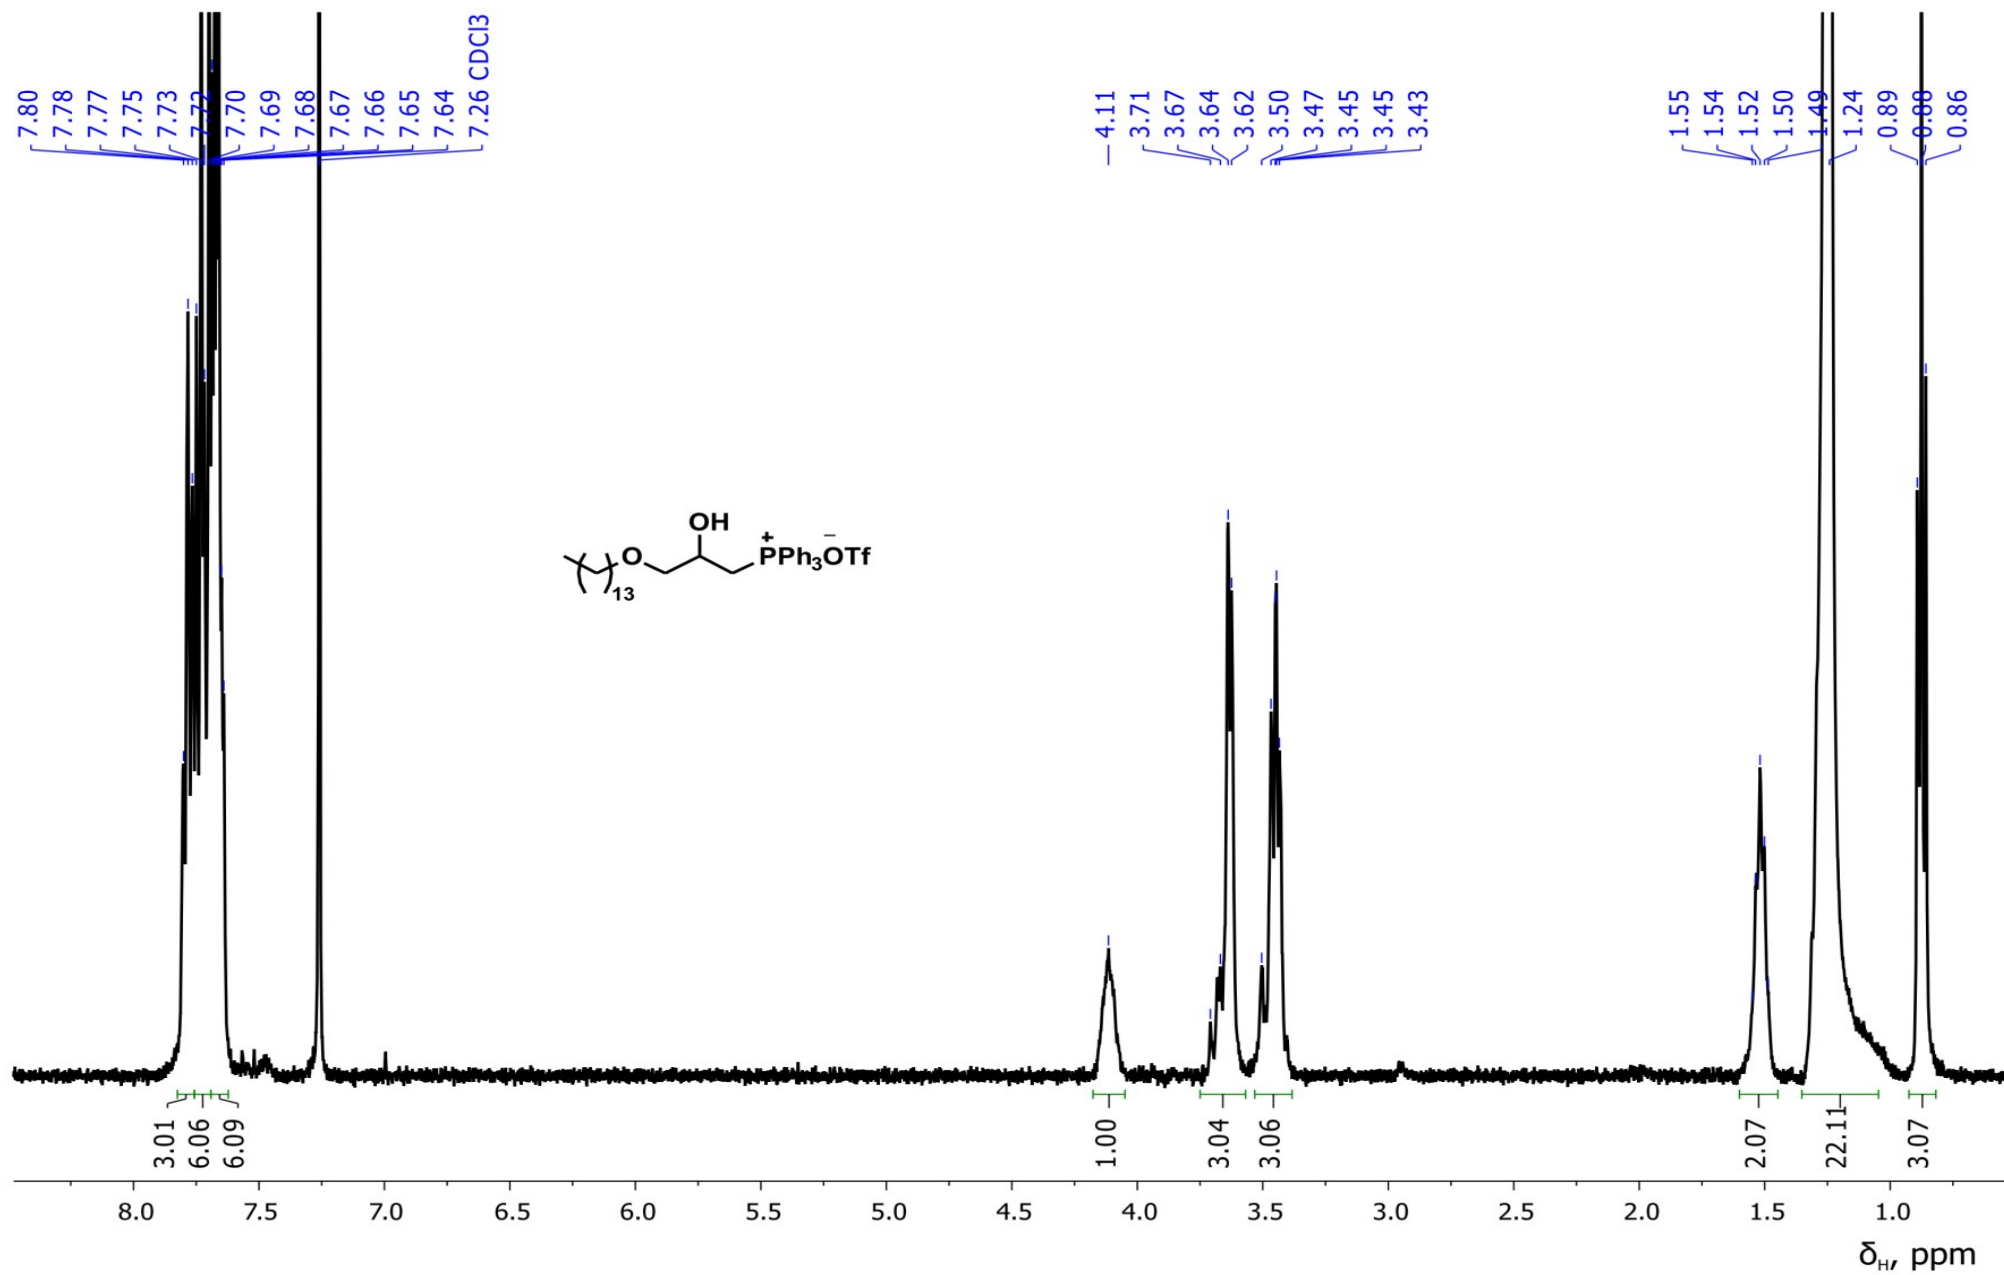

Figure S80.  $^1\text{H}$  NMR spectrum (400 MHz,  $\text{CDCl}_3$ ) of compound **3h**.

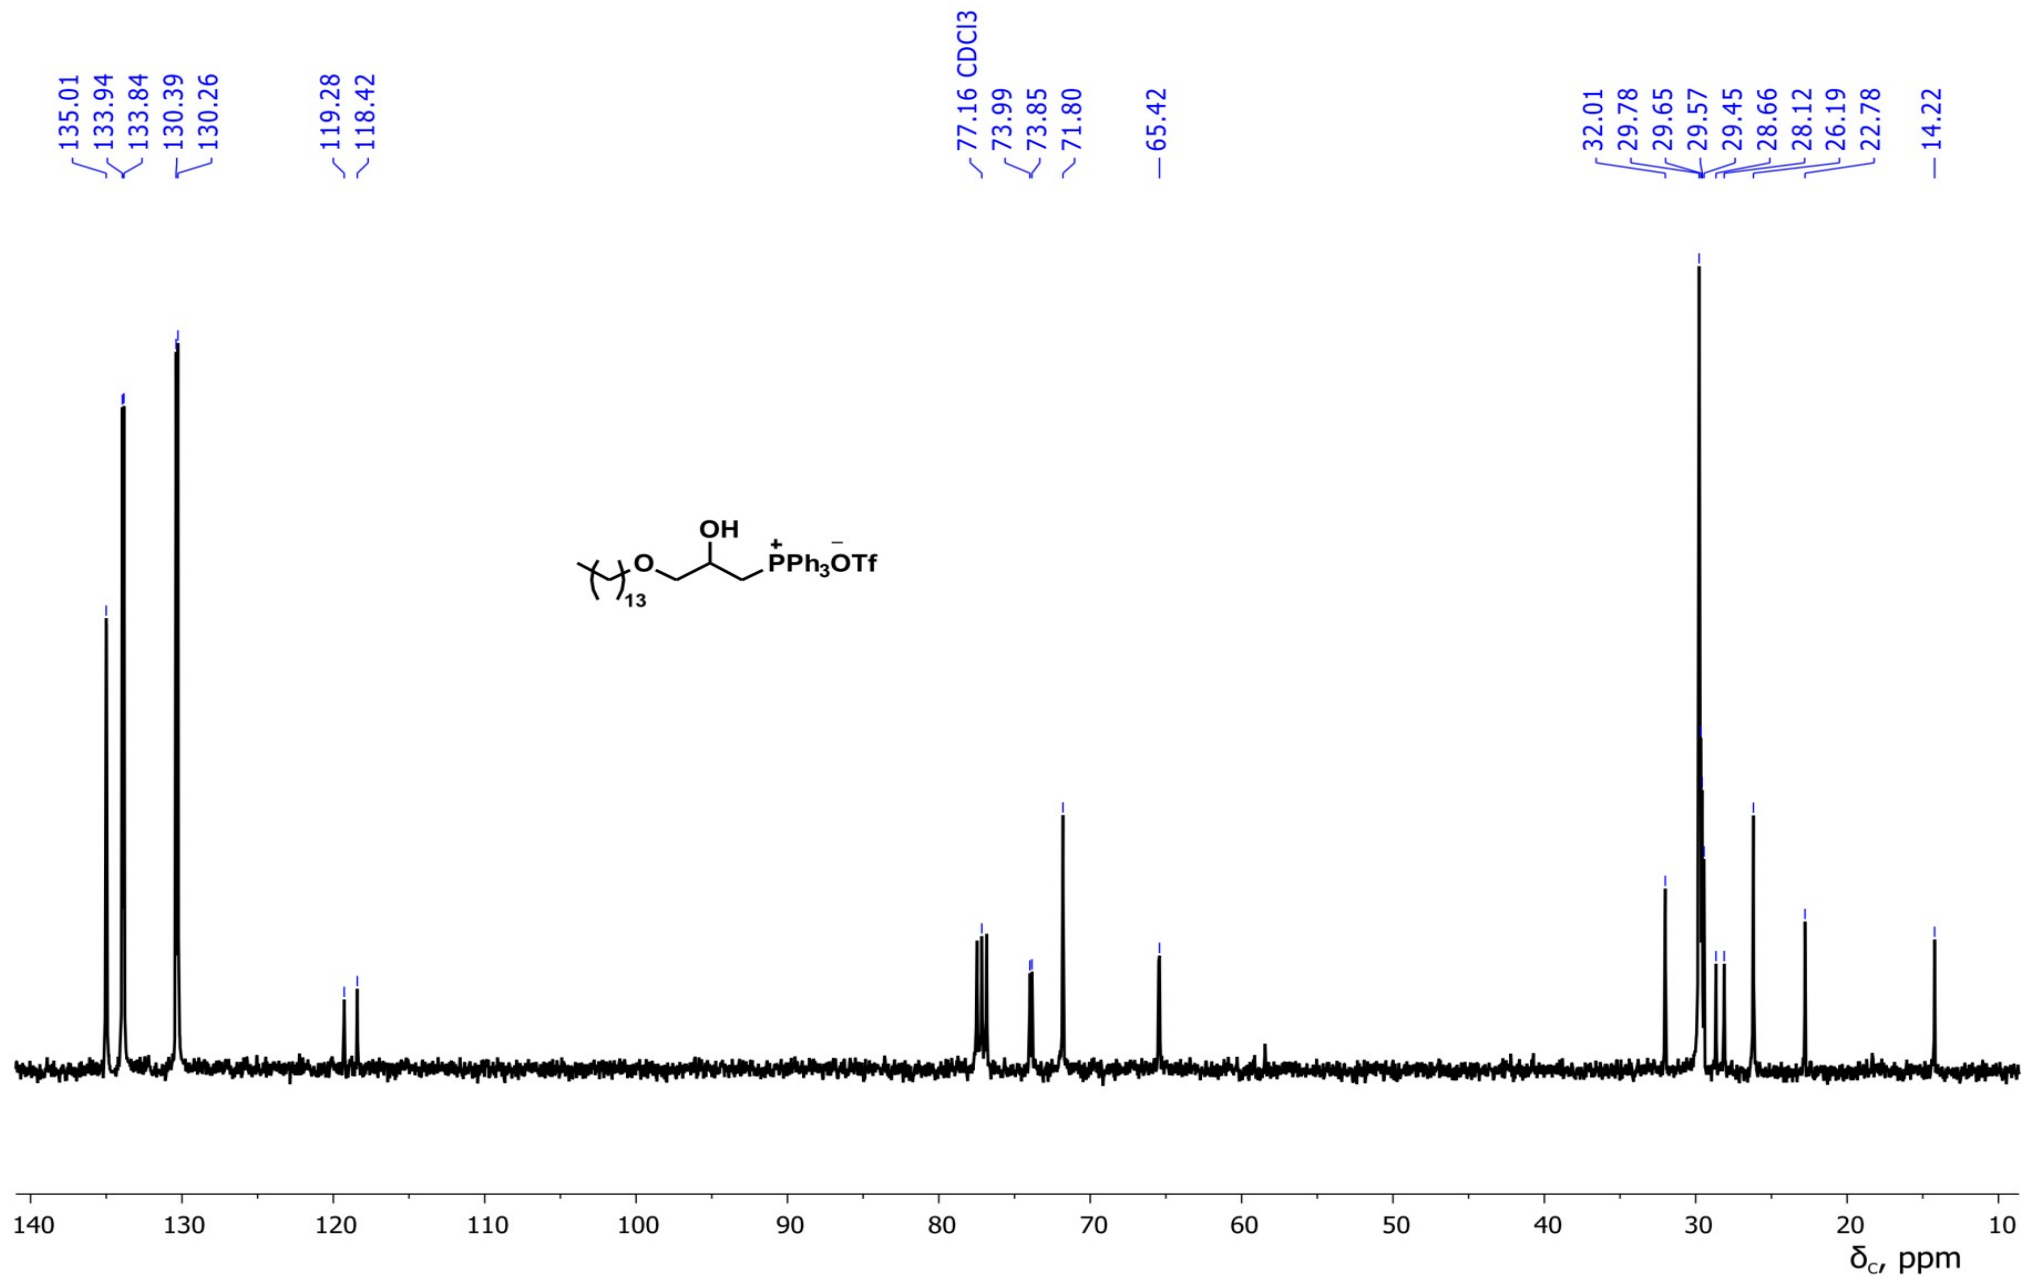

Figure S81.  $^{13}\text{C}$ - $\{^1\text{H}\}$  NMR spectrum (100.6 MHz,  $\text{CDCl}_3$ ) of compound **3h**.

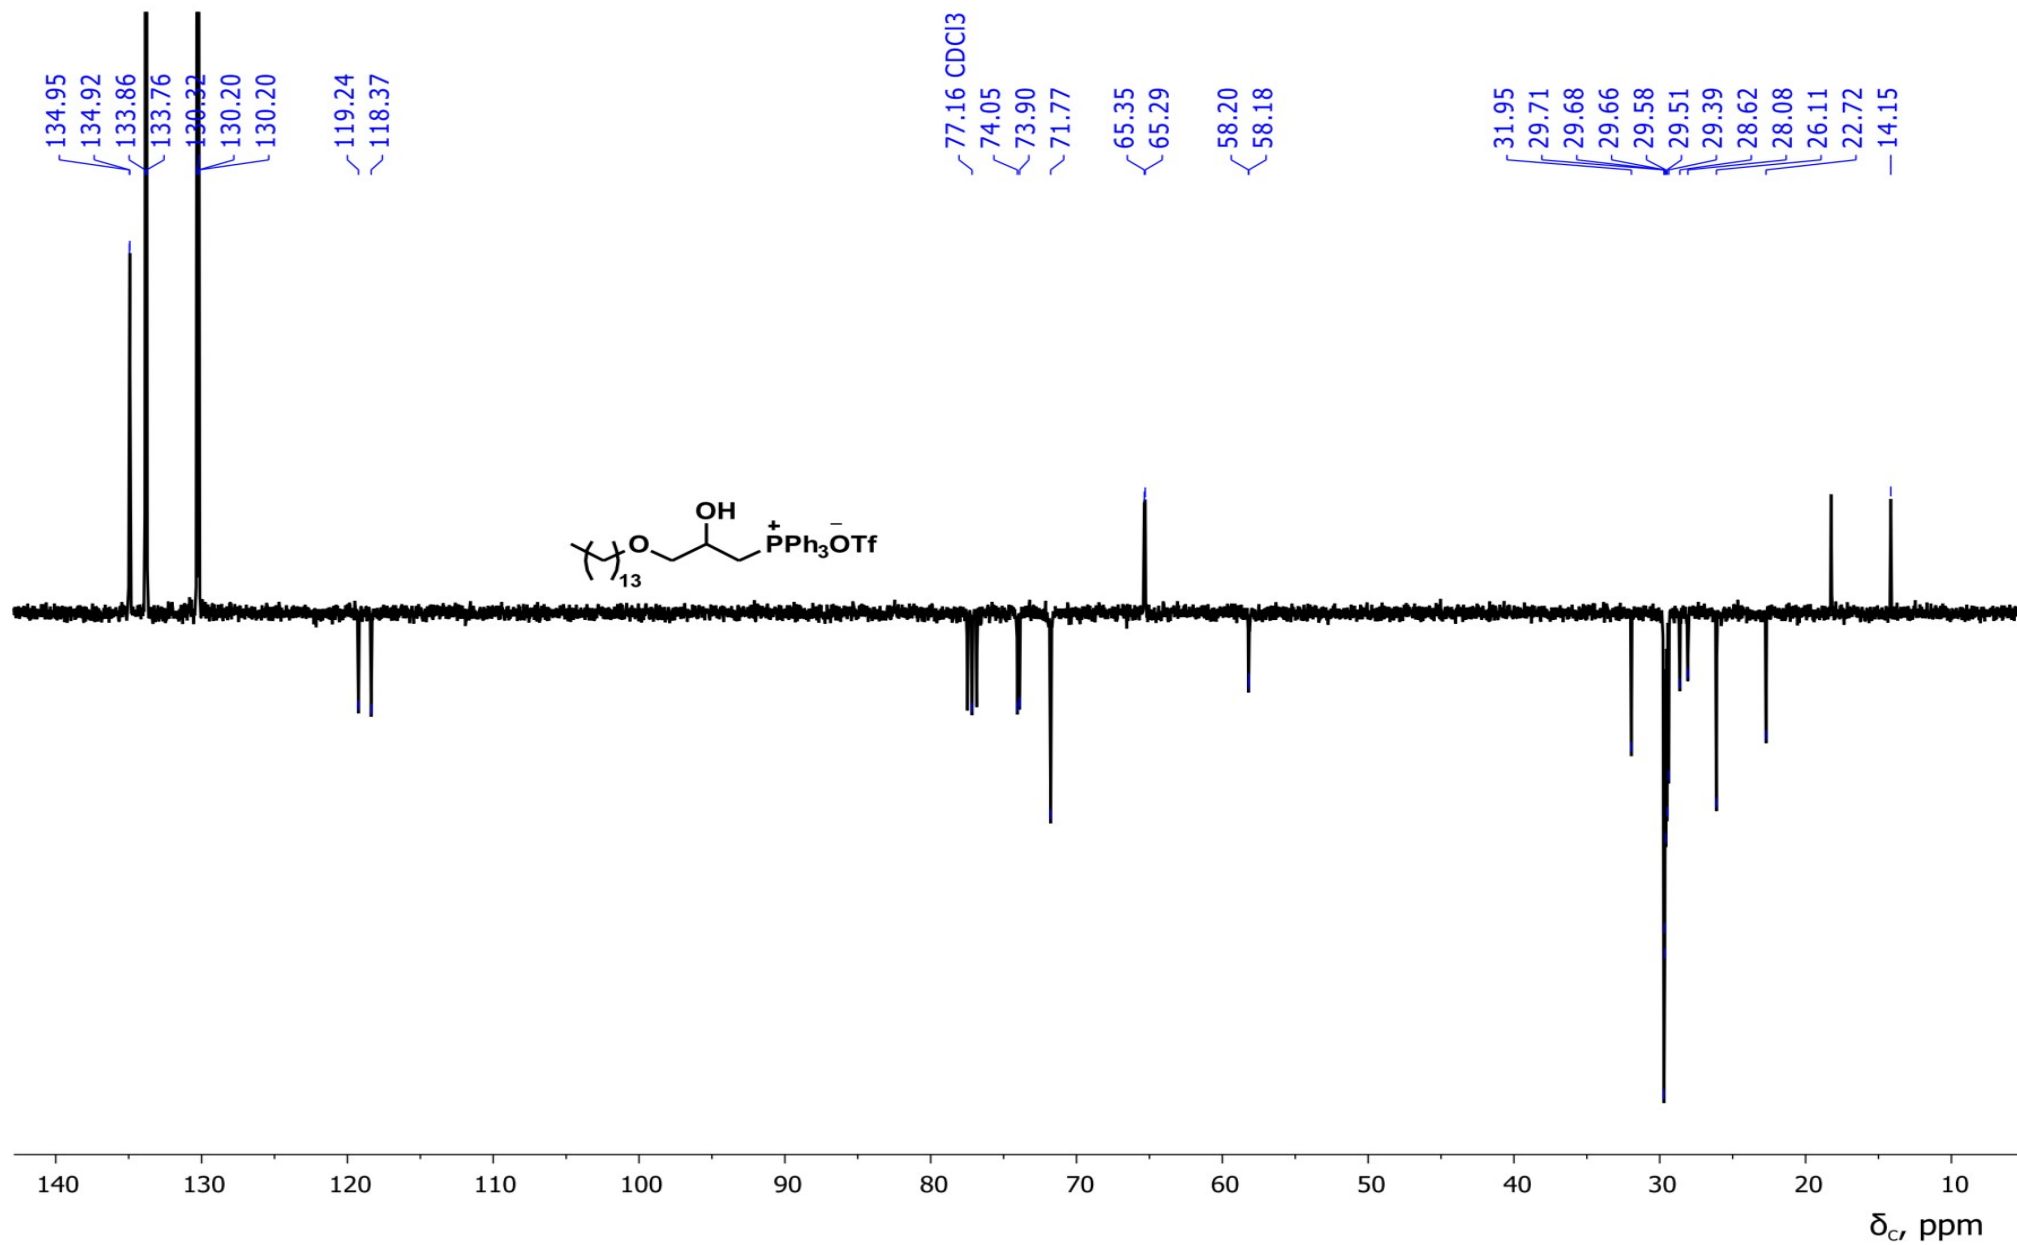

Figure S82.  $^{13}\text{C}$ - $\{^1\text{H}\}$  APT NMR spectrum (100.6 MHz,  $\text{CDCl}_3$ ) of compound **3h**.

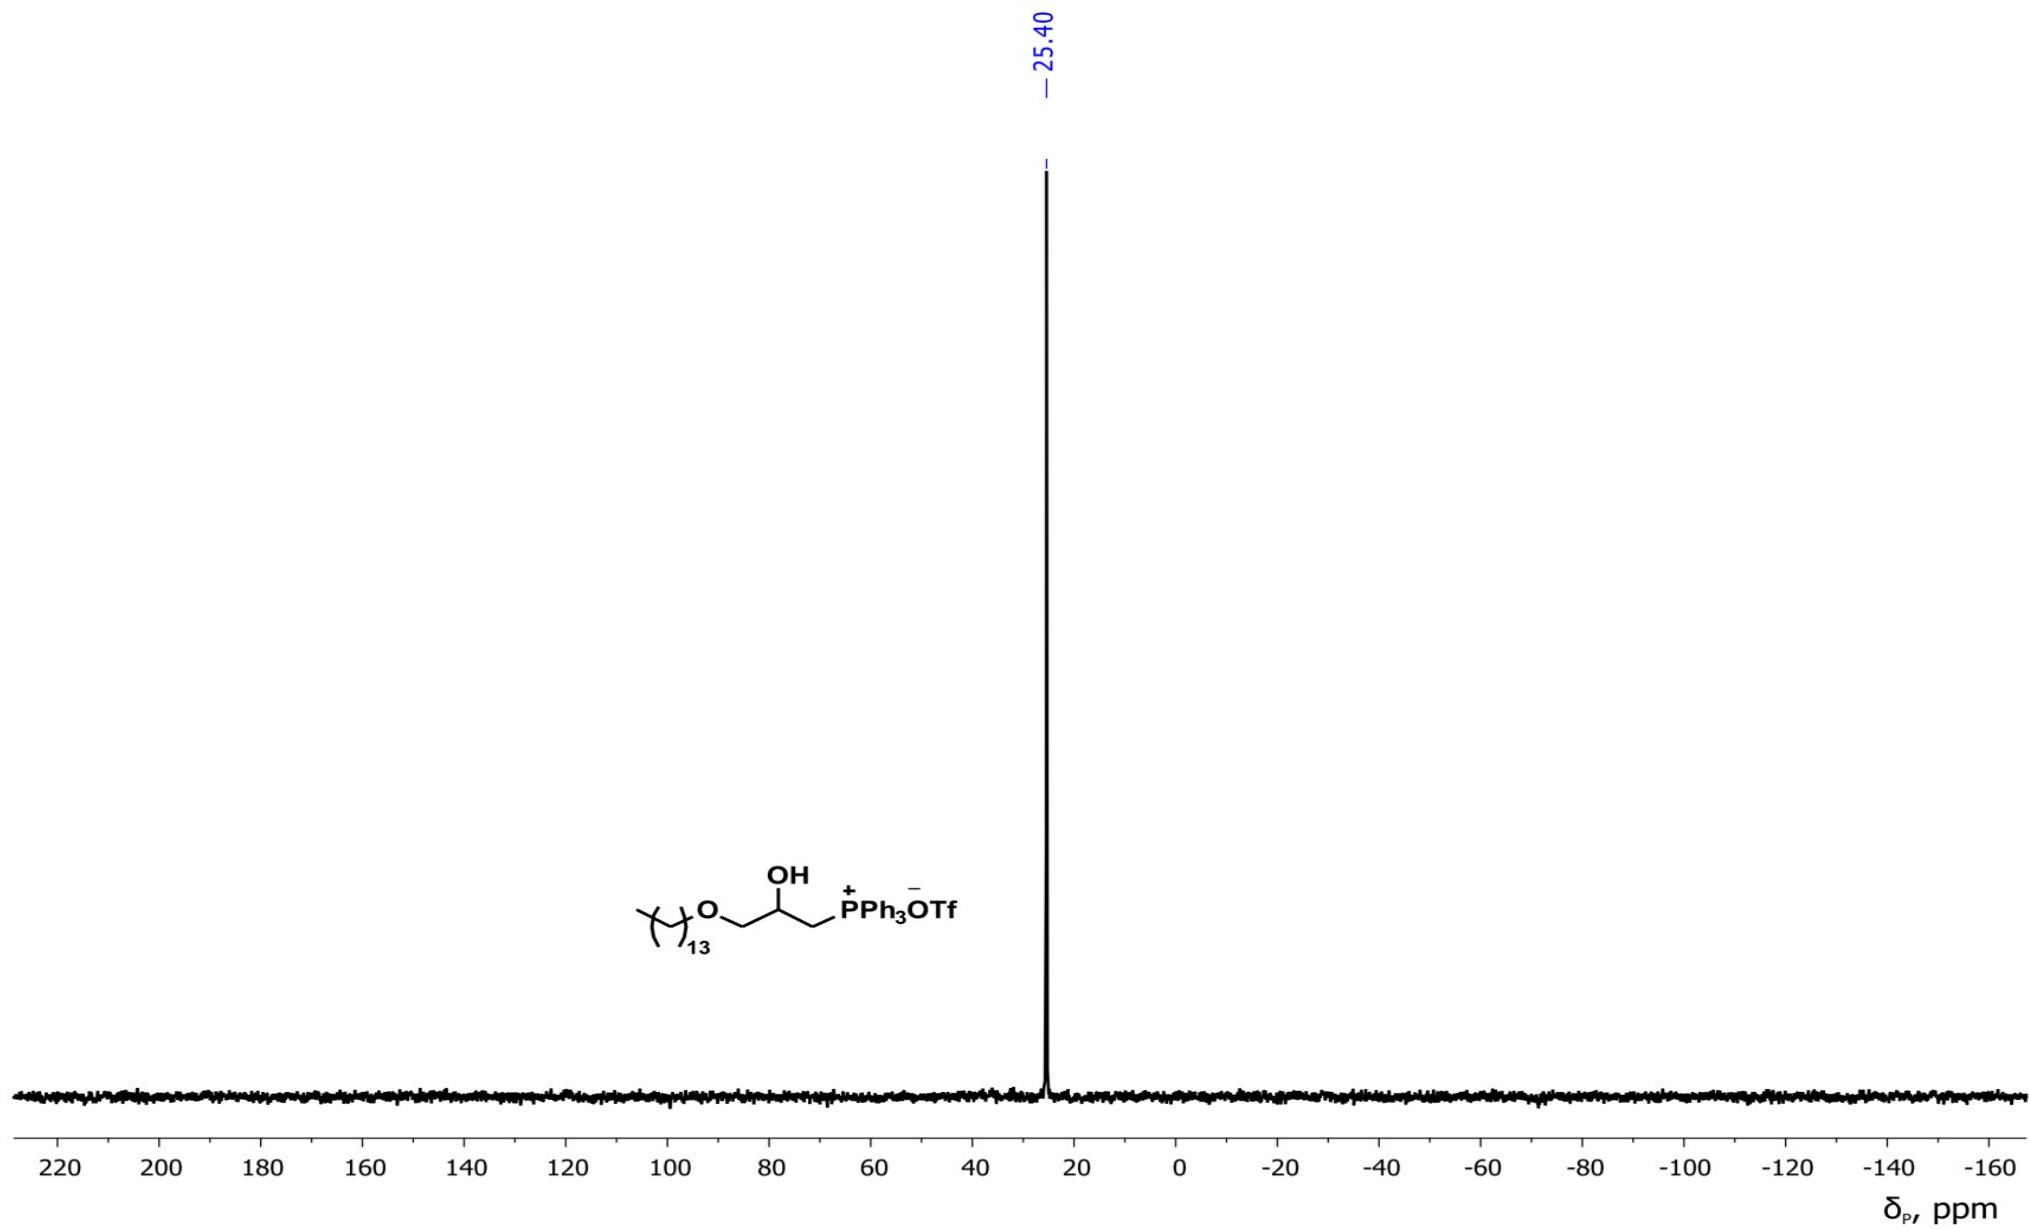

**Figure S83.**  $^{31}\text{P}$ - $\{^1\text{H}\}$  NMR spectrum (162 MHz,  $\text{CDCl}_3$ ) of compound **3h**.

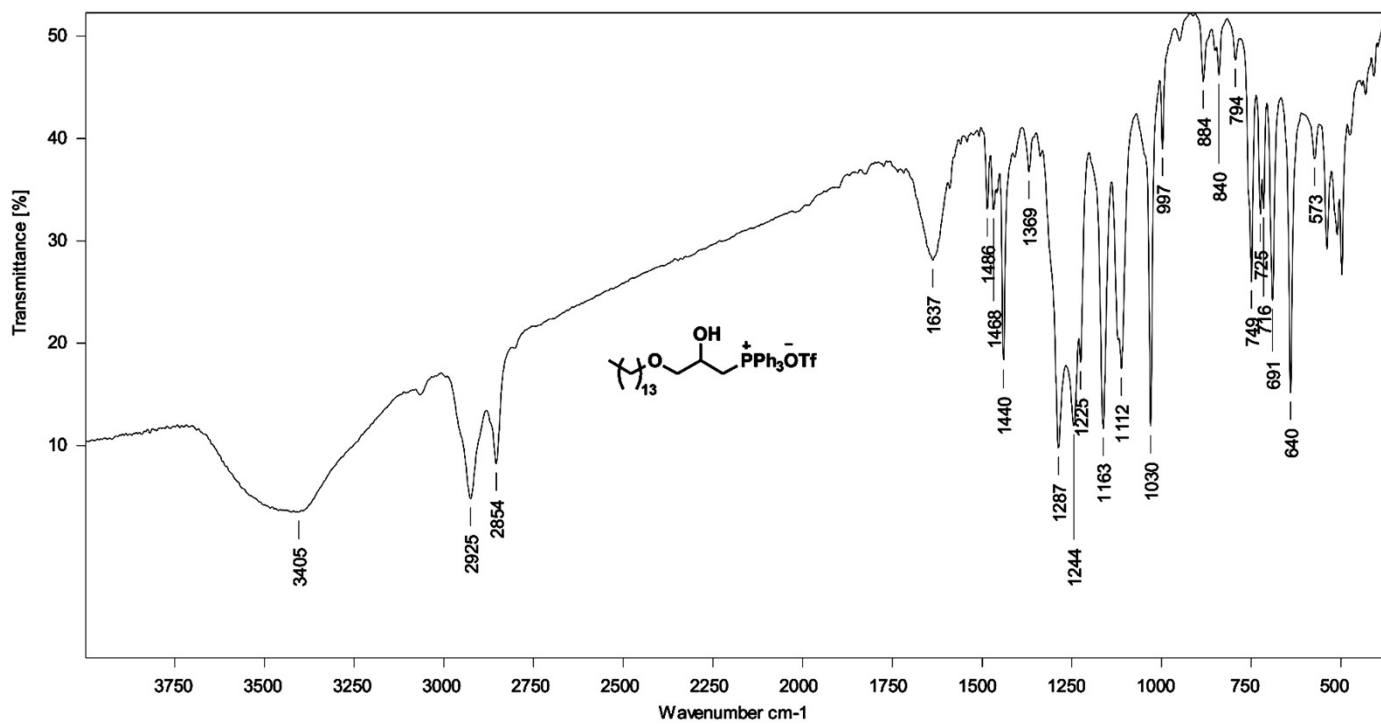

Figure S84. IR spectrum (KBr) of compound 3h.

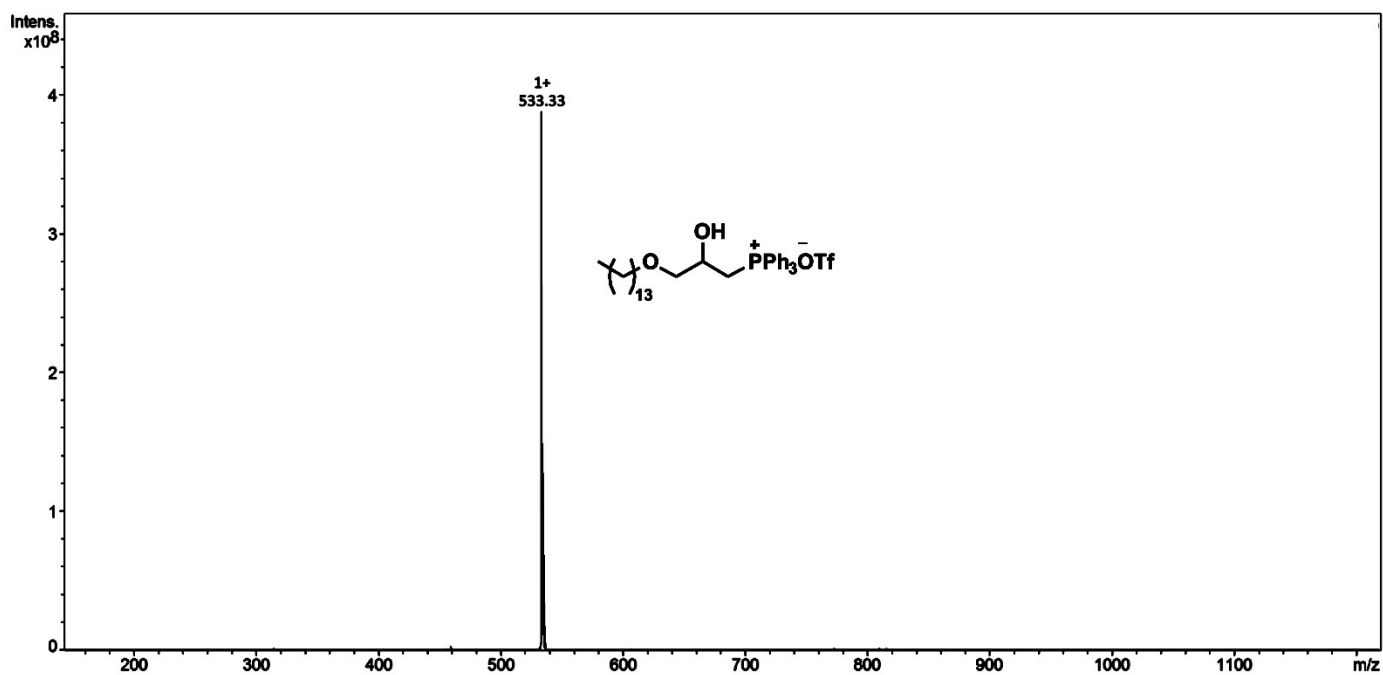

Figure S85. ESI-MS spectrum of compound 3h.

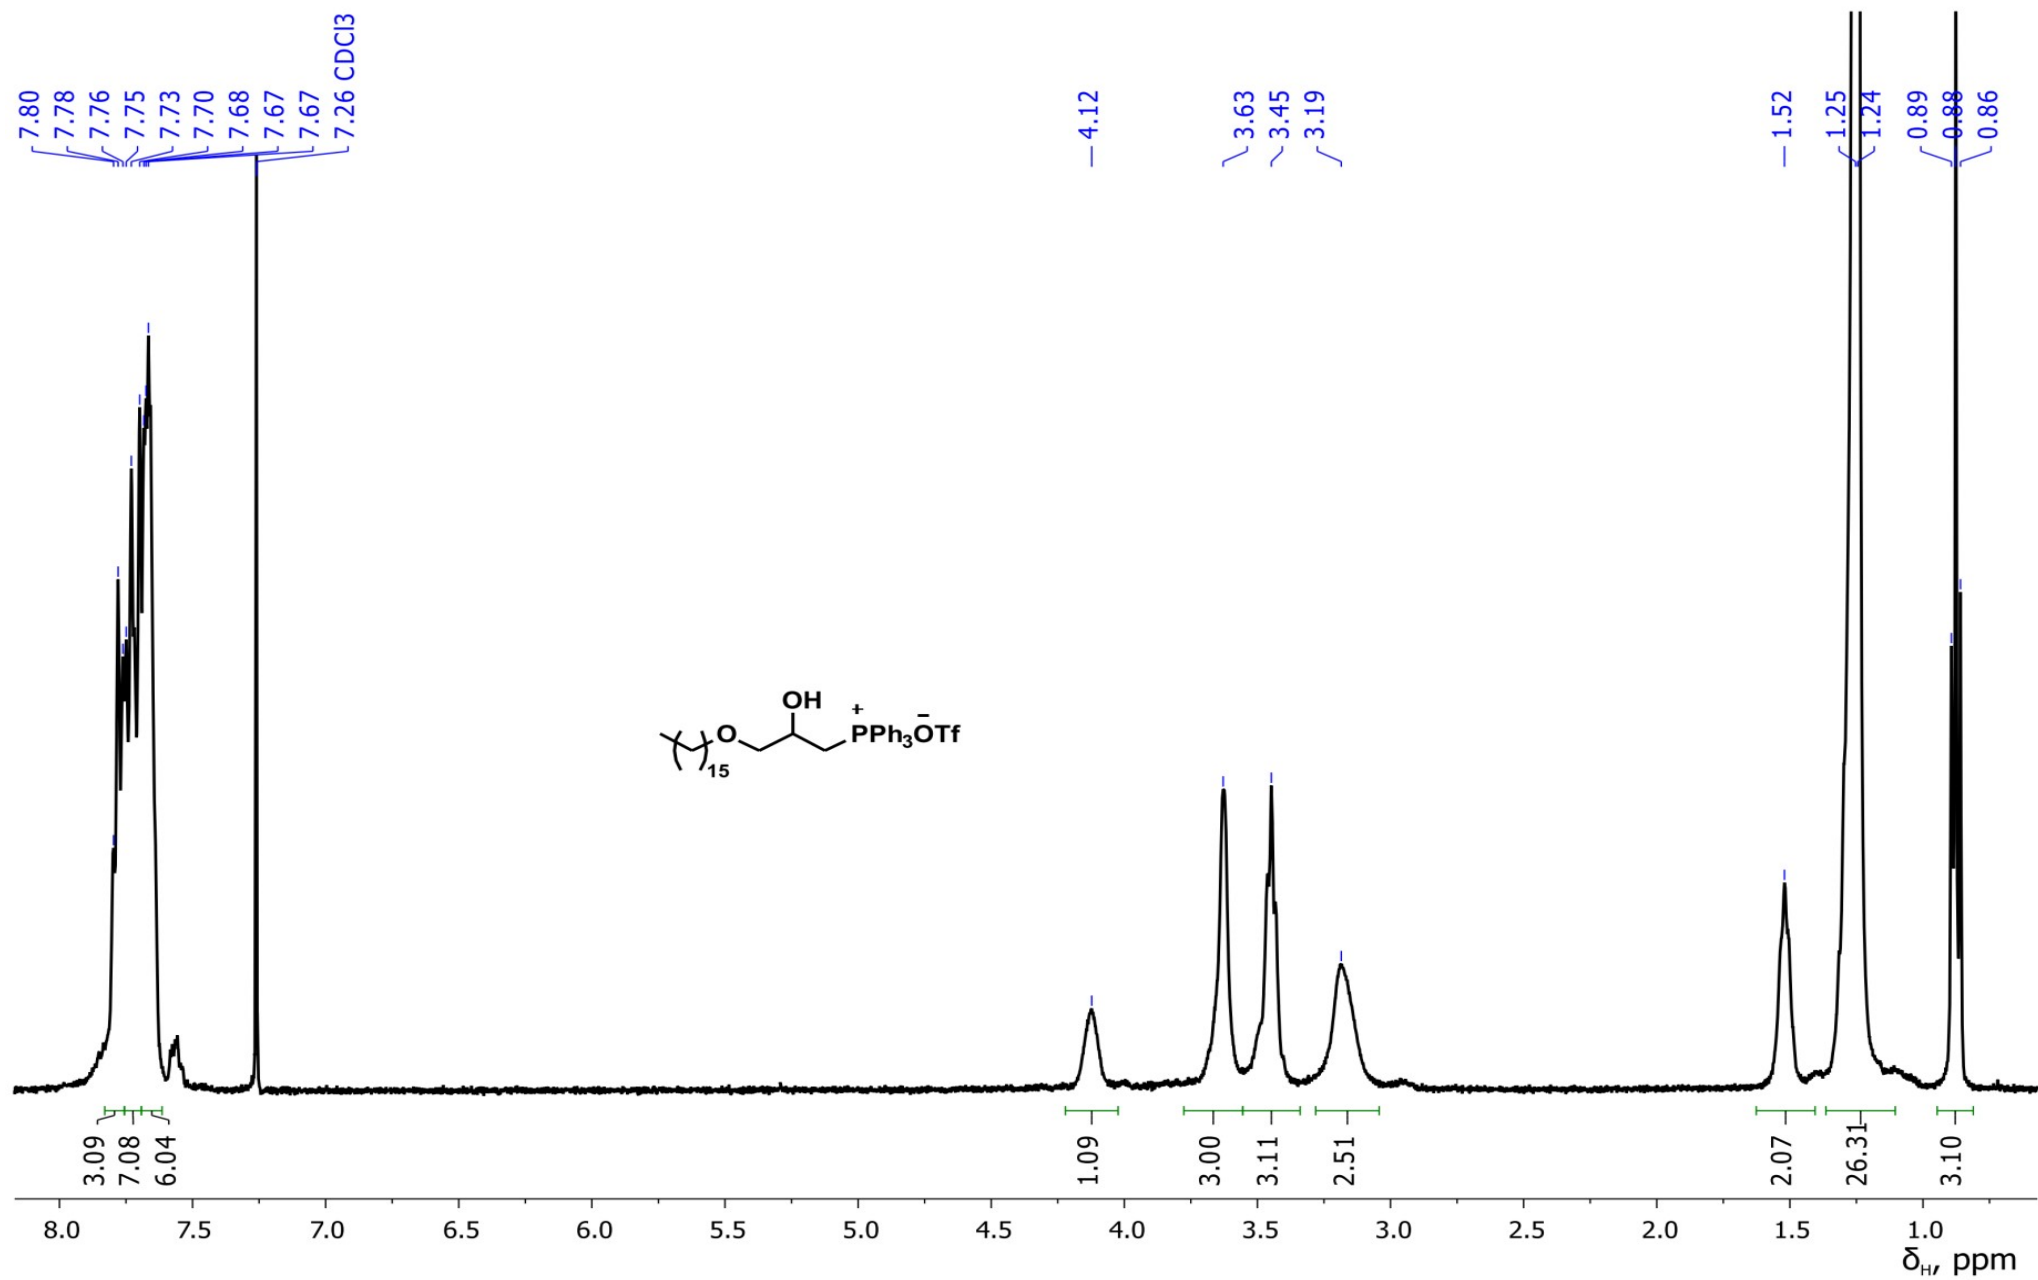

**Figure S86.**  $^1\text{H}$  NMR spectrum (400 MHz,  $\text{CDCl}_3$ ) of compound **3i**.

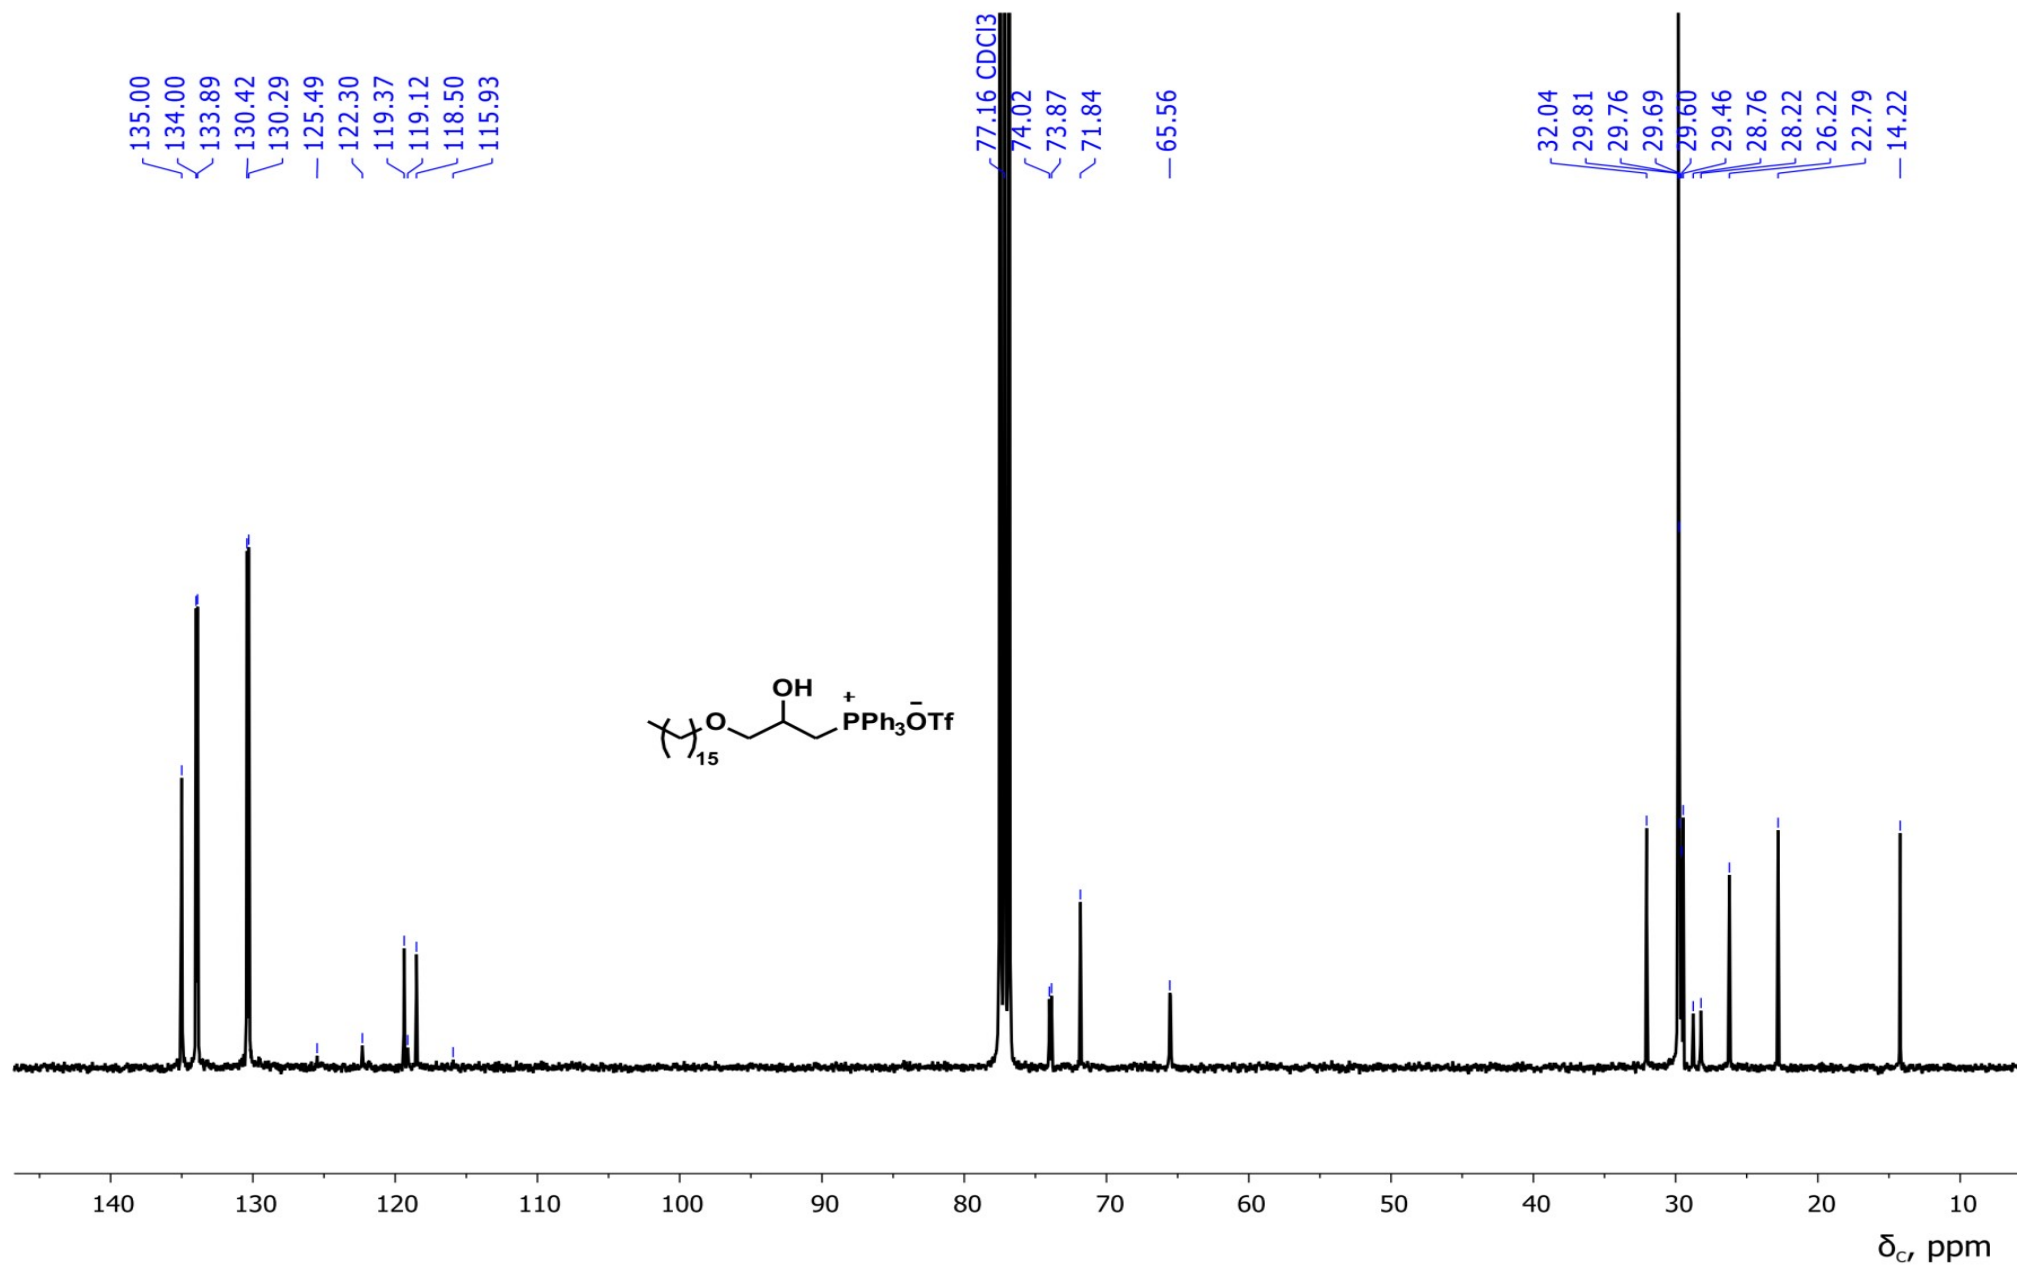

Figure S87.  $^{13}\text{C}\{-^1\text{H}\}$  NMR spectrum (100.6 MHz,  $\text{CDCl}_3$ ) of compound **3i**.

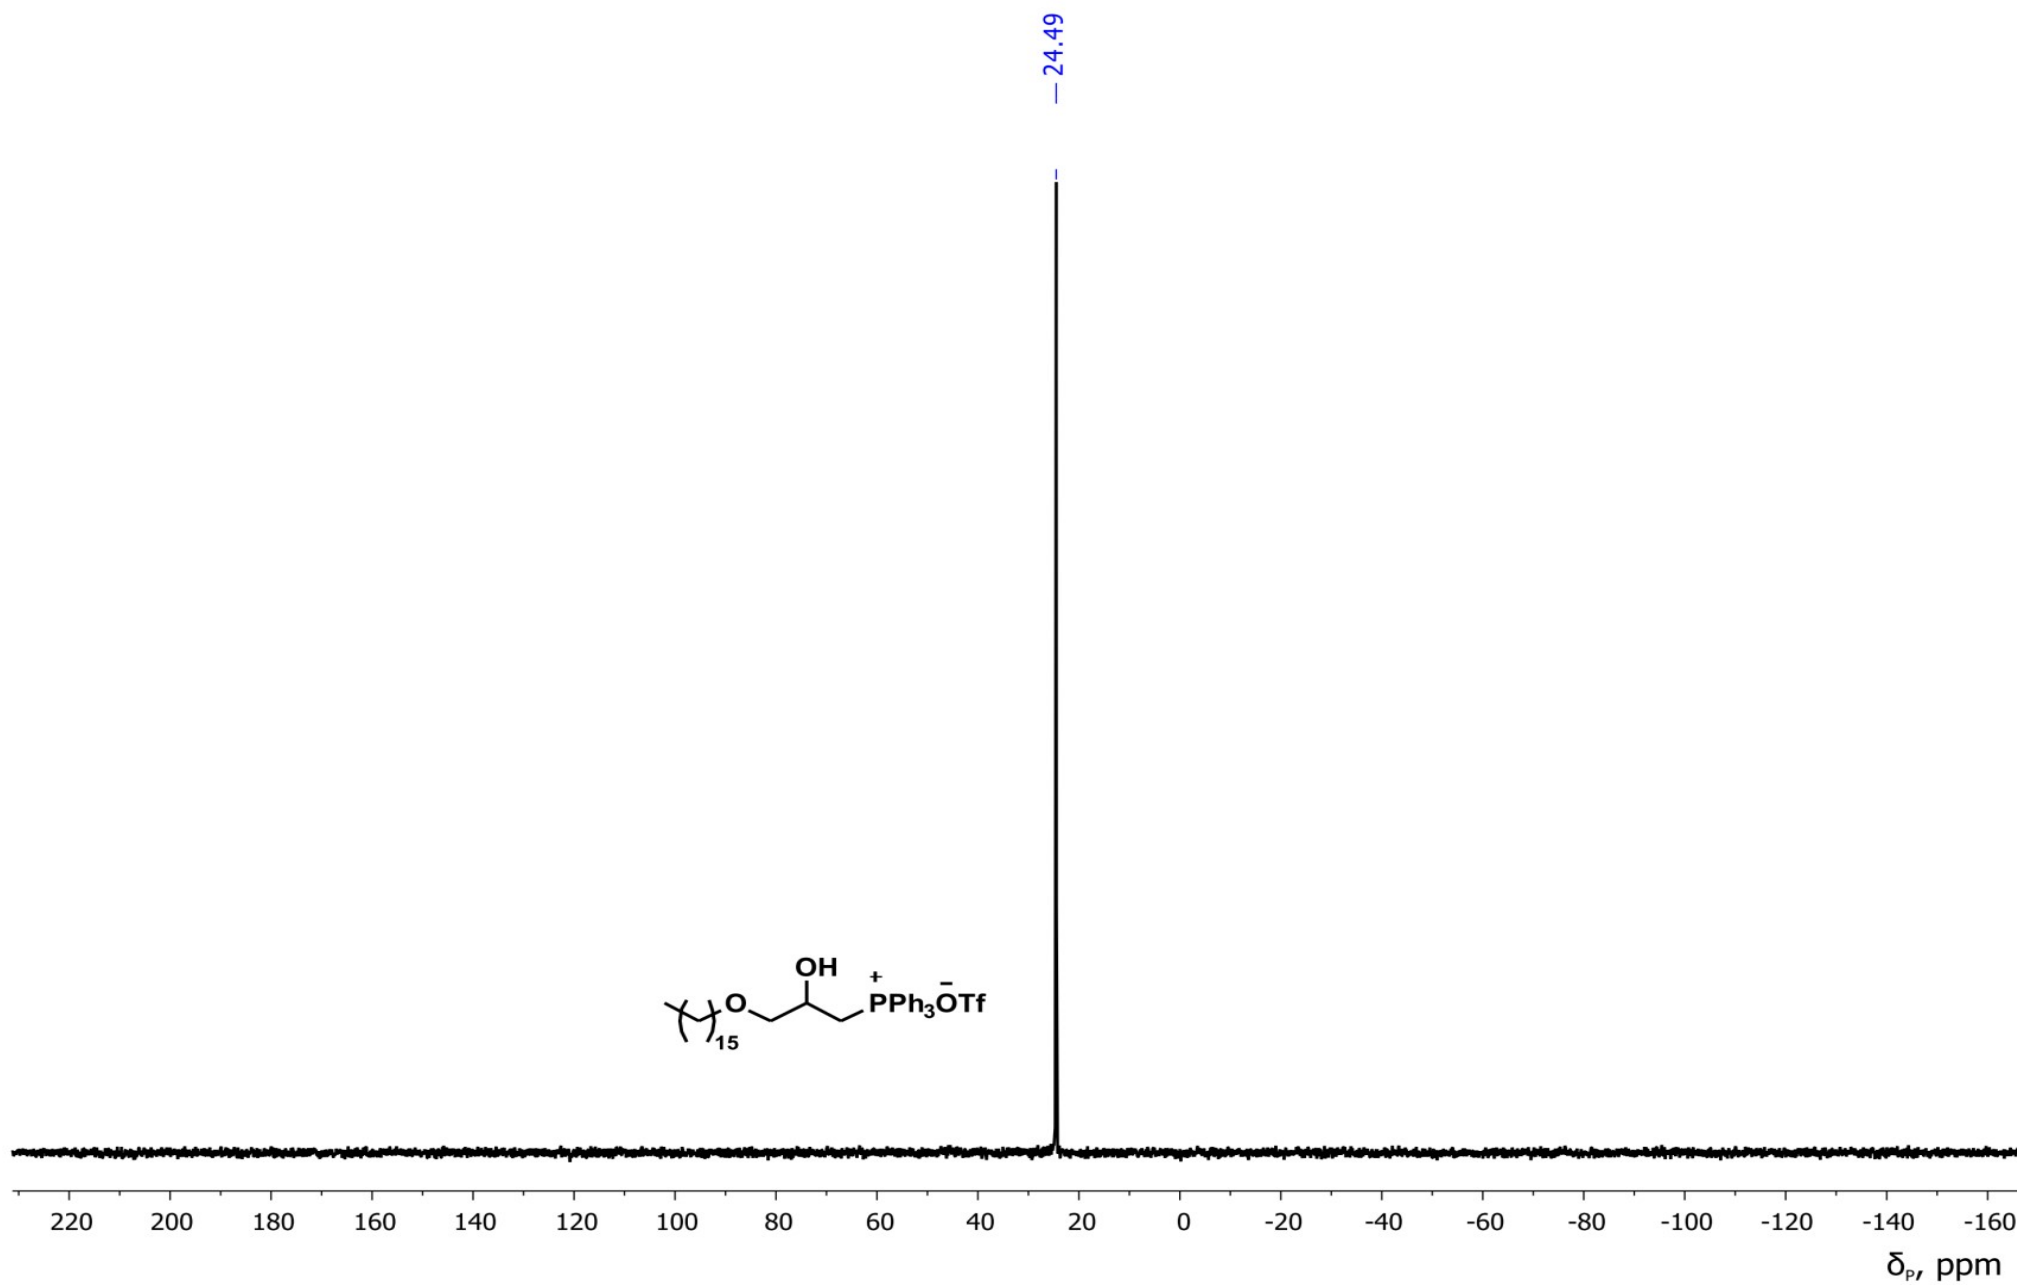

**Figure S88.**  $^{31}\text{P}$ - $\{^1\text{H}\}$  NMR spectrum (162 MHz,  $\text{CDCl}_3$ ) of compound **3i**.

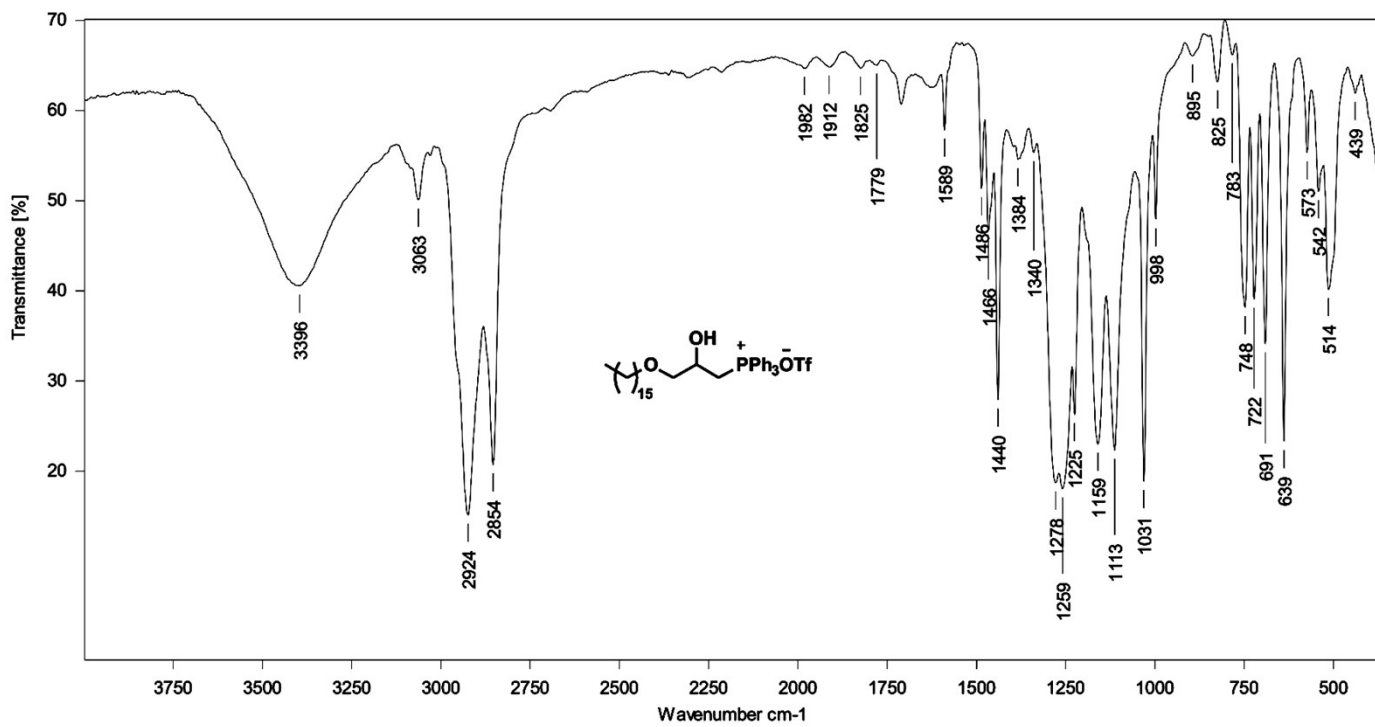

Figure S89. IR spectrum (KBr) of compound 3i.

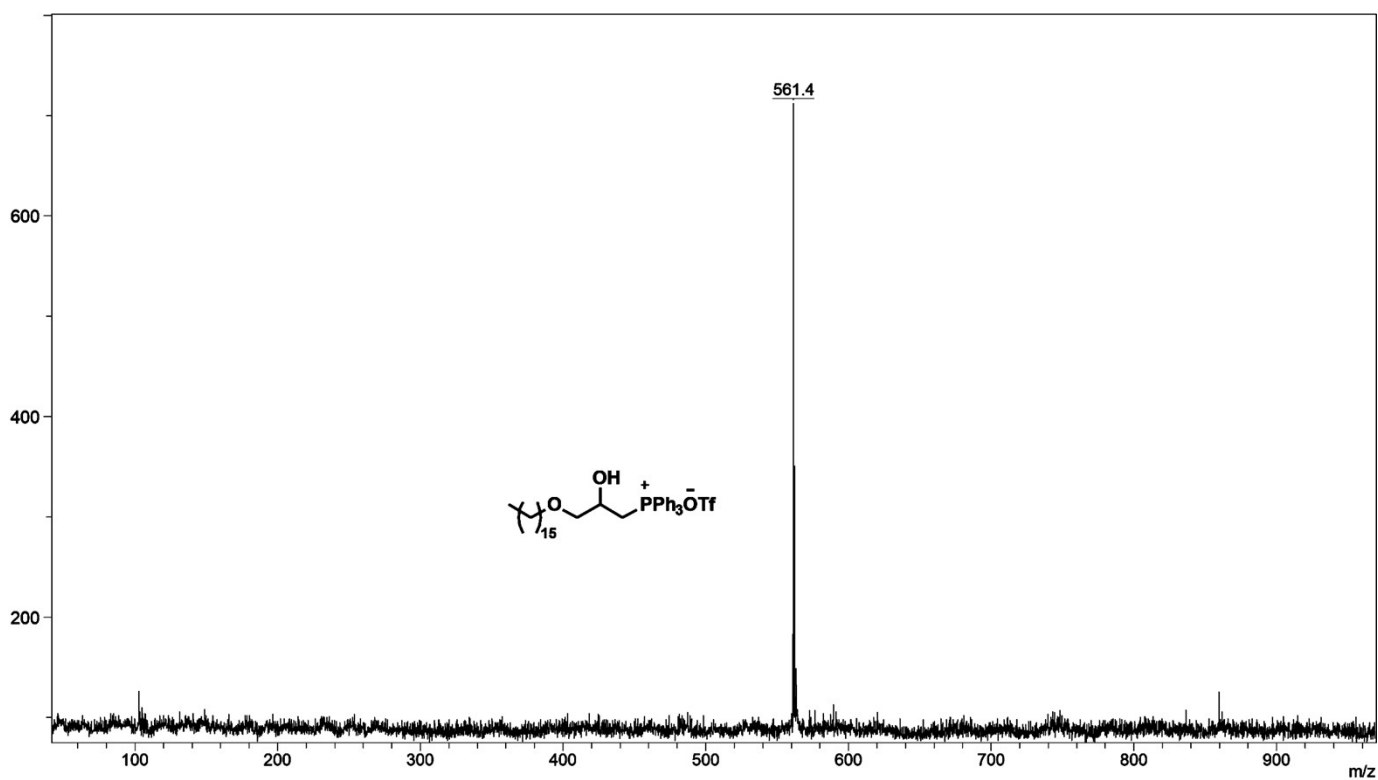

Figure S90. MALDI-MS spectrum of compound 3i.

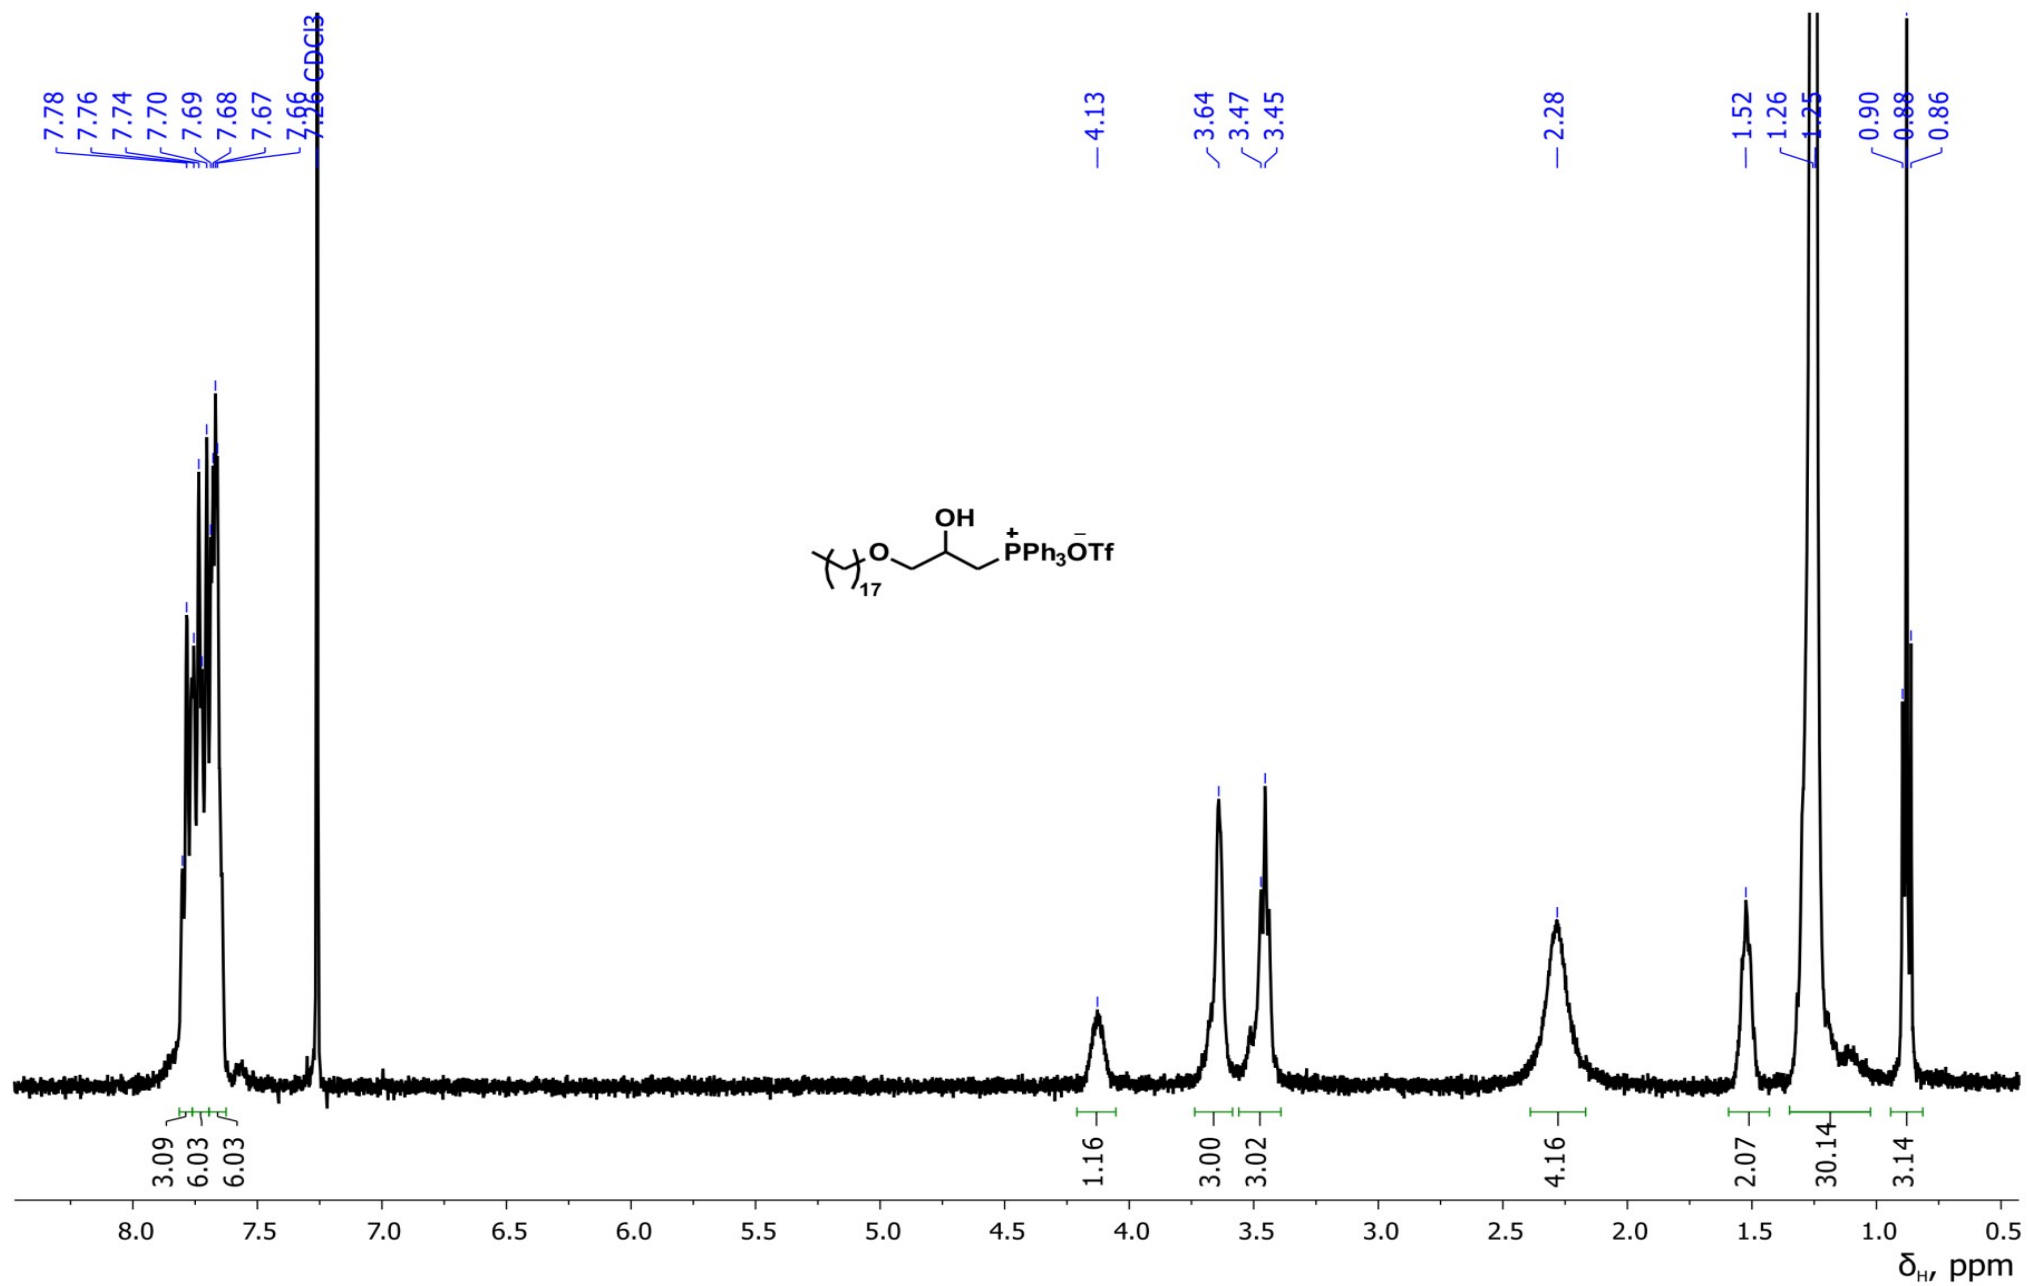

Figure S91. <sup>1</sup>H NMR spectrum (400 MHz, CDCl<sub>3</sub>) of compound **3j**.

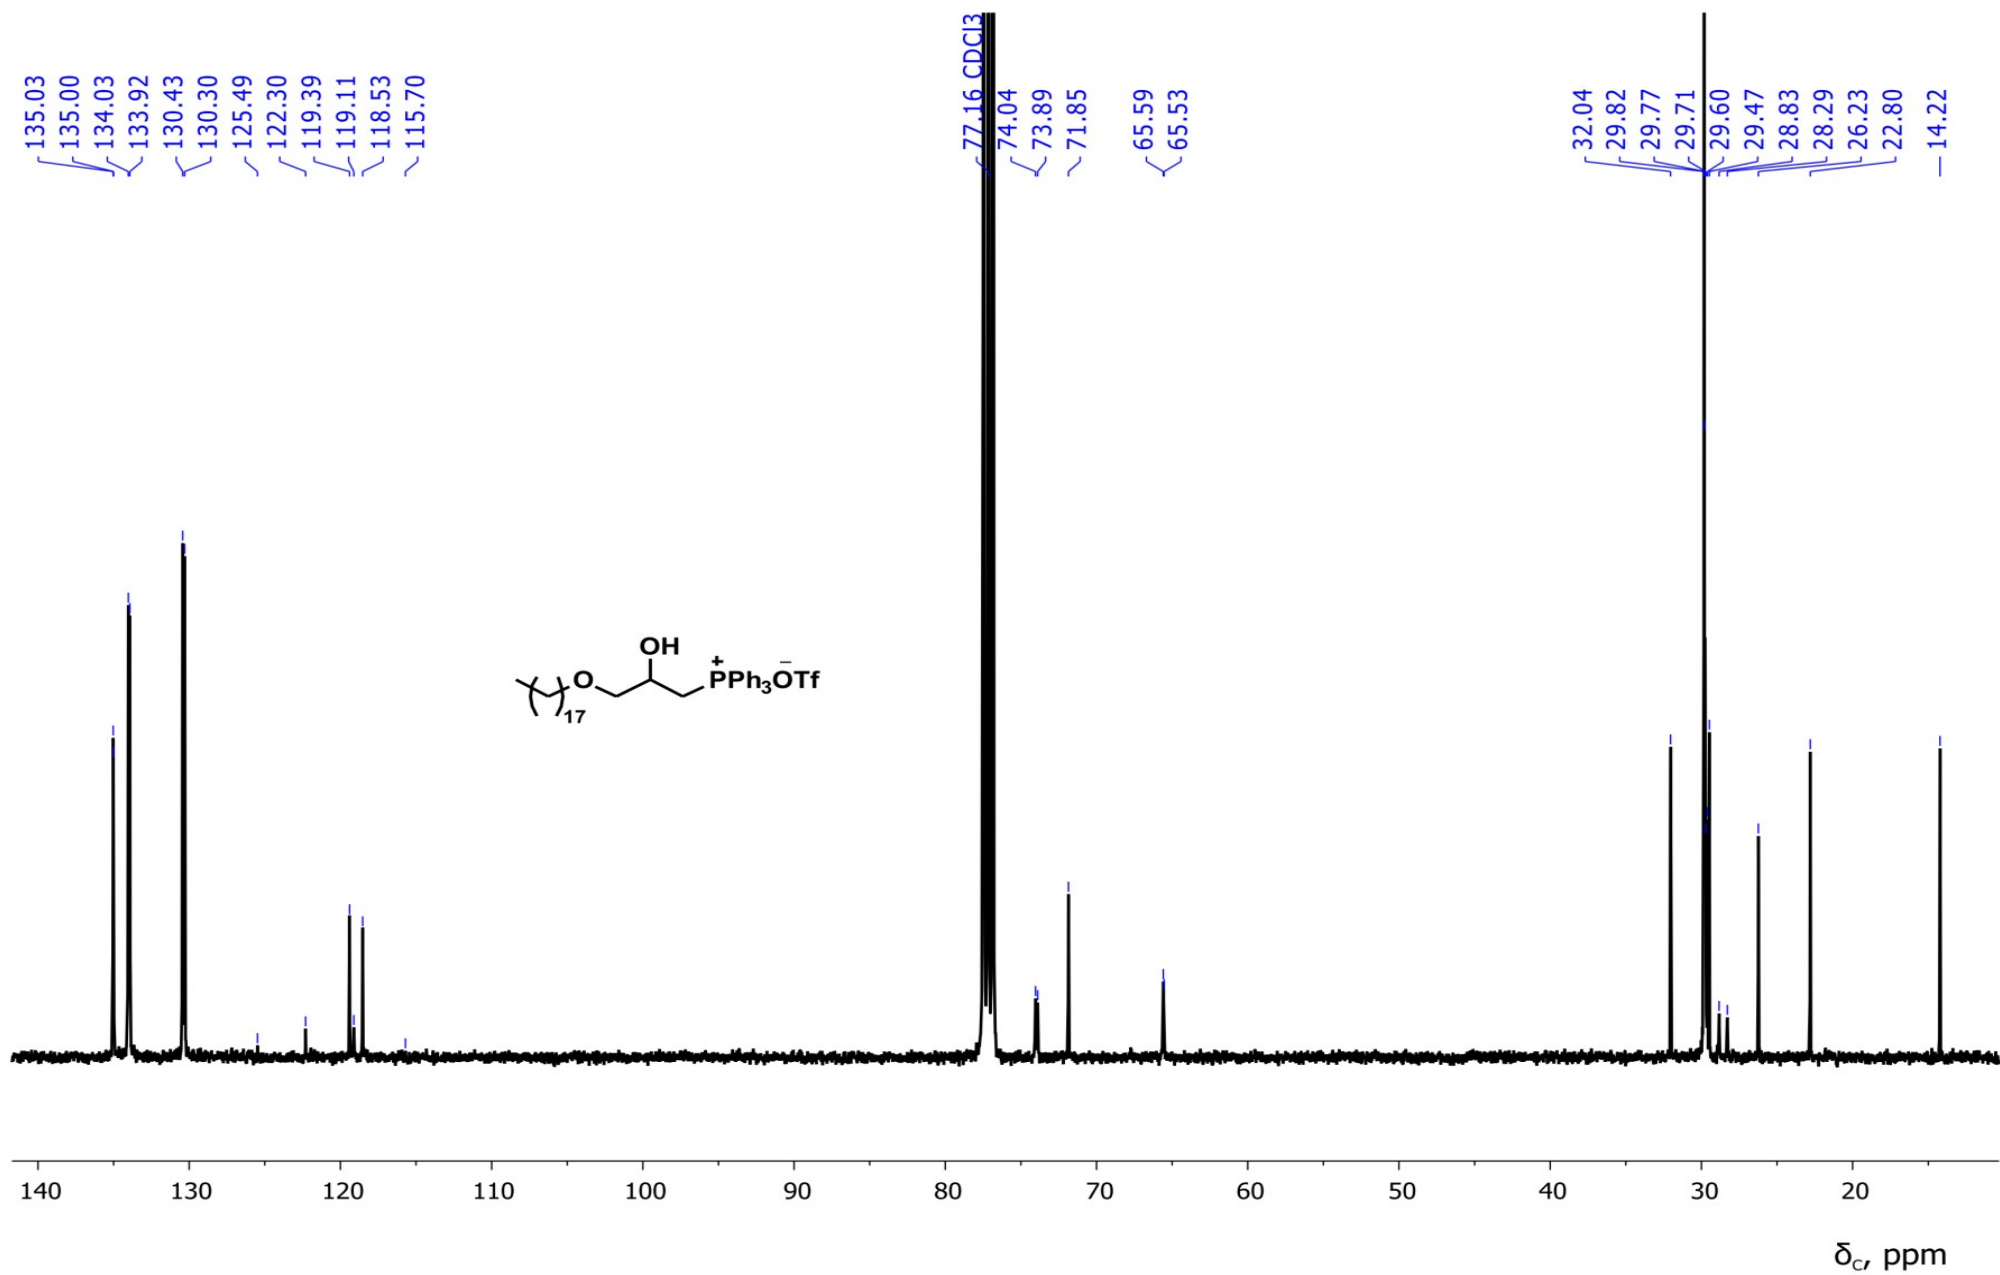

Figure S92. <sup>13</sup>C-<sup>1</sup>H} NMR spectrum (100.6 MHz, CDCl<sub>3</sub>) of compound **3j**.

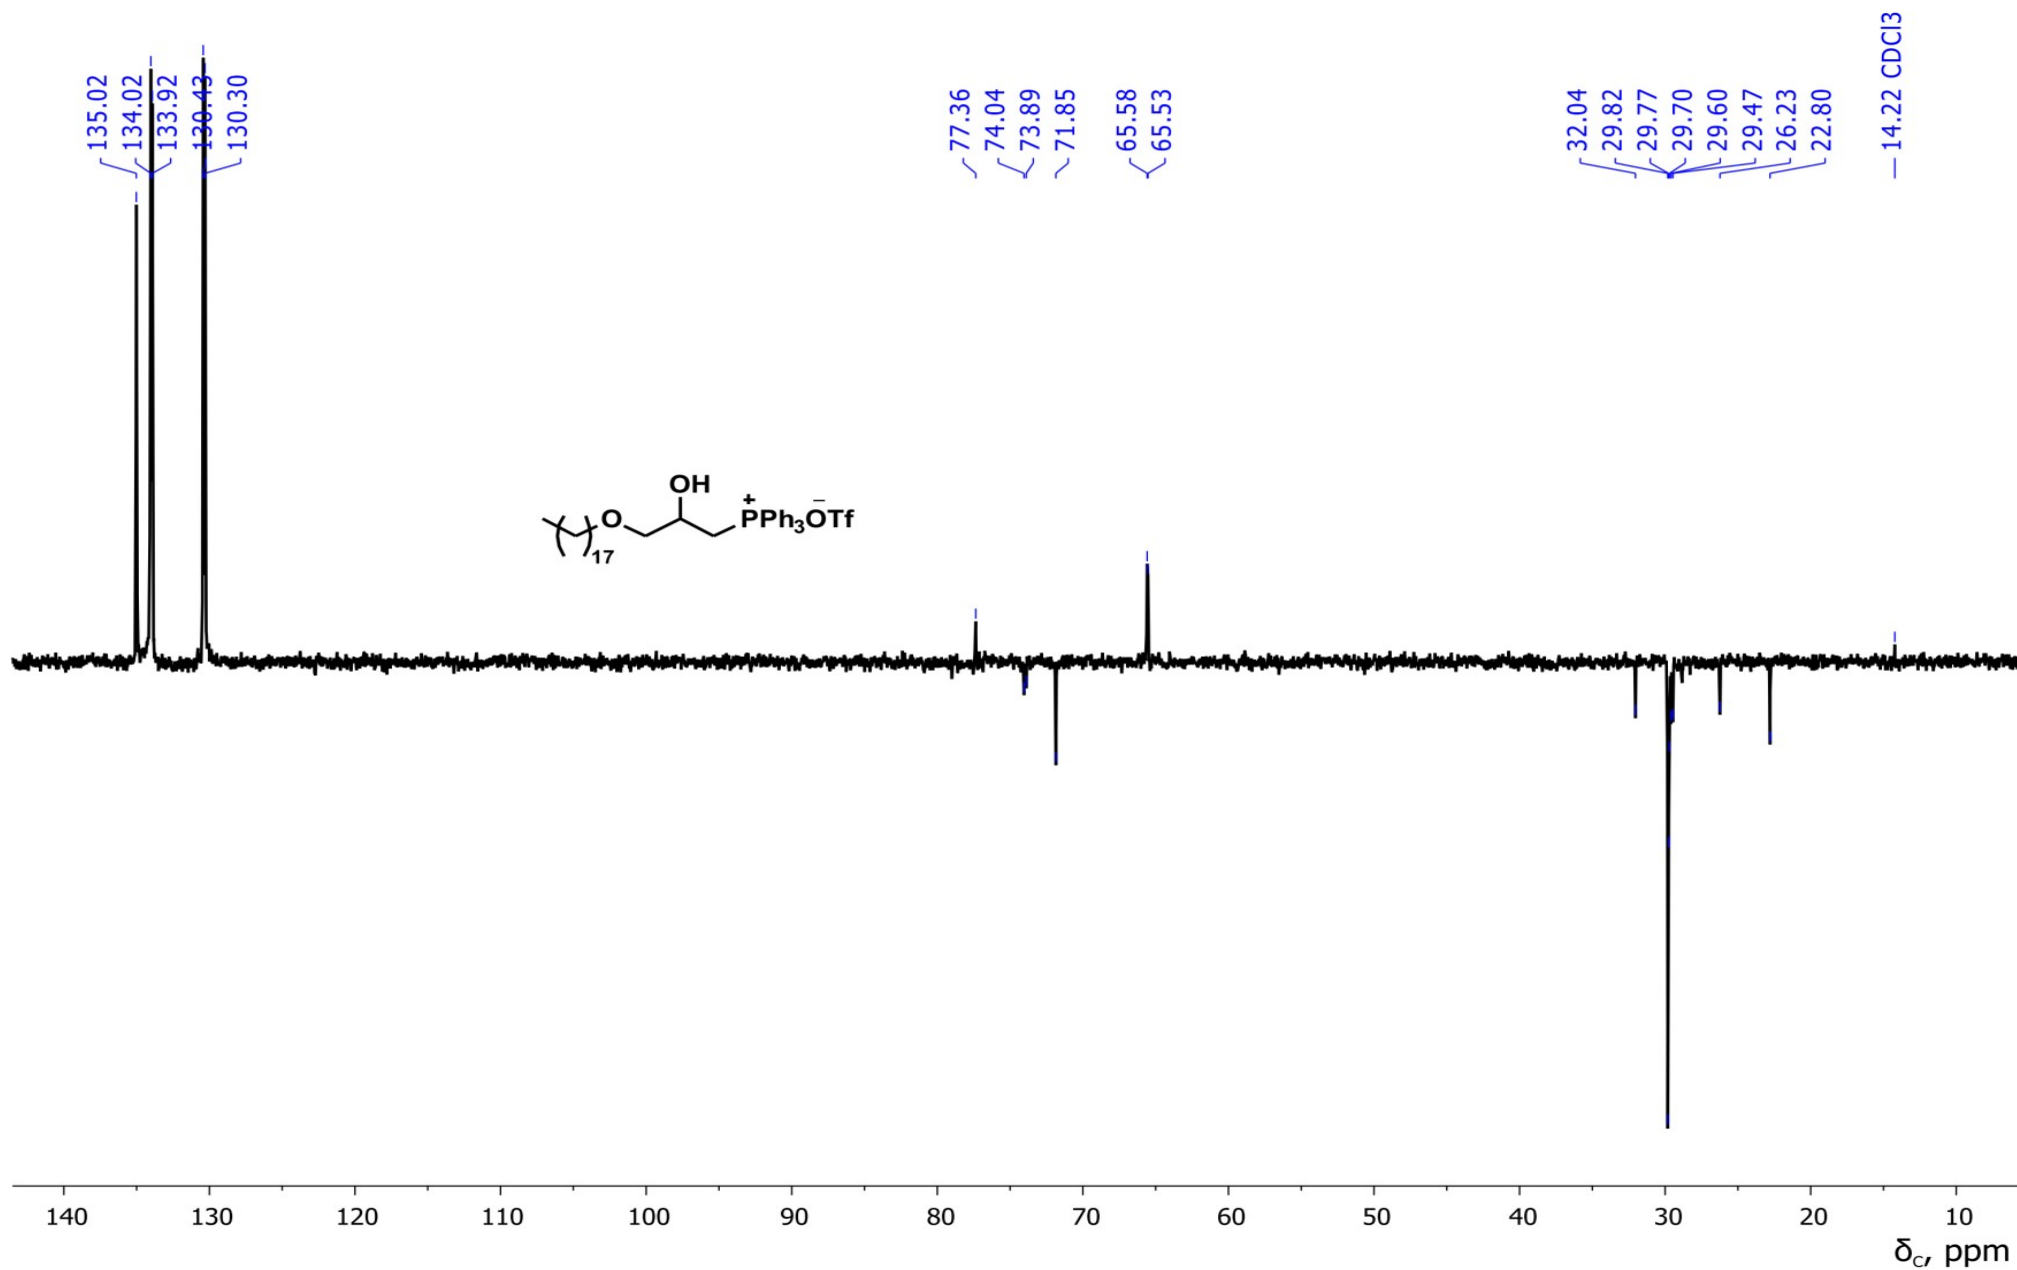

Figure S93. <sup>13</sup>C-<sup>1</sup>H APT NMR spectrum (100.6 MHz, CDCl<sub>3</sub>) of compound 3j.

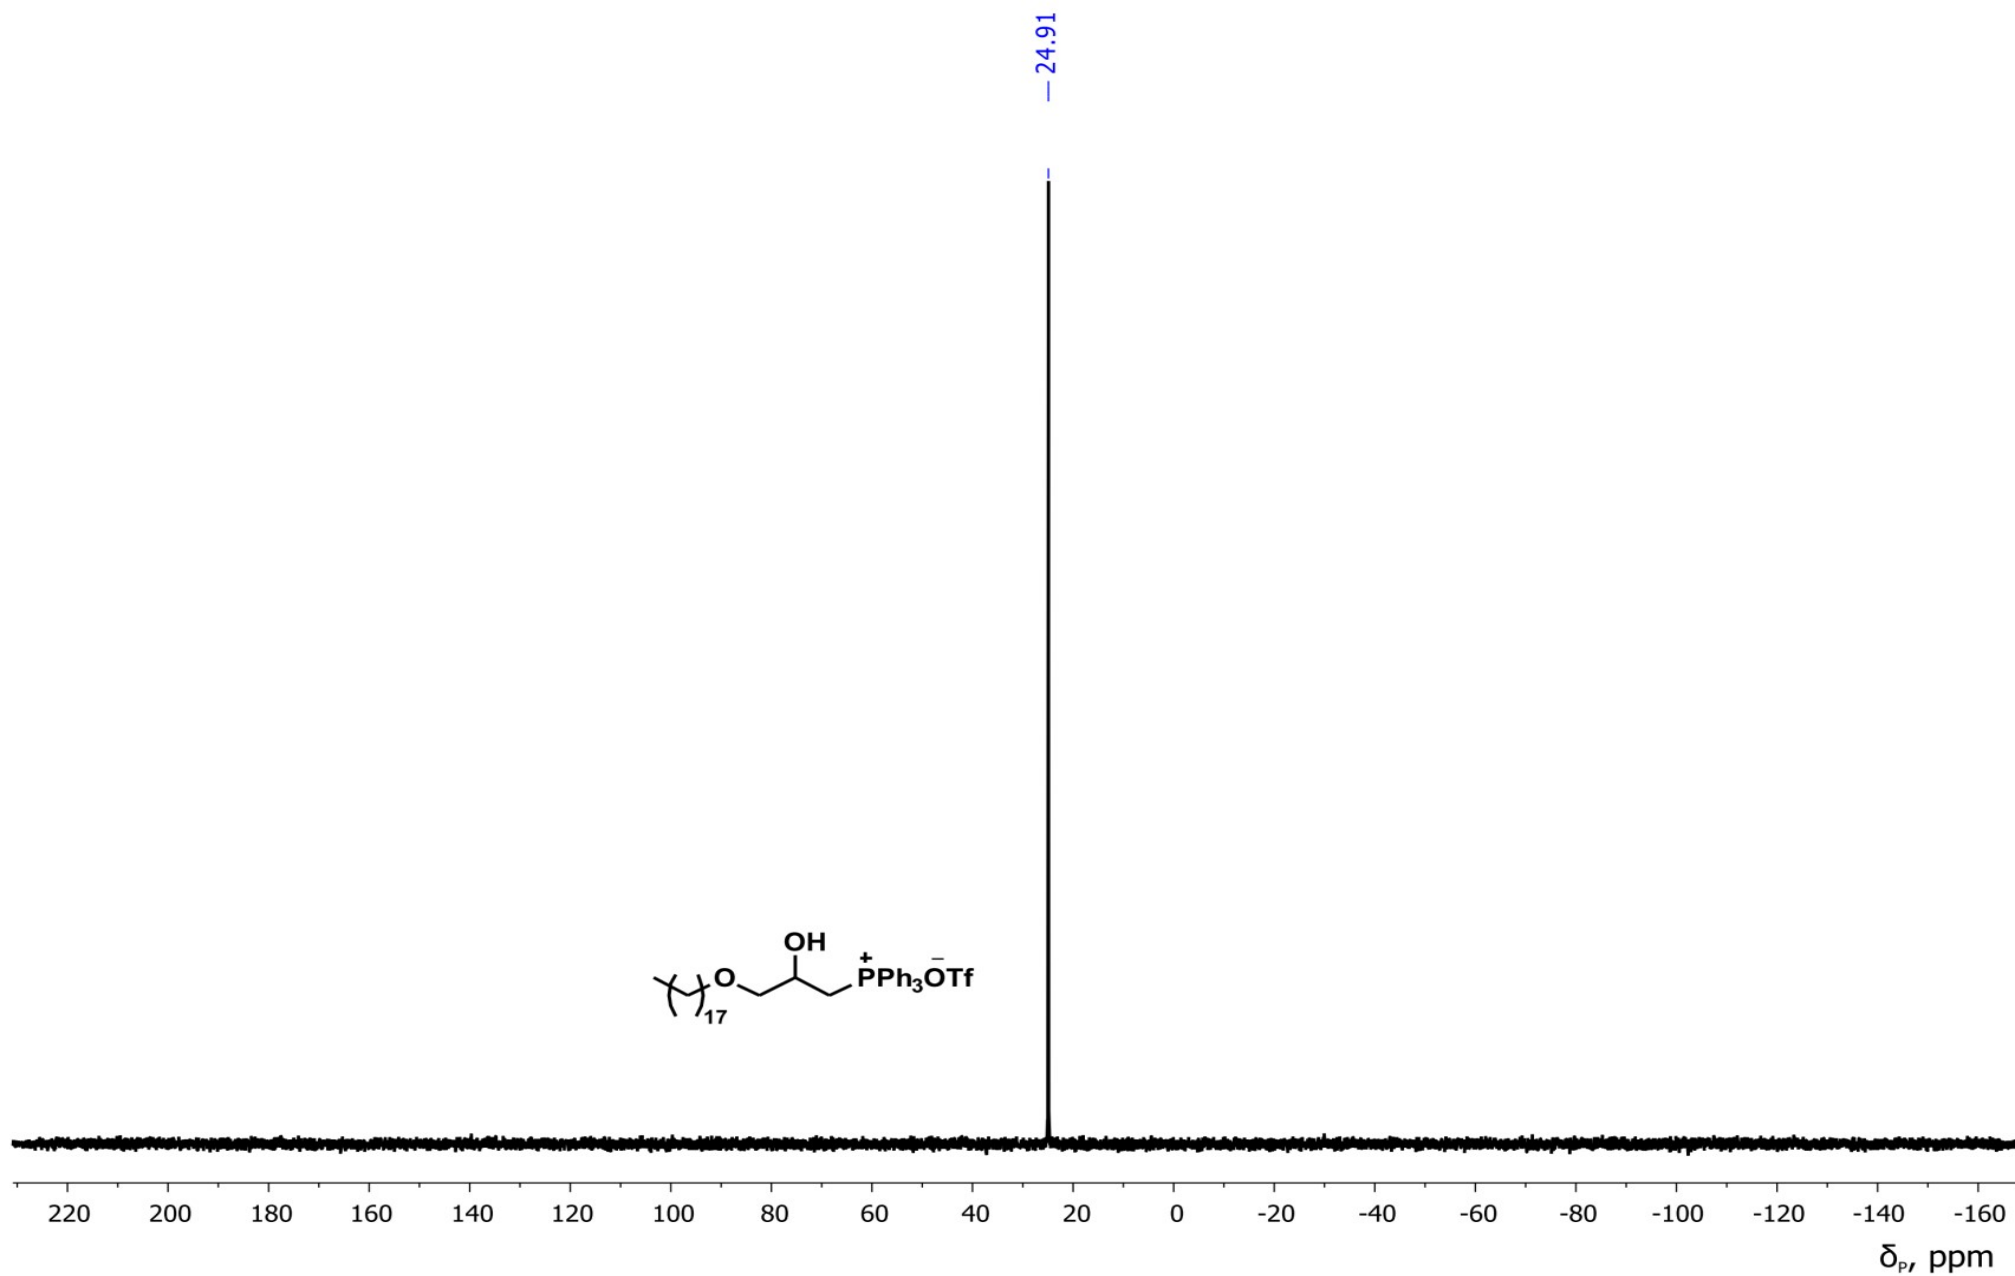

**Figure S94.**  $^{31}\text{P}$ - $\{^1\text{H}\}$  NMR spectrum (162 MHz,  $\text{CDCl}_3$ ) of compound **3j**.

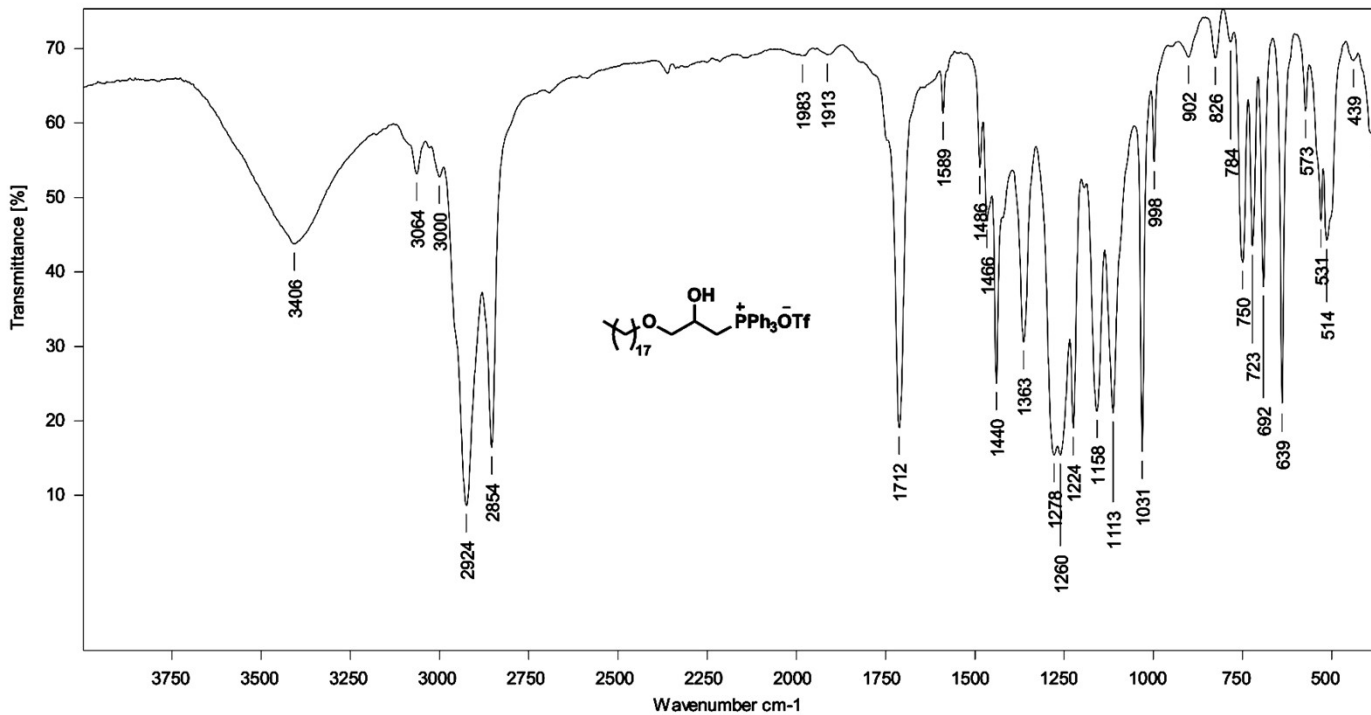

Figure S95. IR spectrum (KBr) of compound **3j**.

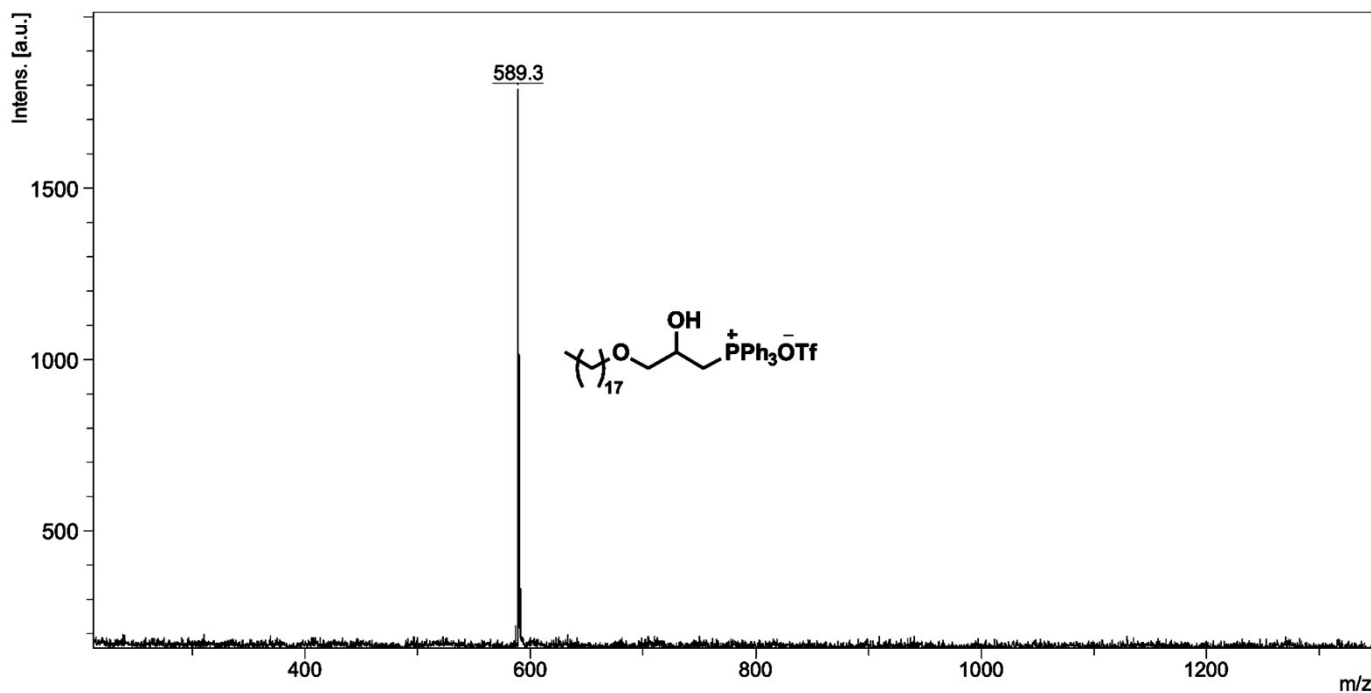

Figure S96. MALDI-MS spectrum of compound **3j**.

**Table S1**

Synthesis 2-hydroxyphosphonium salts by epoxy ring-opening reaction

| Compound                  | R                                 | Yield,<br>%        | Melting<br>(Tm),<br>°C  | point<br>Krafft temperature,<br>°C |
|---------------------------|-----------------------------------|--------------------|-------------------------|------------------------------------|
| <b>3a</b> <sup>[21]</sup> | CH <sub>3</sub>                   | 78 <sup>[21]</sup> | 122–124 <sup>[21]</sup> | –                                  |
| <b>3b</b> <sup>[21]</sup> | C <sub>2</sub> H <sub>5</sub>     | 77 <sup>[21]</sup> | 99–101 <sup>[21]</sup>  | –                                  |
| <b>3c</b>                 | n-C <sub>4</sub> H <sub>9</sub>   | 89                 | 109                     | –                                  |
| <b>3d</b>                 | n-C <sub>6</sub> H <sub>13</sub>  | 73                 | 90                      | –                                  |
| <b>3e</b>                 | n-C <sub>8</sub> H <sub>17</sub>  | 80                 | 79–80                   | –                                  |
| <b>3f</b> <sup>[21]</sup> | n-C <sub>10</sub> H <sub>21</sub> | 75 <sup>[21]</sup> | 78–79 <sup>[21]</sup>   | 70                                 |
| <b>3g</b>                 | n-C <sub>12</sub> H <sub>25</sub> | 84                 | 73–74                   | 36                                 |
| <b>3h</b>                 | n-C <sub>14</sub> H <sub>29</sub> | 87                 | 70–72                   | 58                                 |
| <b>3i</b>                 | n-C <sub>16</sub> H <sub>33</sub> | 79                 | 67                      | 68                                 |
| <b>3j</b>                 | n-C <sub>18</sub> H <sub>37</sub> | 78                 | 69–70                   | 68                                 |
| <b>4</b> <sup>[21]</sup>  | n-C <sub>10</sub> H <sub>21</sub> | –                  | 75–77 <sup>[21]</sup>   | 73                                 |
| <b>5</b>                  | n-C <sub>10</sub> H <sub>21</sub> | –                  | <20                     | 76                                 |

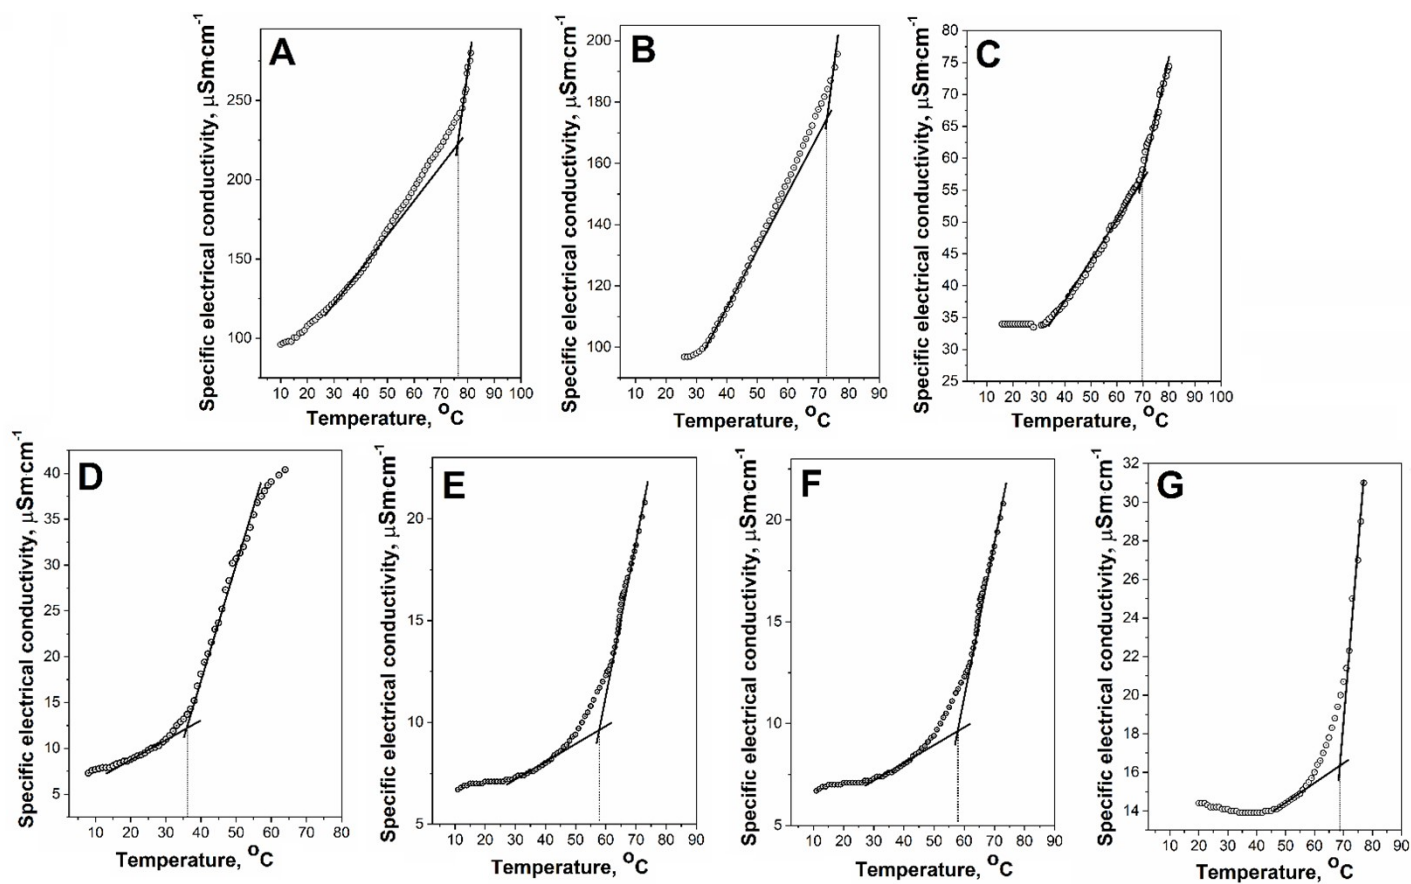

**Figure S97.** Specific electroconductivity of water solutions of **5** (A), **4** (B), **3f** (C), **3g** (D), **3h** (E), **3i** (F), **3j** (G) as a function of temperature.

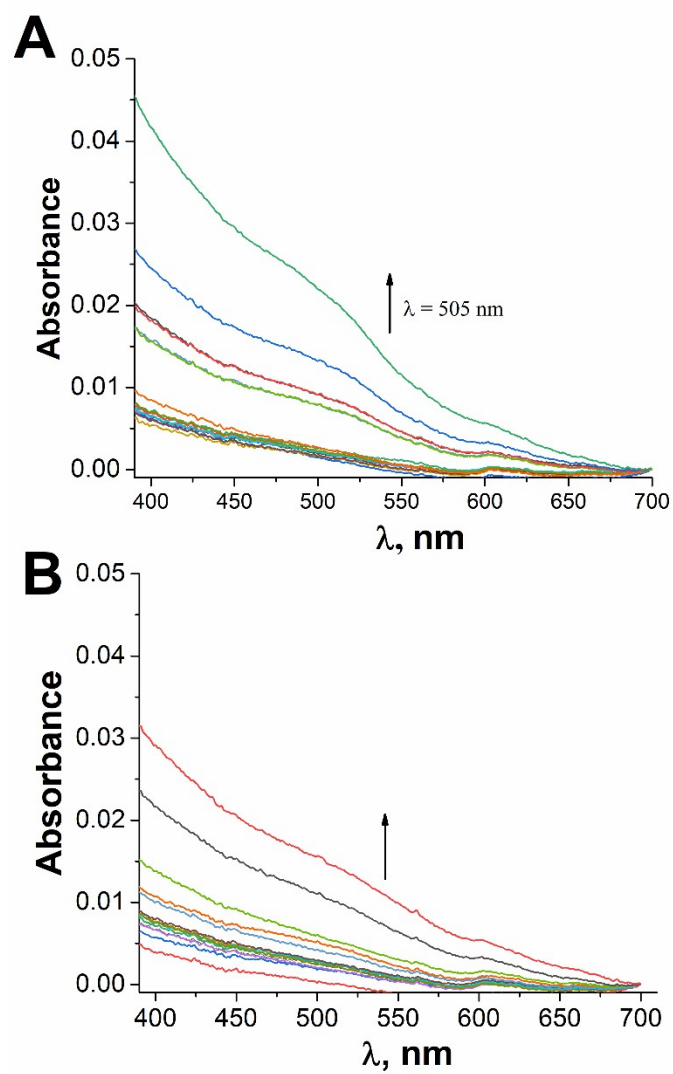

**Figure S98.** Absorption profile of Sudan I in solutions of **3g** (A), **3h** (B) with increasing their concentrations,  $L=1$  cm.

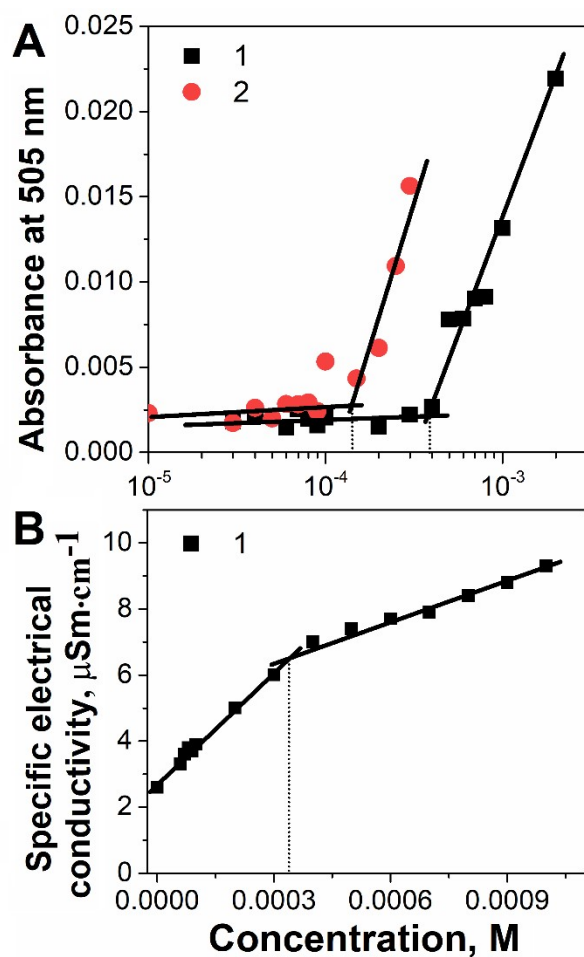

**Figure S99.** (A) Absorbance of Sudan I in solutions of **3g** (1) and **3h** (2)  $L = 1\text{cm}$ ,  $\lambda = 505\text{ nm}$ ; (B) Change in specific electrical conductivity of **3g** solutions (1),  $45\text{ }^\circ\text{C}$  (1) and  $60\text{ }^\circ\text{C}$  (2).

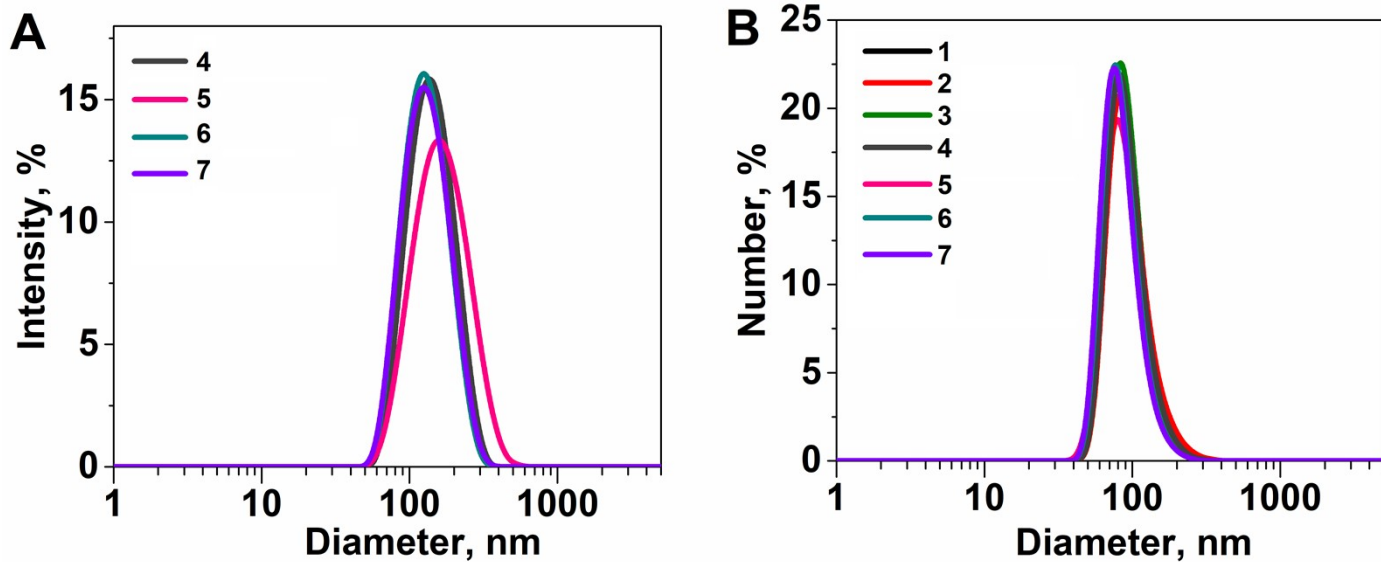

**Figure S100.** Particle size distribution using the intensity (A) and the number parameters (B) of PC/3g-liposomes (1, 4), RhB-loaded PC/3g-liposomes (2, 5), 3 – SPC/Ch/PEG/3g-liposomes (3, 6, 7), where 1, 2, 3 are samples measured on the first day of preparation and 4, 5, 6, 7 are samples after 5 months of storage, a stock diluted 20 times by water and 7 is diluted 20 times in 10 mM Tris buffer, pH = 7.4,  $C_{3g, 3h} = 0.05\%$  (w/w), 25°C.

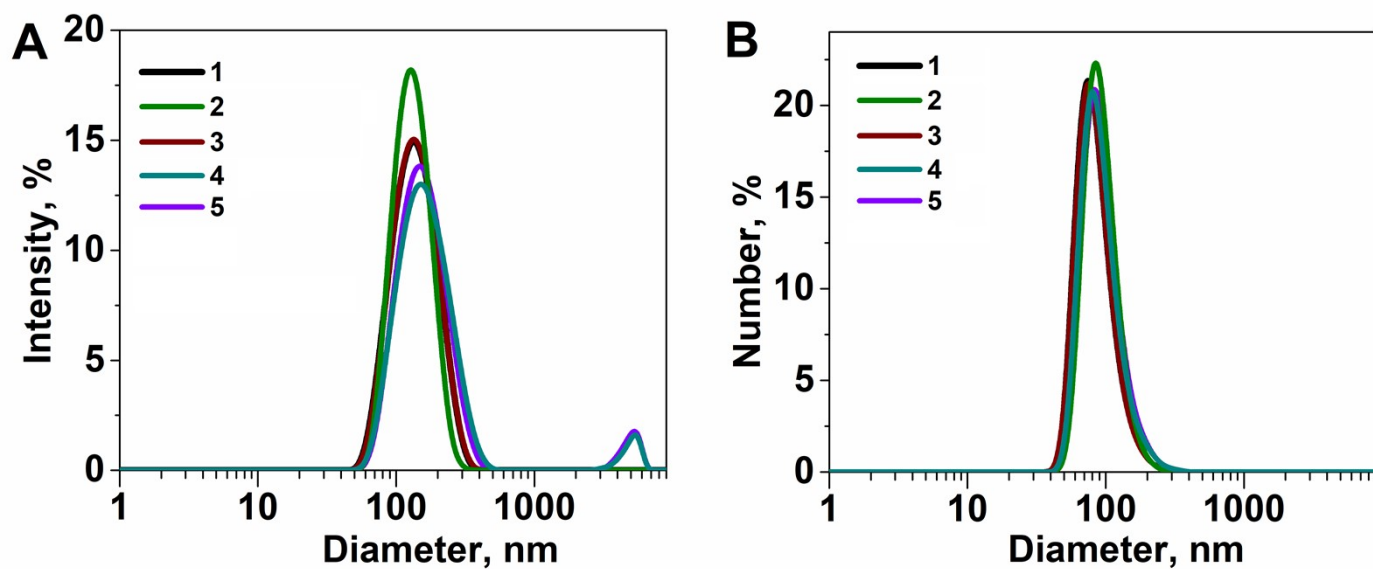

**Figure S101.** Particle size distribution using the intensity (A) and the number parameters (B) of PC/3h-liposomes (1, 3), SPC/Ch/PEG/3h-liposomes (2, 4, 5), where 1, 2 are samples measured on the first day of preparation and 3, 4, 5 are samples after 5 months of storage, a stock diluted 20 times by water and 5 is diluted 20 times in 10 mM Tris buffer, pH = 7.4,  $C_{3g, 3h} = 0.05$  % (w/w), 25 °C.

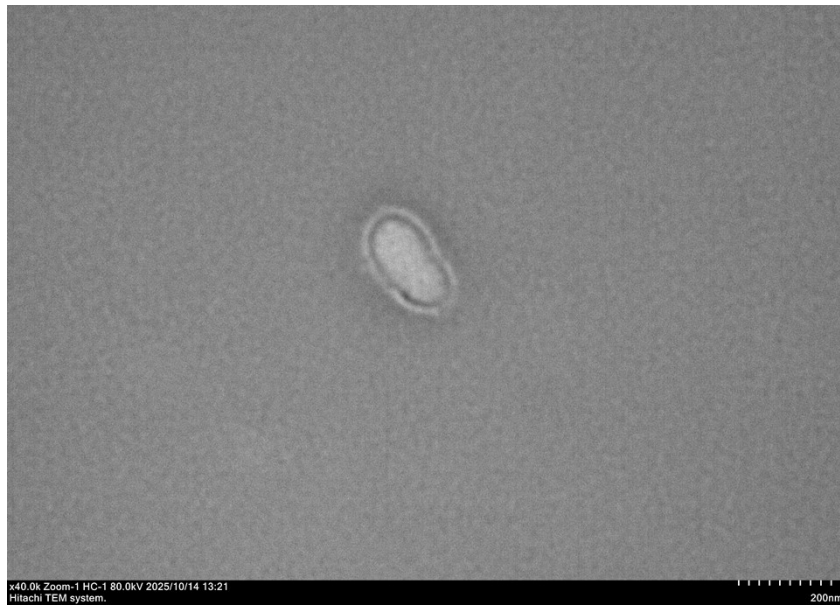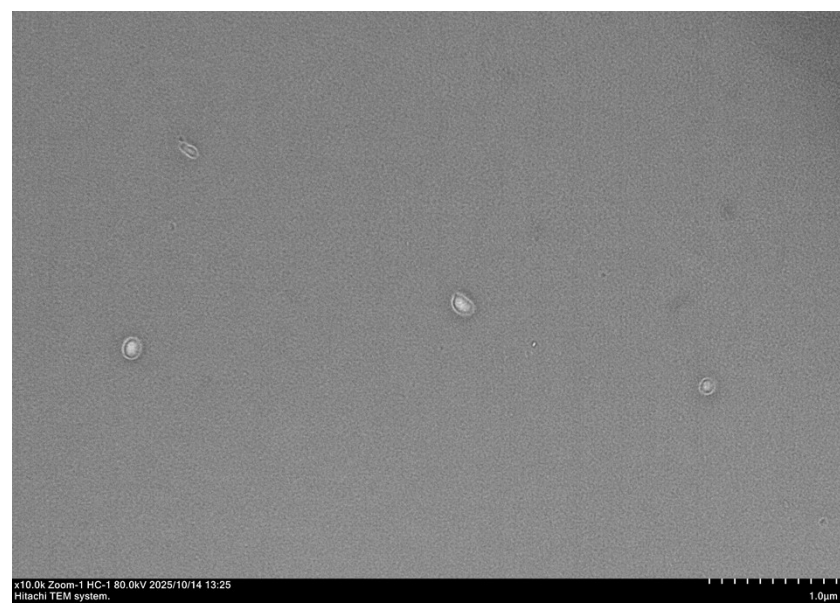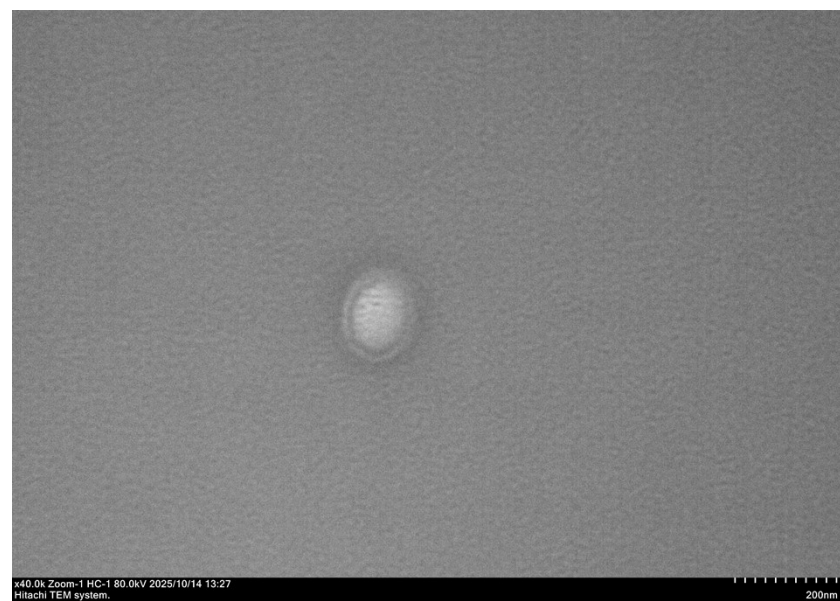

**Figure S102.** TEM imaging of SPC/Ch/PEG/3g-liposomes, a stock diluted 1000 times in 10 mM Tris buffer, pH = 7.4.

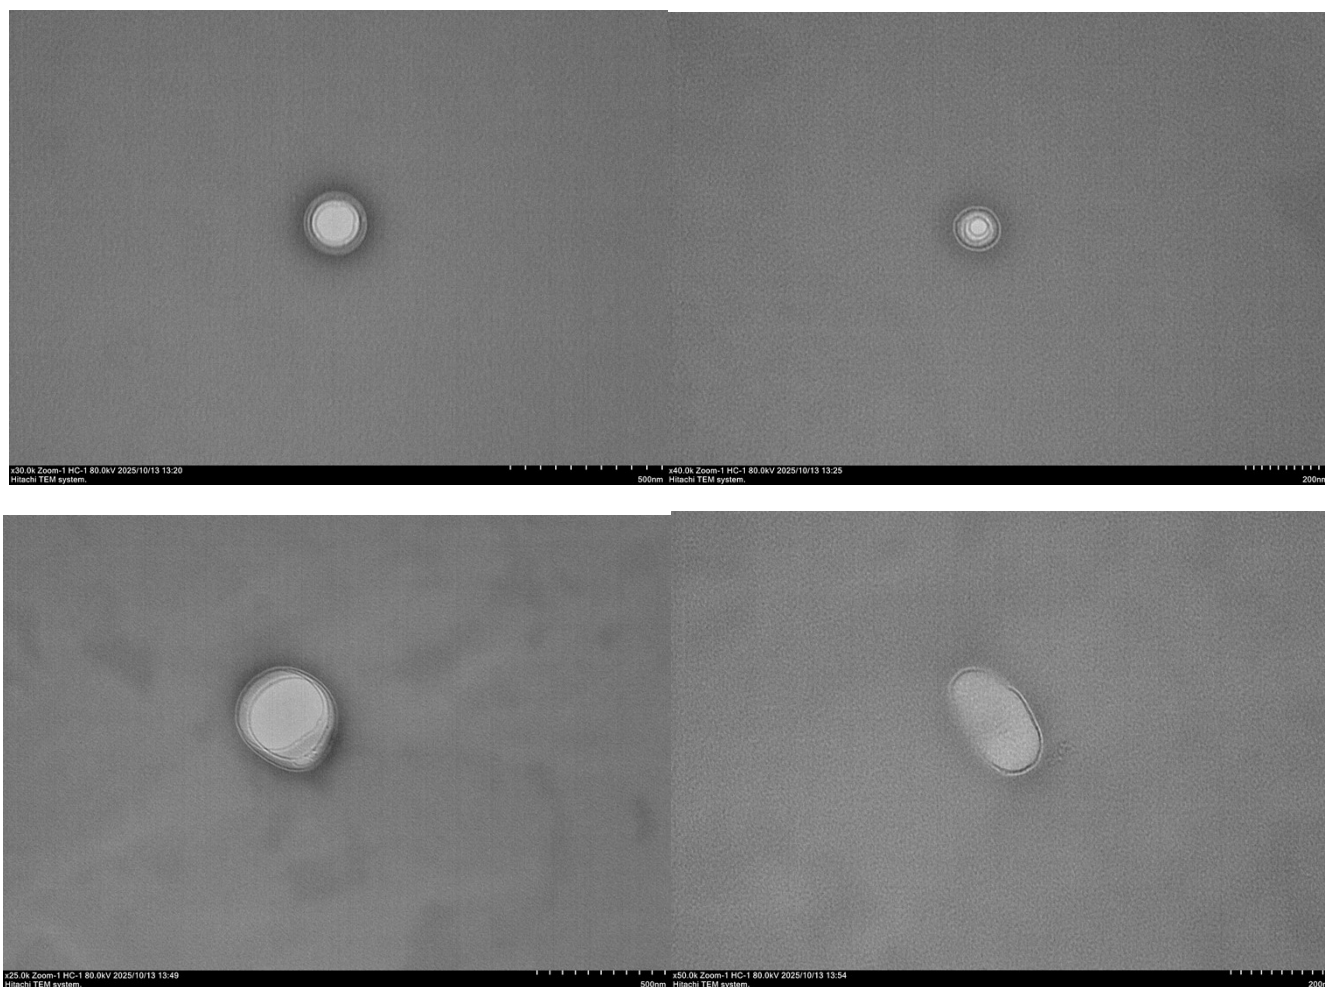

**Figure S103.** TEM imaging of SPC/Ch/PEG/**3h**-liposomes, a stock diluted 1000 times in 10 mM Tris buffer, pH = 7.4.

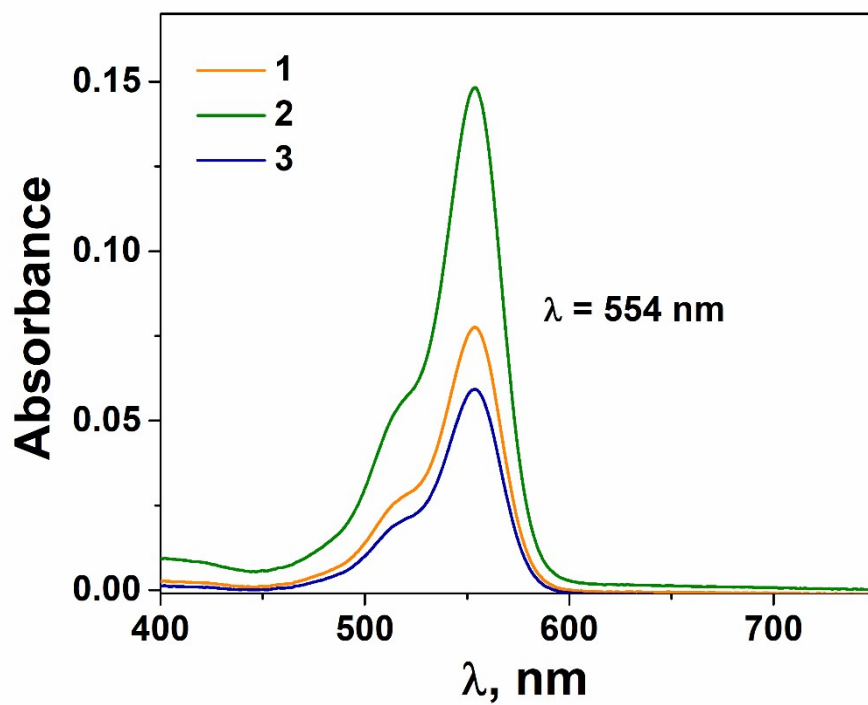

**Figure S104.** Absorbance spectra of RhB after ultracentrifugation of RhB-loaded PC/3g-liposomes in 0.025 phosphate buffer, pH=7.4, L=1cm, 25°C.

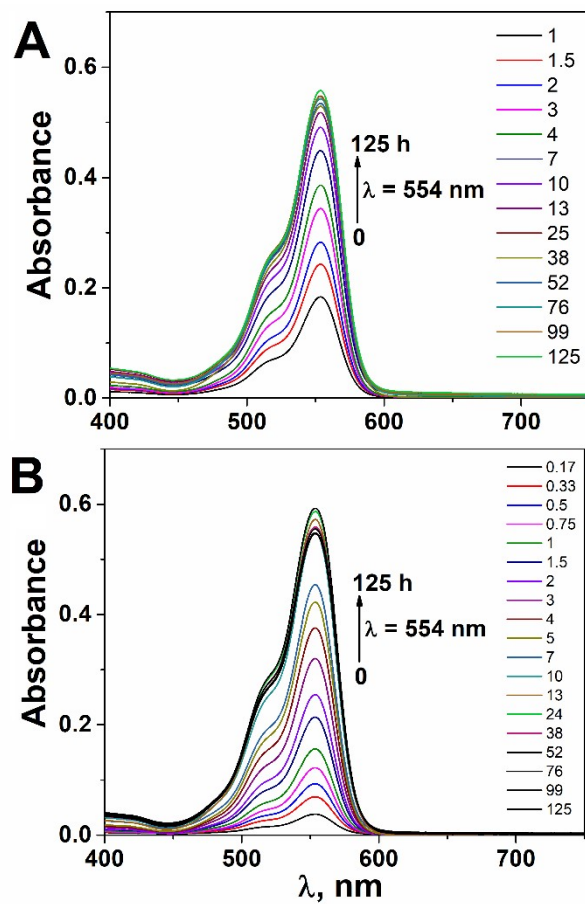

**Figure S105.** UV Absorbance spectra of Rhodamine B released from PC/3g-liposomes monitored by dialysis method during time, 0.025 M phosphate buffer, pH=7.4, 37°C (A), 45°C (B), L=1 cm.

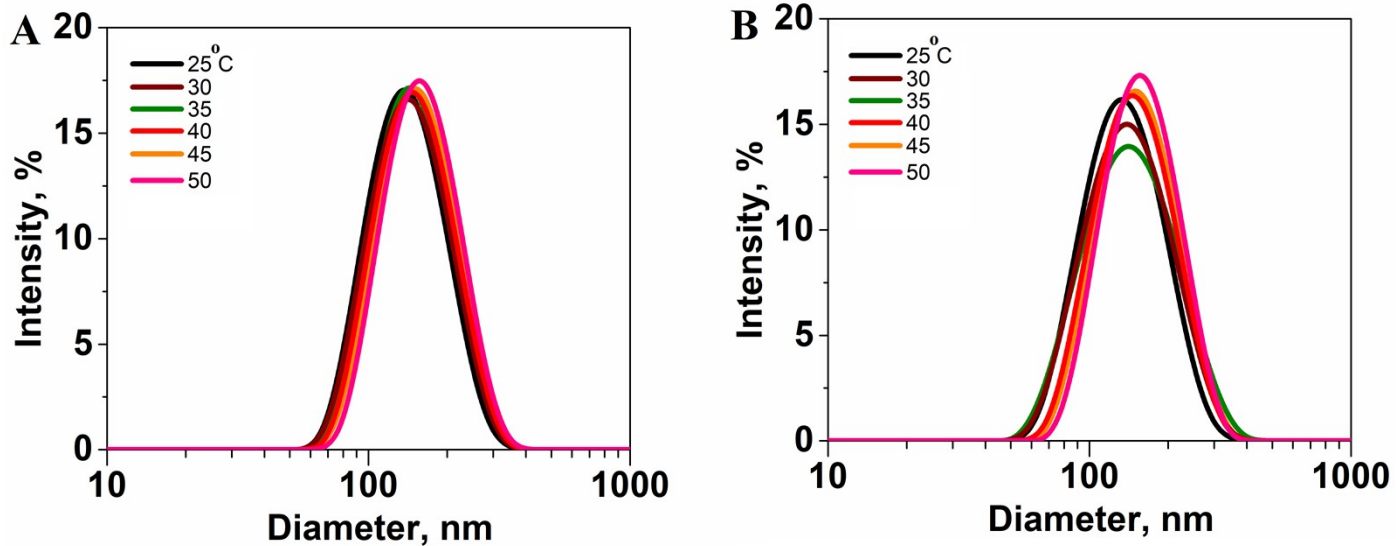

**Figure S106.** Particle size distribution using the intensity parameter of PC-liposomes (A) and of PC/3g-liposomes (B) at different temperatures 25°C, 30°C, 35°C, 40°C, 45°C, 50°C,  $C_{3g}=0.05$  % (w/w) in water.

**Table S2.** Cytotoxic effects ( $\mu\text{M}$ ) and selectivity index values (SI) of phosphonium salts **3a-j** and decorated liposomes

| Test compounds            | $\text{IC}_{50}$ ( $\mu\text{M}$ ) |                |                |                   |
|---------------------------|------------------------------------|----------------|----------------|-------------------|
|                           | Cancer cell lines                  |                |                | Normal cell lines |
|                           | MCF-7                              | A 549          | T98G           | WI38              |
| <b>3a</b> <sup>[25]</sup> | 61 $\pm$ 5                         | 39 $\pm$ 3     | 60 $\pm$ 4     | 36 $\pm$ 3        |
| <b>3b</b> <sup>[25]</sup> | 67 $\pm$ 5                         | 42 $\pm$ 3     | 63 $\pm$ 5     | 30 $\pm$ 2        |
| <b>3c</b>                 | 19 $\pm$ 2                         | 72.0 $\pm$ 0.7 | 17 $\pm$ 1     | 4.4 $\pm$ 0.05    |
| <b>3d</b>                 | 3.6 $\pm$ 0.3                      | 5.4 $\pm$ 0.4  | 41 $\pm$ 3     | 2.7 $\pm$ 0.2     |
| <b>3e</b>                 | 2.2 $\pm$ 0.1                      | 2.9 $\pm$ 0.2  | 11.0 $\pm$ 0.9 | 0.7 $\pm$ 0.05    |
| <b>3f</b> <sup>[25]</sup> | 2.9 $\pm$ 0.2                      | 3.7 $\pm$ 0.3  | 1.7 $\pm$ 0.1  | 3.1 $\pm$ 0.2     |
| <b>3g</b>                 | 0.7 $\pm$ 0.06                     | 1.3 $\pm$ 0.1  | 6.5 $\pm$ 0.5  | 0.3 $\pm$ 0.02    |
| PC/ <b>3g</b>             | –                                  | –              | –              | 1.4 $\pm$ 0.3     |
| SPC/Ch/PEG/ <b>3g</b>     | –                                  | –              | –              | 1.8 $\pm$ 0.2     |
| <b>3h</b>                 | 0.5 $\pm$ 0.03                     | 1.6 $\pm$ 0.1  | 4.1 $\pm$ 0.3  | 0.2 $\pm$ 0.01    |
| PC/ <b>3h</b>             | –                                  | –              | –              | 1.6 $\pm$ 0.06    |
| SPC/Ch/PEG/ <b>3h</b>     | –                                  | –              | –              | 2.8 $\pm$ 0.4     |
| <b>3i</b>                 | 16 $\pm$ 1                         | 56 $\pm$ 6     | 22 $\pm$ 1     | 8 $\pm$ 1         |
| <b>3j</b>                 | 10 $\pm$ 2                         | 4.5 $\pm$ 0.1  | 4.0 $\pm$ 0.03 | 0.7 $\pm$ 0.04    |
| doxorubicin               | 0.4 $\pm$ 0.04                     | 0.7 $\pm$ 0.05 | 1.0 $\pm$ 0.08 | 0.4 $\pm$ 0.05    |

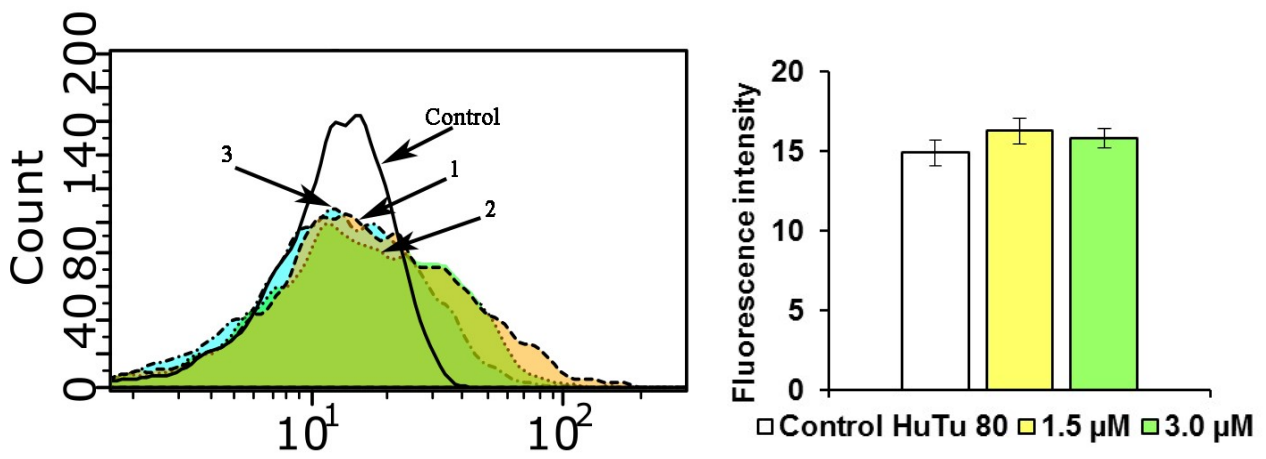

**Figure S107.** Effects on ROS level on HuTu 80 cell line by compound **3g** at concentration 1-1.5 μM; 2-3.0 μM; 3-6 μM.
